# Supplementary material for: Multi-ancestry Genome-wide Association Study of Inpatient Opioid Dosing Following Knee or Hip Arthroplasty
Source: Research Square preprint supplement (doi:10.21203/rs.3.rs-7330342/v1), 2025-08-21
Supplement: Supplementary file 1 [file 513e3160cec31a7c7348465b.xlsx]

## Sheet: Table of Contents
ST1	List of diagnosis codes, procedure codes and drug codes used for phenotyping
ST2	Lead SNPs for suggestive loci in cross-ancestry meta-analysis
ST3	Lead SNPs for suggestive loci in EUR ancestry individuals
ST4	Lead SNPs for suggestive loci in AFR ancestry individuals
ST5	Lead SNPs for suggestive loci in AMR ancestry individuals
ST6	Summary of genome-wide significant loci across all GWAS
ST7	MAGMA gene set tissue enrichment analysis in BrainSpan and GTeX data
ST8	Phenome-wide association with Phecodes in the Yale-Penn sample EUR and AFR samples
ST9	Phenome-wide association with Phecodes in the PMBB sample EUR and AFR samples

## Sheet: ST1
Supplementary Table 1: List of diagnosis codes, procedure codes and drug codes used for phenotyping
ICD Code	Description	CPT Code	Description
81.51	Total hip replacement	27090	Removal of prosthesis, hip joint, with or without insertion of spacer
81.52	Partial hip replacement	27091	Removal of prosthesis, hip joint, with or without insertion of spacer
81.53	Revision of hip replacement, not otherwise specified	27125	Hemiarthroplasty (partial hip replacement)
81.54	Total knee replacement	27130	Total hip arthroplasty (total hip replacement)
81.55	Partial knee replacement	27132	Conversion of previous hip surgery to total hip arthroplasty
84.57	Implantation of other internal orthopedic devices	27134	Revision of total hip arthroplasty; both components
Z96.64	Presence of artificial hip joint	27137	Revision of total hip arthroplasty; femoral component only
Z96.641	Presence of right artificial hip joint	27138	Revision of total hip arthroplasty; acetabular component only
Z96.642	Presence of left artificial hip joint	27236	Open treatment of femoral fracture, proximal end, neck, internal fixation
Z96.643	Presence of artificial hip joint, bilateral	27265	Closed treatment of post-hip arthroplasty dislocation without anesthesia
Z96.649	Presence of unspecified artificial hip joint	27266	Closed treatment of post-hip arthroplasty dislocation with anesthesia
V43.64	Hip joint replaced by other means	27440	Arthroplasty, knee, tibial plateau
V43.65	Knee joint replaced by other means	27441	Arthroplasty, knee, tibial plateau with debridement and partial synovectomy
Z96.65	Presence of artificial knee joint	27442	Arthroplasty, knee, femoral condyles or tibial plateau(s)
Z96.651	Presence of right artificial knee joint	27443	Arthroplasty, knee, femoral condyles or tibial plateau(s) with debridement
Z96.652	Presence of left artificial knee joint	27445	Arthroplasty, knee, hinge prosthesis (e.g., Walldius type)
Z96.653	Presence of artificial knee joint, bilateral	27446	Arthroplasty, knee, condyle and plateau; medial or lateral compartment
Z96.659	Presence of unspecified artificial knee joint	27447	Arthroplasty, knee, condyle and plateau; medial AND lateral compartments
0SR9069	Replacement of right hip joint with synthetic substitute, open approach	27486	Revision of total knee arthroplasty; one component
0SR906A	Replacement of right hip joint with synthetic substitute, open approach	27487	Revision of total knee arthroplasty; both components
0SR906Z	Replacement of right hip joint with synthetic substitute, open approach	27488	Removal of prosthesis, including total knee prosthesis, methylmethacrylate
0SR90EZ	Replacement of right hip joint with synthetic substitute, open approach
0SRB069	Replacement of left hip joint with synthetic substitute, open approach	Drug code	Description
0SRB06A	Replacement of left hip joint with synthetic substitute, open approach	CN101	Opioid Analgesics
0SRB06Z	Replacement of left hip joint with synthetic substitute, open approach	RE301	Opioid-Containing Antitussives/Expectorants
0SRB0EZ	Replacement of left hip joint with synthetic substitute, open approach
0SRC069	Replacement of right knee joint with synthetic substitute, open approach
0SRC06A	Replacement of right knee joint with synthetic substitute, open approach
0SRC06Z	Replacement of right knee joint with synthetic substitute, open approach
0SRC0EZ	Replacement of right knee joint with synthetic substitute, open approach
0SRC0L9	Replacement of right knee joint with synthetic substitute, open approach
0SRC0LA	Replacement of right knee joint with synthetic substitute, open approach
0SRC0LZ	Replacement of right knee joint with synthetic substitute, open approach
0SRC0M9	Replacement of right knee joint with synthetic substitute, open approach
0SRC0MA	Replacement of right knee joint with synthetic substitute, open approach
0SRC0MZ	Replacement of right knee joint with synthetic substitute, open approach
0SRC0N9	Replacement of right knee joint with synthetic substitute, open approach
0SRC0NA	Replacement of right knee joint with synthetic substitute, open approach
0SRC0NZ	Replacement of right knee joint with synthetic substitute, open approach
0SRD069	Replacement of left knee joint with synthetic substitute, open approach
0SRD06A	Replacement of left knee joint with synthetic substitute, open approach
0SRD06Z	Replacement of left knee joint with synthetic substitute, open approach
0SRD0EZ	Replacement of left knee joint with synthetic substitute, open approach
0SRD0L9	Replacement of left knee joint with synthetic substitute, open approach
0SRD0LA	Replacement of left knee joint with synthetic substitute, open approach
0SRD0LZ	Replacement of left knee joint with synthetic substitute, open approach
0SRD0M9	Replacement of left knee joint with synthetic substitute, open approach
0SRD0MA	Replacement of left knee joint with synthetic substitute, open approach
0SRD0MZ	Replacement of left knee joint with synthetic substitute, open approach
0SRD0N9	Replacement of left knee joint with synthetic substitute, open approach
0SRD0NA	Replacement of left knee joint with synthetic substitute, open approach
0SRD0NZ	Replacement of left knee joint with synthetic substitute, open approach
0SR9049	Replacement of right hip joint with synthetic substitute, open approach
0SR904A	Replacement of right hip joint with synthetic substitute, open approach
0SR904Z	Replacement of right hip joint with synthetic substitute, open approach
0SH908Z	Insertion of internal fixation device into right hip joint, open approach
0SRB049	Replacement of left hip joint with synthetic substitute, open approach
0SRB04A	Replacement of left hip joint with synthetic substitute, open approach
0SRB04Z	Replacement of left hip joint with synthetic substitute, open approach
0SHB08Z	Insertion of internal fixation device into left hip joint, open approach
0SRC0J9	Replacement of right knee joint with synthetic substitute, open approach
0SRC0JA	Replacement of right knee joint with synthetic substitute, open approach
0SRC0JZ	Replacement of right knee joint with synthetic substitute, open approach
0SHC08Z	Insertion of internal fixation device into right knee joint, open approach
0SRD0J9	Replacement of left knee joint with synthetic substitute, open approach
0SRD0JA	Replacement of left knee joint with synthetic substitute, open approach
0SRD0JZ	Replacement of left knee joint with synthetic substitute, open approach
0SHD08Z	Insertion of internal fixation device into left knee joint, open approach

## Sheet: ST2
Supplementary Table 2: Lead SNPs for suggestive loci in cross-ancestry meta-analysis
No	GenomicLocus	chr	pos	uniqID	rsID	non_effect_allele	effect_allele	beta	se	gwasP	MAF	nearestGene	mapped trait in GWAS catalog [PMID]	dist	func	type	CADD	RDB	pLI	ncRVIS	minChrState	commonChrState	ensg	posMapSNPs	posMapMaxCADD	eqtlMapSNPs	eqtlMapminP	eqtlMapminQ	eqtlMapts	eqtlDirection	ciMap	ciMapts
1	1	1	65148949	1:65148949:C:T	rs12757683	C	T	0.1277	0.02757	3.629e-06	0.07568	CACHD1	cerebral cortex area attribute [34560273], brain attribute [34910505], cerebral cortex area attribute [34910505]	0	intronic	protein_coding	11.07	7	0.838037	0.0563902	4	5	ENSG00000158966	1	11.07	0					No
2	2	3	43519541	3:43519541:G:T	rs114400205	G	T	-0.1705	0.03462	8.424e-07	0.01777	ANO10	attention deficit hyperactivity disorder, risk-taking behaviour [38565336], BMI-adjusted waist-hip ratio [31669095], BMI-adjusted hip circumference [34165540], smoking initiation [36477530], major depressive disorder [37464041], BMI-adjusted waist-hip ratio [34021172]	0	intronic	protein_coding	4.524	5	1.9226e-06	0.104488	2	15	ENSG00000160746	8	4.524	0					No
3	3	7	141853252	7:141853252:A:G	rs12537171	G	A	-0.1328	0.02866	3.585e-06	0.2188	RP11-1220K2.2		0	intronic	protein_coding	5.695	2b	0.02938		5	15	ENSG00000257743	6	5.695	0					No
4	4	9	116342706	9:116342706:A:G	rs118049114	G	A	-0.2336	0.04928	2.134e-06	0.003794	RGS3:RP11-168K11.2	self reported educational attainment [30038396], cognitive function measurement [31596458], educational attainment [35361970]	00:00:00	ncRNA_intronic		1.415	2b			2	7
5	5	10	122865335	10:122865335:G:T	rs74539733	G	T	0.2318	0.04849	1.749e-06	0.01837	RP11-159H3.1		27268	intergenic		0.719	6			5	15
6	6	11	13390084	11:13390084:G:T	rs117841923	G	T	0.2263	0.04882	3.576e-06	0.001398	ARNTL		0	intronic	protein_coding	0.1		0.987643		4	4	ENSG00000133794	1	0.1	0					No
7	7	12	68882207	12:68882207:C:T	rs113208954	C	T	0.1721	0.03528	1.067e-06	0.006589	RP11-81H14.4		563	downstream		1.919	6			5	15
8	8	12	130613548	12:130613548:A:G	rs79597442	G	A	0.2263	0.04818	2.656e-06	0.02117	FZD10-AS1	amygdala volume [37391117], gambling behaviour [22780124], hippocampal CA1 volume [37337106], neuroimaging measurement [35164939], cortical thickness [34910505], cerebral cortex area attribute [34560273], cortical thickness [34560273], brain attribute [34910505], cerebral cortex area attribute [34910505], mathematical ability [30038396], educational attainment [35361970], hip bone mineral density…	21345	intergenic		1.792	2b			2	15
9	9	14	63662844	14:63662844:C:T	rs141931440	C	T	0.1939	0.03941	8.674e-07	0.01078	RHOJ	obsessive-compulsive disorder, autism spectrum disorder [28641744]	7987	intergenic	protein_coding	0.464	6	0.229658	1.99188	5	15	ENSG00000126785	1	0.464	0					No
10	10	14	103483631	14:103483631:A:G	rs117515502	G	A	0.2059	0.0422	1.064e-06	0.003994	CDC42BPB	major depressive disorder [29662059], amygdala volume [40097784]	0	intronic	protein_coding	0.392	7	1		4	5	ENSG00000198752	2	4.384	0					No
11	11	15	97969418	15:97969418:C:T	rs114102149	C	T	-0.2368	0.04912	1.43e-06	0.01238	CTD-2147F2.1:CTD-2147F2.2		00:00:00	ncRNA_intronic		2.107	6			5	15
11	11	15	97969418	15:97969418:C:T	rs114102149	C	T	-0.2368	0.04912	1.43e-06	0.01238	CTD-2147F2.1:CTD-2147F2.2		00:00:00	ncRNA_intronic		2.107	6			5	15
12	12	16	12683069	16:12683069:C:T	rs74778250	C	T	0.2311	0.05001	3.798e-06	0.02596	CTD-3037G24.3		0	ncRNA_intronic		1.264	6			7	15
13	13	21	43426393	21:43426393:A:G	rs143032437	G	A	0.08449	0.01846	4.734e-06	0.04732	ZBTB21		0	intronic	protein_coding	0.257	5	0.986131	-0.340833	4	5	ENSG00000173276	2	15.73	0					No

## Sheet: ST3
Supplementary Table 3: Lead SNPs for suggestive loci in EUR ancestry
No	GenomicLocus	chr	pos	uniqID	rsID	non_effect_allele	effect_allele	beta	se	gwasP	MAF	IndSigSNP	nearestGene	mapped trait in GWAS catalog [PMID]	dist	func	type	CADD	RDB	pLI	ncRVIS	minChrState	commonChrState	ensg	posMapSNPs	posMapMaxCADD	eqtlMapSNPs	eqtlMapminP	eqtlMapminQ	eqtlMapts	eqtlDirection	ciMap	ciMapts
Knee arthroplasty
12	12	14	103483631	14:103483631:A:G	rs117515502	G	A	43.38	8.38	2.29039e-07	0.01292	rs117515502	CDC42BPB	smoking status measurement [30643251], major depressive disorder [29662059]	0	intronic	protein_coding	0.392	7	1		4	5	ENSG00000198752	2	4.384	0					No
9	9	9	71693143	9:71693143:A:T	rs11145073	T	A	22.14	4.334	3.29873e-07	0.05567	rs11145073	FXN	sleep quality [27126917], major depressive disorder [34586374], obesity [31504550], pain [37844115], non-alcoholic fatty liver disease, type 2 diabetes mellitus [37033223], cancer [29299148]	0	intronic	protein_coding	4.283	7	0.817754	1.89795	4	5	ENSG00000165060	36	9.456	34	3.68091e-06	1.08444e-11	GTEx/v8/Muscle_Skeletal	-	No
5	5	5	17030227	5:17030227:C:T	rs537951761	T	C	34.17	6.753	4.25635e-07	0.02087	rs537951761	BASP1	bipolar disorder [23092984], hippocampal atrophy [19668339], revision of total hip arthroplasty, aseptic loosening [34982741], blood glucose amount, trait in response to hydrochlorothiazide [23400010]	35479	intergenic		0.574				5	15
1	1	1	98131950	1:98131950:A:G	rs115816339	G	A	38.66	7.722	5.62926e-07	0.01491	rs115816339	DPYD	self reported educational attainment [27225129], response to beta blocker, heart rate [29478026], sleep duration trait [30531941], cognitive function measurement [30038396], schizophrenia, intelligence, self reported educational attainment [31374203], schizophrenia [30285260], anxiety measurement [30867560], schizophrenia [26198764], cognitive function measurement, self reported educational attai…	0	intronic	protein_coding	0.346	5	4.18972e-09	0.587602	5	15	ENSG00000188641	3	3.195	0					No
2	2	3	5220765	3:5220765:C:CT	rs200903833	C	CT	34.12	6.944	9.05199e-07	0.01988	rs200903833	ARL8B:AC026202.3		0	ncRNA_intronic		16.91				4	4
3	3	3	43442879	3:43442879:A:G	rs192429455	A	G	45.09	9.346	1.41906e-06	0.01988	rs192429455	SNRK:ANO10		0	intronic		10.87	5			4	15
7	7	6	112518945	6:112518945:C:T	rs78644952	C	T	44.67	9.403	2.0499e-06	0.00994	rs78644952	LAMA4	BMI-adjusted waist-hip ratio [31669095], short sleep [36463630], BMI-adjusted waist-hip ratio [30239722], waist-hip ratio [30595370], BMI-adjusted waist-hip ratio [34021172], gut microbiome measurement, breastfeeding duration [40187613], bipolar disorder [31043756], joint damage measurement [33585033]	0	intronic	protein_coding	0.735	5	9.75012e-09	-0.580599	4	15	ENSG00000112769	16	9.68	0					No
4	4	3	76961245	3:76961245:C:T	rs9868326	T	C	8.61	1.818	2.20611e-06	0.3797	rs9868326	ROBO2	major depressive disorder [29942085], schizophrenia [31740837], self reported educational attainment [30038396], smoking status measurement [30643251], brain attribute [33821002], schizophrenia [32606422], depressive symptom measurement [32606422], type 2 diabetes mellitus [32541925], gut microbiome measurement [33208821], brain attribute, neuroimaging measurement [32665545], schizophrenia [26198…	0	intronic	protein_coding	0.2	7	0.999996	-0.391564	5	15	ENSG00000185008	6	2.759	0					No
8	8	8	1111158	8:1111158:C:T	rs7008181	T	C	21.36	4.602	3.50021e-06	0.04374	rs7008181	CTD-2281E23.2		0	ncRNA_intronic		10.47	5			5	15
10	10	9	89382826	9:89382826:C:T	rs138651619	C	T	35.96	7.768	3.70933e-06	0.01392	rs138651619	RP11-395D3.1		71414	intergenic		0.21	5			5	15
6	6	5	94310117	5:94310117:A:T	rs186096	T	A	28.96	6.319	4.62967e-06	0.02187	rs186096	MCTP1	smoking initiation [33082346], smoking status measurement [30643251], bipolar disorder [19416921], FEV/FVC ratio, response to bronchodilator [26634245], forced expiratory volume, response to bronchodilator [26634245], smoking initiation [36477530], smoking initiation [30679032], smoking behavior [30643258], bipolar disorder [31043756], smoking status measurement [30595370], survival time, trait i…	0	intronic	protein_coding	2.668	7	0.00988912	-0.289821	5	15	ENSG00000175471	1	2.668	0					No
11	11	12	3274255	12:3274255:A:G	rs75569371	G	A	26.47	5.785	4.79935e-06	0.02087	rs75569371	TSPAN9	response to mepolizumab, Glucocorticoid use measurement [32009195], gut microbiome measurement, taxonomic microbiome measurement [27723756], smoking initiation [36477530], temporomandibular joint disorder [23746317], BMI-adjusted waist-hip ratio [30239722], waist-hip ratio [30595370], neuroticism measurement, major depressive disorder [30571770], BMI-adjusted waist-hip ratio [30575882], waist-hip…	0	intronic	protein_coding	18.94	2b	0.779778	1.65356	2	15	ENSG00000011105	2	18.94	0					Yes	Promoter_anchored_loops
Hip arthroplasty
10	10	5	154347356	5:154347356:A:G	rs115692385	G	A	53.61	10.44	2.87e-07	0.01093	rs115692385	MRPL22	major depressive disorder [34586374]	0	UTR3	protein_coding	5.557	4	3.44e-07	0.276799	1	4	ENSG00000082515	2	5.557	0					No
8	8	4	189171046	4:189171046:C:T	rs4476671	T	C	14.98	2.921	3.04e-07	0.3469	rs4476671	RP11-366H4.1		88752	intergenic		1.039	7			9	15
18	18	18	25980436	18:25980436:G:T	rs192024199	T	G	64.33	13.06	8.63e-07	0.00994	rs192024199	CDH2	intelligence [29844566], cognitive function measurement [30038396], self reported educational attainment [30038396], intelligence [29326435], educational attainment [35361970], gut microbiome measurement, environmental exposure measurement [40187613], neuroticism measurement [37783279], heart rate [27798624], smoking status measurement [30643251], non-alcoholic fatty liver disease, cirrhosis of l…	223025	intergenic		0.462	7			15	15
12	12	8	142715815	8:142715815:A:G	rs111066413	G	A	63.29	12.87	9.01e-07	0.0159	rs111066413	AC138647.1		186977	intergenic		1.308	5			5	14
1	1	1	112293137	1:112293137:A:G	rs80301732	G	A	43.75	9.084	1.5e-06	0.03479	rs80301732	FAM212B		0	intronic	protein_coding	0.082	5	0.00359052	0.902451	5	15	ENSG00000197852	3	1.949	0					Yes	Promoter_anchored_loops
2	2	1	116257248	1:116257248:A:G	rs80144819	A	G	55.32	11.5	1.52e-06	0.02286	rs80144819	CASQ2	heart function attribute [33495596], heart rate variability measurement [28610988], electrocardiography, magnetic resonance imaging of the heart [37105979], magnetic resonance imaging of the heart [37105979]	0	intronic	protein_coding	6.93	3a	1.07e-06	1.10163	2	15	ENSG00000118729	1	6.93	0					No
6	6	3	195393086	3:195393086:A:G	rs201125791	G	A	80.07	16.64	1.53e-06	0.01392	rs201125791	LINC00969:SDHAP2		0	ncRNA_exonic:splicing		21.7	7			4	5
13	13	9	24056255	9:24056255:A:G	rs34258342	G	A	48.23	10.17	2.15e-06	0.0338	rs34258342	RP11-321L2.2		158202	intergenic		0.878	7			9	15
14	14	9	116365865	9:116365865:C:T	rs144456706	C	T	60.36	12.78	2.39e-06	0.01392	rs144456706	RGS3	self reported educational attainment [30038396], cognitive function measurement [31596458], gut microbiome measurement [33462482], educational attainment [35361970], gut microbiome measurement, breastfeeding duration [40187613]	5846	intergenic	protein_coding	0.01	5	9.68e-05	0.352234	5	15	ENSG00000138835	5	9.971	5	3.53e-09	3.9e-29	GTEx/v8/Whole_Blood:GTEx/v8/Pancreas:GTEx/v8/Thyroid	+	Yes	Promoter_anchored_loops
20	20	19	45221459	19:45221459:C:G	rs181278716	G	C	43.52	9.266	2.69e-06	0.0338	rs181278716	CTB-171A8.1		0	ncRNA_intronic		1.365	5			1	15
3	3	3	22520284	3:22520284:C:T	rs151216341	C	T	70.62	15.05	2.76e-06	0.00994	rs151216341	HMGB1P5	cognitive decline measurement [30954325], FEV/FVC ratio, response to bronchodilator [26634245], gut microbiome measurement [33462482]	95863	intergenic		2.396	7			9	15
19	19	19	18691033	19:18691033:C:T	rs117676382	C	T	46.4	9.895	2.79e-06	0.02087	rs117676382	CRLF1	smoking initiation [36477530], osteoarthritis, spine [40205036], post-traumatic stress disorder symptom measurement [33510476]	0	intergenic	protein_coding	6.653	6	0.0268556		5	5	ENSG00000006016	1	6.653	0					No
4	4	3	86648929	3:86648929:A:G	rs187732202	G	A	45.77	9.776	2.9e-06	0.008946	rs187732202	RP11-331K15.1		102782	intergenic		0.715	7			9	15
7	7	4	134371230	4:134371230:C:CA	rs144430841	CA	C	25.34	5.415	2.93e-06	0.07853	rs144430841	AC105252.1		110780	intergenic		8.236				4	15
21	21	22	49351163	22:49351163:G:GGGCTCCA	rs111423389	G	GGGCTCCA	74.04	15.84	2.99e-06	0.01093	rs111423389	WI2-81516E3.1		56964	intergenic		5.52				5	15
9	9	5	108186372	5:108186372:A:G	rs72791992	A	G	49.83	10.75	3.61e-06	0.02386	rs72791992	FER	major depressive disorder [31969693], schizophrenia [26198764], smoking behavior, BMI-adjusted waist circumference [28443625], BMI-adjusted hip circumference [34021172], gut microbiome measurement, birth weight [40187613], hospitalisation, psychiatric disorder [38469033], trait in response to abacavir, virologic response measurement [25461247], educational attainment [35361970], gut microbiome me…	0	intronic	protein_coding	0.973	7	0.96842	1.73407	5	15	ENSG00000151422	4	9.113	0					No
16	16	12	117335828	12:117335828:C:T	rs117174090	C	T	70.24	15.18	3.78e-06	0.008946	rs117174090	RP11-240G22.1		10288	intergenic		0.452	3a			9	14
5	5	3	128320778	3:128320778:A:G	rs184335099	G	A	58.91	12.81	4.34e-06	0.02286	rs184335099	RPN1	chronic kidney disease [31178898]	18038	intergenic		0.265	7			5	15
15	15	10	11705037	10:11705037:A:G	rs75258269	G	A	67.32	14.72	4.91e-06	0.008946	rs75258269	RP11-138I18.2		16636	intergenic		1.15	4			5	15
17	17	15	72631772	15:72631772:A:G	rs117371536	G	A	38.65	8.457	4.95e-06	0.02684	rs117371536	RP11-106M3.3:RP11-106M3.2		0	ncRNA_intronic		3.978	5			2	5
11	11	6	90693328	6:90693328:C:T	rs13347342	C	T	18.34	4.013	4.96e-06	0.1481	rs13347342	BACH2	type 2 diabetes mellitus [30572963], type 1 diabetes mellitus [18978792], type 1 diabetes mellitus [18840781], type 1 diabetes mellitus [21829393], type 1 diabetes mellitus [19430480], neuropsychological test [20125193], latent autoimmune diabetes in adults [30254083], BMI-adjusted hip circumference [28552196], type 1 diabetes mellitus [25751624], cesarean section, intelligence [30378284], respon…	0	intronic	protein_coding	2.814	7	0.87404	0.545282	4	15	ENSG00000112182	6	15.73	0					Yes	Promoter_anchored_loops

## Sheet: ST4
Supplementary Table 4: Lead SNPs for suggestive loci in AFR ancestry
No	GenomicLocus	chr	pos	uniqID	rsID	non_effect_allele	effect_allele	beta	se	gwasP	MAF	IndSigSNP	nearestGene	mapped trait in GWAS catalog [PMID]	dist	func	type	CADD	RDB	pLI	ncRVIS	minChrState	commonChrState	ensg	posMapSNPs	posMapMaxCADD	eqtlMapSNPs	eqtlMapminP	eqtlMapminQ	eqtlMapts	eqtlDirection	ciMap	ciMapts
Knee arthroplasty
2	2	2	51108406	2:51108406:A:G	rs6727808	A	G	38.72	7.373	1.63002e-07	0.04539	rs6727808	NRXN1	intelligence [29942086], self reported educational attainment [27225129], self reported educational attainment [30038396], smoking status measurement [30643251], Alzheimer disease, Cognitive impairment [30514930], schizophrenia, intelligence, self reported educational attainment [31374203], FEV/FVC ratio, response to bronchodilator [26634245], FEV change measurement, trait in response to zileuton…	0	intronic	protein_coding	1.38	5	0.999949	-0.420818	14	15	ENSG00000179915	26	12.82	0					No
7	7	16	49531233	16:49531233:C:T	rs56279830	C	T	28.26	5.617	5.19797e-07	0.1589	rs56279830	ZNF423	BMI-adjusted waist-hip ratio [31669095], smoking status measurement [30643251], smoking initiation [30643251], self-reported educational attainment [30038396], smoking initiation [36477530], BMI-adjusted waist-hip ratio [25673412], smoking behavior, BMI-adjusted waist circumference [28443625], BMI-adjusted waist-hip ratio [30239722], waist-hip ratio [30239722], waist-hip ratio [30595370], waist-h…	0	intronic	protein_coding	1.718	5	0.990469	-0.0973538	4	15	ENSG00000102935	1	1.718	0					No
1	1	1	81970152	1:81970152:A:T	rs138265161	T	A	44.55	9.186	1.31086e-06	0.03631	rs138265161	LPHN2		0	intronic	protein_coding	7.273	5	1	0.222632	5	15	ENSG00000117114	5	16.75	0					No
8	8	20	48733167	20:48733167:G:T	rs367033	T	G	64.98	13.72	2.27991e-06	0.007564	rs367033	TMEM189-UBE2V1:TMEM189		0	intronic		1.684	3a			1	2
4	4	6	81600876	6:81600876:C:T	rs73476349	T	C	34.24	7.272	2.62112e-06	0.09304	rs73476349	RP11-486E2.1		333969	intergenic		5.577	7			7	15
5	5	10	96946413	10:96946413:C:T	rs634327	C	T	32.18	6.894	3.20172e-06	0.09531	rs634327	PAWRP1	response to xenobiotic stimulus [22952603], gut microbiome measurement [33462482]	2438	intergenic		0.058				5	15
3	3	3	36011338	3:36011338:A:C	rs73830005	C	A	35.43	7.667	3.9964e-06	0.07943	rs73830005	AC104308.2		97647	intergenic		1.929	7			1	15
6	6	12	95992744	12:95992744:A:G	rs145199303	G	A	42.07	9.172	4.72678e-06	0.05144	rs145199303	Y_RNA	gut microbiome measurement [32572223], attention deficit hyperactivity disorder, bipolar disorder [33686288], bipolar disorder [31043756], bipolar I disorder [34002096], bipolar disorder [34002096], schizophrenia [35396580], smoking initiation [36477530], gut microbiome measurement, breastfeeding duration [40187613], depressive symptom measurement, social risk factor [38063329], BMI-adjusted wais…	18720	intergenic		1.095	7			5	15
Hip arthroplasty
4	4	3	145406931	3:145406931:T:TG	rs151228165	TG	T	67.15	11.21	2.58426e-09	0.07867	rs151228165	GM2AP1	gut microbiome measurement, allergen exposure measurement [40187613]	4051	intergenic		0.423				14	15
2	2	2	204536592	2:204536592:G:T	rs116314843	G	T	59.28	10.21	7.59088e-09	0.07867	rs116314843	AC125238.3		305	downstream		0.084	7			5	15
10	10	14	38781838	14:38781838:A:C	rs74675802	A	C	59.13	11.25	1.6637e-07	0.05295	rs74675802	RP11-96D24.1		703	downstream		4.448	7			5	15
15	15	21	40466468	21:40466468:A:G	rs9808651	G	A	52.61	10.61	7.83564e-07	0.0348	rs9808651	RPL23AP12		33025	intergenic		7.285	4			2	15
5	5	4	125871132	4:125871132:C:T	rs115078029	C	T	47.77	9.668	8.55118e-07	0.08245	rs115078029	ANKRD50	response to darapladib, cardiovascular event measurement [28753643], opioid dependence [36207451]	237244	intergenic		0.812	7			5	15
3	3	2	238714650	2:238714650:A:G	rs80167458	A	G	55.74	11.31	9.07788e-07	0.05749	rs80167458	LRRFIP1:RBM44	gut microbiome measurement [32572223], obesity [23505185], opioid dependence [36207451]	00:00:00	intronic		5.753	6			14	15
12	12	17	68861019	17:68861019:C:T	rs145332305	T	C	55.59	11.32	9.89127e-07	0.05976	rs145332305	RP11-238F2.1		85647	intergenic		2.256	6			5	15
11	11	17	14696773	17:14696773:A:G	rs73278787	G	A	48.04	9.863	1.21896e-06	0.04614	rs73278787	AC005863.1		13252	intergenic		1.139	2b			5	15
16	16	22	29520632	22:29520632:C:G	rs6005998	G	C	54.18	11.26	1.64262e-06	0.05522	rs6005998	KREMEN1	BMI-adjusted waist-hip ratio [31669095], chronic kidney disease [31178898]	0	intronic	protein_coding	0.244		0.372972	-0.113279	4	5	ENSG00000183762	1	0.244	0					No
6	6	5	144901959	5:144901959:C:G	rs67441040	G	C	55.16	11.71	2.66552e-06	0.03631	rs67441040	PRELID2	response to interferon [30715261], smoking status measurement [30643251], response to radiation, Hematuria [31095341], acoustic startle blink response measurement [25387708]	0	intergenic	protein_coding	3.252	6	1.73074e-05	0.480158	5	15	ENSG00000186314	9	11.5	0					No
13	13	18	43251773	18:43251773:A:G	rs3786397	G	A	42.92	9.189	3.24677e-06	0.06203	rs3786397	SLC14A2:RP11-116O18.3	refractive error, self reported educational attainment [27020472], longitudinal BMI measurement, trait in response to amisulpride [32126890], self reported educational attainment [30038396], smoking initiation [36477530], heart rate variability measurement, response to antipsychotic drug [29064910], sleep quality [32399468], type 2 diabetes mellitus [38374256], gut microbiome measurement, breastf…	00:00:00	ncRNA_intronic		0.948				2	15
1	1	2	115092618	2:115092618:A:C	rs149331672	C	A	57.87	12.4	3.32049e-06	0.06581	rs149331672	snoU13		53865	intergenic		0.333	7			14	15
7	7	7	54176340	7:54176340:A:G	rs71546153	G	A	36.6	7.852	3.38698e-06	0.1392	rs71546153	RP11-806J6.1		160902	intergenic		1.212	5			5	15
14	14	19	46892719	19:46892719:C:G	rs576016595	G	C	45.81	9.859	3.64635e-06	0.01286	rs576016595	PPP5C	neuroticism measurement [29255261]	0	intronic	protein_coding	3.816		0.999093	-0.511732	4	4	ENSG00000011485	2	5.843	0					No
8	8	13	57008310	13:57008310:A:AT	rs147090992	AT	A	52.38	11.31	3.9197e-06	0.06278	rs147090992	snoU13		125447	intergenic		1.492				9	15
9	9	14	22351698	14:22351698:C:T	rs55977753	C	T	35.19	7.68	4.94257e-06	0.08396	rs55977753	TRAV12-2		4338	intergenic		2.919	7			5	15

## Sheet: ST5
Supplementary Table 5: Lead SNPs for suggestive loci in AMR ancestry														mapped trait in GWAS catalog [PMID]
No	GenomicLocus	chr	pos	uniqID	rsID	non_effect_allele	effect_allele	beta	se	gwasP	MAF	nearestGene	mapped trait in GWAS catalog [PMID]	dist	func	type	CADD	RDB	pLI	ncRVIS	minChrState	commonChrState	ensg	posMapSNPs	posMapMaxCADD	eqtlMapSNPs	eqtlMapminP	eqtlMapminQ	eqtlMapts	eqtlDirection	ciMap	ciMapts
Knee arthroplasty
1	1	9	140727259	9:140727259:A:ACT	rs144582153	ACT	A	51.95	10.8	1.64497e-06	0.05908	EHMT1	smoking initiation [36477530], gut microbiome measurement, allergen exposure measurement [40187613]	0	intronic	protein_coding	0.521		1	-1.02566	4	4	ENSG00000181090	7	4.515	0					No
2	2	10	6102012	10:6102012:C:T	rs12722489	C	T	41.8	8.379	6.79371e-07	0.06196	IL2RA	response to reverse transcriptase inhibitor, HIV-1 infection, peripheral neuropathy [24554482], type 2 diabetes mellitus [30572963], liver fibrosis measurement [32953199], type 1 diabetes mellitus [21829393], response to fenofibrate [22228203], type 1 diabetes mellitus [22293688], autoimmune thyroid disease, systemic lupus erythematosus, type 1 diabetes mellitus, ankylosing spondylitis, psoriasis…	0	intronic	protein_coding	0.643		0.881289	0.647289	1	15	ENSG00000134460	26	7.791	29	5.14361e-07	3.99159e-20	GTEx/v8/Adipose_Subcutaneous:GTEx/v8/Esophagus_Gastroesophageal_Junction:GTEx/v8/Heart_Atrial_Appendage:GTEx/v8/Muscle_Skeletal:GTEx/v8/Spleen	-	No
3	3	10	77929725	10:77929725:C:T	rs11001660	T	C	24.9	5.129	1.33513e-06	0.2435	C10orf11		0	intronic	protein_coding	1.296	5	0.0410566	0.0298164	5	15	ENSG00000148655	100	17.03	0					No
4	4	10	86958017	10:86958017:A:G	rs7094082	G	A	23.87	5.132	3.58099e-06	0.2594	RP11-181F12.1		302	upstream		6.202	6			9	15
5	5	13	53585185	13:53585185:A:G	rs55855022	G	A	33.83	6.885	9.89596e-07	0.1599	OLFM4	bipolar disorder, major depressive disorder [31926635], major depressive disorder [29942085], intelligence [29844566], autism spectrum disorder, major depressive disorder [30804558], major depressive disorder [29700475], obsessive-compulsive disorder, attention deficit hyperactivity disorder, Tourette syndrome, bipolar disorder, autism spectrum disorder, schizophrenia, anorexia nervosa, major dep…	17708	intergenic	protein_coding	1.299	4	2.41041e-06	0.814566	5	15	ENSG00000102837	0	0	4	6.56871e-07	4.54551e-11	GTEx/v8/Colon_Transverse:GTEx/v8/Pancreas	+	No
6	6	19	41751520	19:41751520:A:G	rs137991784	G	A	49.93	10.49	2.14452e-06	0.05187	AXL		0	intronic	protein_coding	3.09	7	0.766301	-0.0100703	4	4	ENSG00000167601	16	13.66	0					No
Hip arthroplasty
1	1	1	37541617	1:37541617:A:G	rs72653560	G	A	99.81	20.97	2.57001e-06	0.05764	GRIK3	FEV/FVC ratio, response to bronchodilator [26634245], bipolar disorder, major depressive disorder [31926635], neuroticism measurement [29942085], anxiety [29942085], neuroticism measurement [27067015], neuroticism measurement [27089181], neuroticism measurement [31972866], anxiety measurement [33859377], obsessive-compulsive disorder, attention deficit hyperactivity disorder, Tourette syndrome, b…	41886	intergenic	protein_coding	2.321	5	0.99998	-3.4481	5	15	ENSG00000163873	1	9.215	1	9.84725e-05	9.95357e-17	GTEx/v8/Lung		No
2	2	1	57839860	1:57839860:C:T	rs2052617	C	T	52.94	11.23	3.18046e-06	0.183	DAB1	sleep duration trait [30804565], smoking status measurement [30643251], brain attribute, neuroimaging measurement [32665545], response to ketamine [32724131], response to vaccine, cytokine measurement [22610502], sleep duration trait [30846698], self reported educational attainment [30038396], smoking initiation [36477530], gut microbiome measurement [33462482], response to tyrosine kinase inhibi…	0	intronic	protein_coding	3.307		0.981409	-0.32808	5	15	ENSG00000173406	47	12.84	35	5.46406e-11	7.80598e-12	GTEx/v8/Brain_Cerebellar_Hemisphere:GTEx/v8/Brain_Cerebellum	+	No
3	3	1	67005946	1:67005946:A:T	rs10493409	T	A	77.97	16.78	4.34071e-06	0.08934	SGIP1	type 2 diabetes mellitus [32541925], major depressive disorder [30718901], depressive symptom measurement [30643256], major depressive disorder [29662059], self reported educational attainment [30038396], smoking initiation [36477530], major depressive disorder [37985818], coffee consumption measurement, major depressive disorder [35898629], educational attainment [35361970], sleep duration trait…	0	intronic	protein_coding	2.161	6	0.999651	-0.315319	1	15	ENSG00000118473	2	10.34	0					No
4	4	2	50503807	2:50503807:A:T	rs13421566	A	T	89.49	17.38	3.83487e-07	0.06772	NRXN1	intelligence [29942086], self reported educational attainment [27225129], self reported educational attainment [30038396], smoking status measurement [30643251], Alzheimer disease, Cognitive impairment [30514930], schizophrenia, intelligence, self reported educational attainment [31374203], FEV/FVC ratio, response to bronchodilator [26634245], FEV change measurement, trait in response to zileuton…	0	intronic	protein_coding	2.195	7	0.999949	-0.420818	5	15	ENSG00000179915	56	14.19	0					No
5	5	2	106293855	2:106293855:A:C	rs77698625	C	A	56.42	11.9	2.80278e-06	0.147	NCK2	gut microbiome measurement, breastfeeding duration [40187613], gut microbiome measurement [33462482], brain attribute [34910505], gut microbiome measurement, allergen exposure measurement [40187613]	67498	intergenic	protein_coding	0.882	6	0.702843	0.533005	5	15	ENSG00000071051	0	0	29	4.76914e-05	3.47524e-17	GTEx/v8/Skin_Not_Sun_Exposed_Suprapubic:GTEx/v8/Skin_Sun_Exposed_Lower_leg	+	No
6	6	2	232504158	2:232504158:C:T	rs10200165	C	T	117.9	25.39	4.38812e-06	0.05043	RN7SL499P	intelligence [29942086], intelligence [29844566], smoking initiation [36477530], response to methotrexate, serum alanine aminotransferase measurement [36070248], attention deficit hyperactivity disorder, autism spectrum disorder, intelligence [35764056], gut microbiome measurement, allergen exposure measurement [40187613]	6552	intergenic		1.038	6			5	15
7	7	3	111167381	3:111167381:A:C	rs80184502	A	C	104.7	21.24	1.1432e-06	0.03602	CD96	response to TNF antagonist [31043678], smoking behavior trait [21685187], gut microbiome measurement [35115689], gut microbiome measurement, breastfeeding duration [40187613]	0	intronic	protein_coding	3.177	7	1.00321e-05	-0.130346	7	15	ENSG00000153283	6	3.5	0					No
8	8	4	59045580	4:59045580:C:T	rs1594748	C	T	62.05	13.08	2.7632e-06	0.1052	RP11-25L5.2		61343	intergenic		2.409				9	15
9	9	4	160891115	4:160891115:A:G	rs55848921	G	A	91.55	19.45	3.30393e-06	0.0317	RP11-6C14.1		192178	intergenic		0.042	6			5	15
10	10	5	152785080	5:152785080:A:G	rs77442856	G	A	101.4	18.57	7.66435e-08	0.06916	GRIA1	self reported educational attainment [30038396], schizophrenia [30285260], schizophrenia [26198764], forced expiratory volume, response to bronchodilator [26634245], major depressive disorder [38177345], microsatellite instability measurement, colorectal cancer, overall survival [25866641], lifestyle measurement, depressive symptom measurement [34877740], educational attainment [35361970], gut mi…	84094	intergenic	protein_coding	1.982	7	0.999436	-1.29549	5	15	ENSG00000155511	0	0	5	0.000261838	3.98647e-16	GTEx/v8/Nerve_Tibial	+	No
11	11	8	132716327	8:132716327:A:G	rs73708301	A	G	102.3	21.24	1.97841e-06	0.04179	CTD-2008O4.1		8431	intergenic		1.393	7			5	15
12	12	10	7208549	10:7208549:C:T	rs2762621	C	T	48.22	10.22	3.1081e-06	0.2435	SFMBT2	periprosthetic osteolysis, disease progression measurement [30794219], smoking initiation [36477530], event free survival time, urinary bladder cancer [34353775], opioid dependence [36207451], educational attainment [35361970], gut microbiome measurement, allergen exposure measurement [40187613]	0	intronic	protein_coding	3.815		0.996408	-0.148369	4	5	ENSG00000198879	10	3.815	13	1.27026e-06	5.50863e-28	GTEx/v8/Whole_Blood	+	No
13	12	10	7215982	10:7215982:C:T	rs72773845	C	T	121.4	20.08	2.97015e-09	0.04611	SFMBT2		0	intronic	protein_coding	2.537	5	0.996408	-0.148369	4	5	ENSG00000198879	10	3.815	13	1.27026e-06	5.50863e-28	GTEx/v8/Whole_Blood	+	No
14	13	10	19368604	10:19368604:C:T	rs79340054	T	C	89.38	18.16	1.18014e-06	0.0562	UBE2V2P1		27504	intergenic		4.525	6			4	15
15	14	10	66363308	10:66363308:A:T	rs12264195	T	A	105	22.67	4.65358e-06	0.04035	RPL17P35	opioid dependence [29478698], response to statin [20339536], schizophrenia [35396580]	16822	intergenic		1.97	7			9	15
16	15	11	9501274	11:9501274:G:T	rs11042382	G	T	78.74	16.4	2.11989e-06	0.06916	ZNF143	hip circumference [28552196], type 2 diabetes mellitus [38374256], migraine disorder, type 2 diabetes mellitus [36292730], gut microbiome measurement, allergen exposure measurement [40187613], skin cancer [39024449]	0	intronic	protein_coding	5.621	5	0.021967	-1.01552	4	4	ENSG00000166478	20	11.15	0					No
17	16	11	12638814	11:12638814:C:T	rs11022449	C	T	84.97	15.32	4.85035e-08	0.06628	TEAD1	intelligence [29844566], self reported educational attainment [27225129], cognitive function measurement [30038396], self reported educational attainment [30038396], gut microbiome measurement [33208821], schizophrenia, intelligence, self reported educational attainment [31374203], smoking initiation [36477530], self reported educational attainment [37106081], intelligence [29326435], self report…	57154	intergenic	protein_coding	6.47	5		-1.70212	7	15	ENSG00000187079	6	8.302	0					No
18	17	11	12920442	11:12920442:A:G	rs16911736	A	G	74.25	15.22	1.46004e-06	0.06628	TEAD1		0	intronic	protein_coding	4.799	7		-1.70212	4	5	ENSG00000187079	6	8.302	0					No
19	18	12	18821405	12:18821405:C:G	rs16914456	G	C	86.37	16.44	2.2379e-07	0.0879	PLCZ1		14697	intergenic	protein_coding	2.606	5	6.45114e-10	0.151831	4	15	ENSG00000139151	30	5.475	0					No
20	19	12	121146219	12:121146219:C:T	rs11065219	C	T	92.61	19.62	3.097e-06	0.05187	UNC119B	cognitive function measurement [39242605], type 2 diabetes mellitus [38374256]	2018	intergenic	protein_coding	0.844	1f	0.677325	0.550413	4	5	ENSG00000175970	3	9.71	2	0.000140134	5.2963e-07	GTEx/v8/Whole_Blood	+	No
21	20	13	28955081	13:28955081:C:T	rs1924453	T	C	102.5	20.23	5.74663e-07	0.04755	FLT1	acute respiratory distress syndrome [31982041], neuropsychological test [19734545], BMI-adjusted waist-hip ratio [30239722], BMI-adjusted waist-hip ratio [34021172]	0	intronic	protein_coding	3.018	5	0.997806	-0.783573	4	15	ENSG00000102755	23	9.656	0					No
22	21	13	78021568	13:78021568:C:T	rs6563008	C	T	206.4	36.42	2.48775e-08	0.02161	SCEL	BMI-adjusted waist-hip ratio [31669095], waist-hip ratio [30595370], age at onset, smoking initiation [24665060], gut microbiome measurement, breastfeeding duration [40187613], gastric cancer [39862296], gut microbiome measurement [40187613]	88240	intergenic		4.871	7			5	15
23	22	13	82087510	13:82087510:A:C	rs9601627	A	C	78.1	15.9	1.22954e-06	0.07637	PTMAP5	hippocampal volume [25625606], FEV/FVC ratio, response to bronchodilator [26634245], smoking initiation [36477530], hip circumference [28552196], educational attainment [35361970], gut microbiome measurement, breastfeeding duration [40187613], gut microbiome measurement, allergen exposure measurement [40187613], delivery measurement, gut microbiome measurement [40187613]	176535	intergenic		2.696	6			9	15
24	23	16	55435388	16:55435388:A:C	rs16954988	C	A	60.65	12.28	1.08557e-06	0.1138	MMP2	colorectal cancer [27207650], delivery measurement, gut microbiome measurement [40187613]	0	intronic	protein_coding	15.63	6	0.791258	0.337847	7	15	ENSG00000087245	7	15.63	0					No
25	24	18	66156903	18:66156903:A:G	rs9955947	A	G	95.61	20.52	4.12138e-06	0.0389	AKR1B10P2		32788	intergenic		1.181	4			1	15
26	25	19	550063	19:550063:A:C	rs111802828	A	C	108.6	22.42	1.72049e-06	0.03026	GZMM	depressive symptom measurement, response to antidepressant [36228427], gut microbiome measurement, allergen exposure measurement [40187613]	143	downstream	protein_coding	0.475	4	0.00121003	-0.0658549	2	5	ENSG00000197540	5	6.399	0					No
27	26	19	52222070	19:52222070:C:T	rs8099845	C	T	98.68	18.69	1.9627e-07	0.04755	HAS1		0	intronic	protein_coding	1.476	7	6.04486e-11	0.784682	1	13	ENSG00000105509	1	1.476	1	3.35752e-07	1.47567e-06	GTEx/v8/Brain_Cerebellar_Hemisphere:GTEx/v8/Brain_Cerebellum:GTEx/v8/Brain_Cortex	-	No
28	27	21	17322758	21:17322758:G:T	rs11702264	G	T	102.9	18.76	6.62706e-08	0.05476	USP25		70380	intergenic		1.898	7			9	15

## Sheet: ST6
Supplementary Table 6: Summary of genome-wide significant loci across all GWAS
	Cross Ancestry			EUR						AFR						AMR/HIS
				Knee			Hip			Knee			Hip			Knee			Hip
	Beta	SE	P	Beta	SE	P	Beta	SE	P	Beta	SE	P	Beta	SE	P	Beta	SE	P	Beta	SE	P
rs116314843	0.01758	0.02777	0.527	3.79772	6.66848	0.569024	-19.0612	11.0993	0.0859638	-9.79292	7.8067	0.2098	59.2825	10.2089	7.59e-09
rs151228165	0.1409	0.04438	0.001499							-6.56325	9.16707	0.47408	67.1487	11.213	2.58e-09
rs72773845	0.01656	0.01861	0.3734	2.52954	3.44686	0.463042	-3.76806	5.25825	0.473646							-7.313	10.8	0.498256	121.394	20.0768	2.97e-09
rs11022449	0.008254	0.01418	0.5609	0.400551	2.87496	0.889196	-7.12632	4.3704	0.103024	-8.9475	6.81688	0.18945	27.7543	8.4642	0.00106295	5.294	8.912	0.552572	84.9723	15.3241	4.85e-08
rs6563008	0.1026	0.02967	0.0005435							3.54329	5.69506	0.533886	11.1728	6.97454	0.109355	27.78	20.38	0.173122	206.428	36.4187	2.49e-08

## Sheet: ST7
Supplementary Table 7: MAGMA gene set tissue enrichment analysis in BrainSpan and GTeX data
VARIABLE	NGENES	BETA	BETA_STD	SE	P	VARIABLE	NGENES	BETA	BETA_STD	SE	P	VARIABLE	NGENES	BETA	BETA_STD	SE	P	VARIABLE	NGENES	BETA	BETA_STD	SE	P
21_pcw	13994	0.0011991	0.029495	0.00063902	0.030308	Early_infancy	13547	0.089397	0.1264	0.029154	0.0010858	Brain_Anterior_cingulate_cortex_BA24	17096	0.010379	0.018282	0.0072763	0.076877	Bladder	17096	0.021982	0.042695	0.016367	0.08964
16_pcw	13994	0.00081453	0.020593	0.0005612	0.073347	Late_infancy	13547	0.033232	0.048361	0.020883	0.055775	Brain_Frontal_Cortex_BA9	17096	0.0086153	0.015826	0.0069252	0.10675	Kidney	17096	0.012643	0.022186	0.0095625	0.093074
17_pcw	13994	0.00087215	0.021346	0.00061561	0.078293	Late_prenatal	13547	0.0085196	0.01168	0.016234	0.29987	Cells_Cultured_fibroblasts	17096	0.0072331	0.015476	0.0065848	0.13601	Adrenal_Gland	17096	0.011981	0.023077	0.010489	0.12668
13_pcw	13994	0.00057906	0.016096	0.00045697	0.10256	Early_childhood	13547	0.0019805	0.0027609	0.01445	0.44549	Brain_Amygdala	17096	0.008265	0.014039	0.0078903	0.14745	Heart	17096	0.0096823	0.016628	0.0097134	0.15944
19_pcw	13994	0.00054814	0.016181	0.0004518	0.11253	Late_childhood	13547	0.0021887	0.0032174	0.019006	0.45416	Kidney_Cortex	17096	0.0093261	0.016344	0.0090671	0.15185	Brain	17096	0.0059972	0.010383	0.0069368	0.19365
12_pcw	13994	0.00047384	0.012633	0.00047949	0.16153	Middle_adulthood	13547	-0.00038705	-0.00057351	0.015655	0.50986	Heart_Atrial_Appendage	17096	0.0092861	0.016635	0.0096945	0.16907	Spleen	17096	0.0054719	0.010814	0.0079818	0.2465
24_pcw	13994	0.00046651	0.013472	0.00054526	0.19612	Late_mid-prenatal	13547	-0.0069053	-0.010217	0.014101	0.68782	Brain_Hypothalamus	17096	0.0077522	0.013298	0.0081312	0.1702	Esophagus	17096	0.01112	0.020879	0.017366	0.26098
37_pcw	13994	0.00031026	0.0091952	0.00056146	0.29028	Adolescence	13547	-0.010635	-0.014962	0.020569	0.69743	Brain_Hippocampus	17096	0.007316	0.01235	0.0080335	0.18124	Skin	17096	0.0036309	0.006901	0.010167	0.3605
2_yrs	13994	0.00028094	0.0058745	0.00056669	0.31003	Early_mid-prenatal	13547	-0.0060252	-0.0090362	0.011317	0.70276	Brain_Cortex	17096	0.0063539	0.011552	0.0071936	0.18855	Testis	17096	0.00099045	0.0017022	0.0056271	0.43014
26_pcw	13994	0.00034424	0.0070035	0.00093478	0.35634	Early_prenatal	13547	-0.0076031	-0.011437	0.0099037	0.77866	Brain_Cerebellar_Hemisphere	17096	0.0053478	0.010707	0.006153	0.19239	Vagina	17096	0.0012187	0.0023209	0.012847	0.46221
15_yrs	13994	0.00017034	0.0039119	0.00081091	0.41681	Young_adulthood	13547	-0.015118	-0.021476	0.018715	0.79039	Brain_Cerebellum	17096	0.0053125	0.010519	0.0063418	0.20111	Prostate	17096	0.001292	0.0024414	0.014142	0.4636
1_yrs	13994	3.0377e-05	0.00069399	0.00081561	0.48515							Adrenal_Gland	17096	0.0080468	0.015499	0.010166	0.21432	Cervix_Uteri	17096	0.00067293	0.0013169	0.014324	0.48127
8_pcw	13994	-1.7805e-05	-0.00050329	0.00039783	0.51785							Bladder	17096	0.0087926	0.017078	0.013263	0.25369	Liver	17096	4.2699e-05	7.6793e-05	0.0065921	0.49742
18_yrs	13994	-0.00010397	-0.0021878	0.00078263	0.55284							Kidney_Medulla	17096	0.0052344	0.009649	0.0093708	0.28823	Fallopian_Tube	17096	-0.00080361	-0.0015529	0.014018	0.52286
3_yrs	13994	-0.00011014	-0.0027139	0.00065834	0.56643							Heart_Left_Ventricle	17096	0.004321	0.007201	0.0092068	0.31942	Stomach	17096	-0.0019961	-0.0036149	0.013861	0.55725
9_pcw	13994	-8.0729e-05	-0.0019163	0.00047952	0.56685							Esophagus_Mucosa	17096	0.0032711	0.0063041	0.0076949	0.33538	Uterus	17096	-0.002153	-0.0043726	0.012058	0.57085
36_yrs	13994	-0.00040413	-0.0084824	0.00089764	0.67372							Spleen	17096	0.0031122	0.0061507	0.0074179	0.33741	Muscle	17096	-0.0013953	-0.0026366	0.006962	0.57942
40_yrs	13994	-0.00052335	-0.014455	0.00069284	0.77498							Brain_Caudate_basal_ganglia	17096	0.0030009	0.0051674	0.0079217	0.35241	Thyroid	17096	-0.0024131	-0.0047622	0.010948	0.58722
37_yrs	13994	-0.00074732	-0.015938	0.00086588	0.80594							Brain_Nucleus_accumbens_basal_ganglia	17096	0.0019113	0.003306	0.007654	0.40141	Blood_Vessel	17096	-0.0026451	-0.0053537	0.011887	0.58804
23_yrs	13994	-0.00082297	-0.017966	0.00093032	0.81181							Brain_Substantia_nigra	17096	0.0017037	0.0029244	0.0085815	0.42131	Salivary_Gland	17096	-0.0032646	-0.0060541	0.010966	0.61703
21_yrs	13994	-0.00069945	-0.016198	0.00078784	0.81267							Brain_Putamen_basal_ganglia	17096	0.001043	0.0017699	0.0079839	0.44803	Pituitary	17096	-0.0030249	-0.0056162	0.0083947	0.6407
19_yrs	13994	-0.00065626	-0.016686	0.00070203	0.82505							Testis	17096	0.00036977	0.0006355	0.0056196	0.47377	Nerve	17096	-0.0042832	-0.0085889	0.010483	0.65858
13_yrs	13994	-0.000849	-0.019133	0.00089429	0.82877							Liver	17096	-0.00097429	-0.0017522	0.0063736	0.56075	Colon	17096	-0.0081725	-0.015243	0.015893	0.69644
4_mos	13994	-0.0011257	-0.029209	0.001151	0.83596							Brain_Spinal_cord_cervical_c-1	17096	-0.0018258	-0.0032716	0.0085997	0.58407	Small_Intestine	17096	-0.0063763	-0.011679	0.010861	0.72143
11_yrs	13994	-0.00085888	-0.022204	0.0007599	0.87081							Artery_Tibial	17096	-0.002197	-0.004513	0.01009	0.58618	Blood	17096	-0.0040363	-0.0072451	0.0062501	0.74079
10_mos	13994	-0.00083833	-0.024658	0.00070583	0.88252							Vagina	17096	-0.002894	-0.0055112	0.011096	0.60288	Adipose_Tissue	17096	-0.0091797	-0.017973	0.013495	0.75182
4_yrs	13994	-0.0005864	-0.019092	0.00048874	0.88488							Esophagus_Muscularis	17096	-0.0033156	-0.006523	0.012435	0.60512	Lung	17096	-0.008882	-0.017105	0.010764	0.79536
30_yrs	13994	-0.00076795	-0.022057	0.00058409	0.9057							Prostate	17096	-0.0035498	-0.0067077	0.012148	0.61493	Breast	17096	-0.013712	-0.02628	0.016024	0.80391
8_yrs	13994	-0.0016532	-0.047335	0.0007788	0.98311							Cervix_Ectocervix	17096	-0.0037231	-0.0072706	0.012173	0.62013	Ovary	17096	-0.0090488	-0.018291	0.010378	0.80837
												Skin_Not_Sun_Exposed_Suprapubic	17096	-0.002751	-0.005288	0.0077478	0.63873	Pancreas	17096	-0.0079086	-0.013202	0.0087403	0.81722
												Cervix_Endocervix	17096	-0.0042844	-0.0084483	0.01159	0.64418
												Muscle_Skeletal	17096	-0.0027977	-0.0052866	0.0069787	0.65575
												Esophagus_Gastroesophageal_Junction	17096	-0.0051891	-0.010187	0.012828	0.65708
												Fallopian_Tube	17096	-0.0050031	-0.0096682	0.011903	0.66287
												Stomach	17096	-0.0059092	-0.010701	0.012161	0.68648
												Thyroid	17096	-0.0048724	-0.0096155	0.0097607	0.69117
												Uterus	17096	-0.005695	-0.011566	0.010919	0.699
												Skin_Sun_Exposed_Lower_leg	17096	-0.0041012	-0.0079318	0.0077633	0.70134
												Minor_Salivary_Gland	17096	-0.0053096	-0.0098465	0.0096959	0.70802
												Cells_EBV-transformed_lymphocytes	17096	-0.0031748	-0.0069234	0.0048918	0.74183
												Pituitary	17096	-0.005855	-0.010871	0.0090134	0.74201
												Colon_Sigmoid	17096	-0.0084025	-0.016387	0.01257	0.74807
												Artery_Coronary	17096	-0.0083797	-0.016633	0.012	0.75751
												Whole_Blood	17096	-0.0040453	-0.0073056	0.0056614	0.76255
												Nerve_Tibial	17096	-0.0072696	-0.014578	0.010099	0.76418
												Small_Intestine_Terminal_Ileum	17096	-0.0076361	-0.013986	0.009612	0.78652
												Colon_Transverse	17096	-0.0098165	-0.017983	0.011614	0.801
												Adipose_Subcutaneous	17096	-0.0097078	-0.019325	0.010799	0.81565
												Adipose_Visceral_Omentum	17096	-0.010326	-0.019998	0.011242	0.82082
												Artery_Aorta	17096	-0.010159	-0.02068	0.010315	0.83765
												Lung	17096	-0.0092628	-0.017839	0.0093164	0.83994
												Breast_Mammary_Tissue	17096	-0.01373	-0.026314	0.012719	0.85979
												Pancreas	17096	-0.0090463	-0.015101	0.008375	0.85996
												Ovary	17096	-0.010969	-0.022173	0.0097111	0.87066

## Sheet: ST8
Supplementary Table 8: Phenome-wide association with Phecodes in the Yale-Penn sample EUR and AFR samples
				EUR ancestry											AFR ancestry
							Knee				Hip							knee				hip
description	group	phenotype	type	n_total	n_cases	n_controls	beta	SE	OR	p	beta	SE	OR	p	n_total	n_cases	n_controls	beta	SE	OR	p	beta	SE	OR	p
Staphylococcus infections	infectious diseases	41.1	logistic	25523	275	25248	0.235	0.061	1.265	0.000102	-0.002	0.06	0.998	0.978	8292	133	8159	0.098321	0.0911248	1.10332	0.280601	0.127137	0.0924444	1.13557	0.169043
Major depressive disorder	mental disorders	296.22	logistic	21023	1759	19264	0.092	0.025	1.097	0.000233	-0.027	0.025	0.973	0.281	6921	1187	5734	-0.0310402	0.0330616	0.969437	0.347803	0.039882	0.0337927	1.04069	0.237923
Mood disorders	mental disorders	296	logistic	22339	3075	19264	0.066	0.02	1.068	0.000737	-0.001	0.02	0.999	0.94	7636	1902	5734	-0.0193848	0.0273756	0.980802	0.478879	0.0391616	0.0280476	1.03994	0.162638
Hemangioma of skin and subcutaneous tissue	neoplasms	228.1	logistic	28382	24	28358	-0.668	0.208	0.513	0.00132	0.281	0.203	1.324	0.167	10189	1	10188	NA	NA	NA	NA	NA	NA	NA	NA
Depression	mental disorders	296.2	logistic	21980	2716	19264	0.066	0.021	1.068	0.00141	-0.001	0.021	0.999	0.953	7400	1666	5734	-0.0165882	0.0288295	0.983549	0.565028	0.0361406	0.0295173	1.0368	0.220806
Anxiety disorders	mental disorders	300	logistic	22572	3308	19264	0.061	0.019	1.063	0.00141	-0.02	0.019	0.98	0.304	7045	1311	5734	-0.0449338	0.0316948	0.956061	0.156278	-0.0056212	0.0323448	0.994395	0.862031
Other anemias	hematopoietic	285	logistic	23778	3697	20081	0.058	0.018	1.059	0.00157	-0.008	0.018	0.992	0.66	7898	2697	5201	0.000853606	0.0251382	1.00085	0.972912	-0.018374	0.0253923	0.981794	0.469307
Methicillin resistant Staphylococcus aureus	infectious diseases	41.12	logistic	25371	123	25248	0.276	0.09	1.318	0.00221	-0.015	0.09	0.985	0.87	8217	58	8159	0.193824	0.136951	1.21388	0.156987	0.352633	0.138269	1.42281	0.0107618
Infection/inflammation of internal prosthetic device; implant; and graft	infectious diseases	81	logistic	27857	190	27667	0.21	0.072	1.234	0.00368	-0.006	0.073	0.994	0.929	9759	85	9674	-0.0446302	0.111671	0.956351	0.689408	0.143045	0.113585	1.15378	0.2079
Adrenal cortical steroids causing adverse effects in therapeutic use	injuries & poisonings	962.1	logistic	22813	185	22628	0.209	0.074	1.232	0.00465	-0.063	0.074	0.939	0.394	7620	59	7561	-0.190305	0.134481	0.826707	0.157037	-0.0118513	0.136947	0.988219	0.931038
Hemorrhage NOS	circulatory system	459.1	logistic	23762	45	23717	0.414	0.149	1.513	0.00546	0.077	0.149	1.08	0.606	7479	19	7460	NA	NA	NA	NA	NA	NA	NA	NA
Anomalies of jaw size/symmetry	digestive	526.3	logistic	27594	20	27574	0.625	0.225	1.869	0.00546	0.19	0.224	1.21	0.395	8819	7	8812	NA	NA	NA	NA	NA	NA	NA	NA
Anxiety disorder	mental disorders	300.1	logistic	22160	2896	19264	0.055	0.02	1.057	0.00613	-0.014	0.02	0.986	0.479	6812	1078	5734	-0.063961	0.0342492	0.938042	0.061829	-0.0107518	0.0351287	0.989306	0.759552
Emphysema	respiratory	496.1	logistic	23387	464	22923	-0.127	0.047	0.88	0.00692	0.056	0.047	1.058	0.232	7303	261	7042	-0.00947364	0.0659218	0.990571	0.885729	0.0548647	0.0665081	1.0564	0.40941
Cardiac conduction disorders	circulatory system	426	logistic	19336	4174	15162	0.048	0.018	1.049	0.00875	-0.02	0.018	0.98	0.284	6704	1413	5291	0.0144575	0.0321674	1.01456	0.65311	0.0148299	0.0324436	1.01494	0.647601
Type 1 diabetes with neurological manifestations	endocrine/metabolic	250.14	logistic	20534	75	20459	0.301	0.116	1.351	0.00921	-0.043	0.115	0.958	0.709	5511	42	5469	0.216958	0.165856	1.24229	0.190835	0.142558	0.166868	1.15322	0.39293
Myopia	sense organs	367.1	logistic	27013	630	26383	-0.104	0.04	0.901	0.0104	0.01	0.04	1.01	0.809	8593	368	8225	-0.0511245	0.0548587	0.95016	0.351373	-0.0573375	0.0562465	0.944275	0.308015
Tinnitus	sense organs	389.4	logistic	26248	578	25670	0.108	0.042	1.114	0.0104	-0.015	0.042	0.985	0.719	9255	207	9048	-0.128326	0.0727498	0.879567	0.0777427	-0.061421	0.0736017	0.940427	0.403997
Ovarian cyst	genitourinary	628	logistic	25708	321	25387	-0.147	0.058	0.863	0.0106	0.005	0.057	1.005	0.933	7684	264	7420	0.130233	0.0672799	1.13909	0.0529063	0.014463	0.068782	1.01457	0.833455
Disorders of lacrimal system	sense organs	375	logistic	26647	215	26432	-0.177	0.069	0.838	0.0108	0.181	0.069	1.199	0.00853	8467	144	8323	-0.0619795	0.0861647	0.939902	0.471947	-0.119608	0.0882777	0.887268	0.175447
Ileostomy status	digestive	559	logistic	21061	169	20892	0.197	0.077	1.218	0.011	-0.043	0.077	0.958	0.574	6512	37	6475	0.248565	0.170529	1.28218	0.144948	-0.347849	0.172016	0.706206	0.0431575
Nonspecific findings on examination of blood	symptoms	790	logistic	26862	815	26047	-0.09	0.036	0.914	0.012	-0.021	0.036	0.979	0.552	9036	535	8501	-0.0685581	0.0460128	0.933739	0.13623	0.0189324	0.0465786	1.01911	0.684405
Viral infection	infectious diseases	79	logistic	25304	585	24719	0.103	0.042	1.108	0.0135	-0.038	0.042	0.963	0.36	7678	422	7256	-0.00429514	0.0514571	0.995714	0.933478	0.0531075	0.0525404	1.05454	0.312115
Postoperative infection	infectious diseases	80	logistic	27966	299	27667	0.141	0.058	1.152	0.0151	0.055	0.058	1.057	0.34	9793	119	9674	-0.104875	0.0960143	0.900437	0.274709	0.201164	0.0974615	1.22283	0.0390139
Obesity	endocrine/metabolic	278.1	logistic	25835	5438	20397	0.037	0.015	1.038	0.0157	-0.029	0.015	0.971	0.0576	8848	4043	4805	-0.0140794	0.0223427	0.986019	0.528592	0.0164959	0.0227077	1.01663	0.467566
Hypertensive chronic kidney disease	circulatory system	401.22	logistic	14789	1350	13439	0.071	0.03	1.074	0.0162	0.004	0.03	1.004	0.888	4615	1128	3487	0.0594205	0.0425053	1.06122	0.162127	0.0565596	0.0437608	1.05819	0.196194
Wegener's granulomatosis	circulatory system	446.4	logistic	22950	53	22897	0.331	0.138	1.392	0.0166	0.205	0.138	1.227	0.138	8416	5	8411	NA	NA	NA	NA	NA	NA	NA	NA
Atrioventricular block, complete	circulatory system	426.24	logistic	15641	479	15162	0.11	0.047	1.117	0.018	-0.015	0.047	0.985	0.75	5386	95	5291	0.0748314	0.104375	1.0777	0.473405	0.101336	0.107323	1.10665	0.345059
Supraventricular premature beats	circulatory system	427.61	logistic	15333	171	15162	-0.182	0.077	0.834	0.0182	-0.013	0.076	0.987	0.864	5342	51	5291	0.0903896	0.142867	1.0946	0.526941	0.0320138	0.145932	1.03253	0.826359
Epiphora	sense organs	375.2	logistic	26473	41	26432	-0.37	0.157	0.691	0.0185	0.267	0.158	1.305	0.0906	8350	27	8323	-0.000602999	0.198898	0.999397	0.997581	-0.208129	0.202758	0.812102	0.30466
Acute cystitis	genitourinary	592.11	logistic	23359	72	23287	-0.275	0.119	0.76	0.0207	-0.062	0.119	0.94	0.605	6944	52	6892	0.110454	0.140174	1.11679	0.43071	0.134649	0.142064	1.14414	0.34323
Bacterial infection NOS	infectious diseases	41	logistic	26409	1161	25248	0.069	0.03	1.072	0.0209	-0.043	0.03	0.958	0.152	8827	668	8159	0.0482732	0.0418072	1.04946	0.248229	0.00106366	0.0424177	1.00106	0.979994
Pneumonia due to fungus (mycoses)	respiratory	480.3	logistic	24951	35	24916	0.385	0.168	1.47	0.0218	0.012	0.17	1.012	0.944	7947	17	7930	NA	NA	NA	NA	NA	NA	NA	NA
Encounter for long-term (current) use of antibiotics	infectious diseases	980	logistic	28783	76	28707	0.262	0.115	1.3	0.0223	-0.029	0.115	0.971	0.8	10137	35	10102	-0.138241	0.177362	0.870889	0.435726	0.0308682	0.178493	1.03135	0.8627
Abnormality in fetal heart rate or rhythm	pregnancy complications	655.1	logistic	28305	82	28223	0.256	0.113	1.292	0.0229	-0.138	0.113	0.871	0.223	9475	135	9340	-0.0154236	0.0941876	0.984695	0.869925	0.021032	0.0955065	1.02125	0.825703
Cardiac shunt/ heart septal defect	congenital anomalies	747.11	logistic	27517	435	27082	0.11	0.048	1.116	0.0234	0.01	0.049	1.01	0.839	9956	79	9877	-0.167691	0.113648	0.845615	0.140069	-0.0768619	0.11719	0.926018	0.511904
Insomnia	neurological	327.4	logistic	22405	1014	21391	0.072	0.032	1.075	0.0256	-0.023	0.032	0.977	0.475	6981	583	6398	-0.00115922	0.0448821	0.998841	0.979394	0.0462787	0.0455711	1.04737	0.309854
Methicillin sensitive Staphylococcus aureus	infectious diseases	41.11	logistic	25340	92	25248	0.233	0.104	1.262	0.0258	0.049	0.104	1.05	0.64	8203	44	8159	0.114897	0.157896	1.12176	0.466814	0.0375372	0.159202	1.03825	0.813601
Morbid obesity	endocrine/metabolic	278.11	logistic	22257	1860	20397	0.054	0.024	1.056	0.0258	-0.075	0.024	0.927	0.00193	6962	2157	4805	-0.00395507	0.0274814	0.996053	0.885565	0.0391527	0.0281127	1.03993	0.16371
Disorders of refraction and accommodation; blindness and low vision	sense organs	367	logistic	28160	1777	26383	-0.054	0.025	0.947	0.0274	0.028	0.025	1.029	0.247	9533	1308	8225	0.00970089	0.031354	1.00975	0.757018	0.0199476	0.0317476	1.02015	0.529795
Hypertensive heart and/or renal disease	circulatory system	401.2	logistic	15409	1970	13439	0.057	0.026	1.058	0.0276	-0.01	0.026	0.991	0.713	5098	1611	3487	0.069716	0.0383888	1.0722	0.0693627	0.0769879	0.0395712	1.08003	0.0517081
Hematuria	genitourinary	593	logistic	24777	1490	23287	-0.06	0.027	0.942	0.0276	-0.01	0.027	0.99	0.718	7691	799	6892	0.00806199	0.0388065	1.00809	0.835425	-0.00891067	0.0393672	0.991129	0.820931
Bullous dermatoses	dermatologic	695.2	logistic	24227	23	24204	-0.467	0.212	0.627	0.0276	0.08	0.208	1.084	0.699	8035	13	8022	NA	NA	NA	NA	NA	NA	NA	NA
Acquired coagulation factor deficiency	hematopoietic	286.4	logistic	20769	28	20741	-0.415	0.189	0.66	0.0283	0.033	0.189	1.034	0.862	7983	10	7973	NA	NA	NA	NA	NA	NA	NA	NA
Type 2 diabetes	endocrine/metabolic	250.2	logistic	24492	4033	20459	0.039	0.018	1.039	0.0289	-0.031	0.018	0.969	0.0762	8459	2990	5469	0.00728663	0.0250812	1.00731	0.771417	0.0208106	0.0252899	1.02103	0.410576
Regional enteritis	digestive	555.1	logistic	21251	359	20892	-0.117	0.054	0.889	0.0293	0.076	0.053	1.079	0.154	6542	67	6475	0.0313125	0.125275	1.03181	0.802626	0.0761714	0.128021	1.07915	0.55185
Iron deficiency anemias, unspecified or not due to blood loss	hematopoietic	280.1	logistic	21112	1031	20081	0.07	0.032	1.073	0.0295	0.009	0.032	1.009	0.773	6153	952	5201	-0.0177408	0.0371477	0.982416	0.632952	0.0104911	0.0375818	1.01055	0.780127
Postinflammatory pulmonary fibrosis	respiratory	502	logistic	24349	339	24010	0.119	0.055	1.127	0.0295	-0.005	0.055	0.995	0.927	8254	94	8160	0.00997844	0.105688	1.01003	0.92478	-0.0308435	0.107216	0.969627	0.773594
Malignant neoplasm of other and ill-defined sites within the digestive organs and peritoneum	neoplasms	159	logistic	26128	175	25953	-0.164	0.076	0.849	0.0317	-0.059	0.076	0.943	0.436	9471	42	9429	-0.166056	0.154555	0.846999	0.282638	0.0664093	0.159746	1.06866	0.677616
Chronic pain syndrome	neurological	355.1	logistic	26310	91	26219	0.226	0.106	1.254	0.0321	0.052	0.105	1.054	0.617	8467	128	8339	-0.0295434	0.0909335	0.970889	0.745264	-0.0470083	0.0928503	0.954079	0.61266
Complex regional/central pain syndrome	neurological	355	logistic	26334	115	26219	0.201	0.094	1.223	0.0325	0.167	0.093	1.181	0.0739	8471	132	8339	-0.00838128	0.0893512	0.991654	0.925267	-0.0645217	0.0912049	0.937516	0.479295
Rupture of tendon, nontraumatic	musculoskeletal	727.6	logistic	23634	161	23473	-0.17	0.08	0.844	0.0325	-0.116	0.079	0.891	0.144	6857	124	6733	0.0423988	0.0945268	1.04331	0.653766	-0.0412948	0.0955873	0.959546	0.665733
Cardiac pacemaker in situ	circulatory system	426.91	logistic	16240	1078	15162	0.069	0.032	1.072	0.0327	0.002	0.033	1.002	0.942	5502	211	5291	0.0778901	0.0735093	1.081	0.289329	0.0259182	0.0745299	1.02626	0.728024
Primary hypercoagulable state	hematopoietic	286.81	logistic	20884	143	20741	0.179	0.084	1.196	0.0329	-0.095	0.084	0.909	0.257	8048	75	7973	-0.0142921	0.120307	0.98581	0.905436	0.0244894	0.12173	1.02479	0.84056
Torsion dystonia	neurological	333.4	logistic	25033	53	24980	0.293	0.138	1.341	0.0335	0.009	0.138	1.009	0.946	8389	20	8369	0.189072	0.232839	1.20813	0.416776	0.025224	0.235851	1.02554	0.914829
Hypermetropia	sense organs	367.8	logistic	26586	203	26383	-0.151	0.071	0.86	0.0341	-0.05	0.071	0.951	0.476	8406	181	8225	0.108139	0.0785935	1.1142	0.168846	0.0331277	0.0803937	1.03368	0.680289
Fracture of pelvis	injuries & poisonings	802	logistic	26926	68	26858	-0.258	0.122	0.773	0.0347	0.088	0.122	1.092	0.471	9099	19	9080	NA	NA	NA	NA	NA	NA	NA	NA
Hemiplegia	neurological	342	logistic	25032	52	24980	0.293	0.139	1.341	0.0349	-0.007	0.139	0.993	0.957	8423	54	8369	-0.193278	0.141945	0.824252	0.173311	0.133692	0.144248	1.14304	0.354018
Coagulation defects	hematopoietic	286	logistic	23070	2329	20741	0.047	0.022	1.048	0.0355	-0.01	0.022	0.99	0.65	8794	821	7973	0.0164327	0.0383162	1.01657	0.668017	0.0491205	0.0386671	1.05035	0.203962
Hypercoagulable state	hematopoietic	286.8	logistic	20888	147	20741	0.174	0.083	1.19	0.0356	-0.112	0.083	0.894	0.175	8050	77	7973	-0.0159221	0.118564	0.984204	0.893173	0.0132424	0.119948	1.01333	0.912091
Atrial flutter	circulatory system	427.22	logistic	17114	1952	15162	0.053	0.025	1.054	0.0359	-0.033	0.025	0.967	0.182	5642	351	5291	0.128584	0.0578755	1.13722	0.0263009	-0.0376251	0.0587213	0.963074	0.521691
Cardiac pacemaker/device in situ	circulatory system	426.9	logistic	17641	2479	15162	0.047	0.022	1.048	0.0365	-0.035	0.023	0.966	0.125	5958	667	5291	0.0346134	0.0434089	1.03522	0.425229	0.0314838	0.0438748	1.03198	0.473015
Extrinsic allergic alveolitis	respiratory	500.1	logistic	24044	34	24010	-0.357	0.172	0.699	0.0376	-0.128	0.171	0.88	0.456	8165	5	8160	NA	NA	NA	NA	NA	NA	NA	NA
Memory loss	mental disorders	292.3	logistic	25853	448	25405	-0.099	0.048	0.905	0.0385	0.025	0.048	1.025	0.601	8551	181	8370	0.0045999	0.0772777	1.00461	0.952535	-0.0181457	0.0780882	0.982018	0.816247
Gastrojejunal ulcer	digestive	531.5	logistic	28266	26	28240	0.406	0.197	1.5	0.0393	-0.061	0.197	0.941	0.756	9825	18	9807	NA	NA	NA	NA	NA	NA	NA	NA
Nausea and vomiting	symptoms	789	logistic	26312	1718	24594	0.052	0.025	1.053	0.0395	0.037	0.025	1.037	0.146	8587	1604	6983	0.00853767	0.0290549	1.00857	0.768876	0.039884	0.0291884	1.04069	0.171803
Bariatric surgery	digestive	539	logistic	26499	2062	24437	0.047	0.023	1.048	0.0417	-0.026	0.023	0.975	0.264	9246	1139	8107	-0.0316847	0.0328928	0.968812	0.335412	-0.01861	0.0334508	0.981562	0.577978
Secondary diabetes mellitus	endocrine/metabolic	249	logistic	21061	602	20459	0.084	0.041	1.088	0.0419	-0.063	0.041	0.939	0.125	5829	360	5469	0.0230226	0.0573537	1.02329	0.688115	-0.000600949	0.0580931	0.999399	0.991746
Cramp of limb	symptoms	771.2	logistic	26229	52	26177	0.28	0.139	1.324	0.043	0.097	0.139	1.102	0.486	7695	101	7594	-0.0413323	0.104175	0.95951	0.691546	-0.00577633	0.105867	0.99424	0.956487
Migraine	neurological	340	logistic	26810	958	25852	0.068	0.033	1.07	0.0432	0.046	0.033	1.047	0.172	8703	595	8108	-0.0027526	0.0443739	0.997251	0.950537	-0.118658	0.0455475	0.888112	0.00918367
Hyperhidrosis	dermatologic	705.8	logistic	26112	191	25921	-0.147	0.073	0.863	0.0438	0.076	0.073	1.079	0.292	8447	129	8318	0.0075861	0.0913596	1.00761	0.933823	-0.0316177	0.0922973	0.968877	0.731927
Mild cognitive impairment	mental disorders	292.2	logistic	25484	79	25405	-0.229	0.114	0.795	0.0448	0.052	0.113	1.053	0.646	8397	27	8370	0.150334	0.198079	1.16222	0.447877	-0.163746	0.199258	0.848957	0.411201
Atherosclerosis of aorta	circulatory system	440.9	logistic	23030	133	22897	-0.175	0.088	0.839	0.0454	0.057	0.087	1.059	0.51	8433	22	8411	-0.197158	0.21916	0.821061	0.368329	-0.0728206	0.219368	0.929768	0.739922
Noninflammatory disorders of vulva and perineum	genitourinary	619.5	logistic	27660	63	27597	0.253	0.127	1.288	0.046	-0.035	0.128	0.966	0.787	8521	44	8477	-0.261209	0.156508	0.77012	0.0951214	0.0827088	0.159766	1.08623	0.604676
Malignant neoplasm of ovary	neoplasms	184.11	logistic	24835	138	24697	-0.173	0.087	0.841	0.0465	0.096	0.086	1.101	0.267	8361	29	8332	-0.211038	0.19201	0.809743	0.271725	0.230444	0.196957	1.25916	0.241993
Hypercalcemia	endocrine/metabolic	275.6	logistic	25531	305	25226	-0.115	0.058	0.891	0.0468	0.011	0.058	1.011	0.846	8579	206	8373	-0.0831022	0.0736063	0.920257	0.258894	-0.00835874	0.0742437	0.991676	0.910359
Cutaneous lupus erythematosus	dermatologic	695.41	logistic	24016	60	23956	0.258	0.13	1.294	0.0475	-0.196	0.13	0.822	0.13	8022	85	7937	-0.0839628	0.112037	0.919465	0.453602	0.113916	0.115189	1.12066	0.322688
Angina pectoris	circulatory system	411.3	logistic	20927	680	20247	0.079	0.04	1.082	0.0487	-0.005	0.04	0.995	0.89	7965	253	7712	0.00832351	0.0654535	1.00836	0.898808	-0.0538271	0.0658339	0.947596	0.413575
Musculoskeletal symptoms referable to limbs	symptoms	771	logistic	26834	657	26177	-0.078	0.04	0.925	0.0496	-0.068	0.04	0.935	0.0882	8114	520	7594	-0.0105074	0.047238	0.989548	0.823974	-0.0630241	0.0476218	0.938921	0.185692
Displacement of intervertebral disc	musculoskeletal	722.1	logistic	24914	547	24367	-0.085	0.043	0.919	0.0507	-0.072	0.043	0.93	0.0948	8245	236	8009	-0.143289	0.0685632	0.866503	0.036628	-0.0769173	0.0690914	0.925966	0.265593
Complication due to other implant and internal device	injuries & poisonings	859	logistic	24445	155	24290	0.158	0.081	1.171	0.0512	-0.03	0.081	0.971	0.715	8486	64	8422	0.0309293	0.132677	1.03141	0.815671	0.326767	0.134104	1.38648	0.0148234
Cardiac congenital anomalies	congenital anomalies	747.1	logistic	28217	1135	27082	0.059	0.03	1.061	0.0513	-0.007	0.03	0.993	0.82	10029	152	9877	-0.0665816	0.0820296	0.935587	0.416977	-0.011322	0.0839694	0.988742	0.892743
Sicca syndrome	dermatologic	709.2	logistic	24081	199	23882	-0.14	0.072	0.869	0.0515	-0.013	0.072	0.987	0.854	8011	83	7928	-0.174976	0.112467	0.839477	0.119756	0.0739487	0.115752	1.07675	0.522916
Secondary malignancy of lymph nodes	neoplasms	198.1	logistic	23858	431	23427	0.095	0.049	1.099	0.0518	-0.005	0.049	0.995	0.922	9006	80	8926	0.000642661	0.114467	1.00064	0.99552	0.0534412	0.116465	1.05489	0.646335
Inflammatory bowel disease and other gastroenteritis and colitis	digestive	555	logistic	21509	617	20892	-0.08	0.041	0.923	0.0532	0.028	0.041	1.028	0.5	6583	108	6475	0.0224818	0.0995406	1.02274	0.821314	0.0886353	0.101698	1.09268	0.383452
Congestive heart failure (CHF) NOS	circulatory system	428.1	logistic	23275	2209	21066	0.045	0.023	1.046	0.0534	-0.037	0.023	0.964	0.109	8714	1197	7517	0.0278131	0.0333395	1.0282	0.404147	0.0736593	0.0335813	1.07644	0.028274
Fracture of ribs	injuries & poisonings	807	logistic	26968	110	26858	-0.184	0.096	0.832	0.0542	0.034	0.096	1.034	0.726	9132	52	9080	0.102628	0.142	1.10808	0.469842	-0.346795	0.144056	0.70695	0.0160681
Complications of transplants and reattached limbs	injuries & poisonings	851	logistic	25033	743	24290	0.072	0.037	1.074	0.0546	-0.006	0.037	0.994	0.881	8725	303	8422	-0.0552961	0.060325	0.946205	0.359333	0.0173068	0.0605345	1.01746	0.774955
Anomalous atrioventricular excitation	circulatory system	426.4	logistic	15238	76	15162	0.219	0.114	1.245	0.0554	-0.002	0.114	0.998	0.985	5310	19	5291	NA	NA	NA	NA	NA	NA	NA	NA
Carcinoma in situ of skin	neoplasms	172.3	logistic	24051	208	23843	0.133	0.069	1.142	0.0562	-0.071	0.069	0.932	0.307	9701	4	9697	NA	NA	NA	NA	NA	NA	NA	NA
Congestive heart failure; nonhypertensive	circulatory system	428	logistic	25461	4395	21066	0.034	0.018	1.034	0.0568	-0.022	0.018	0.978	0.21	9274	1757	7517	0.0271052	0.028696	1.02748	0.344882	0.0717703	0.0290423	1.07441	0.0134649
Abnormal Papanicolaou smear of cervix and cervical HPV	genitourinary	792	logistic	24333	330	24003	0.108	0.057	1.114	0.0568	-0.029	0.057	0.971	0.606	7806	552	7254	-0.0790959	0.0475499	0.923951	0.0962265	-0.0300623	0.0491939	0.970385	0.541135
Spinal cord injury without evidence of spinal bone injury	injuries & poisonings	952	logistic	29078	35	29043	-0.323	0.169	0.724	0.0569	0.186	0.169	1.205	0.27	10265	19	10246	NA	NA	NA	NA	NA	NA	NA	NA
Overweight, obesity and other hyperalimentation	endocrine/metabolic	278	logistic	26811	6414	20397	0.027	0.014	1.028	0.0578	-0.029	0.014	0.971	0.0429	9282	4477	4805	-0.0198558	0.0217237	0.98034	0.360709	0.0102031	0.0220249	1.01026	0.643184
Pain	neurological	338	logistic	26709	962	25747	0.062	0.033	1.064	0.058	0.037	0.033	1.038	0.257	8853	994	7859	0.060956	0.0351092	1.06285	0.0825319	0.0191462	0.0354308	1.01933	0.588932
Central/nonobstroctive sleep apnea	neurological	327.31	logistic	21435	44	21391	0.283	0.15	1.328	0.0588	0.266	0.151	1.305	0.0775	6447	49	6398	0.0885162	0.149322	1.09255	0.553323	-0.0679871	0.150395	0.934273	0.651229
Other peripheral nerve disorders	neurological	351	logistic	27112	893	26219	0.065	0.034	1.067	0.0588	0.059	0.034	1.06	0.0854	9113	774	8339	-0.0134642	0.0392559	0.986626	0.73161	-0.0633064	0.0398262	0.938656	0.111933
Shock	symptoms	797	logistic	28338	204	28134	0.132	0.07	1.141	0.0597	0.005	0.07	1.005	0.945	9981	125	9856	-0.0802423	0.0912713	0.922893	0.379313	0.0586091	0.0923288	1.06036	0.525567
Other disorders of middle ear and mastoid	sense organs	385	logistic	27037	32	27005	0.333	0.177	1.395	0.0601	0.076	0.176	1.078	0.669	9054	5	9049	NA	NA	NA	NA	NA	NA	NA	NA
Malignant neoplasm of small intestine, including duodenum	neoplasms	159.2	logistic	25998	45	25953	-0.279	0.149	0.757	0.0613	-0.462	0.148	0.63	0.00175	9438	9	9429	NA	NA	NA	NA	NA	NA	NA	NA
Cholesterolosis of gallbladder	digestive	575.6	logistic	27470	37	27433	-0.311	0.166	0.733	0.0613	-0.001	0.165	0.999	0.996	9503	9	9494	NA	NA	NA	NA	NA	NA	NA	NA
Malignant neoplasm of ovary and other uterine adnexa	neoplasms	184.1	logistic	24853	156	24697	-0.153	0.082	0.858	0.0614	0.126	0.081	1.135	0.121	8370	38	8332	-0.0820293	0.167743	0.921245	0.62483	0.208777	0.170758	1.23217	0.221462
Unspecified polyarthropathy or polyarthritis	musculoskeletal	716.1	logistic	26282	23	26259	-0.398	0.213	0.672	0.0616	-0.141	0.21	0.868	0.501	8531	10	8521	NA	NA	NA	NA	NA	NA	NA	NA
Chronic pain	neurological	338.2	logistic	26342	595	25747	0.077	0.041	1.081	0.0618	0.034	0.041	1.035	0.409	8590	731	7859	0.114556	0.0405426	1.12138	0.00471954	0.0152776	0.0407218	1.01539	0.707534
Acute renal failure	genitourinary	585.1	logistic	23191	1754	21437	0.047	0.025	1.048	0.0625	-0.03	0.025	0.97	0.227	7525	1292	6233	0.0262034	0.0332954	1.02655	0.431283	-0.00786407	0.0338422	0.992167	0.816247
Heart failure with reduced EF [Systolic or combined heart failure]	circulatory system	428.3	logistic	22760	1694	21066	0.048	0.026	1.049	0.0635	-0.003	0.026	0.997	0.921	8415	898	7517	0.00100348	0.0377207	1.001	0.978776	0.0274027	0.0379133	1.02778	0.469819
Benign neoplasm of brain and other parts of nervous system	neoplasms	225	logistic	28470	218	28252	0.127	0.068	1.135	0.0637	0.016	0.068	1.016	0.82	10169	58	10111	-0.134288	0.13344	0.874338	0.314244	-0.0491075	0.136052	0.952079	0.718139
Renal failure	genitourinary	585	logistic	25605	4168	21437	0.032	0.017	1.033	0.0639	-0.009	0.018	0.991	0.608	8855	2622	6233	0.0381115	0.0260807	1.03885	0.143935	0.0231976	0.0262863	1.02347	0.377507
Cholangitis	digestive	575.1	logistic	27518	85	27433	0.201	0.109	1.222	0.0644	0.084	0.109	1.088	0.438	9518	24	9494	-0.0219447	0.206923	0.978294	0.91554	0.22489	0.211085	1.25219	0.286693
Gingival and periodontal diseases	digestive	523	logistic	27643	69	27574	0.223	0.121	1.25	0.0654	0.01	0.121	1.01	0.937	8860	48	8812	-0.108089	0.1541	0.897548	0.48304	0.231962	0.156412	1.26107	0.138069
Cholesteatoma	sense organs	385.3	logistic	27027	22	27005	0.394	0.214	1.483	0.0655	0.133	0.212	1.142	0.531	9053	4	9049	NA	NA	NA	NA	NA	NA	NA	NA
Anemia of chronic disease	hematopoietic	285.2	logistic	20743	662	20081	0.073	0.04	1.076	0.0661	-0.007	0.04	0.993	0.86	5791	590	5201	0.0202863	0.0464817	1.02049	0.66252	-0.0145262	0.0468306	0.985579	0.756419
Pyogenic arthritis	musculoskeletal	711.1	logistic	26316	57	26259	0.243	0.132	1.275	0.0664	-0.202	0.133	0.817	0.129	8556	35	8521	-0.20994	0.174615	0.810633	0.229246	-0.0792794	0.174496	0.923782	0.649589
Other venous embolism and thrombosis	circulatory system	452	logistic	21282	1443	19839	0.05	0.027	1.051	0.0674	-0.014	0.027	0.986	0.618	7314	824	6490	0.0217088	0.0385977	1.02195	0.573818	0.0411511	0.039215	1.04201	0.294007
Premenstrual tension syndromes	genitourinary	626.4	logistic	25407	20	25387	-0.417	0.229	0.659	0.0689	0.157	0.221	1.17	0.478	7420	NA	NA	NA	NA	NA	NA	NA	NA	NA	NA
Microscopic hematuria	genitourinary	593.2	logistic	23766	479	23287	-0.084	0.046	0.919	0.0691	-0.058	0.046	0.944	0.212	7177	285	6892	-0.117348	0.0628756	0.889276	0.0619933	-0.09056	0.0636783	0.913419	0.154983
Stricture of artery	circulatory system	447.1	logistic	22936	39	22897	0.292	0.161	1.34	0.0699	0.028	0.159	1.028	0.862	8424	13	8411	NA	NA	NA	NA	NA	NA	NA	NA
Type 2 diabetes with ophthalmic manifestations	endocrine/metabolic	250.23	logistic	20702	243	20459	0.117	0.065	1.125	0.0701	-0.061	0.064	0.941	0.346	5901	432	5469	-0.00828417	0.0537827	0.99175	0.877586	0.0842969	0.0539064	1.08795	0.117873
Neurological disorders	mental disorders	292	logistic	26724	1319	25405	-0.051	0.029	0.95	0.0711	-0.04	0.028	0.96	0.153	9121	751	8370	0.0853834	0.0402607	1.08913	0.0339418	0.0393372	0.0406391	1.04012	0.333062
Urinary tract infection	genitourinary	591	logistic	24722	1435	23287	-0.05	0.028	0.952	0.0724	-0.061	0.028	0.941	0.0271	7952	1060	6892	0.0311733	0.034273	1.03166	0.363056	-0.0441767	0.0344263	0.956785	0.199413
Miscarriage; stillbirth	pregnancy complications	634	logistic	28585	194	28391	-0.134	0.075	0.875	0.0726	-0.079	0.074	0.924	0.284	9584	228	9356	0.0143936	0.0725669	1.0145	0.842772	0.050137	0.0736813	1.05142	0.496215
Proteinuria	endocrine/metabolic	269	logistic	28030	519	27511	0.079	0.044	1.083	0.073	-0.01	0.044	0.99	0.823	9569	516	9053	0.0892652	0.0475847	1.09337	0.0606662	-0.00917099	0.0479199	0.990871	0.848227
Known or suspected fetal abnormality affecting management of mother	pregnancy complications	655	logistic	28723	500	28223	0.086	0.048	1.09	0.0739	-0.027	0.048	0.974	0.581	9891	551	9340	0.0113725	0.0538468	1.01144	0.832731	0.00282485	0.0547768	1.00283	0.958871
Iron deficiency anemias	hematopoietic	280	logistic	21283	1202	20081	0.053	0.03	1.055	0.0744	0.016	0.03	1.016	0.59	6310	1109	5201	-0.0260345	0.0348164	0.974302	0.454602	-0.000307308	0.0353009	0.999693	0.993054
Calculus of lower urinary tract	genitourinary	594.2	logistic	26958	51	26907	0.248	0.14	1.282	0.0753	0.014	0.14	1.014	0.922	9675	15	9660	NA	NA	NA	NA	NA	NA	NA	NA
Benign neoplasm of other parts of digestive system	neoplasms	211	logistic	26823	186	26637	-0.131	0.074	0.877	0.0757	0.094	0.074	1.099	0.2	9584	66	9518	0.0636856	0.128858	1.06576	0.621144	0.0290136	0.130372	1.02944	0.823891
Cancer of oropharynx	neoplasms	149.1	logistic	28488	151	28337	0.144	0.081	1.155	0.0761	0.035	0.081	1.036	0.668	10183	16	10167	NA	NA	NA	NA	NA	NA	NA	NA
Symptoms involving female genital tract	genitourinary	624	logistic	27622	148	27474	0.146	0.083	1.158	0.0768	0.147	0.083	1.158	0.0757	8815	156	8659	-0.0567014	0.0840722	0.944876	0.500034	-0.0675841	0.0853218	0.934649	0.428298
Urethritis and urethral syndrome	genitourinary	592.2	logistic	23314	27	23287	0.341	0.193	1.407	0.0769	0.226	0.195	1.254	0.246	6907	15	6892	NA	NA	NA	NA	NA	NA	NA	NA
Benign neoplasm of kidney and other urinary organs	neoplasms	223	logistic	17333	32	17301	0.318	0.18	1.374	0.077	0.035	0.176	1.035	0.845	4087	9	4078	NA	NA	NA	NA	NA	NA	NA	NA
Intervertebral disc disorders	musculoskeletal	722	logistic	25815	1448	24367	-0.048	0.027	0.953	0.0779	-0.019	0.027	0.981	0.488	8836	827	8009	0.00385932	0.0383046	1.00387	0.919746	-0.043265	0.0386003	0.957658	0.262354
Benign neoplasm of brain, cranial nerves, meninges	neoplasms	225.1	logistic	28458	206	28252	0.124	0.07	1.132	0.0782	0.007	0.07	1.007	0.921	10166	55	10111	-0.0988949	0.138185	0.905838	0.474196	0.00525639	0.140581	1.00527	0.970174
Papanicolaou smear of cervix or vagina with atypical squamous cells	genitourinary	792.1	logistic	24166	163	24003	0.14	0.08	1.151	0.0792	-0.066	0.08	0.936	0.408	7547	293	7254	-0.0851824	0.0631753	0.918345	0.177546	-0.00509189	0.0661523	0.994921	0.938646
Pallor and flushing	symptoms	782.6	logistic	25106	69	25037	-0.213	0.121	0.808	0.0795	-0.117	0.121	0.889	0.332	7651	16	7635	NA	NA	NA	NA	NA	NA	NA	NA
Hyperpotassemia	endocrine/metabolic	276.13	logistic	22069	706	21363	0.067	0.038	1.07	0.0798	-0.019	0.038	0.981	0.612	7054	513	6541	-0.024027	0.0484337	0.976259	0.619838	0.0689885	0.0487171	1.07142	0.156745
Seborrheic dermatitis	dermatologic	690.1	logistic	24419	215	24204	-0.121	0.069	0.886	0.0801	0.071	0.068	1.074	0.298	8092	70	8022	0.0314059	0.124035	1.0319	0.800113	-0.22996	0.124569	0.794565	0.0648843
Fracture of unspecified bones	injuries & poisonings	809	logistic	26909	51	26858	0.245	0.14	1.278	0.0803	0.164	0.141	1.178	0.243	9111	31	9080	-0.0463467	0.186418	0.954711	0.803657	-0.00175588	0.189897	0.998246	0.992623
Anemia in neoplastic disease	hematopoietic	285.22	logistic	20261	180	20081	0.131	0.075	1.14	0.0822	0.076	0.075	1.079	0.313	5255	54	5201	0.0669183	0.143366	1.06921	0.640669	-0.0347374	0.144174	0.965859	0.809602
Secondary thrombocytopenia	hematopoietic	287.32	logistic	20794	53	20741	-0.24	0.138	0.787	0.0823	-0.075	0.137	0.927	0.583	7992	19	7973	NA	NA	NA	NA	NA	NA	NA	NA
Cancer of connective tissue	neoplasms	170.2	logistic	28931	204	28727	0.122	0.07	1.13	0.0825	-0.155	0.07	0.856	0.0271	10240	44	10196	0.0123116	0.153545	1.01239	0.936092	-0.173663	0.155597	0.84058	0.264378
Myasthenia gravis	neurological	358.1	logistic	27154	72	27082	-0.204	0.118	0.815	0.0837	0.18	0.118	1.197	0.127	9332	21	9311	0.143695	0.228544	1.15453	0.529521	-0.162552	0.230973	0.849972	0.481577
Arterial embolism and thrombosis	circulatory system	444	logistic	23086	189	22897	0.126	0.073	1.135	0.0849	0.12	0.073	1.128	0.1	8530	119	8411	-0.0106275	0.096951	0.989429	0.912713	-0.0772793	0.0981367	0.925631	0.431009
Disorders of the globe	sense organs	360	logistic	26728	23	26705	0.36	0.209	1.433	0.085	0.228	0.21	1.256	0.277	8553	19	8534	NA	NA	NA	NA	NA	NA	NA	NA
Congenital osteodystrophies	congenital anomalies	756.5	logistic	28586	93	28493	0.18	0.104	1.197	0.0854	0.085	0.104	1.089	0.413	10023	34	9989	-0.0575428	0.174735	0.944081	0.741918	0.281354	0.179049	1.32492	0.116094
Hypothyroidism NOS	endocrine/metabolic	244.4	logistic	25162	2847	22315	-0.035	0.02	0.966	0.0855	-0.03	0.02	0.97	0.137	8743	536	8207	0.0471058	0.0464027	1.04823	0.310034	0.0447325	0.0466692	1.04575	0.33781
Nonrheumatic tricuspid valve disorders	circulatory system	395.3	logistic	22088	125	21963	0.154	0.09	1.167	0.0855	0.001	0.09	1.001	0.991	8420	52	8368	-0.20905	0.142464	0.811355	0.142272	-0.212411	0.145853	0.808632	0.1453
Erythematosquamous dermatosis	dermatologic	690	logistic	24421	217	24204	-0.118	0.069	0.889	0.0855	0.075	0.068	1.078	0.269	8092	70	8022	0.0314059	0.124035	1.0319	0.800113	-0.22996	0.124569	0.794565	0.0648843
Nonrheumatic aortic valve disorders	circulatory system	395.2	logistic	24771	2808	21963	0.037	0.021	1.037	0.0866	-0.039	0.021	0.961	0.0631	8687	319	8368	-0.0155673	0.0598619	0.984553	0.794823	-0.0760532	0.0602667	0.926767	0.206969
Psychogenic and somatoform disorders	mental disorders	303	logistic	19359	95	19264	0.176	0.103	1.193	0.0869	-0.032	0.103	0.969	0.761	5806	72	5734	-0.129865	0.11898	0.878214	0.27506	0.0168101	0.124337	1.01695	0.892456
Asthma with exacerbation	respiratory	495.2	logistic	23154	231	22923	0.114	0.067	1.121	0.0874	0.028	0.066	1.029	0.669	7454	412	7042	-0.00779798	0.0533201	0.992232	0.883725	-0.0127436	0.0540803	0.987337	0.81371
Vascular dementia	mental disorders	290.16	logistic	25427	22	25405	-0.367	0.216	0.693	0.0896	-0.146	0.214	0.864	0.494	8388	18	8370	NA	NA	NA	NA	NA	NA	NA	NA
Cardiac defibrillator in situ	circulatory system	426.92	logistic	16592	1430	15162	0.047	0.028	1.049	0.0908	-0.062	0.028	0.94	0.028	5777	486	5291	0.00506385	0.0494538	1.00508	0.918443	-0.012941	0.049954	0.987142	0.79559
Cholecystitis without cholelithiasis	digestive	574.3	logistic	27551	118	27433	0.156	0.092	1.169	0.0908	-0.041	0.092	0.96	0.66	9542	48	9494	-0.0288804	0.149631	0.971533	0.846951	0.0411676	0.152063	1.04203	0.7866
Viral pneumonia	respiratory	480.2	logistic	24954	38	24916	0.272	0.162	1.313	0.0923	-0.057	0.162	0.944	0.724	7949	19	7930	NA	NA	NA	NA	NA	NA	NA	NA
Intestinal disaccharidase deficiencies and disaccharide malabsorption	endocrine/metabolic	271.3	logistic	28212	639	27573	-0.068	0.04	0.935	0.0924	0.026	0.04	1.026	0.52	9339	608	8731	-0.0134592	0.043791	0.986631	0.758576	-0.0532128	0.0443775	0.948178	0.230491
Chronic renal failure [CKD]	genitourinary	585.3	logistic	24445	3008	21437	0.034	0.02	1.034	0.0931	-0.012	0.02	0.988	0.56	8227	1994	6233	0.0391466	0.0288541	1.03992	0.174874	0.0396075	0.0290152	1.0404	0.172234
Cancer of tongue	neoplasms	145.2	logistic	28569	232	28337	0.11	0.066	1.116	0.0951	-0.072	0.066	0.93	0.27	10182	15	10167	NA	NA	NA	NA	NA	NA	NA	NA
Benign neoplasm of skin	neoplasms	216	logistic	25661	6905	18756	-0.024	0.014	0.976	0.0953	-0.001	0.014	0.999	0.969	8726	4103	4623	-0.0287793	0.0228731	0.971631	0.208314	-0.0200456	0.0230837	0.980154	0.385182
Other specified gastritis	digestive	535.8	logistic	26130	37	26093	-0.275	0.165	0.76	0.0963	-0.189	0.164	0.828	0.249	8456	33	8423	-0.279605	0.182283	0.756082	0.125052	0.372442	0.183768	1.45127	0.0426939
Congenital anomalies of skin	dermatologic	691	logistic	24234	30	24204	-0.305	0.184	0.737	0.0968	-0.018	0.182	0.982	0.922	8034	12	8022	NA	NA	NA	NA	NA	NA	NA	NA
Renal osteodystrophy	genitourinary	588.1	logistic	21457	20	21437	0.37	0.224	1.447	0.0985	0.322	0.226	1.379	0.155	6254	21	6233	-0.258369	0.232379	0.77231	0.266206	-0.362689	0.233038	0.695803	0.119625
Urinary obstruction	genitourinary	599.1	logistic	22303	50	22253	-0.234	0.142	0.791	0.099	0.14	0.142	1.15	0.325	6507	18	6489	NA	NA	NA	NA	NA	NA	NA	NA
Other abnormal blood chemistry	symptoms	790.6	logistic	27021	974	26047	-0.054	0.033	0.948	0.0998	-0.018	0.033	0.982	0.579	9021	520	8501	-0.0484996	0.0466696	0.952658	0.298706	-0.0321793	0.0471442	0.968333	0.494877
Encounter for long-term (current) use of anticoagulants	hematopoietic	286.2	logistic	23645	2904	20741	0.034	0.02	1.034	0.1	-0.021	0.02	0.98	0.314	8823	850	7973	0.0312617	0.0376826	1.03176	0.406761	0.0753698	0.0379991	1.07828	0.0473155
Other paralytic syndromes	neurological	344	logistic	25016	36	24980	-0.275	0.167	0.76	0.1	-0.038	0.167	0.963	0.822	8396	27	8369	-0.149514	0.205668	0.861126	0.467246	-0.158736	0.209795	0.853221	0.449273
Solitary pulmonary nodule	respiratory	514.2	logistic	26836	1122	25714	-0.05	0.031	0.951	0.102	-0.047	0.031	0.954	0.129	9260	417	8843	-0.0864043	0.0519479	0.917223	0.0962548	-0.00307883	0.0526727	0.996926	0.953388
Nephritis and nephropathy in diseases classified elsewhere	genitourinary	580.31	logistic	21484	47	21437	-0.24	0.146	0.787	0.102	0.127	0.146	1.135	0.386	6306	73	6233	-0.0667426	0.123198	0.935436	0.58799	0.222639	0.125367	1.24937	0.075751
Alkalosis	endocrine/metabolic	276.42	logistic	21390	27	21363	-0.313	0.193	0.731	0.105	-0.209	0.193	0.812	0.28	6565	24	6541	0.2929	0.214344	1.34031	0.171783	-0.0277089	0.214963	0.972672	0.897436
Problems associated with amniotic cavity and membranes	pregnancy complications	653	logistic	28597	136	28461	-0.143	0.088	0.867	0.105	-0.044	0.088	0.957	0.617	9680	136	9544	0.022262	0.0929107	1.02251	0.810636	0.0420046	0.0940233	1.0429	0.655058
Type 2 diabetes with ketoacidosis	endocrine/metabolic	250.21	logistic	20479	20	20459	0.36	0.223	1.434	0.106	-0.101	0.221	0.904	0.648	5536	67	5469	0.110506	0.130625	1.11684	0.397563	0.149432	0.132118	1.16117	0.258033
Purpura and other hemorrhagic conditions	hematopoietic	287	logistic	21936	1195	20741	0.048	0.03	1.05	0.107	-0.028	0.03	0.972	0.345	8408	435	7973	0.0279479	0.0514375	1.02834	0.586898	0.040723	0.052022	1.04156	0.433743
Primary/intrinsic cardiomyopathies	circulatory system	425.1	logistic	26498	1966	24532	0.038	0.024	1.039	0.107	-0.023	0.024	0.977	0.322	9515	883	8632	0.0334012	0.0368924	1.03397	0.365271	0.0406369	0.037256	1.04147	0.275384
Acquired deformities of finger	musculoskeletal	736.2	logistic	26830	22	26808	-0.342	0.213	0.71	0.108	-0.221	0.213	0.802	0.299	8972	20	8952	-0.157805	0.231839	0.854016	0.496082	0.25708	0.235708	1.29315	0.275416
Chronic fatigue syndrome	symptoms	798.1	logistic	20800	116	20684	-0.15	0.093	0.86	0.108	0.117	0.093	1.124	0.21	6758	33	6725	-0.339625	0.176748	0.712037	0.0546667	0.103529	0.180215	1.10908	0.565649
Peptic ulcer, site unspecified	digestive	531.4	logistic	28348	108	28240	0.155	0.097	1.168	0.109	0.03	0.097	1.03	0.759	9874	67	9807	-0.00689937	0.126412	0.993124	0.956474	0.109739	0.128791	1.11599	0.394175
Arthropathy associated with infections	musculoskeletal	711	logistic	26335	76	26259	0.184	0.115	1.202	0.109	-0.118	0.115	0.889	0.304	8565	44	8521	-0.120817	0.155713	0.886196	0.43781	-0.0423684	0.155612	0.958517	0.785415
Pancreatic cancer	neoplasms	157	logistic	26115	162	25953	-0.126	0.079	0.882	0.111	0.038	0.079	1.039	0.63	9464	35	9429	0.593207	0.17639	1.80978	0.000770866	0.0203275	0.176612	1.02054	0.908368
Insulin pump user	endocrine/metabolic	250.3	logistic	21356	897	20459	0.055	0.034	1.056	0.111	-0.053	0.034	0.949	0.121	6192	723	5469	0.00622548	0.0419989	1.00624	0.882162	0.0278772	0.0427298	1.02827	0.514139
Heart transplant/surgery	circulatory system	429.1	logistic	21661	595	21066	0.067	0.042	1.069	0.111	-0.034	0.042	0.967	0.421	7687	170	7517	-0.0369641	0.0805086	0.963711	0.646139	0.120917	0.080975	1.12853	0.135369
Pelvic inflammatory disease (PID)	genitourinary	614.3	logistic	28108	28	28080	0.305	0.192	1.357	0.112	-0.203	0.192	0.817	0.29	8583	67	8516	0.0357052	0.131306	1.03635	0.785681	-0.126156	0.133531	0.881477	0.344775
Adverse effects of antibacterials (not penicillins)	injuries & poisonings	960.1	logistic	22655	27	22628	0.307	0.193	1.359	0.112	0.02	0.193	1.02	0.919	7567	6	7561	NA	NA	NA	NA	NA	NA	NA	NA
Open wound of foot except toe(s) alone	injuries & poisonings	871.3	logistic	27165	48	27117	0.23	0.145	1.258	0.113	0.091	0.145	1.096	0.529	9072	29	9043	0.180198	0.20257	1.19745	0.373703	-0.0815904	0.201865	0.921649	0.686078
Other disorders of eye	sense organs	379	logistic	27080	648	26432	-0.063	0.04	0.939	0.115	-0.001	0.04	0.999	0.983	8724	401	8323	-0.0308284	0.05312	0.969642	0.561675	0.0916681	0.0539957	1.096	0.0895655
Otitis media	sense organs	381.1	logistic	27336	331	27005	0.087	0.055	1.091	0.115	0.096	0.055	1.101	0.0818	9195	146	9049	0.0179441	0.0858272	1.01811	0.834392	0.103157	0.0873497	1.10867	0.237617
Congenital anomalies of peripheral vascular system	congenital anomalies	747.2	logistic	27151	69	27082	-0.19	0.121	0.827	0.115	-0.062	0.121	0.939	0.607	9923	46	9877	-0.1557	0.146473	0.855816	0.287785	0.190595	0.150559	1.20997	0.205543
Thrombocytopenia	hematopoietic	287.3	logistic	21841	1100	20741	0.049	0.031	1.05	0.116	-0.03	0.031	0.97	0.335	8397	424	7973	0.0170429	0.0520336	1.01719	0.743262	0.0415239	0.0526309	1.0424	0.430134
Other acute and subacute forms of ischemic heart disease	circulatory system	411.9	logistic	20277	30	20247	0.288	0.184	1.334	0.117	0.08	0.183	1.083	0.663	7735	23	7712	-0.0699011	0.215839	0.932486	0.746045	0.0411802	0.21578	1.04204	0.848648
Frequency of urination and polyuria	genitourinary	599.5	logistic	23516	1263	22253	-0.046	0.029	0.955	0.118	0.001	0.029	1.001	0.967	7359	870	6489	0.0188031	0.038229	1.01898	0.622824	0.00461825	0.0382391	1.00463	0.903871
Postlaminectomy syndrome	musculoskeletal	722.8	logistic	24397	30	24367	0.286	0.183	1.331	0.119	-0.234	0.183	0.792	0.201	8032	23	8009	-0.311437	0.21143	0.732394	0.14075	0.00315489	0.209305	1.00316	0.987974
Disorders of carbohydrate transport and metabolism	endocrine/metabolic	271	logistic	28227	654	27573	-0.062	0.04	0.94	0.12	0.033	0.04	1.033	0.406	9347	616	8731	-0.00301851	0.0434947	0.996986	0.944672	-0.0440578	0.0440853	0.956899	0.317612
Other retinal disorders	sense organs	362	logistic	27064	676	26388	-0.061	0.039	0.941	0.12	0.012	0.039	1.012	0.764	8627	394	8233	0.0722938	0.0542942	1.07497	0.183018	0.0195013	0.0548271	1.01969	0.722075
Septicemia	infectious diseases	38	logistic	26247	999	25248	0.05	0.032	1.051	0.121	-0.024	0.032	0.976	0.447	8731	572	8159	0.0451082	0.0453317	1.04614	0.319703	-0.0205888	0.0459776	0.979622	0.654297
Hypoglycemia	endocrine/metabolic	251.1	logistic	18689	87	18602	0.167	0.108	1.181	0.123	0.076	0.108	1.079	0.481	4980	95	4885	0.136758	0.109326	1.14655	0.210965	0.195903	0.110054	1.21641	0.0750669
Phlebitis and thrombophlebitis of lower extremities	circulatory system	451.2	logistic	19880	41	19839	-0.241	0.156	0.786	0.123	-0.154	0.156	0.857	0.323	6530	40	6490	-0.53819	0.159977	0.583804	0.000767719	0.228538	0.163619	1.25676	0.162483
Diaphragmatic hernia	digestive	550.2	logistic	25731	450	25281	-0.074	0.048	0.929	0.123	0.011	0.048	1.011	0.823	8928	169	8759	-0.0168192	0.0783841	0.983321	0.830099	0.0524671	0.0803337	1.05387	0.513682
Contracture of palmar fascia [Dupuytren's disease]	musculoskeletal	728.71	logistic	23538	65	23473	0.191	0.124	1.211	0.123	-0.086	0.124	0.917	0.486	6741	8	6733	NA	NA	NA	NA	NA	NA	NA	NA
Conductive hearing loss	sense organs	389.2	logistic	25805	135	25670	0.133	0.087	1.143	0.124	0.143	0.086	1.154	0.0969	9099	51	9048	0.21934	0.146323	1.24525	0.133871	0.247084	0.146128	1.28029	0.0908624
Abnormal results of function study of liver	digestive	573.7	logistic	24563	185	24378	0.113	0.074	1.12	0.125	-0.035	0.074	0.966	0.638	8240	65	8175	0.0986748	0.127007	1.10371	0.437203	0.0852772	0.128409	1.08902	0.506624
Noninflammatory female genital disorders	genitourinary	619	logistic	28195	598	27597	0.065	0.042	1.067	0.125	-0.1	0.043	0.905	0.0189	9273	796	8477	0.0351659	0.0407042	1.03579	0.387622	-0.0203975	0.0418299	0.979809	0.625812
Senile cataract	sense organs	366.2	logistic	27474	1049	26425	-0.049	0.032	0.952	0.126	0.013	0.032	1.013	0.693	9053	904	8149	0.00919812	0.0391973	1.00924	0.814471	0.0774151	0.0394851	1.08049	0.0499238
Poisoning by hormones and synthetic substitutes	injuries & poisonings	962	logistic	22999	371	22628	0.08	0.052	1.083	0.127	-0.053	0.052	0.948	0.311	7730	169	7561	-0.174587	0.0800081	0.839804	0.0291008	-0.0298833	0.081586	0.970559	0.714157
Exophthalmos	endocrine/metabolic	242.3	logistic	22337	22	22315	-0.328	0.215	0.721	0.128	0.063	0.212	1.065	0.767	8241	34	8207	-0.0286686	0.186279	0.971738	0.877687	0.351142	0.186989	1.42069	0.0603984
Anterior pituitary disorders	endocrine/metabolic	253.4	logistic	25865	20	25845	0.339	0.223	1.403	0.128	0.209	0.222	1.232	0.347	8601	6	8595	NA	NA	NA	NA	NA	NA	NA	NA
Diabetes or abnormal glucose tolerance complicating pregnancy	pregnancy complications	649.1	logistic	28216	148	28068	0.129	0.085	1.137	0.129	-0.111	0.085	0.895	0.189	9256	179	9077	0.0247304	0.0849509	1.02504	0.770964	-0.0281746	0.0842056	0.972219	0.737932
Disorders of vitreous body	sense organs	379.2	logistic	26950	518	26432	-0.068	0.045	0.934	0.13	-0.006	0.045	0.994	0.901	8595	272	8323	-0.00672146	0.0637947	0.993301	0.916089	0.0247815	0.06495	1.02509	0.702796
Delirium due to conditions classified elsewhere	mental disorders	290.2	logistic	25434	29	25405	-0.282	0.186	0.755	0.131	0.087	0.186	1.091	0.638	8382	12	8370	NA	NA	NA	NA	NA	NA	NA	NA
Paroxysmal ventricular tachycardia	circulatory system	427.12	logistic	16664	1502	15162	0.041	0.027	1.042	0.131	-0.027	0.027	0.973	0.327	5728	437	5291	0.0713928	0.0516023	1.074	0.166506	-0.00252221	0.0520538	0.997481	0.961355
Diabetes mellitus	endocrine/metabolic	250	logistic	25746	5287	20459	0.024	0.016	1.024	0.132	-0.021	0.016	0.979	0.184	8918	3449	5469	0.00110119	0.0236477	1.0011	0.962859	0.0125016	0.0238408	1.01258	0.600016
Abnormal tumor markers	symptoms	795.8	logistic	28980	27	28953	-0.293	0.194	0.746	0.132	0.185	0.194	1.203	0.34	10095	9	10086	NA	NA	NA	NA	NA	NA	NA	NA
Hypothyroidism	endocrine/metabolic	244	logistic	25665	3350	22315	-0.029	0.019	0.972	0.133	-0.032	0.019	0.969	0.0915	8850	643	8207	0.0199484	0.0427019	1.02015	0.640389	0.0432693	0.0427215	1.04422	0.311145
Arthropathy NOS	musculoskeletal	716.9	logistic	26618	359	26259	0.08	0.054	1.084	0.133	0.034	0.054	1.035	0.522	8846	325	8521	0.0045602	0.0588644	1.00457	0.93825	-0.00153583	0.0596036	0.998465	0.979443
Hormones and synthetic substitutes causing adverse effects in therapeutic use	injuries & poisonings	962.3	logistic	22783	155	22628	-0.12	0.081	0.887	0.136	-0.046	0.081	0.955	0.566	7632	71	7561	-0.207259	0.122126	0.81281	0.0896789	-0.0507524	0.124733	0.950514	0.684091
Abnormality of gait	neurological	350.2	logistic	26554	522	26032	-0.066	0.045	0.936	0.137	-0.025	0.044	0.975	0.573	8901	271	8630	-0.0767315	0.0653118	0.926138	0.240055	-0.0770652	0.0655905	0.925829	0.240017
Chronic hepatitis	infectious diseases	70.4	logistic	24777	58	24719	-0.194	0.131	0.823	0.139	-0.127	0.132	0.881	0.336	7298	42	7256	-0.0462081	0.160183	0.954843	0.772987	-0.121004	0.162561	0.88603	0.456657
Malignant neoplasm of renal pelvis	neoplasms	189.12	logistic	27761	26	27735	-0.291	0.197	0.747	0.14	-0.361	0.198	0.697	0.0683	9950	4	9946	NA	NA	NA	NA	NA	NA	NA	NA
Extrapyramidal disease and abnormal movement disorders	neurological	333	logistic	25219	239	24980	0.096	0.065	1.101	0.141	-0.037	0.065	0.963	0.566	8433	64	8369	0.17216	0.13152	1.18787	0.190533	-0.128364	0.132388	0.879533	0.332245
Poisoning by other anti-infectives	injuries & poisonings	961	logistic	22707	79	22628	-0.167	0.113	0.847	0.141	0.136	0.113	1.146	0.227	7601	40	7561	-0.140418	0.172686	0.868995	0.41614	0.253765	0.177886	1.28887	0.153706
Gastroparesis	digestive	536.3	logistic	26281	188	26093	0.108	0.073	1.114	0.142	0.039	0.073	1.04	0.595	8543	120	8423	0.0291246	0.094144	1.02955	0.757046	0.127696	0.0944318	1.13621	0.176295
Myeloid leukemia, acute	neoplasms	204.21	logistic	27358	73	27285	0.171	0.117	1.187	0.144	0.104	0.117	1.11	0.373	9858	9	9849	NA	NA	NA	NA	NA	NA	NA	NA
Hereditary retinal dystrophies	sense organs	362.7	logistic	26417	29	26388	-0.274	0.187	0.761	0.144	-0.296	0.185	0.744	0.109	8244	11	8233	NA	NA	NA	NA	NA	NA	NA	NA
Preeclampsia and eclampsia	pregnancy complications	642.1	logistic	28808	62	28746	0.187	0.128	1.205	0.145	-0.172	0.131	0.842	0.188	9861	129	9732	0.0585924	0.0960092	1.06034	0.541677	-0.0741352	0.0970214	0.928546	0.444801
Fracture of vertebral column without mention of spinal cord injury	injuries & poisonings	805	logistic	27101	243	26858	-0.094	0.065	0.91	0.145	-0.015	0.065	0.986	0.822	9146	66	9080	0.127444	0.126751	1.13592	0.314672	-0.048857	0.128573	0.952317	0.70395
Cancer of other male genital organs	neoplasms	187	logistic	27209	168	27041	0.113	0.078	1.12	0.146	0.022	0.078	1.022	0.779	9691	22	9669	0.118461	0.219381	1.12576	0.589214	-0.190134	0.217277	0.826848	0.381532
Cancer of brain	neoplasms	191.11	logistic	28442	190	28252	0.106	0.073	1.112	0.146	-0.178	0.073	0.837	0.0142	10123	12	10111	NA	NA	NA	NA	NA	NA	NA	NA
Myoneural disorders	neurological	358	logistic	27158	76	27082	-0.166	0.115	0.847	0.148	0.185	0.115	1.203	0.108	9333	22	9311	0.0884684	0.224144	1.0925	0.693069	-0.128695	0.226257	0.879242	0.569492
Psoriasis and related disorders	dermatologic	696	logistic	24182	449	23733	-0.069	0.048	0.933	0.148	0.05	0.048	1.051	0.298	7844	84	7760	0.123156	0.112607	1.13106	0.274098	-0.152747	0.113745	0.858347	0.179307
Keloid scar	dermatologic	701.4	logistic	26583	26	26557	-0.284	0.197	0.753	0.148	-0.057	0.197	0.944	0.771	9231	47	9184	0.13207	0.157759	1.14119	0.402501	0.0956824	0.156762	1.10041	0.541618
Generalized convulsive epilepsy	neurological	345.11	logistic	25055	75	24980	0.167	0.116	1.182	0.149	0.099	0.117	1.104	0.394	8410	41	8369	-0.150633	0.156013	0.860164	0.334288	0.113586	0.159447	1.12029	0.476232
Leukoplakia of oral mucosa	digestive	528.6	logistic	27052	34	27018	-0.25	0.173	0.779	0.149	0.016	0.172	1.016	0.925	9427	5	9422	NA	NA	NA	NA	NA	NA	NA	NA
Diverticulosis	digestive	562.1	logistic	21585	693	20892	-0.057	0.039	0.945	0.149	0.035	0.039	1.036	0.363	6864	389	6475	0.0169116	0.0550103	1.01706	0.758519	0.00676358	0.056537	1.00679	0.904775
Psoriasis	dermatologic	696.4	logistic	24169	436	23733	-0.07	0.049	0.932	0.149	0.062	0.048	1.064	0.202	7834	74	7760	0.119239	0.119182	1.12664	0.317076	-0.173555	0.120534	0.840671	0.149902
Disorders of acoustic nerve	sense organs	389.5	logistic	25696	26	25670	0.283	0.196	1.327	0.15	0.04	0.197	1.041	0.84	9056	8	9048	NA	NA	NA	NA	NA	NA	NA	NA
Psychogenic disorder	mental disorders	303.3	logistic	19327	63	19264	0.181	0.126	1.198	0.151	0.042	0.127	1.043	0.739	5770	36	5734	0.0879674	0.165258	1.09195	0.594517	0.111278	0.171116	1.11771	0.515492
Atrial fibrillation and flutter	circulatory system	427.2	logistic	20592	5430	15162	0.025	0.017	1.025	0.151	-0.021	0.017	0.979	0.22	6217	926	5291	0.058463	0.0382949	1.06021	0.126847	0.0129414	0.0387917	1.01303	0.738672
Other mental disorder	mental disorders	306	logistic	19434	170	19264	0.11	0.077	1.117	0.152	-0.037	0.078	0.964	0.637	5913	179	5734	0.139204	0.0813743	1.14936	0.0871435	0.104071	0.0818735	1.10968	0.203685
Rheumatoid arthritis	musculoskeletal	714.1	logistic	26398	338	26060	0.079	0.055	1.082	0.152	0.041	0.055	1.042	0.455	8863	236	8627	-0.00392769	0.0687986	0.99608	0.954474	-0.0450319	0.0696615	0.955967	0.517995
Psoriasis vulgaris	dermatologic	696.41	logistic	24107	374	23733	-0.075	0.052	0.928	0.153	0.065	0.052	1.067	0.215	7827	67	7760	0.118804	0.125042	1.12615	0.342056	-0.118701	0.126489	0.888073	0.348024
Cancer of other female genital organs	neoplasms	184	logistic	24884	187	24697	-0.107	0.075	0.899	0.154	0.082	0.075	1.085	0.273	8398	66	8332	-0.0408498	0.128791	0.959973	0.751108	0.146163	0.130987	1.15738	0.264485
Other infectious and parasitic diseases	infectious diseases	136	logistic	27968	267	27701	0.087	0.062	1.091	0.155	0.02	0.061	1.02	0.741	9351	183	9168	-0.0222083	0.0773613	0.978036	0.774056	0.0637757	0.078303	1.06585	0.415374
Kyphosis (acquired)	musculoskeletal	737.1	logistic	26834	26	26808	0.279	0.197	1.322	0.156	-0.05	0.197	0.952	0.801	8962	10	8952	NA	NA	NA	NA	NA	NA	NA	NA
Diseases due to other mycobacteria	infectious diseases	31	logistic	25309	61	25248	0.181	0.129	1.198	0.16	-0.013	0.128	0.987	0.918	8176	17	8159	NA	NA	NA	NA	NA	NA	NA	NA
Macular degeneration, dry	sense organs	362.21	logistic	26441	53	26388	-0.196	0.14	0.822	0.161	-0.078	0.138	0.925	0.569	8242	9	8233	NA	NA	NA	NA	NA	NA	NA	NA
Nonrheumatic mitral valve disorders	circulatory system	395.1	logistic	23761	1798	21963	0.035	0.025	1.036	0.161	-0.066	0.025	0.936	0.00908	8765	397	8368	-0.0564263	0.0535055	0.945136	0.291613	-0.0382586	0.0541184	0.962464	0.479602
Excessive vomiting in pregnancy	pregnancy complications	643	logistic	29058	31	29027	-0.261	0.186	0.77	0.161	0.054	0.185	1.056	0.77	10116	133	9983	-0.00777976	0.094445	0.99225	0.93435	0.00257873	0.0964091	1.00258	0.978661
Other and nonspecific abnormal cytological, histological and immunological findings	symptoms	795	logistic	28987	34	28953	-0.243	0.174	0.784	0.162	0.096	0.174	1.101	0.579	10124	38	10086	-0.2045	0.161376	0.815055	0.205074	0.0885715	0.167734	1.09261	0.597467
Poisoning by antibiotics	injuries & poisonings	960	logistic	23232	604	22628	0.058	0.041	1.06	0.162	-0.017	0.041	0.983	0.674	7826	265	7561	-0.0158703	0.0645615	0.984255	0.805824	-0.0551252	0.0658187	0.946367	0.402294
Diabetes type 2 with peripheral circulatory disorders	endocrine/metabolic	250.25	logistic	20554	95	20459	0.143	0.103	1.154	0.165	-0.174	0.102	0.84	0.0892	5583	114	5469	0.00650112	0.09952	1.00652	0.947915	-0.0798577	0.10094	0.923248	0.428863
Cystitis	genitourinary	592.1	logistic	23540	253	23287	-0.088	0.064	0.915	0.165	0.028	0.064	1.028	0.665	7010	118	6892	0.10997	0.0942691	1.11624	0.243389	0.0630463	0.0952885	1.06508	0.508204
Other persistent mental disorders due to conditions classified elsewhere	mental disorders	290.3	logistic	25425	20	25405	0.309	0.223	1.363	0.166	-0.132	0.223	0.876	0.552	8383	13	8370	NA	NA	NA	NA	NA	NA	NA	NA
Sialoadenitis	digestive	527.2	logistic	27085	67	27018	0.171	0.123	1.187	0.166	-0.153	0.123	0.858	0.215	9459	37	9422	0.116325	0.172836	1.12336	0.500924	-0.2065	0.174159	0.813426	0.235742
Other nonmalignant breast conditions	genitourinary	613	logistic	28474	390	28084	0.072	0.052	1.074	0.166	0.071	0.052	1.074	0.166	9749	384	9365	0.0217052	0.0548986	1.02194	0.692571	-0.0334008	0.0558205	0.967151	0.549599
Melanomas of skin	neoplasms	172.11	logistic	24398	555	23843	-0.059	0.043	0.942	0.168	-0.051	0.043	0.95	0.236	9705	8	9697	NA	NA	NA	NA	NA	NA	NA	NA
Manlignant and unknown neoplasms of brain and nervous system	neoplasms	191	logistic	28523	271	28252	0.084	0.061	1.088	0.168	-0.135	0.061	0.874	0.0278	10143	32	10111	-0.186676	0.175869	0.829712	0.288486	-0.146642	0.179525	0.863603	0.414025
Hypertension complicating pregnancy, childbirth, and the puerperium	pregnancy complications	642	logistic	28958	212	28746	0.097	0.071	1.102	0.168	-0.011	0.071	0.989	0.877	10094	362	9732	0.0838887	0.0597938	1.08751	0.160626	-0.046775	0.0605295	0.954302	0.439662
Cancer of mouth	neoplasms	145	logistic	28670	333	28337	0.076	0.055	1.079	0.17	-0.02	0.055	0.98	0.714	10194	27	10167	-0.144132	0.206139	0.865774	0.48443	0.151099	0.206516	1.16311	0.464377
Chronic dermatitis due to solar radiation	dermatologic	938.2	logistic	23705	308	23397	-0.079	0.058	0.924	0.17	0.084	0.057	1.088	0.144	7413	NA	NA	NA	NA	NA	NA	NA	NA	NA	NA
Ovarian dysfunction	endocrine/metabolic	256	logistic	26110	265	25845	0.088	0.064	1.092	0.171	0.034	0.064	1.034	0.602	8783	188	8595	-0.0108444	0.0775023	0.989214	0.88872	0.19355	0.0802729	1.21355	0.0159023
Hemorrhage or hematoma complicating a procedure	injuries & poisonings	850	logistic	24486	196	24290	0.099	0.072	1.104	0.171	0.027	0.072	1.027	0.71	8510	88	8422	-0.135275	0.111173	0.873475	0.223678	0.0386799	0.111124	1.03944	0.727781
Complication of amputation stump	injuries & poisonings	874	logistic	27145	28	27117	0.26	0.19	1.297	0.171	-0.026	0.188	0.975	0.891	9078	35	9043	0.0183833	0.178728	1.01855	0.918077	-0.0164802	0.178137	0.983655	0.926289
Neoplasm of unspecified nature of digestive system	neoplasms	158	logistic	26139	186	25953	-0.101	0.074	0.904	0.172	-0.044	0.074	0.957	0.547	9479	50	9429	-0.100964	0.142643	0.903966	0.479067	0.0419168	0.146107	1.04281	0.774196
Acquired foot deformities	musculoskeletal	735	logistic	27293	485	26808	0.063	0.046	1.065	0.173	0.052	0.046	1.053	0.261	9336	384	8952	-0.0328648	0.0542177	0.967669	0.544406	-0.0306776	0.0549262	0.969788	0.576487
Fracture of hand or wrist	injuries & poisonings	804	logistic	27054	196	26858	-0.098	0.072	0.907	0.173	-0.022	0.072	0.978	0.76	9213	133	9080	0.179751	0.0905965	1.19692	0.0472467	0.100525	0.0910727	1.10575	0.269687
Graft-versus-host disease	infectious diseases	81.1	logistic	27712	45	27667	0.202	0.149	1.224	0.174	0.053	0.149	1.054	0.723	9677	3	9674	NA	NA	NA	NA	NA	NA	NA	NA
Obstructive sleep apnea	neurological	327.32	logistic	24028	2637	21391	0.028	0.021	1.029	0.174	0.02	0.021	1.021	0.326	8099	1701	6398	0.0302672	0.0282874	1.03073	0.284626	0.000179003	0.0287419	1.00018	0.995031
Other open wound of head and face	injuries & poisonings	870.3	logistic	27204	87	27117	-0.145	0.108	0.865	0.177	0.033	0.108	1.034	0.759	9104	61	9043	0.0593559	0.132184	1.06115	0.653404	-0.261705	0.132258	0.769738	0.0478436
Cardiac complications, not elsewhere classified	circulatory system	429.9	logistic	21131	65	21066	-0.17	0.126	0.844	0.178	0.15	0.125	1.162	0.23	7533	16	7517	NA	NA	NA	NA	NA	NA	NA	NA
Dental caries	digestive	521.1	logistic	27672	98	27574	0.137	0.101	1.147	0.178	-0.046	0.101	0.955	0.651	8922	110	8812	0.0376183	0.101282	1.03833	0.710324	0.0783784	0.102399	1.08153	0.444022
Sinoatrial node dysfunction (Bradycardia)	circulatory system	427.8	logistic	15897	735	15162	0.052	0.039	1.053	0.179	0.058	0.039	1.06	0.133	5400	109	5291	0.0461604	0.0994734	1.04724	0.642614	0.204405	0.102095	1.22679	0.0452742
Thoracic or lumbosacral neuritis or radiculitis, unspecified	symptoms	763	logistic	26275	902	25373	0.046	0.034	1.047	0.179	0.005	0.034	1.005	0.884	8368	535	7833	-0.0277968	0.0463977	0.972586	0.549107	-0.0124857	0.0470861	0.987592	0.790881
Hx of malignant neoplasm of oral cavity and pharynx	neoplasms	149.5	logistic	28505	168	28337	0.103	0.077	1.108	0.182	0.007	0.077	1.007	0.926	10185	18	10167	NA	NA	NA	NA	NA	NA	NA	NA
Hallux valgus (Bunion)	musculoskeletal	735.3	logistic	26968	160	26808	0.107	0.08	1.113	0.183	0.054	0.08	1.055	0.5	9099	147	8952	-0.0325685	0.0858108	0.967956	0.704288	-0.0327147	0.0869954	0.967815	0.706879
Other specified cardiac dysrhythmias	circulatory system	427.3	logistic	16044	882	15162	-0.046	0.035	0.955	0.184	-0.023	0.035	0.977	0.502	5698	407	5291	0.0612532	0.054005	1.06317	0.256704	-0.06582	0.0546595	0.936299	0.228519
Heart failure NOS	circulatory system	428.2	logistic	21229	163	21066	0.105	0.079	1.111	0.184	-0.061	0.079	0.941	0.44	7636	119	7517	0.00523758	0.0964716	1.00525	0.956703	0.139019	0.0966811	1.14915	0.150459
Renal colic	genitourinary	594.8	logistic	26935	28	26907	-0.251	0.189	0.778	0.185	0.504	0.189	1.656	0.00776	9667	7	9660	NA	NA	NA	NA	NA	NA	NA	NA
Drusen (degenerative) of retina	sense organs	362.27	logistic	26523	135	26388	-0.116	0.088	0.89	0.186	0.051	0.087	1.052	0.56	8287	54	8233	0.0393759	0.143377	1.04016	0.783598	-0.0362349	0.146477	0.964414	0.804617
Hydronephrosis	genitourinary	595	logistic	27155	248	26907	-0.085	0.064	0.919	0.186	-0.121	0.064	0.886	0.0567	9762	102	9660	-0.0562993	0.101906	0.945256	0.580631	-0.179106	0.102832	0.836017	0.0815543
Congenital anomalies of muscle, tendon, fascia, and connective tissue	congenital anomalies	756.3	logistic	28517	24	28493	0.272	0.206	1.313	0.186	-0.056	0.208	0.945	0.786	9990	1	9989	NA	NA	NA	NA	NA	NA	NA	NA
Complication of colostomy or enterostomy	injuries & poisonings	853	logistic	24323	33	24290	0.232	0.175	1.261	0.186	-0.102	0.174	0.903	0.558	8432	10	8422	NA	NA	NA	NA	NA	NA	NA	NA
Antepartum hemorrhage, abruptio placentae, and placenta previa	pregnancy complications	635.2	logistic	28479	88	28391	0.144	0.109	1.155	0.187	0.148	0.108	1.159	0.171	9469	113	9356	0.211127	0.103404	1.23507	0.0411755	-0.0264302	0.104638	0.973916	0.800587
Dermatitis due to solar radiation	dermatologic	938	logistic	23852	455	23397	-0.063	0.048	0.939	0.187	0.068	0.047	1.07	0.153	7425	12	7413	NA	NA	NA	NA	NA	NA	NA	NA
Organic or persistent insomnia	neurological	327.41	logistic	21434	43	21391	-0.203	0.154	0.817	0.188	-0.061	0.154	0.941	0.693	6425	27	6398	-0.068185	0.196213	0.934088	0.728212	-0.00750531	0.200848	0.992523	0.970191
Spasm of muscle	symptoms	772.2	logistic	27124	90	27034	0.14	0.106	1.15	0.188	0.001	0.106	1.001	0.993	8913	128	8785	0.0578438	0.0929867	1.05955	0.533899	-0.0310055	0.0942337	0.96947	0.742134
Other specified benign mammary dysplasias	genitourinary	610.8	logistic	26621	36	26585	0.223	0.169	1.249	0.189	-0.268	0.169	0.765	0.112	8432	19	8413	NA	NA	NA	NA	NA	NA	NA	NA
Urinary calculus	genitourinary	594	logistic	28043	1136	26907	0.04	0.03	1.041	0.191	-0.024	0.03	0.977	0.438	9959	299	9660	0.0497037	0.0599387	1.05096	0.406968	-0.0502559	0.0601672	0.950986	0.403566
Cardiac and circulatory congenital anomalies	congenital anomalies	747	logistic	28342	1260	27082	0.038	0.029	1.038	0.191	-0.01	0.029	0.99	0.733	10091	214	9877	-0.0999563	0.0694976	0.904877	0.150357	0.0109688	0.0710075	1.01103	0.877236
Fracture of lower limb	injuries & poisonings	800	logistic	27162	304	26858	0.075	0.058	1.078	0.193	-0.006	0.058	0.994	0.923	9262	182	9080	0.163851	0.077175	1.17804	0.033745	-0.116959	0.0777219	0.889621	0.132364
Chronic pulmonary heart disease	circulatory system	415.2	logistic	26491	1273	25218	0.038	0.029	1.038	0.195	-0.062	0.029	0.94	0.0331	9081	665	8416	0.00363165	0.0420682	1.00364	0.931206	0.042245	0.0424387	1.04315	0.319524
Stomatitis and mucositis (ulcerative)	digestive	528.11	logistic	27051	33	27018	-0.228	0.176	0.796	0.195	-0.169	0.174	0.845	0.331	9428	6	9422	NA	NA	NA	NA	NA	NA	NA	NA
Chronic ulcer of leg or foot	dermatologic	707.2	logistic	28390	238	28152	-0.085	0.065	0.919	0.195	-0.126	0.065	0.882	0.0534	9897	201	9696	0.103987	0.0747162	1.10959	0.163997	0.197376	0.0756469	1.2182	0.00907609
Other disorders of stomach and duodenum	digestive	537	logistic	26451	358	26093	-0.069	0.053	0.933	0.196	-0.028	0.053	0.973	0.6	8631	208	8423	-0.0363107	0.0715212	0.964341	0.611669	-0.0111395	0.0724962	0.988922	0.877881
Optic atrophy	sense organs	377.1	logistic	26479	47	26432	-0.189	0.148	0.827	0.199	0.248	0.146	1.281	0.0903	8370	47	8323	0.109507	0.153158	1.11573	0.474614	0.140708	0.156752	1.15109	0.369376
Aortic ectasia	circulatory system	447.7	logistic	23322	425	22897	0.063	0.049	1.065	0.199	0.006	0.049	1.006	0.903	8468	57	8411	-0.0402699	0.134811	0.96053	0.765158	0.00593487	0.134876	1.00595	0.964902
Urinary complications NEC	genitourinary	597.2	logistic	26838	28	26810	-0.245	0.191	0.783	0.199	-0.21	0.19	0.811	0.27	9340	15	9325	NA	NA	NA	NA	NA	NA	NA	NA
Disorders of sweat glands	dermatologic	705	logistic	26057	136	25921	-0.111	0.086	0.895	0.199	0.036	0.086	1.037	0.672	8454	136	8318	0.0420937	0.0889144	1.04299	0.635915	0.00998179	0.0898627	1.01003	0.911554
Other hypertrophic cardiomyopathy	circulatory system	425.12	logistic	24670	138	24532	0.11	0.086	1.116	0.2	0.061	0.086	1.063	0.474	8671	39	8632	0.278215	0.166368	1.32077	0.0944676	-0.0627353	0.16766	0.939192	0.708268
Deep vein thrombosis [DVT]	circulatory system	452.2	logistic	20670	831	19839	0.045	0.035	1.046	0.2	-0.001	0.035	0.999	0.983	6967	477	6490	0.078677	0.0494587	1.08185	0.111663	0.000131786	0.0501431	1.00013	0.997903
Ankylosing spondylitis	musculoskeletal	715.2	logistic	26105	45	26060	0.191	0.149	1.211	0.2	0.052	0.149	1.053	0.727	8639	12	8627	NA	NA	NA	NA	NA	NA	NA	NA
Mycoses	infectious diseases	117	logistic	25823	150	25673	0.105	0.082	1.11	0.201	0.037	0.082	1.038	0.647	7690	53	7637	-0.37256	0.143796	0.688969	0.00957262	0.118667	0.143558	1.126	0.408456
Abnormal weight gain	endocrine/metabolic	278.4	logistic	20718	321	20397	0.073	0.057	1.076	0.201	0.017	0.057	1.017	0.764	5038	233	4805	0.0191673	0.071037	1.01935	0.787298	-0.122301	0.0720968	0.884882	0.089822
Encounter for long-term (current) use of antiplatelets/antithrombotics	circulatory system	457.2	logistic	20022	183	19839	0.095	0.074	1.1	0.201	0.02	0.074	1.02	0.785	6572	82	6490	0.198613	0.115851	1.21971	0.0864597	0.0353342	0.116068	1.03597	0.760803
Myeloid leukemia	neoplasms	204.2	logistic	27402	117	27285	0.118	0.093	1.125	0.203	-0.053	0.092	0.948	0.566	9868	19	9849	NA	NA	NA	NA	NA	NA	NA	NA
Abnormal coagulation profile	hematopoietic	286.9	logistic	20870	129	20741	0.113	0.089	1.119	0.203	0.091	0.088	1.095	0.306	8121	148	7973	0.182466	0.0870508	1.20017	0.0360749	0.126712	0.0881002	1.13509	0.150357
Lymphadenitis	hematopoietic	289.4	logistic	24787	821	23966	0.045	0.036	1.046	0.203	0.016	0.036	1.017	0.645	8313	349	7964	0.0461997	0.0565746	1.04728	0.414148	0.0660876	0.0572227	1.06832	0.248123
Chronic glomerulonephritis, NOS	genitourinary	580.14	logistic	21463	26	21437	0.25	0.196	1.284	0.203	0.579	0.198	1.783	0.00342	6256	23	6233	0.202682	0.219874	1.22468	0.356627	0.155682	0.222709	1.16845	0.484529
Other pulmonary inflamation or edema	respiratory	505	logistic	24039	29	24010	0.236	0.186	1.266	0.204	-0.051	0.185	0.95	0.783	8184	24	8160	0.0271892	0.217623	1.02756	0.900573	0.317411	0.222192	1.37357	0.153136
Cellulitis and abscess of fingers/toes	dermatologic	681.1	logistic	25749	87	25662	0.137	0.108	1.147	0.204	0.189	0.107	1.208	0.079	8109	77	8032	-0.0661916	0.1196	0.935952	0.579962	-0.112211	0.121195	0.893855	0.354513
Osteomyelitis, periostitis, and other infections involving bone	musculoskeletal	710	logistic	26495	236	26259	-0.083	0.066	0.921	0.208	0.072	0.065	1.074	0.272	8685	164	8521	-0.042225	0.0832418	0.958654	0.611974	0.208495	0.0845754	1.23182	0.0136938
Dry eyes	sense organs	375.1	logistic	26689	257	26432	-0.08	0.063	0.923	0.209	0.011	0.063	1.011	0.859	8482	159	8323	-0.109516	0.0816897	0.896267	0.180038	-0.0784357	0.0840001	0.924562	0.350429
Other arthropathies	musculoskeletal	716	logistic	26669	410	26259	0.063	0.05	1.065	0.21	0.026	0.05	1.027	0.601	8877	356	8521	0.0386041	0.0564715	1.03936	0.494226	0.0169341	0.0571131	1.01708	0.766848
Localized adiposity	endocrine/metabolic	278.3	logistic	20471	74	20397	0.148	0.118	1.159	0.211	0.03	0.118	1.03	0.799	4855	50	4805	-0.0205611	0.148549	0.979649	0.889914	-0.0633639	0.152679	0.938602	0.678131
Other disorders of bladder	genitourinary	596	logistic	27517	707	26810	-0.048	0.038	0.953	0.211	0.018	0.038	1.019	0.631	9637	312	9325	-0.110972	0.0598551	0.894963	0.0637363	-0.0880424	0.0603749	0.915722	0.144769
Alteration of consciousness	mental disorders	291.8	logistic	25477	72	25405	-0.148	0.118	0.863	0.212	-0.03	0.118	0.97	0.798	8433	63	8370	0.269397	0.132757	1.30917	0.0424328	0.240123	0.132888	1.27141	0.0707679
Esophageal bleeding (varices/hemorrhage)	digestive	530.2	logistic	18749	258	18491	0.078	0.063	1.081	0.212	-0.106	0.062	0.899	0.088	5812	89	5723	0.158204	0.112147	1.17141	0.158336	-0.0190446	0.113931	0.981136	0.867245
E. coli	infectious diseases	41.4	logistic	25323	75	25248	-0.145	0.116	0.865	0.213	-0.093	0.116	0.911	0.421	8223	64	8159	0.114614	0.128989	1.12144	0.374241	-0.0342395	0.133012	0.96634	0.796856
Cancer of esophagus	neoplasms	150	logistic	26067	114	25953	-0.117	0.094	0.89	0.213	-0.004	0.093	0.996	0.968	9442	13	9429	NA	NA	NA	NA	NA	NA	NA	NA
Asthma	respiratory	495	logistic	24802	1879	22923	0.03	0.024	1.031	0.213	0.027	0.024	1.028	0.257	8738	1696	7042	-0.013295	0.028425	0.986793	0.639983	0.00244372	0.0289409	1.00245	0.932708
Uterine leiomyoma	neoplasms	218.1	logistic	26928	285	26643	-0.075	0.061	0.928	0.214	-0.063	0.061	0.939	0.302	9382	575	8807	0.0821172	0.046005	1.08558	0.0742672	-0.0386164	0.0468539	0.96212	0.409834
Gastrointestinal hemorrhage	digestive	578	logistic	26791	1134	25657	-0.038	0.03	0.963	0.214	-0.015	0.03	0.986	0.631	9098	819	8279	-0.0116146	0.0381786	0.988453	0.760962	0.068777	0.0389167	1.0712	0.07718
Otitis media and Eustachian tube disorders	sense organs	381	logistic	27523	518	27005	0.055	0.044	1.057	0.215	0.105	0.044	1.11	0.0185	9298	249	9049	0.057735	0.0662284	1.05943	0.383342	0.0612797	0.0673018	1.0632	0.362547
Ascites (non malignant)	digestive	572	logistic	24817	439	24378	0.06	0.048	1.062	0.215	-0.102	0.048	0.903	0.0335	8286	111	8175	0.116028	0.100695	1.12303	0.249208	0.0285116	0.101248	1.02892	0.778249
Osteoporosis NOS	musculoskeletal	743.11	logistic	26832	1038	25794	-0.041	0.033	0.96	0.215	-0.03	0.033	0.97	0.358	9467	236	9231	-0.0155134	0.0691279	0.984606	0.822434	0.0572765	0.0702908	1.05895	0.415157
Hereditary hemochromatosis	hematopoietic	275.11	logistic	25249	23	25226	-0.26	0.21	0.771	0.216	0.034	0.208	1.035	0.869	8373	NA	NA	NA	NA	NA	NA	NA	NA	NA	NA
Pleurisy; pleural effusion	respiratory	507	logistic	24689	679	24010	0.048	0.039	1.049	0.216	0.003	0.039	1.003	0.948	8368	208	8160	0.00577124	0.0721463	1.00579	0.936242	-0.00724227	0.0729285	0.992784	0.920895
Diseases of hard tissues of teeth	digestive	521	logistic	27679	105	27574	0.121	0.098	1.129	0.216	-0.084	0.098	0.919	0.388	8930	118	8812	0.0378813	0.0980305	1.03861	0.699183	0.0558961	0.0990738	1.05749	0.572627
Other specified diseases of sebaceous glands	dermatologic	706.8	logistic	26013	92	25921	-0.13	0.106	0.878	0.216	0.205	0.105	1.228	0.0503	8370	52	8318	0.123941	0.145124	1.13195	0.393087	0.114489	0.146627	1.1213	0.434912
Fracture of unspecified part of femur	injuries & poisonings	800.2	logistic	26927	69	26858	0.149	0.121	1.161	0.216	-0.037	0.121	0.963	0.758	9108	28	9080	0.244367	0.203124	1.27681	0.228958	-0.154164	0.204732	0.857132	0.451448
Congenital anomalies of female genital organs	congenital anomalies	751.11	logistic	28240	21	28219	0.273	0.221	1.314	0.217	-0.269	0.223	0.764	0.229	9925	11	9914	NA	NA	NA	NA	NA	NA	NA	NA
Other specified congenital anomalies of nervous system	congenital anomalies	752.2	logistic	28832	28	28804	0.234	0.19	1.264	0.217	-0.064	0.19	0.938	0.735	10151	6	10145	NA	NA	NA	NA	NA	NA	NA	NA
Cancer of larynx, pharynx, nasal cavities	neoplasms	149	logistic	28743	406	28337	0.062	0.05	1.063	0.218	-0.042	0.05	0.958	0.395	10210	43	10167	0.244969	0.155348	1.27758	0.114818	0.148772	0.155609	1.16041	0.339042
Polycystic ovaries	endocrine/metabolic	256.4	logistic	26086	241	25845	0.082	0.067	1.086	0.219	0.056	0.067	1.057	0.408	8773	178	8595	-0.0178025	0.079565	0.982355	0.822953	0.153067	0.0822142	1.1654	0.0626298
Atrioventricular [AV] block	circulatory system	426.2	logistic	16065	903	15162	0.043	0.035	1.044	0.22	-0.007	0.035	0.993	0.836	5527	236	5291	-0.0201514	0.0695553	0.98005	0.772032	0.0580373	0.0704012	1.05975	0.409724
Human immunodeficiency virus [HIV] disease	infectious diseases	71	logistic	24862	143	24719	0.102	0.083	1.107	0.221	-0.184	0.083	0.832	0.0264	7599	343	7256	-0.0253149	0.0581319	0.975003	0.663219	0.00741749	0.0587824	1.00745	0.899585
Congenital anomalies of limbs	congenital anomalies	755	logistic	28538	45	28493	0.184	0.151	1.203	0.221	0.071	0.15	1.074	0.635	10022	33	9989	-0.112508	0.177592	0.89359	0.526396	0.276546	0.182324	1.31857	0.129322
Hidradenitis	dermatologic	705.3	logistic	25942	21	25921	-0.269	0.22	0.764	0.222	-0.119	0.219	0.888	0.588	8381	63	8318	-0.0825384	0.132434	0.920776	0.533126	-0.137493	0.134267	0.87154	0.305822
Rheumatoid arthritis and other inflammatory polyarthropathies	musculoskeletal	714	logistic	26488	428	26060	0.06	0.049	1.062	0.222	0.042	0.049	1.043	0.392	8919	292	8627	0.0197582	0.0621458	1.01995	0.750535	-0.0480325	0.0628421	0.953103	0.444667
Sprains and strains	injuries & poisonings	840	logistic	27507	1232	26275	0.036	0.029	1.036	0.223	0.025	0.029	1.026	0.384	8733	890	7843	0.0623211	0.0365629	1.0643	0.0882896	0.00957894	0.0371918	1.00962	0.79675
Macular degeneration, wet	sense organs	362.22	logistic	26442	54	26388	-0.167	0.137	0.847	0.224	0.076	0.136	1.079	0.575	8242	9	8233	NA	NA	NA	NA	NA	NA	NA	NA
Corneal degenerations	sense organs	364.4	logistic	26727	22	26705	0.261	0.214	1.298	0.224	-0.047	0.215	0.955	0.828	8559	25	8534	0.0225753	0.21011	1.02283	0.914436	0.044319	0.214252	1.04532	0.836123
Transient alteration of awareness	mental disorders	292.5	logistic	25433	28	25405	-0.231	0.191	0.794	0.225	-0.237	0.189	0.789	0.208	8386	16	8370	NA	NA	NA	NA	NA	NA	NA	NA
Cataract	sense organs	366	logistic	27939	1514	26425	-0.033	0.027	0.968	0.225	-0.015	0.027	0.985	0.588	9418	1269	8149	0.0281743	0.0343743	1.02857	0.412425	0.0314814	0.0344476	1.03198	0.360775
Hirsutism	dermatologic	704.2	logistic	27149	33	27116	0.212	0.175	1.236	0.226	0.11	0.174	1.116	0.528	9055	42	9013	0.135991	0.162881	1.14567	0.40377	0.113143	0.165712	1.11979	0.494756
Fracture of tibia and fibula	injuries & poisonings	800.3	logistic	26940	82	26858	0.134	0.111	1.144	0.226	0.11	0.111	1.116	0.323	9149	69	9080	0.155818	0.123421	1.16861	0.206771	-0.246455	0.125237	0.781567	0.0490788
Benign neoplasm of thyroid glands	neoplasms	226	logistic	27758	45	27713	-0.181	0.151	0.834	0.228	-0.183	0.15	0.833	0.224	9904	12	9892	NA	NA	NA	NA	NA	NA	NA	NA
Benign neoplasm of uterus	neoplasms	218	logistic	26929	286	26643	-0.073	0.06	0.93	0.229	-0.068	0.061	0.934	0.258	9385	578	8807	0.0814299	0.0459154	1.08484	0.07615	-0.0415331	0.0467576	0.959318	0.374398
Acne	dermatologic	706.1	logistic	26222	301	25921	-0.071	0.059	0.931	0.229	0.057	0.059	1.059	0.328	8462	144	8318	-0.0298933	0.0868336	0.970549	0.730651	-0.0277133	0.0884562	0.972667	0.754053
Diffuse diseases of connective tissue	dermatologic	709	logistic	24252	370	23882	-0.064	0.053	0.938	0.23	0.013	0.053	1.013	0.8	8115	187	7928	-0.084884	0.0762127	0.918619	0.265375	0.0703398	0.0782147	1.07287	0.368484
Hyperglyceridemia	endocrine/metabolic	272.12	logistic	14351	267	14084	0.074	0.062	1.077	0.233	-0.052	0.062	0.949	0.403	5296	106	5190	0.0194653	0.101969	1.01966	0.848608	0.0153948	0.105736	1.01551	0.88424
Myocarditis	circulatory system	420.1	logistic	24560	28	24532	0.226	0.19	1.254	0.233	0.064	0.189	1.067	0.733	8648	16	8632	NA	NA	NA	NA	NA	NA	NA	NA
Alcoholic liver damage	mental disorders	317.11	logistic	20783	167	20616	0.092	0.077	1.096	0.235	-0.079	0.077	0.924	0.304	6113	60	6053	0.307026	0.136499	1.35938	0.024494	-0.00865256	0.13571	0.991385	0.949163
Glossodynia	digestive	529.6	logistic	27047	29	27018	-0.223	0.187	0.8	0.235	0.086	0.186	1.09	0.645	9426	4	9422	NA	NA	NA	NA	NA	NA	NA	NA
Type 2 diabetes with neurological manifestations	endocrine/metabolic	250.24	logistic	20856	397	20459	0.06	0.051	1.062	0.236	-0.051	0.051	0.95	0.31	5930	461	5469	0.0380844	0.0515821	1.03882	0.460317	0.00469496	0.0519114	1.00471	0.927936
Swelling, mass, or lump in head and neck [Space-occupying lesion, intracranial NOS]	mental disorders	293.1	logistic	28267	489	27778	-0.054	0.046	0.947	0.236	-0.009	0.046	0.991	0.841	9508	289	9219	-0.0123559	0.0624235	0.98772	0.843095	0.0191953	0.0633825	1.01938	0.762005
Other diseases of blood and blood-forming organs	hematopoietic	289	logistic	24713	747	23966	0.044	0.037	1.045	0.237	-0.012	0.037	0.988	0.746	8316	352	7964	0.0594509	0.0563069	1.06125	0.291043	0.0398538	0.056861	1.04066	0.483366
Acute vascular insufficiency of intestine	circulatory system	441.1	logistic	22921	24	22897	-0.24	0.204	0.786	0.239	-0.26	0.205	0.771	0.204	8417	6	8411	NA	NA	NA	NA	NA	NA	NA	NA
Pituitary hypofunction	endocrine/metabolic	253.2	logistic	25936	91	25845	0.123	0.105	1.131	0.24	0.185	0.105	1.203	0.0786	8622	27	8595	-0.230765	0.20909	0.793926	0.269739	0.0964654	0.213812	1.10127	0.651867
Streptococcus infection	infectious diseases	41.2	logistic	25372	124	25248	0.105	0.09	1.111	0.242	-0.066	0.09	0.936	0.461	8220	61	8159	-0.12226	0.13057	0.884918	0.349089	-0.120393	0.133748	0.886572	0.368042
Intracranial hemorrhage (injury)	injuries & poisonings	818	logistic	28507	70	28437	0.14	0.12	1.15	0.242	-0.157	0.12	0.854	0.19	9923	34	9889	0.0512951	0.179879	1.05263	0.775518	0.316772	0.180481	1.37269	0.0792318
Cancer of kidney and renal pelvis	neoplasms	189.1	logistic	28319	584	27735	0.049	0.042	1.05	0.243	-0.006	0.042	0.994	0.88	10135	189	9946	0.0414263	0.0762672	1.0423	0.58701	0.137406	0.0768001	1.14729	0.0735918
Mastodynia	genitourinary	613.5	logistic	28250	166	28084	0.092	0.079	1.096	0.243	0.145	0.078	1.156	0.0635	9560	195	9365	0.0665264	0.0760435	1.06879	0.381657	0.0386617	0.077399	1.03942	0.617419
Cancer of other lymphoid, histiocytic tissue	neoplasms	202	logistic	27962	677	27285	-0.045	0.039	0.956	0.244	0.003	0.039	1.003	0.942	9963	114	9849	0.0298067	0.0956792	1.03026	0.755399	0.193599	0.096261	1.21361	0.0443051
Respiratory abnormalities	respiratory	513	logistic	28477	179	28298	-0.088	0.075	0.916	0.244	0.067	0.075	1.07	0.369	9823	161	9662	0.0361826	0.0834175	1.03685	0.664467	0.0486684	0.0841429	1.04987	0.562993
Calculus of kidney	genitourinary	594.1	logistic	27763	856	26907	0.041	0.035	1.041	0.244	-0.01	0.035	0.99	0.766	9882	222	9660	-0.0220528	0.0688158	0.978189	0.748618	-0.0825057	0.0689935	0.920806	0.231756
Hypertrophy of female genital organs	genitourinary	623	logistic	28542	38	28504	0.19	0.163	1.21	0.244	-0.009	0.164	0.991	0.957	9758	45	9713	-0.00286624	0.159279	0.997138	0.985643	0.209776	0.164861	1.2334	0.203215
Spermatocele	genitourinary	603.2	logistic	23812	31	23781	-0.209	0.18	0.811	0.245	-0.229	0.18	0.796	0.203	8428	11	8417	NA	NA	NA	NA	NA	NA	NA	NA
Other and unspecified congenital anomalies	congenital anomalies	759	logistic	28453	117	28336	-0.108	0.093	0.897	0.245	-0.052	0.093	0.949	0.575	9995	24	9971	0.0702537	0.209605	1.07278	0.737496	-0.0350721	0.213721	0.965536	0.869651
Poisoning by agents primarily affecting blood constituents	injuries & poisonings	964	logistic	22696	68	22628	-0.142	0.122	0.868	0.245	0.011	0.121	1.011	0.93	7597	36	7561	0.0137581	0.173455	1.01385	0.93678	-0.0491634	0.177729	0.952026	0.782072
Heart valve replaced	circulatory system	395.6	logistic	23435	1472	21963	0.032	0.028	1.033	0.246	-0.039	0.028	0.962	0.158	8571	203	8368	-0.0697827	0.0729683	0.932596	0.338899	-0.0466818	0.0741159	0.954391	0.528793
Venous/cerebrovascular complications embolism in pregnancy and the puerperium	pregnancy complications	671	logistic	28936	55	28881	-0.158	0.137	0.853	0.246	0.163	0.136	1.177	0.229	10106	51	10055	0.00343424	0.145948	1.00344	0.981227	0.083427	0.148359	1.08701	0.573889
Nontoxic multinodular goiter	endocrine/metabolic	241.2	logistic	22844	529	22315	-0.052	0.045	0.95	0.247	-0.036	0.045	0.965	0.421	8489	282	8207	-0.0343543	0.0638183	0.966229	0.590361	-0.0552509	0.0641595	0.946248	0.389156
Irregular menstrual bleeding	genitourinary	626.14	logistic	25442	55	25387	0.159	0.137	1.172	0.247	-0.012	0.136	0.988	0.93	7489	69	7420	-0.345094	0.128082	0.708154	0.00705307	0.0811456	0.132145	1.08453	0.539174
Chorioretinal inflammations, scars, and other disorders of choroid	sense organs	363	logistic	26725	20	26705	0.26	0.225	1.297	0.248	0.538	0.224	1.713	0.016	8552	18	8534	NA	NA	NA	NA	NA	NA	NA	NA
Intracerebral hemorrhage	circulatory system	430.2	logistic	24709	78	24631	-0.132	0.114	0.877	0.248	-0.106	0.114	0.899	0.35	8691	43	8648	0.0659086	0.154455	1.06813	0.669586	-0.0909938	0.155951	0.913023	0.559572
Pyelonephritis	genitourinary	590	logistic	23478	191	23287	-0.084	0.073	0.919	0.249	0.007	0.073	1.007	0.919	7087	195	6892	0.130857	0.0751238	1.13981	0.0815277	-0.174557	0.0758141	0.839829	0.0213109
Diseases of spleen	hematopoietic	289.5	logistic	24007	41	23966	0.178	0.155	1.195	0.25	0.121	0.157	1.128	0.442	7984	20	7964	0.222395	0.243037	1.24907	0.360156	0.298907	0.247422	1.34838	0.227013
Iatrogenic hypotension	circulatory system	458.2	logistic	23759	42	23717	0.177	0.154	1.194	0.25	-0.095	0.155	0.91	0.542	7502	42	7460	0.159354	0.161251	1.17275	0.323039	-0.0568346	0.162894	0.94475	0.72716
Heart valve disorders	circulatory system	395	logistic	26616	4653	21963	0.02	0.017	1.02	0.251	-0.043	0.017	0.958	0.0119	9194	826	8368	-0.0310995	0.0385932	0.969379	0.420342	-0.0745691	0.0388041	0.928143	0.0546458
Peptic ulcer (excl. esophageal)	digestive	531	logistic	28579	339	28240	0.063	0.055	1.065	0.251	0.079	0.055	1.082	0.149	10009	202	9807	0.0328942	0.0733641	1.03344	0.653886	-0.00329283	0.0744531	0.996713	0.964724
Appendicitis	digestive	540.1	logistic	29047	94	28953	0.119	0.103	1.126	0.251	-0.152	0.103	0.859	0.143	10262	52	10210	0.0915733	0.147679	1.0959	0.535203	-0.160612	0.148627	0.851623	0.279858
Systemic lupus erythematosus	dermatologic	695.42	logistic	24121	165	23956	0.09	0.079	1.094	0.251	-0.017	0.079	0.983	0.826	8155	218	7937	-0.0535318	0.070854	0.947876	0.449936	0.0990033	0.072791	1.10407	0.173797
Palpitations	circulatory system	427.9	logistic	17134	1972	15162	-0.027	0.024	0.973	0.252	-0.002	0.024	0.998	0.948	6018	727	5291	0.0616279	0.0406961	1.06357	0.129939	0.0511599	0.0411032	1.05249	0.213253
Unspecified diffuse connective tissue disease	dermatologic	709.7	logistic	23984	102	23882	-0.115	0.1	0.892	0.252	-0.103	0.1	0.902	0.302	7993	65	7928	-0.0562786	0.129646	0.945276	0.664221	0.0375002	0.134005	1.03821	0.779599
Multiple sclerosis	neurological	335	logistic	25219	239	24980	-0.075	0.065	0.928	0.253	-0.087	0.066	0.916	0.185	8468	99	8369	0.031524	0.102653	1.03203	0.758773	-0.0408604	0.105111	0.959963	0.697473
Disorder of skin and subcutaneous tissue NOS	dermatologic	689	logistic	27749	285	27464	-0.068	0.06	0.934	0.253	0.025	0.059	1.026	0.67	9627	119	9508	0.0521766	0.0937745	1.05356	0.577934	0.151761	0.0952322	1.16388	0.111028
Loss of height	symptoms	781.1	logistic	28205	32	28173	0.204	0.179	1.227	0.253	0.131	0.179	1.14	0.464	9502	3	9499	NA	NA	NA	NA	NA	NA	NA	NA
Symptoms affecting skin	dermatologic	687	logistic	24895	1393	23502	0.031	0.028	1.032	0.257	-0.008	0.028	0.992	0.767	7443	938	6505	0.00252514	0.0365557	1.00253	0.944929	-0.025446	0.0368744	0.974875	0.490149
Cancer of brain and nervous system	neoplasms	191.1	logistic	28463	211	28252	0.078	0.069	1.081	0.259	-0.166	0.069	0.847	0.0164	10129	18	10111	NA	NA	NA	NA	NA	NA	NA	NA
Diabetes insipidus	endocrine/metabolic	253.3	logistic	25878	33	25845	-0.198	0.175	0.82	0.259	0.279	0.174	1.321	0.11	8609	14	8595	NA	NA	NA	NA	NA	NA	NA	NA
Chronic ulcer of unspecified site	dermatologic	707.3	logistic	28198	46	28152	0.166	0.148	1.181	0.26	0.007	0.148	1.007	0.961	9740	44	9696	0.142167	0.161348	1.15277	0.378252	0.0870372	0.16625	1.09094	0.600604
Osteomyelitis	musculoskeletal	710.1	logistic	26492	233	26259	-0.074	0.066	0.928	0.26	0.069	0.066	1.072	0.292	8685	164	8521	-0.042225	0.0832418	0.958654	0.611974	0.208495	0.0845754	1.23182	0.0136938
Synoviopathy	musculoskeletal	726.2	logistic	23552	79	23473	-0.126	0.112	0.881	0.261	0.09	0.113	1.094	0.427	6792	59	6733	0.203124	0.135059	1.22522	0.132592	-0.0153568	0.137659	0.984761	0.911175
Sleep related leg cramps	neurological	327.72	logistic	21420	29	21391	0.211	0.188	1.235	0.262	-0.161	0.187	0.851	0.389	6405	7	6398	NA	NA	NA	NA	NA	NA	NA	NA
Other forms of chronic heart disease	circulatory system	414	logistic	20865	618	20247	0.047	0.041	1.048	0.262	-0.078	0.042	0.925	0.062	7977	265	7712	0.111663	0.064952	1.11814	0.0855838	0.209974	0.0656431	1.23365	0.00138041
Lupus (localized and systemic)	dermatologic	695.4	logistic	24145	189	23956	0.082	0.074	1.086	0.262	0.004	0.074	1.004	0.961	8171	234	7937	-0.0414632	0.0684541	0.959385	0.544708	0.138998	0.0702267	1.14912	0.0477845
Benign neoplasm of eye, uveal	neoplasms	224.1	logistic	28363	111	28252	0.107	0.096	1.113	0.264	-0.014	0.095	0.986	0.884	10125	14	10111	NA	NA	NA	NA	NA	NA	NA	NA
Vaginitis and vulvovaginitis	genitourinary	614.52	logistic	28160	80	28080	0.126	0.113	1.135	0.264	-0.033	0.113	0.967	0.768	8915	399	8516	-0.0273629	0.0561761	0.973008	0.626194	-0.0293903	0.0570982	0.971037	0.60674
Hypertension	circulatory system	401	logistic	24965	11526	13439	0.016	0.015	1.016	0.268	-0.02	0.014	0.98	0.165	9298	5811	3487	0.0298776	0.0266318	1.03033	0.261914	0.0470199	0.0269789	1.04814	0.0813623
Primary biliary cirrhosis	digestive	571.6	logistic	24438	60	24378	-0.144	0.13	0.866	0.268	0.05	0.13	1.051	0.7	8183	8	8175	NA	NA	NA	NA	NA	NA	NA	NA
Diseases and other conditions of the tongue	digestive	529	logistic	27159	141	27018	-0.094	0.085	0.911	0.27	-0.04	0.085	0.96	0.633	9450	28	9422	0.201086	0.189306	1.22273	0.288132	0.143185	0.192237	1.15394	0.456369
Anemia in chronic kidney disease	hematopoietic	285.21	logistic	20354	273	20081	0.067	0.061	1.07	0.271	-0.053	0.061	0.948	0.383	5577	376	5201	0.0121814	0.0571098	1.01226	0.831095	-0.0509889	0.0577454	0.950289	0.377239
Cardiomyopathy	circulatory system	425	logistic	26799	2267	24532	0.024	0.022	1.025	0.271	-0.03	0.022	0.971	0.183	9607	975	8632	0.0261232	0.0352317	1.02647	0.458408	0.050113	0.0356322	1.05139	0.159606
Atrial fibrillation	circulatory system	427.21	logistic	20157	4995	15162	0.02	0.018	1.02	0.271	-0.026	0.018	0.975	0.152	6120	829	5291	0.0736182	0.0399521	1.0764	0.0653786	0.0124876	0.0405119	1.01257	0.757895
Cyst and pseudocyst of pancreas	digestive	577.3	logistic	28374	233	28141	-0.073	0.066	0.93	0.271	0.085	0.066	1.088	0.201	9951	66	9885	-0.0149805	0.125579	0.985131	0.905044	-0.0450051	0.12716	0.955993	0.723395
Superficial cellulitis and abscess	dermatologic	681	logistic	26892	1230	25662	0.032	0.029	1.033	0.271	0.026	0.029	1.027	0.365	8937	905	8032	-0.023165	0.0363059	0.977101	0.52344	-0.00545477	0.036682	0.99456	0.881787
Other conditions of brain, NOS	neurological	348.9	logistic	25134	154	24980	0.089	0.081	1.093	0.272	0.019	0.081	1.02	0.812	8407	38	8369	0.336723	0.172087	1.40035	0.0503834	0.0846885	0.169893	1.08838	0.618145
Osteoarthrosis involving more than one site, but not specified as generalized	musculoskeletal	740.3	logistic	23745	21	23724	-0.244	0.222	0.784	0.272	-0.082	0.219	0.921	0.709	6987	27	6960	-0.136675	0.202053	0.872253	0.498765	0.112034	0.206626	1.11855	0.587675
Myocardial infarction	circulatory system	411.2	logistic	21916	1669	20247	0.029	0.027	1.03	0.273	-0.026	0.027	0.975	0.334	8350	638	7712	0.0765018	0.0437591	1.0795	0.0804209	0.0127846	0.0436619	1.01287	0.769668
Muscular dystrophies	neurological	359.1	logistic	27106	24	27082	0.225	0.205	1.252	0.274	-0.342	0.205	0.71	0.0956	9319	8	9311	NA	NA	NA	NA	NA	NA	NA	NA
Osteoporosis	musculoskeletal	743.1	logistic	26885	1091	25794	-0.035	0.032	0.966	0.274	-0.018	0.032	0.982	0.57	9489	258	9231	-0.0147391	0.065917	0.985369	0.823068	0.0692038	0.0669825	1.07165	0.301527
Hearing loss	sense organs	389	logistic	27872	2202	25670	0.024	0.022	1.025	0.276	0.023	0.022	1.024	0.295	9753	705	9048	0.0152865	0.0410982	1.0154	0.709929	0.0340192	0.0414279	1.0346	0.411552
Chronic sinusitis	respiratory	475	logistic	23250	1467	21783	0.03	0.027	1.03	0.276	0.028	0.027	1.029	0.29	6662	501	6161	0.0351845	0.0479661	1.03581	0.463236	-0.0225233	0.0489215	0.977728	0.645231
Adrenal hypofunction	endocrine/metabolic	255.2	logistic	25997	152	25845	0.089	0.082	1.093	0.277	0.056	0.081	1.058	0.492	8650	55	8595	0.211053	0.141411	1.23498	0.135573	0.158857	0.142357	1.17217	0.264464
Hemorrhoids	circulatory system	455	logistic	20574	735	19839	0.041	0.038	1.042	0.278	0.031	0.038	1.032	0.406	6949	459	6490	-0.00865243	0.0507137	0.991385	0.864528	0.0492604	0.0508522	1.05049	0.332696
Other congenital musculoskeletal anomalies	congenital anomalies	756	logistic	28649	156	28493	0.087	0.08	1.091	0.278	0.04	0.081	1.041	0.617	10036	47	9989	-0.042525	0.148975	0.958366	0.775298	0.172022	0.151966	1.1877	0.257645
Cardiogenic shock	symptoms	797.1	logistic	28247	113	28134	0.102	0.094	1.107	0.278	-0.003	0.094	0.997	0.973	9926	70	9856	-0.121005	0.121316	0.886029	0.318554	0.0389891	0.123668	1.03976	0.752555
Anticoagulants causing adverse effects	injuries & poisonings	964.1	logistic	22686	58	22628	-0.142	0.132	0.867	0.279	-0.027	0.131	0.974	0.839	7593	32	7561	0.0797088	0.182647	1.08297	0.662541	-0.132948	0.187161	0.875511	0.477495
Other and unspecified coagulation defects	hematopoietic	286.7	logistic	20808	67	20741	0.132	0.122	1.141	0.28	0.206	0.122	1.229	0.0917	7999	26	7973	-0.178853	0.199328	0.836229	0.36957	0.0300683	0.200254	1.03052	0.880645
Corneal opacity and other disorders of cornea	sense organs	364	logistic	26794	89	26705	0.115	0.107	1.122	0.281	0.061	0.106	1.063	0.569	8590	56	8534	-0.0183844	0.137698	0.981784	0.893788	0.0381587	0.139903	1.0389	0.785045
Parkinson's disease	neurological	332	logistic	25111	131	24980	-0.094	0.088	0.91	0.283	-0.101	0.088	0.904	0.252	8387	18	8369	NA	NA	NA	NA	NA	NA	NA	NA
Intracranial hemorrhage	circulatory system	430	logistic	24864	233	24631	-0.071	0.066	0.931	0.283	-0.05	0.066	0.951	0.45	8778	130	8648	0.106618	0.0914366	1.11251	0.243603	-0.0581982	0.0919519	0.943463	0.526786
Hemorrhage from gastrointestinal ulcer	digestive	531.1	logistic	28272	32	28240	0.189	0.176	1.208	0.283	0.087	0.176	1.091	0.622	9837	30	9807	-0.0912504	0.189602	0.912789	0.630322	-0.0429414	0.191518	0.957967	0.822589
Peripheral or central vertigo	sense organs	386.2	logistic	24425	163	24262	0.085	0.079	1.089	0.284	-0.011	0.079	0.989	0.889	7717	91	7626	-0.177858	0.109176	0.837061	0.103294	0.0475958	0.112041	1.04875	0.670976
Disorders of diaphragm	respiratory	513.8	logistic	28360	62	28298	-0.136	0.128	0.873	0.286	0.224	0.127	1.251	0.0782	9694	32	9662	0.195459	0.179807	1.21587	0.277015	-0.023899	0.176444	0.976384	0.892258
Heartburn	digestive	530.9	logistic	18634	143	18491	0.09	0.084	1.094	0.286	0.102	0.084	1.107	0.224	5787	64	5723	-0.162373	0.131113	0.850124	0.215559	-0.0348158	0.132867	0.965783	0.793294
Elevated C-reactive protein (CRP)	symptoms	790.8	logistic	26098	51	26047	0.15	0.141	1.162	0.286	-0.032	0.141	0.968	0.818	8516	15	8501	NA	NA	NA	NA	NA	NA	NA	NA
Stress fracture	musculoskeletal	743.4	logistic	25885	91	25794	-0.113	0.106	0.894	0.287	0.059	0.106	1.06	0.579	9263	32	9231	-0.108483	0.185268	0.897194	0.55818	0.0708314	0.190044	1.0734	0.709364
Diabetic retinopathy	endocrine/metabolic	250.7	logistic	26687	299	26388	0.062	0.058	1.064	0.288	-0.072	0.058	0.931	0.218	8688	455	8233	0.046483	0.0509267	1.04758	0.361378	0.0429574	0.0512925	1.04389	0.402313
Inflammatory and toxic neuropathy	neurological	357	logistic	27534	452	27082	0.05	0.047	1.052	0.288	0.058	0.047	1.06	0.219	9513	202	9311	-0.117361	0.0730416	0.889264	0.108104	-0.0541728	0.0739227	0.947268	0.463662
Pectus and other congenital anomalies of ribs/sternum	congenital anomalies	756.2	logistic	28515	22	28493	-0.227	0.214	0.797	0.289	0.016	0.214	1.016	0.94	9989	NA	NA	NA	NA	NA	NA	NA	NA	NA	NA
Decreased white blood cell count	hematopoietic	288.1	logistic	24604	638	23966	0.042	0.04	1.043	0.291	-0.042	0.04	0.959	0.294	8165	201	7964	0.0151211	0.0737333	1.01524	0.837511	0.151439	0.0745248	1.16351	0.0421476
Sleep apnea	neurological	327.3	logistic	24674	3283	21391	0.02	0.019	1.02	0.291	0.005	0.019	1.005	0.788	8329	1931	6398	0.0310437	0.0269403	1.03153	0.249191	-0.00816026	0.0273337	0.991873	0.76529
Benign neoplasm of eye	neoplasms	224	logistic	28368	116	28252	0.098	0.093	1.104	0.292	0.015	0.093	1.016	0.869	10130	19	10111	NA	NA	NA	NA	NA	NA	NA	NA
Congenital anomaly of gallbladder, bile ducts, liver, pancreas	congenital anomalies	750.22	logistic	28255	36	28219	-0.177	0.168	0.838	0.292	-0.004	0.168	0.996	0.982	9923	9	9914	NA	NA	NA	NA	NA	NA	NA	NA
Melanomas of skin, dx or hx	neoplasms	172.1	logistic	24612	769	23843	-0.039	0.037	0.962	0.293	-0.067	0.037	0.935	0.0676	9710	13	9697	NA	NA	NA	NA	NA	NA	NA	NA
Convulsions	neurological	345.3	logistic	25430	450	24980	-0.05	0.048	0.951	0.293	-0.021	0.048	0.98	0.665	8656	287	8369	0.0355028	0.0617201	1.03614	0.56514	-0.0108771	0.0622952	0.989182	0.86139
Sleep disorders	neurological	327	logistic	25085	3694	21391	0.019	0.018	1.019	0.294	0.011	0.018	1.011	0.552	8742	2344	6398	0.0214868	0.025109	1.02172	0.392141	0.006326	0.0254902	1.00635	0.804
Retinal hemorrhage/ischemia	sense organs	362.8	logistic	26434	46	26388	-0.156	0.149	0.855	0.294	0.065	0.148	1.067	0.659	8252	19	8233	NA	NA	NA	NA	NA	NA	NA	NA
Hypertrophic obstructive cardiomyopathy	circulatory system	425.11	logistic	24686	154	24532	0.085	0.081	1.089	0.294	0.07	0.081	1.073	0.388	8667	35	8632	0.164359	0.1715	1.17864	0.337878	-0.120052	0.173511	0.886875	0.489004
Heart failure with preserved EF [Diastolic heart failure]	circulatory system	428.4	logistic	22150	1084	21066	0.035	0.033	1.035	0.295	-0.026	0.033	0.975	0.44	8107	590	7517	0.0542132	0.0462125	1.05571	0.240744	0.0585323	0.0463702	1.06028	0.206847
Glaucoma	sense organs	365	logistic	27448	743	26705	-0.039	0.038	0.961	0.296	-0.014	0.037	0.986	0.703	9382	848	8534	0.00166826	0.0386473	1.00167	0.965569	0.0117006	0.0390123	1.01177	0.764237
Temporomandibular joint disorders	digestive	526.4	logistic	27688	114	27574	0.099	0.095	1.104	0.296	-0.096	0.094	0.909	0.311	8856	44	8812	-0.0592051	0.15374	0.942513	0.700165	0.0216301	0.158539	1.02187	0.891478
Functional digestive disorders	digestive	564	logistic	21659	767	20892	-0.039	0.037	0.962	0.296	-0.002	0.037	0.998	0.964	6756	281	6475	-0.0265951	0.0617346	0.973755	0.666616	-0.00123644	0.0632129	0.998764	0.984394
Chronic passive congestion of liver	digestive	573.1	logistic	24414	36	24378	0.174	0.167	1.19	0.296	-0.102	0.167	0.903	0.54	8188	13	8175	NA	NA	NA	NA	NA	NA	NA	NA
Skin cancer	neoplasms	172	logistic	26383	2540	23843	-0.022	0.021	0.978	0.298	-0.026	0.021	0.974	0.212	9748	51	9697	-0.209458	0.141723	0.811024	0.139425	-0.0295345	0.146001	0.970897	0.839691
Abnormal findings examination of lungs	respiratory	514	logistic	27412	1698	25714	-0.026	0.025	0.974	0.298	-0.026	0.025	0.974	0.303	9519	676	8843	-0.0854374	0.0418451	0.918111	0.0411757	0.00952697	0.0422815	1.00957	0.821729
Blood in stool	digestive	578.2	logistic	26070	413	25657	-0.052	0.05	0.95	0.299	-0.03	0.05	0.971	0.552	8598	319	8279	-0.0102855	0.0584735	0.989767	0.860372	0.057947	0.0593544	1.05966	0.328922
Allergy/adverse effect of penicillin	injuries & poisonings	960.2	logistic	22926	298	22628	0.061	0.059	1.063	0.299	0.008	0.058	1.008	0.891	7747	186	7561	0.0203138	0.0761723	1.02052	0.789713	-0.0393927	0.0779099	0.961373	0.613124
Migrain with aura	neurological	340.1	logistic	25972	120	25852	0.095	0.092	1.1	0.3	-0.059	0.092	0.943	0.523	8173	65	8108	-0.164512	0.126579	0.848308	0.193712	-0.111856	0.129834	0.894173	0.388946
Other disorders of peritoneum	digestive	568	logistic	25929	94	25835	0.107	0.104	1.113	0.3	0.337	0.103	1.401	0.00111	8689	46	8643	0.0796368	0.15242	1.08289	0.601333	-0.0510449	0.155594	0.950236	0.742862
Fasciitis	musculoskeletal	728.7	logistic	23679	206	23473	-0.073	0.07	0.93	0.3	-0.049	0.07	0.952	0.483	6859	126	6733	-0.0513627	0.0927557	0.949934	0.579756	-0.00340531	0.0949896	0.9966	0.971402
Neutropenia	hematopoietic	288.11	logistic	24350	384	23966	0.053	0.051	1.055	0.301	0.007	0.052	1.007	0.887	8039	75	7964	-0.0590638	0.116901	0.942647	0.613385	0.0872561	0.118613	1.09118	0.461951
Primary open angle glaucoma	sense organs	365.11	logistic	26824	119	26705	0.096	0.093	1.1	0.302	0.035	0.092	1.036	0.704	8789	255	8534	0.0400737	0.0682968	1.04089	0.557366	0.0371966	0.0697632	1.0379	0.593907
Otosclerosis	sense organs	383	logistic	27026	21	27005	-0.227	0.22	0.797	0.302	0.085	0.22	1.089	0.699	9050	1	9049	NA	NA	NA	NA	NA	NA	NA	NA
Bone cancer	neoplasms	170.1	logistic	28845	118	28727	-0.095	0.092	0.909	0.304	-0.008	0.092	0.992	0.933	10214	18	10196	NA	NA	NA	NA	NA	NA	NA	NA
Alcoholism	mental disorders	317.1	logistic	20986	370	20616	0.054	0.052	1.055	0.304	-0.062	0.052	0.94	0.237	6360	307	6053	0.093616	0.0617923	1.09814	0.12977	-0.0115503	0.0617221	0.988516	0.851556
Other disorders of male genital organs	genitourinary	608	logistic	24134	353	23781	0.055	0.054	1.057	0.305	-0.108	0.054	0.898	0.0475	8597	180	8417	-0.0531406	0.082096	0.948247	0.517439	-0.0548893	0.0808772	0.94659	0.497345
Substance addiction and disorders	mental disorders	316	logistic	21086	470	20616	0.048	0.047	1.049	0.306	-0.04	0.047	0.961	0.392	6683	630	6053	0.0232049	0.0440679	1.02348	0.598492	0.0842532	0.0446624	1.0879	0.059235
Noninflammatory disorders of cervix	genitourinary	619.3	logistic	27631	34	27597	-0.176	0.172	0.838	0.306	-0.166	0.176	0.847	0.345	8522	45	8477	-0.122998	0.15231	0.884265	0.41935	-0.1009	0.156867	0.904024	0.520082
Malignant neoplasm, other	neoplasms	195.1	logistic	23869	442	23427	-0.049	0.048	0.952	0.308	-0.037	0.048	0.963	0.436	9029	103	8926	-0.142718	0.100385	0.866998	0.155112	0.109963	0.102623	1.11624	0.283934
Develomental delays and disorders	mental disorders	315	logistic	28205	33	28172	-0.179	0.176	0.836	0.308	-0.064	0.174	0.938	0.713	9969	41	9928	0.00575522	0.167956	1.00577	0.972665	-0.0898062	0.170687	0.914108	0.598786
Joint/ligament sprain	injuries & poisonings	840.3	logistic	26584	309	26275	0.059	0.057	1.06	0.308	0.084	0.057	1.088	0.141	8039	196	7843	0.0356581	0.07459	1.0363	0.632611	-0.0427905	0.0759386	0.958112	0.573103
Acquired hypothyroidism	endocrine/metabolic	244.2	logistic	22957	642	22315	-0.041	0.04	0.96	0.309	-0.019	0.04	0.981	0.629	8357	150	8207	-0.0415724	0.086441	0.95928	0.630564	0.136515	0.0865829	1.14627	0.114866
First degree AV block	circulatory system	426.21	logistic	15363	201	15162	0.073	0.071	1.075	0.309	-0.007	0.071	0.993	0.918	5364	73	5291	-0.127206	0.120677	0.880552	0.291836	0.0745997	0.122306	1.07745	0.541899
Vitamin deficiency	endocrine/metabolic	261	logistic	24828	2148	22680	-0.023	0.023	0.977	0.31	0.019	0.023	1.019	0.412	8368	1449	6919	-0.0508099	0.0304393	0.950459	0.0950735	-0.0337763	0.030861	0.966788	0.273752
Lesions of stomach and duodenum	digestive	537.1	logistic	26119	26	26093	-0.2	0.197	0.819	0.311	-0.066	0.196	0.936	0.736	8448	25	8423	-0.275635	0.202536	0.75909	0.173539	0.412287	0.20902	1.51027	0.0485558
Disturbances of sensation of smell and taste	neurological	350.6	logistic	26236	204	26032	0.071	0.07	1.074	0.312	-0.085	0.07	0.919	0.226	8676	46	8630	-0.284399	0.149831	0.752466	0.0576787	-0.216783	0.15095	0.805104	0.150967
Pulmonary heart disease	circulatory system	415	logistic	27086	1868	25218	0.024	0.024	1.025	0.312	-0.05	0.024	0.951	0.0397	9417	1001	8416	0.0227811	0.0348054	1.02304	0.512772	0.0502488	0.0352057	1.05153	0.153496
Flat foot	musculoskeletal	735.1	logistic	26845	37	26808	0.167	0.165	1.182	0.312	0.324	0.164	1.383	0.0481	9022	70	8952	-0.282296	0.123081	0.75405	0.0218142	-0.0072475	0.126535	0.992779	0.954325
Symptoms involving respiratory system and other chest symptoms	respiratory	519.9	logistic	27733	243	27490	0.065	0.065	1.067	0.313	-0.044	0.064	0.957	0.498	9449	113	9336	-0.02012	0.0989792	0.980081	0.83892	0.155379	0.100214	1.1681	0.12103
Temporomandibular joint disorder, unspecified	digestive	526.41	logistic	27615	41	27574	0.159	0.158	1.172	0.313	-0.133	0.157	0.875	0.395	8830	18	8812	NA	NA	NA	NA	NA	NA	NA	NA
Other non-epithelial cancer of skin	neoplasms	172.2	logistic	25743	1900	23843	-0.024	0.024	0.976	0.314	-0.01	0.024	0.99	0.668	9729	32	9697	-0.0875023	0.176136	0.916217	0.619338	-0.0224781	0.18009	0.977773	0.900669
Cellulitis and abscess of foot, toe	dermatologic	681.6	logistic	25689	27	25662	-0.195	0.193	0.823	0.314	-0.074	0.192	0.929	0.7	8074	42	8032	-0.0206301	0.16098	0.979581	0.898027	0.307559	0.162055	1.3601	0.0577135
Alcohol-related disorders	mental disorders	317	logistic	21091	475	20616	0.047	0.046	1.048	0.315	-0.063	0.046	0.939	0.174	6440	387	6053	0.0839614	0.0558142	1.08759	0.132504	-0.00326224	0.0554149	0.996743	0.953056
Chronic airway obstruction	respiratory	496	logistic	24836	1913	22923	-0.024	0.024	0.976	0.315	0.013	0.024	1.013	0.603	7919	877	7042	-0.0215223	0.0377978	0.978708	0.569081	-0.00965929	0.0381716	0.990387	0.80023
Congenital anomalies of genital organs	congenital anomalies	751.1	logistic	28255	36	28219	0.168	0.167	1.183	0.315	0.007	0.167	1.007	0.968	9928	14	9914	NA	NA	NA	NA	NA	NA	NA	NA
Kidney replaced by transpant	genitourinary	587	logistic	22055	618	21437	-0.041	0.041	0.96	0.316	0.021	0.041	1.021	0.614	6627	394	6233	0.0530365	0.0543092	1.05447	0.328784	0.0173333	0.0550795	1.01748	0.752992
Malignant neoplasm of retroperitoneum and peritoneum	neoplasms	159.4	logistic	26003	50	25953	-0.143	0.143	0.867	0.317	0.179	0.141	1.196	0.207	9438	9	9429	NA	NA	NA	NA	NA	NA	NA	NA
Suppurative and unspecified otitis media	sense organs	381.11	logistic	27184	179	27005	0.075	0.075	1.078	0.317	0.205	0.075	1.228	0.00619	9134	85	9049	-0.14433	0.111525	0.865602	0.195614	0.0248243	0.114063	1.02513	0.827712
Internal derangement of knee	injuries & poisonings	835	logistic	28189	184	28005	0.074	0.074	1.077	0.317	-0.104	0.074	0.902	0.163	9758	141	9617	-0.0344257	0.0867006	0.96616	0.69132	0.0161364	0.0882797	1.01627	0.854965
Neural tube defects	congenital anomalies	752.1	logistic	28837	33	28804	-0.175	0.175	0.84	0.318	-0.289	0.174	0.749	0.0972	10157	12	10145	NA	NA	NA	NA	NA	NA	NA	NA
Disorders of iron metabolism	hematopoietic	275.1	logistic	25325	99	25226	-0.101	0.101	0.904	0.319	0.055	0.101	1.057	0.581	8411	38	8373	0.18225	0.168008	1.19991	0.278025	-0.139544	0.167853	0.869755	0.40578
Other specified nonpsychotic and/or transient mental disorders	mental disorders	291	logistic	25560	155	25405	-0.08	0.081	0.923	0.319	-0.008	0.08	0.992	0.918	8469	99	8370	0.237561	0.105693	1.26815	0.0245983	0.200137	0.105876	1.22157	0.0587183
Eating disorder	mental disorders	305.2	logistic	19311	47	19264	0.145	0.146	1.156	0.319	0.217	0.148	1.243	0.142	5760	26	5734	0.228923	0.20582	1.25724	0.266032	0.0416492	0.211465	1.04253	0.843862
Cough	respiratory	512.8	logistic	19824	2171	17653	-0.023	0.023	0.977	0.319	-0.016	0.023	0.984	0.479	5955	1531	4424	0.0198895	0.0317469	1.02009	0.530986	0.0125403	0.0321183	1.01262	0.696211
Other signs and symptoms in breast	genitourinary	613.7	logistic	28146	62	28084	0.127	0.128	1.136	0.319	-0.042	0.129	0.959	0.747	9412	47	9365	-0.0279019	0.151235	0.972484	0.853626	-0.266038	0.153625	0.76641	0.083321
Cellulitis and abscess of arm/hand	dermatologic	681.3	logistic	25761	99	25662	0.101	0.101	1.106	0.319	0.042	0.101	1.043	0.679	8109	77	8032	-0.0315475	0.118102	0.968945	0.789376	-0.0590054	0.119383	0.942702	0.621127
Simple and unspecified goiter	endocrine/metabolic	240	logistic	22464	149	22315	0.082	0.083	1.086	0.32	0.033	0.082	1.034	0.688	8402	195	8207	-0.0211113	0.075642	0.97911	0.780172	0.0592275	0.0766249	1.06102	0.43955
Irritable Bowel Syndrome	digestive	564.1	logistic	21365	473	20892	-0.047	0.047	0.954	0.321	0.04	0.047	1.041	0.394	6586	111	6475	-0.0820134	0.0956108	0.92126	0.391012	-0.101075	0.0988872	0.903866	0.306724
Secondary hyperparathyroidism (of renal origin)	genitourinary	588.2	logistic	21655	218	21437	0.068	0.069	1.07	0.323	-0.129	0.068	0.879	0.059	6536	303	6233	-0.0309879	0.0627876	0.969487	0.621635	0.00370044	0.0640819	1.00371	0.953951
Epistaxis or throat hemorrhage	respiratory	477	logistic	22002	219	21783	0.068	0.068	1.07	0.324	-0.033	0.068	0.967	0.624	6300	139	6161	0.0115747	0.0883334	1.01164	0.895748	0.0077551	0.0903866	1.00779	0.931626
Oral aphthae	digestive	528.12	logistic	27050	32	27018	-0.176	0.178	0.839	0.324	-0.221	0.177	0.802	0.213	9424	2	9422	NA	NA	NA	NA	NA	NA	NA	NA
Other demyelinating diseases of central nervous system	neurological	341	logistic	25008	28	24980	-0.187	0.19	0.83	0.326	-0.31	0.19	0.733	0.103	8382	13	8369	NA	NA	NA	NA	NA	NA	NA	NA
Incisional hernia	digestive	550.6	logistic	25815	534	25281	-0.043	0.044	0.958	0.328	-0.001	0.044	0.999	0.989	8916	157	8759	0.086287	0.0824304	1.09012	0.295198	0.108183	0.0840045	1.11425	0.197807
Retinal detachments and defects	sense organs	361	logistic	26809	104	26705	-0.096	0.099	0.908	0.329	-0.156	0.098	0.856	0.111	8599	65	8534	0.052971	0.129224	1.0544	0.681867	-0.146941	0.129803	0.863345	0.257624
Cardiac dysrhythmias	circulatory system	427	logistic	24267	9105	15162	0.014	0.014	1.014	0.329	-0.015	0.014	0.985	0.285	8047	2756	5291	0.0508755	0.0248696	1.05219	0.0407864	0.0368854	0.0250142	1.03757	0.140326
Alopecia	dermatologic	704.1	logistic	27392	276	27116	-0.059	0.061	0.942	0.329	-0.088	0.061	0.916	0.15	9190	177	9013	-0.150506	0.078709	0.860272	0.055852	-0.0199859	0.0802986	0.980213	0.803443
Pectus excavatum	congenital anomalies	756.21	logistic	28513	20	28493	-0.219	0.224	0.803	0.329	0.065	0.225	1.067	0.774	9989	NA	NA	NA	NA	NA	NA	NA	NA	NA	NA
Schizophrenia and other psychotic disorders	mental disorders	295	logistic	19355	91	19264	-0.102	0.105	0.903	0.33	0.055	0.106	1.057	0.6	5913	179	5734	0.0715103	0.0804062	1.07413	0.373808	0.0636575	0.0815303	1.06573	0.43493
Ulceration of the lower GI tract	digestive	556	logistic	20951	59	20892	-0.127	0.131	0.88	0.33	-0.08	0.13	0.923	0.539	6522	47	6475	0.00525498	0.152585	1.00527	0.972527	0.316272	0.157227	1.372	0.044266
Iatrogenic endocrine disorders	endocrine/metabolic	258	logistic	25904	59	25845	0.126	0.13	1.134	0.332	0.061	0.131	1.063	0.642	8602	7	8595	NA	NA	NA	NA	NA	NA	NA	NA
Cyst of kidney, acquired	genitourinary	586.2	logistic	21609	172	21437	-0.075	0.077	0.928	0.332	0.03	0.077	1.03	0.698	6333	100	6233	-0.0301606	0.101563	0.97029	0.766493	-0.00797621	0.103913	0.992056	0.938816
Sepsis	injuries & poisonings	994.2	logistic	28137	1113	27024	0.03	0.031	1.03	0.334	0.003	0.031	1.003	0.917	9787	593	9194	0.038252	0.0440021	1.03899	0.384671	-0.0836679	0.0445448	0.919737	0.0603418
Agorophobia, social phobia, and panic disorder	mental disorders	300.12	logistic	19424	160	19264	0.077	0.08	1.08	0.335	-0.028	0.08	0.972	0.724	5827	93	5734	-0.161085	0.104443	0.85122	0.122995	-0.175174	0.109646	0.839311	0.110124
Cystic fibrosis	respiratory	499	logistic	29115	68	29047	0.117	0.121	1.124	0.335	-0.026	0.122	0.975	0.833	10280	NA	NA	NA	NA	NA	NA	NA	NA	NA	NA
Glossitis	digestive	529.1	logistic	27054	36	27018	-0.161	0.168	0.851	0.336	-0.129	0.167	0.879	0.438	9426	4	9422	NA	NA	NA	NA	NA	NA	NA	NA
Glucocorticoid deficiency	endocrine/metabolic	255.21	logistic	25995	150	25845	0.079	0.082	1.082	0.337	0.046	0.082	1.047	0.576	8647	52	8595	0.152644	0.145116	1.16491	0.292858	0.113572	0.146325	1.12027	0.437655
Polyneuropathy due to drugs	mental disorders	316.1	logistic	20687	71	20616	-0.115	0.12	0.891	0.337	-0.142	0.119	0.868	0.231	6074	21	6053	-0.199547	0.225536	0.819102	0.376281	0.0614447	0.228213	1.06337	0.787743
Poisoning by analgesics, antipyretics, and antirheumatics	injuries & poisonings	965	logistic	22774	146	22628	0.08	0.083	1.083	0.34	-0.042	0.083	0.959	0.612	7678	117	7561	0.0646388	0.0969536	1.06677	0.504965	0.15133	0.0983478	1.16338	0.123872
Other disorders of liver	digestive	573	logistic	25647	1269	24378	0.027	0.029	1.028	0.341	-0.011	0.029	0.989	0.692	8721	546	8175	0.00355462	0.0458092	1.00356	0.938149	0.0171394	0.0462991	1.01729	0.711242
Other and unspecified disorders of the nervous system	neurological	349	logistic	25045	65	24980	-0.118	0.124	0.889	0.342	0.055	0.124	1.057	0.656	8392	23	8369	-0.27645	0.208471	0.758471	0.184811	-0.107691	0.214169	0.897905	0.615082
Irregular menstrual cycle/bleeding	genitourinary	626.1	logistic	26213	826	25387	0.036	0.038	1.036	0.349	-0.017	0.038	0.983	0.659	8348	928	7420	-0.0309224	0.0395913	0.969551	0.434779	-0.0771655	0.0409582	0.925737	0.0595643
Traumatic arthropathy	injuries & poisonings	836	logistic	28043	38	28005	-0.154	0.164	0.858	0.349	0.008	0.163	1.008	0.959	9646	29	9617	0.347499	0.194756	1.41552	0.0743788	0.193852	0.196061	1.21392	0.322792
Abnormal involuntary movements	neurological	350.1	logistic	26439	407	26032	0.047	0.05	1.048	0.351	-0.026	0.05	0.975	0.607	8807	177	8630	-0.0638727	0.0781075	0.938124	0.413498	-0.0108965	0.0781656	0.989163	0.889132
Other disorders of eyelids	sense organs	374	logistic	26856	406	26450	0.047	0.05	1.048	0.351	0.063	0.05	1.065	0.212	8640	134	8506	-0.088821	0.0896733	0.915009	0.321932	-0.115611	0.0914304	0.890822	0.206063
Noninfectious disorders of lymphatic channels	circulatory system	450	logistic	28797	229	28568	-0.062	0.067	0.94	0.351	-0.022	0.067	0.978	0.736	10138	108	10030	-0.0509792	0.100403	0.950298	0.611633	-0.0949531	0.101507	0.909416	0.349565
Other disorders of gallbladder	digestive	575.7	logistic	27484	51	27433	-0.131	0.141	0.877	0.351	0.148	0.141	1.16	0.292	9508	14	9494	NA	NA	NA	NA	NA	NA	NA	NA
Osteoarthrosis NOS	musculoskeletal	740.9	logistic	24798	1074	23724	0.03	0.032	1.03	0.352	-0.034	0.032	0.966	0.276	7881	921	6960	-0.0513345	0.0387678	0.949961	0.185452	-0.00947668	0.0396174	0.990568	0.810946
Personality disorders	mental disorders	301	logistic	19303	39	19264	-0.15	0.162	0.86	0.353	-0.042	0.162	0.958	0.793	5758	24	5734	0.118481	0.214514	1.12579	0.580728	-0.0245408	0.218282	0.975758	0.910485
Gingivitis	digestive	523.1	logistic	27595	21	27574	0.202	0.219	1.224	0.356	-0.082	0.218	0.921	0.707	8819	7	8812	NA	NA	NA	NA	NA	NA	NA	NA
Bone marrow or stem cell transplant	neoplasms	860	logistic	29036	165	28871	0.072	0.078	1.075	0.356	0.035	0.078	1.036	0.651	10271	18	10253	NA	NA	NA	NA	NA	NA	NA	NA
Osteoarthrosis, generalized	musculoskeletal	740.2	logistic	24053	329	23724	-0.052	0.057	0.949	0.358	0.079	0.056	1.082	0.162	7219	259	6960	-0.0639276	0.0680045	0.938073	0.347192	-0.0391005	0.0684751	0.961654	0.567988
Difficulty in walking	musculoskeletal	741.3	logistic	26851	35	26816	-0.157	0.171	0.855	0.359	0.234	0.17	1.264	0.169	8448	49	8399	-0.18121	0.147388	0.83426	0.218892	0.00450708	0.14925	1.00452	0.975909
Polyarteritis nodosa and allied conditions	circulatory system	446	logistic	23078	181	22897	0.069	0.075	1.071	0.36	0.033	0.075	1.034	0.659	8471	60	8411	-0.118792	0.133884	0.887993	0.374929	-0.149252	0.134884	0.861352	0.268502
Seborrheic keratosis	dermatologic	702.2	logistic	26781	1204	25577	-0.027	0.03	0.973	0.36	-0.001	0.03	0.999	0.986	9954	85	9869	0.0265236	0.109371	1.02688	0.808384	-0.118474	0.110713	0.888275	0.284575
Congenital musculoskeletal deformities of spine	congenital anomalies	754	logistic	28518	25	28493	-0.184	0.201	0.832	0.36	-0.291	0.2	0.747	0.144	9999	10	9989	NA	NA	NA	NA	NA	NA	NA	NA
Non-Hodgkins lymphoma	neoplasms	202.2	logistic	27882	597	27285	-0.038	0.042	0.963	0.362	-0.006	0.041	0.994	0.888	9951	102	9849	0.0748161	0.101325	1.07769	0.460284	0.20096	0.101691	1.22258	0.0481336
Hemangioma and lymphangioma, any site	neoplasms	228	logistic	28531	173	28358	-0.07	0.077	0.932	0.362	0.043	0.076	1.044	0.577	10218	30	10188	0.114824	0.188082	1.12168	0.541531	-0.0436045	0.190661	0.957333	0.819101
Other chronic ischemic heart disease, unspecified	circulatory system	411.8	logistic	21274	1027	20247	0.03	0.033	1.031	0.362	-0.014	0.033	0.986	0.681	8019	307	7712	0.0829434	0.0609017	1.08648	0.173222	-0.03468	0.0606043	0.965914	0.567161
Acute appendicitis	digestive	540.11	logistic	29019	66	28953	0.113	0.123	1.119	0.362	-0.243	0.123	0.784	0.0489	10243	33	10210	0.241081	0.183384	1.27262	0.188635	-0.208065	0.18475	0.812154	0.260081
Loss of teeth or edentulism	digestive	525.1	logistic	27622	48	27574	0.132	0.145	1.141	0.363	0.091	0.145	1.095	0.531	8827	15	8812	NA	NA	NA	NA	NA	NA	NA	NA
Diverticulitis	digestive	562.2	logistic	21289	397	20892	0.046	0.051	1.047	0.364	-0.081	0.051	0.923	0.111	6609	134	6475	0.0260189	0.0893264	1.02636	0.770838	0.0558334	0.0909015	1.05742	0.539071
Degenerative skin conditions and other dermatoses	dermatologic	702	logistic	26373	2076	24297	-0.021	0.023	0.979	0.364	0.019	0.023	1.019	0.42	9002	93	8909	-0.00710317	0.104555	0.992922	0.945836	-0.107743	0.10565	0.897858	0.307818
Nonallopathic lesions NEC	symptoms	769	logistic	29087	45	29042	-0.136	0.15	0.873	0.364	-0.117	0.15	0.89	0.436	10262	19	10243	NA	NA	NA	NA	NA	NA	NA	NA
Graves' disease	endocrine/metabolic	242.1	logistic	22456	141	22315	-0.077	0.085	0.926	0.365	-0.021	0.085	0.979	0.801	8334	127	8207	-0.0474345	0.0927001	0.953673	0.608862	0.063625	0.0933301	1.06569	0.495416
Retinal detachment with retinal defect	sense organs	361.1	logistic	26739	34	26705	0.156	0.172	1.169	0.365	-0.271	0.171	0.762	0.112	8545	11	8534	NA	NA	NA	NA	NA	NA	NA	NA
Cancer of prostate	neoplasms	185	logistic	25503	1546	23957	0.026	0.028	1.026	0.366	-0.013	0.028	0.987	0.656	9339	500	8839	-0.000537492	0.0592213	0.999463	0.992759	-0.128791	0.0581204	0.879157	0.0266955
Benign neoplasm of unspecified sites	neoplasms	229	logistic	29003	39	28964	0.145	0.161	1.156	0.366	0.063	0.16	1.065	0.693	10212	24	10188	-0.0687433	0.214543	0.933566	0.748653	-0.131608	0.219218	0.876684	0.54827
Abnormal electrocardiogram [ECG] [EKG]	circulatory system	426.7	logistic	15699	537	15162	0.04	0.044	1.041	0.367	0.008	0.044	1.008	0.856	5708	417	5291	-0.000411787	0.0530952	0.999588	0.993812	0.0607562	0.0540379	1.06264	0.260875
Scleritis and episcleritis	sense organs	379.1	logistic	26453	21	26432	-0.198	0.221	0.82	0.369	-0.129	0.218	0.879	0.556	8349	26	8323	-0.168532	0.19836	0.844904	0.395532	0.0365078	0.205026	1.03718	0.858673
Nontoxic uninodular goiter	endocrine/metabolic	241.1	logistic	23147	832	22315	-0.032	0.036	0.968	0.37	-0.011	0.036	0.989	0.765	8598	391	8207	-0.00141875	0.0539964	0.998582	0.979038	0.00541283	0.0546617	1.00543	0.921119
Visual field defects	sense organs	368.4	logistic	27159	161	26998	-0.071	0.079	0.932	0.372	0.092	0.079	1.097	0.242	8730	72	8658	0.152392	0.120614	1.16462	0.206422	-0.143487	0.121938	0.866332	0.239307
Somatoform disorder	mental disorders	303.4	logistic	19286	22	19264	0.19	0.214	1.209	0.374	-0.107	0.214	0.899	0.618	5758	24	5734	-0.373258	0.202199	0.688487	0.0648928	-0.00628602	0.215336	0.993734	0.976712
Chronic ulcer of skin	dermatologic	707	logistic	28688	536	28152	-0.039	0.044	0.962	0.374	-0.098	0.044	0.907	0.0255	10021	325	9696	0.0914199	0.058983	1.09573	0.121157	0.0926102	0.0595487	1.09703	0.119898
Cardiomegaly	circulatory system	416	logistic	25404	186	25218	0.065	0.074	1.067	0.376	-0.107	0.073	0.899	0.146	8576	160	8416	-0.0206386	0.0834498	0.979573	0.804662	0.072653	0.0844426	1.07536	0.389578
Complications of labor and delivery NEC	pregnancy complications	669	logistic	28982	27	28955	-0.172	0.195	0.842	0.377	-0.236	0.201	0.79	0.24	10115	28	10087	0.195204	0.196998	1.21556	0.321737	0.0177499	0.19998	1.01791	0.929274
Effects radiation NOS	injuries & poisonings	990	logistic	26244	605	25639	-0.036	0.041	0.964	0.378	0.006	0.041	1.006	0.89	9055	174	8881	-0.0416622	0.0795173	0.959194	0.600321	-0.0590361	0.0801077	0.942673	0.461148
Fluid overload	endocrine/metabolic	276.6	logistic	21655	292	21363	-0.052	0.059	0.949	0.379	-0.059	0.059	0.943	0.321	6817	276	6541	0.0939009	0.0648899	1.09845	0.147875	-0.0500754	0.065095	0.951158	0.441736
Infertility, female, associated with anovulation	genitourinary	626.15	logistic	25418	31	25387	0.162	0.184	1.175	0.379	-0.141	0.18	0.869	0.434	7434	14	7420	NA	NA	NA	NA	NA	NA	NA	NA
Arthropathy associated with other disorders classified elsewhere	musculoskeletal	713	logistic	26301	42	26259	-0.136	0.155	0.873	0.379	-0.122	0.154	0.886	0.429	8535	14	8521	NA	NA	NA	NA	NA	NA	NA	NA
Screening for malignant neoplasms of the skin	neoplasms	216.1	logistic	24483	5727	18756	-0.014	0.015	0.987	0.38	0.008	0.015	1.008	0.618	8646	4023	4623	-0.0305492	0.0230586	0.969913	0.185221	-0.0247319	0.0232712	0.975571	0.287886
Arterial dissection	circulatory system	442.4	logistic	22958	61	22897	0.113	0.129	1.12	0.38	-0.021	0.128	0.979	0.868	8424	13	8411	NA	NA	NA	NA	NA	NA	NA	NA
Pain and other symptoms associated with female genital organs	genitourinary	625	logistic	27793	319	27474	0.05	0.057	1.051	0.38	-0.092	0.057	0.912	0.107	9013	354	8659	0.0215895	0.0571034	1.02182	0.705372	-0.0844934	0.0583336	0.918978	0.147491
Malignant neoplasm of liver, primary	neoplasms	155.1	logistic	26123	170	25953	0.067	0.077	1.069	0.382	0.102	0.077	1.107	0.184	9503	74	9429	-0.0103701	0.121267	0.989683	0.931852	0.0994699	0.121904	1.10459	0.41452
Benign neoplasm of colon	neoplasms	208	logistic	27027	2117	24910	-0.02	0.023	0.98	0.382	0.001	0.023	1.001	0.972	9365	1254	8111	0.0310445	0.0330498	1.03153	0.347564	-0.0385156	0.0332347	0.962217	0.246497
Infection of the eye	sense organs	369	logistic	26659	209	26450	0.061	0.07	1.063	0.383	0.079	0.07	1.082	0.256	8672	166	8506	-0.0118685	0.0813592	0.988202	0.884018	0.125111	0.0825298	1.13327	0.129533
Essential hypertension	circulatory system	401.1	logistic	24038	10599	13439	0.013	0.015	1.013	0.383	-0.022	0.015	0.978	0.137	9032	5545	3487	0.0297405	0.026949	1.03019	0.269774	0.0458141	0.0272022	1.04688	0.0921424
Facial weakness	symptoms	772.6	logistic	27072	38	27034	-0.143	0.164	0.867	0.383	0.005	0.163	1.005	0.976	8835	50	8785	0.196723	0.14368	1.21741	0.170946	-0.0907961	0.144033	0.913204	0.528444
Gastric ulcer	digestive	531.2	logistic	28324	84	28240	0.095	0.11	1.1	0.384	0.066	0.109	1.069	0.544	9864	57	9807	-0.0659739	0.134246	0.936155	0.623116	0.199455	0.137696	1.22074	0.147474
Degeneration of macula and posterior pole of retina	sense organs	362.2	logistic	26789	401	26388	-0.044	0.051	0.957	0.387	0.04	0.051	1.041	0.43	8399	166	8233	-0.04299	0.08254	0.957921	0.60248	0.0484528	0.0837657	1.04965	0.562972
Ulceration of intestine	digestive	556.1	logistic	20931	39	20892	-0.139	0.161	0.87	0.387	-0.067	0.16	0.935	0.676	6505	30	6475	-0.00231294	0.187521	0.99769	0.990159	0.439996	0.194637	1.5527	0.0237839
Cystic kidney disease	congenital anomalies	751.21	logistic	28436	217	28219	-0.059	0.068	0.942	0.387	-0.007	0.068	0.993	0.923	9994	80	9914	0.226996	0.115565	1.25483	0.0495036	-0.0519181	0.11742	0.949407	0.658375
Diseases of the jaws	digestive	526	logistic	27808	234	27574	0.057	0.066	1.059	0.388	-0.02	0.066	0.98	0.764	8931	119	8812	-0.0750808	0.094519	0.927669	0.426994	-0.108724	0.0966532	0.896978	0.260635
Peripheral enthesopathies and allied syndromes	musculoskeletal	726	logistic	25138	1665	23473	0.022	0.025	1.022	0.388	-0.011	0.025	0.989	0.669	7870	1137	6733	0.0117845	0.0339776	1.01185	0.728718	-0.00851968	0.0343447	0.991517	0.804085
Abdominal hernia	digestive	550	logistic	27439	2158	25281	-0.019	0.023	0.981	0.389	0.014	0.022	1.014	0.537	9556	797	8759	0.0479632	0.0380443	1.04913	0.20741	0.0684514	0.0386708	1.07085	0.0767091
Vertiginous syndromes and other disorders of vestibular system	sense organs	386	logistic	25219	957	24262	-0.029	0.033	0.972	0.39	0.057	0.033	1.059	0.0839	8140	514	7626	0.00955254	0.0479986	1.0096	0.842249	0.0164934	0.048548	1.01663	0.734057
Precordial pain	circulatory system	418.1	logistic	23004	180	22824	-0.064	0.075	0.938	0.39	-0.032	0.075	0.969	0.67	5994	172	5822	0.110837	0.0798745	1.11721	0.165245	-0.0647082	0.0810463	0.937341	0.424632
Nevus, non-neoplastic	neoplasms	217.1	logistic	19011	255	18756	0.054	0.063	1.056	0.391	0.073	0.063	1.076	0.243	4627	4	4623	NA	NA	NA	NA	NA	NA	NA	NA
Disturbance of skin sensation	dermatologic	687.4	logistic	24629	1127	23502	0.026	0.031	1.027	0.391	-0.014	0.03	0.986	0.646	7473	968	6505	-0.0336187	0.0360512	0.96694	0.351065	-0.0517026	0.0366375	0.949611	0.158188
Malignant neoplasm of uterus	neoplasms	182	logistic	24580	195	24385	-0.063	0.074	0.939	0.392	-0.105	0.073	0.901	0.153	7789	81	7708	0.178998	0.118498	1.19602	0.1309	0.0325885	0.121217	1.03313	0.78805
Endometriosis	genitourinary	615	logistic	28217	137	28080	-0.074	0.087	0.928	0.392	-0.052	0.087	0.949	0.548	8646	130	8516	0.116855	0.0927215	1.12396	0.207569	-0.161958	0.0939644	0.850477	0.0847785
Other specified disorders of plasma protein metabolism	endocrine/metabolic	270.38	logistic	27562	51	27511	-0.12	0.14	0.887	0.393	0.152	0.14	1.164	0.279	9072	19	9053	NA	NA	NA	NA	NA	NA	NA	NA
Pericarditis	circulatory system	420.2	logistic	24920	388	24532	0.044	0.051	1.045	0.394	-0.004	0.051	0.996	0.941	8790	158	8632	-0.0112721	0.0844989	0.988791	0.893877	0.0506604	0.0860431	1.05197	0.55601
Cardiac arrest	circulatory system	427.42	logistic	15328	166	15162	-0.066	0.078	0.936	0.394	0.113	0.078	1.119	0.146	5387	96	5291	-0.0424303	0.106694	0.958457	0.690865	0.0218144	0.108439	1.02205	0.840568
Other conditions or status of the mother complicating pregnancy, childbirth, or the puerperium	pregnancy complications	649	logistic	28783	715	28068	0.035	0.041	1.036	0.394	-0.119	0.041	0.888	0.00413	9953	876	9077	-0.0333409	0.0458113	0.967209	0.466744	-0.0256506	0.0464076	0.974676	0.580452
Congenital anomalies of urinary system	congenital anomalies	751.2	logistic	28489	270	28219	-0.052	0.061	0.949	0.396	-0.013	0.061	0.987	0.828	10009	95	9914	0.210105	0.106964	1.23381	0.0495	-0.0300893	0.108395	0.970359	0.781328
Atherosclerosis of renal artery	circulatory system	440.1	logistic	22988	91	22897	-0.089	0.106	0.914	0.398	-0.029	0.105	0.971	0.783	8431	20	8411	-0.154586	0.223751	0.85677	0.489639	-0.179731	0.225091	0.835495	0.424591
Cystitis and urethritis	genitourinary	592	logistic	23576	289	23287	-0.05	0.06	0.951	0.4	0.036	0.06	1.037	0.545	7031	139	6892	0.131447	0.0869624	1.14048	0.130651	0.0576492	0.0879384	1.05934	0.512105
Impacted cerumen	sense organs	380.4	logistic	27803	326	27477	-0.047	0.056	0.954	0.401	0.028	0.056	1.028	0.621	9511	213	9298	0.156299	0.0722108	1.16918	0.0304279	0.0943196	0.0726789	1.09891	0.194371
Hyposmolality and/or hyponatremia	endocrine/metabolic	276.12	logistic	21989	626	21363	0.034	0.041	1.035	0.402	0.014	0.041	1.014	0.733	6821	280	6541	-0.0252209	0.0638454	0.975095	0.692821	-0.0239151	0.063365	0.976369	0.705863
Infertility, female	genitourinary	626.8	logistic	25762	375	25387	-0.046	0.055	0.955	0.402	-0.004	0.055	0.996	0.941	7577	157	7420	-0.0302313	0.0851087	0.970221	0.722434	-0.0491421	0.0878088	0.952046	0.575719
Sexually transmitted infections (not HIV or hepatitis)	infectious diseases	90	logistic	29017	51	28966	0.117	0.14	1.124	0.405	-0.119	0.14	0.888	0.395	10017	115	9902	-0.0927125	0.0992559	0.911456	0.350265	-0.0976973	0.100659	0.906923	0.331759
Cancer of bone and connective tissue	neoplasms	170	logistic	29031	304	28727	0.048	0.058	1.049	0.405	-0.083	0.058	0.92	0.15	10253	57	10196	-0.00748926	0.133349	0.992539	0.955212	-0.0424932	0.134284	0.958397	0.751668
Iron deficiency anemia secondary to blood loss (chronic)	hematopoietic	280.2	logistic	20317	236	20081	0.055	0.066	1.057	0.405	0.026	0.066	1.026	0.697	5385	184	5201	-0.205671	0.0802331	0.814101	0.0103648	0.0194537	0.0817726	1.01964	0.811958
Inflammatory diseases of female pelvic organs	genitourinary	614	logistic	28283	203	28080	0.059	0.071	1.061	0.405	-0.018	0.072	0.982	0.802	9162	646	8516	-0.0200806	0.045414	0.98012	0.658368	-0.039482	0.046572	0.961287	0.396571
Contracture of joint	musculoskeletal	739	logistic	26852	44	26808	0.126	0.151	1.134	0.406	0.054	0.151	1.056	0.72	8993	41	8952	-0.27978	0.163991	0.75595	0.0879953	0.0980203	0.167514	1.10299	0.55845
Disorders of phosphorus metabolism	endocrine/metabolic	275.53	logistic	25383	157	25226	-0.067	0.08	0.936	0.407	0.005	0.08	1.005	0.953	8563	190	8373	-0.0145158	0.0765927	0.985589	0.849686	0.022073	0.0775724	1.02232	0.775991
Lower gastrointestinal congenital anomalies	congenital anomalies	750.2	logistic	28276	57	28219	-0.11	0.133	0.896	0.408	-0.008	0.133	0.992	0.955	9929	15	9914	NA	NA	NA	NA	NA	NA	NA	NA
Paralytic strabismus	sense organs	378.5	logistic	26500	68	26432	-0.101	0.122	0.904	0.409	0.075	0.121	1.078	0.535	8340	17	8323	NA	NA	NA	NA	NA	NA	NA	NA
Chronic pericarditis	circulatory system	420.22	logistic	24572	40	24532	0.131	0.158	1.14	0.409	-0.315	0.159	0.73	0.0472	8642	10	8632	NA	NA	NA	NA	NA	NA	NA	NA
Nephritis and nephropathy without mention of glomerulonephritis	genitourinary	580.3	logistic	21620	183	21437	-0.061	0.074	0.94	0.409	0.105	0.074	1.111	0.159	6378	145	6233	0.107436	0.0862669	1.11342	0.212988	0.109207	0.0871398	1.11539	0.210118
Other acquired deformities of limbs	musculoskeletal	736	logistic	26895	87	26808	-0.089	0.108	0.915	0.409	-0.126	0.108	0.882	0.243	9019	67	8952	-0.249263	0.127866	0.779375	0.0512476	0.0751208	0.130672	1.07801	0.565373
Septic shock	injuries & poisonings	994.21	logistic	27081	57	27024	0.11	0.133	1.116	0.409	-0.065	0.132	0.937	0.621	9228	34	9194	-0.0404672	0.173303	0.960341	0.815369	-0.0397526	0.176238	0.961027	0.821542
Schizophrenia	mental disorders	295.1	logistic	19300	36	19264	-0.137	0.167	0.872	0.411	-0.032	0.168	0.969	0.85	5866	132	5734	0.079588	0.0940834	1.08284	0.397592	0.0220826	0.0952953	1.02233	0.81675
Chronic osteomyelitis	musculoskeletal	710.12	logistic	26349	90	26259	-0.087	0.106	0.917	0.413	0.058	0.106	1.06	0.581	8578	57	8521	0.194234	0.141461	1.21438	0.169733	0.182523	0.142708	1.20024	0.200897
Chronic prostatitis	genitourinary	601.12	logistic	24005	48	23957	-0.118	0.145	0.889	0.415	0.029	0.147	1.03	0.841	8854	15	8839	NA	NA	NA	NA	NA	NA	NA	NA
Other specified disorders involving the immune mechanism	endocrine/metabolic	279.8	logistic	26919	30	26889	-0.149	0.184	0.861	0.416	-0.243	0.184	0.784	0.187	9270	14	9256	NA	NA	NA	NA	NA	NA	NA	NA
Herpes simplex	infectious diseases	54	logistic	25008	289	24719	0.048	0.059	1.049	0.417	-0.028	0.059	0.973	0.639	7549	293	7256	0.0558084	0.0619715	1.0574	0.367828	-0.0113967	0.0638741	0.988668	0.85839
Hypersomnia	neurological	327.1	logistic	21575	184	21391	-0.06	0.074	0.942	0.419	0.124	0.074	1.132	0.0942	6529	131	6398	-0.0931843	0.0907163	0.911026	0.304323	-0.0859059	0.0934409	0.917681	0.357906
Personal history of allergy to medicinal agents	injuries & poisonings	977	logistic	22839	211	22628	0.056	0.069	1.058	0.419	-0.053	0.069	0.948	0.439	7678	117	7561	0.0543902	0.0984692	1.0559	0.580703	0.075963	0.100152	1.07892	0.448165
Lymphoid leukemia, acute	neoplasms	204.11	logistic	27325	40	27285	-0.128	0.159	0.88	0.42	-0.242	0.158	0.785	0.126	9855	6	9849	NA	NA	NA	NA	NA	NA	NA	NA
Disorders of conjunctiva	sense organs	372	logistic	26525	75	26450	-0.094	0.116	0.911	0.421	0.143	0.116	1.153	0.218	8570	64	8506	0.239733	0.130605	1.27091	0.0664238	0.0813938	0.133664	1.0848	0.542563
Pneumonia	respiratory	480	logistic	26335	1419	24916	-0.022	0.027	0.978	0.421	-0.034	0.027	0.966	0.209	8712	782	7930	0.0393821	0.0390855	1.04017	0.313652	0.0477819	0.0396698	1.04894	0.2284
Nerve plexus lesions	neurological	353.1	logistic	26290	71	26219	-0.095	0.119	0.909	0.422	-0.195	0.119	0.823	0.1	8354	15	8339	NA	NA	NA	NA	NA	NA	NA	NA
Abnormal results of function study of pulmonary system	respiratory	514.1	logistic	25784	70	25714	0.097	0.121	1.102	0.422	-0.029	0.12	0.971	0.806	8913	70	8843	0.0171794	0.124406	1.01733	0.890168	0.0443415	0.126112	1.04534	0.725135
Alpha-1-antitrypsin deficiency	endocrine/metabolic	270.34	logistic	27546	35	27511	-0.135	0.168	0.874	0.423	0.034	0.169	1.035	0.841	9053	NA	NA	NA	NA	NA	NA	NA	NA	NA	NA
Bursitis	musculoskeletal	726.3	logistic	23622	149	23473	0.066	0.082	1.068	0.423	-0.07	0.082	0.932	0.394	6823	90	6733	-0.0125936	0.108109	0.987485	0.907264	0.00973796	0.110407	1.00979	0.929717
Paraproteinemia	endocrine/metabolic	270.32	logistic	27651	140	27511	0.068	0.085	1.07	0.424	-0.034	0.085	0.967	0.689	9160	107	9053	-0.0582921	0.102043	0.943374	0.567831	0.190014	0.103496	1.20927	0.0663636
Malunion and nonunion of fracture	musculoskeletal	733.8	logistic	24947	93	24854	0.083	0.104	1.087	0.424	-0.113	0.104	0.893	0.277	8173	20	8153	-0.209936	0.236027	0.810636	0.373757	-0.0246698	0.237628	0.975632	0.917314
Cancer of stomach	neoplasms	151	logistic	26011	58	25953	0.105	0.132	1.111	0.427	-0.059	0.131	0.942	0.651	9450	21	9429	0.196143	0.239248	1.2167	0.412312	-0.1974	0.243881	0.820863	0.41828
Symptomatic menopause	genitourinary	627.2	logistic	25790	403	25387	-0.041	0.052	0.96	0.428	0.132	0.052	1.142	0.0104	7595	175	7420	-0.00985872	0.0792579	0.99019	0.901008	-0.140026	0.0818042	0.869336	0.0869479
Missed abortion/Hydatidiform mole	pregnancy complications	634.1	logistic	28458	67	28391	-0.099	0.125	0.905	0.428	-0.19	0.124	0.827	0.124	9402	46	9356	-0.246057	0.15012	0.781878	0.101198	0.0482015	0.155393	1.04938	0.756416
Acute osteomyelitis	musculoskeletal	710.11	logistic	26341	82	26259	-0.088	0.111	0.916	0.429	0.213	0.111	1.238	0.0546	8573	52	8521	0.13717	0.150254	1.14702	0.361284	0.210875	0.151965	1.23476	0.165241
Phobia	mental disorders	300.13	logistic	19296	32	19264	-0.14	0.178	0.869	0.431	0.099	0.178	1.105	0.577	5749	15	5734	NA	NA	NA	NA	NA	NA	NA	NA
Aneurysm of other specified artery	circulatory system	442.8	logistic	22973	76	22897	-0.091	0.115	0.913	0.431	0.045	0.115	1.046	0.695	8433	22	8411	-0.0208388	0.223915	0.979377	0.925851	-0.116483	0.222773	0.890045	0.60106
Injuries to the nervous system	injuries & poisonings	907	logistic	29042	33	29009	0.137	0.174	1.147	0.431	0.039	0.174	1.04	0.822	10246	23	10223	0.174099	0.21455	1.19017	0.4171	-0.127747	0.215999	0.880076	0.554238
Disorders of optic nerve and visual pathways	sense organs	377	logistic	26623	191	26432	-0.057	0.073	0.944	0.432	0.067	0.073	1.069	0.36	8473	150	8323	-0.099198	0.0853629	0.905563	0.245206	-0.0796502	0.0874121	0.923439	0.362188
Spinal stenosis of lumbar region	musculoskeletal	720.1	logistic	25192	825	24367	0.028	0.036	1.029	0.433	-0.055	0.036	0.947	0.126	8357	348	8009	-0.0148755	0.0574343	0.985235	0.795635	-0.0789069	0.0580098	0.924126	0.173756
Fracture of humerus	injuries & poisonings	803.1	logistic	27002	144	26858	0.066	0.084	1.068	0.433	-0.111	0.084	0.895	0.187	9117	37	9080	0.0221836	0.171768	1.02243	0.89724	-0.170968	0.173075	0.842848	0.323236
Varicose veins of lower extremity, symptomtic	circulatory system	454.11	logistic	20009	170	19839	0.061	0.077	1.062	0.434	-0.029	0.077	0.971	0.706	6570	80	6490	0.0322799	0.114604	1.03281	0.778201	-0.089235	0.116116	0.914631	0.442192
Arthropathy associated with neurological disorders	musculoskeletal	713.5	logistic	26288	29	26259	-0.146	0.187	0.864	0.434	-0.156	0.186	0.855	0.4	8531	10	8521	NA	NA	NA	NA	NA	NA	NA	NA
Bladder neck obstruction	genitourinary	596.1	logistic	26888	78	26810	-0.089	0.113	0.915	0.435	0.044	0.114	1.045	0.702	9350	25	9325	-0.0293594	0.222086	0.971067	0.894827	-0.277737	0.221194	0.757496	0.209252
Noninfectious gastroenteritis	digestive	558	logistic	21284	392	20892	-0.04	0.051	0.961	0.436	0.129	0.051	1.137	0.0114	6690	215	6475	0.0386176	0.071065	1.03937	0.586846	-0.0750084	0.0723198	0.927736	0.299654
Acquired toe deformities	musculoskeletal	735.2	logistic	26974	166	26808	0.061	0.078	1.063	0.437	-0.018	0.078	0.983	0.822	9083	131	8952	0.066329	0.09164	1.06858	0.469189	-0.125816	0.0928981	0.881777	0.175627
Fracture of patella	injuries & poisonings	800.4	logistic	26888	30	26858	-0.142	0.183	0.867	0.437	0.18	0.183	1.197	0.324	9092	12	9080	NA	NA	NA	NA	NA	NA	NA	NA
Other disorders of prostate	genitourinary	602	logistic	24129	172	23957	-0.06	0.078	0.941	0.438	0.059	0.078	1.061	0.451	8889	50	8839	-0.109054	0.153145	0.896682	0.476405	-0.0368276	0.146268	0.963842	0.801209
Actinic keratosis	dermatologic	702.1	logistic	26557	980	25577	-0.026	0.033	0.975	0.438	0.009	0.033	1.009	0.779	9872	3	9869	NA	NA	NA	NA	NA	NA	NA	NA
Proliferative glomerulonephritis	genitourinary	580.11	logistic	21469	32	21437	0.138	0.178	1.148	0.439	0.475	0.177	1.608	0.00745	6247	14	6233	NA	NA	NA	NA	NA	NA	NA	NA
Acute pain	neurological	338.1	logistic	25958	211	25747	0.054	0.069	1.055	0.44	-0.022	0.069	0.978	0.746	8069	210	7859	0.0165545	0.0722102	1.01669	0.818672	0.120423	0.0730094	1.12797	0.0990606
Muscular dystrophies and other myopathies	neurological	359	logistic	27202	120	27082	0.071	0.092	1.073	0.44	-0.01	0.092	0.99	0.915	9364	53	9311	0.201667	0.141425	1.22344	0.153879	0.108097	0.142742	1.11416	0.448877
Hypoventilation	respiratory	513.3	logistic	28364	66	28298	0.095	0.123	1.1	0.44	-0.117	0.123	0.89	0.343	9755	93	9662	-0.0387763	0.109151	0.961966	0.7224	-0.0235173	0.110991	0.976757	0.832196
Noninflammatory disorders of vagina	genitourinary	619.4	logistic	27726	129	27597	0.069	0.089	1.071	0.44	-0.113	0.09	0.893	0.21	8797	320	8477	0.0448541	0.0606156	1.04588	0.459314	-0.0330076	0.0622752	0.967531	0.596092
Other and unspecified disorders of back	musculoskeletal	724	logistic	24477	110	24367	-0.074	0.097	0.928	0.442	-0.003	0.096	0.997	0.976	8098	89	8009	-0.156875	0.111867	0.854811	0.160815	0.0272416	0.11248	1.02762	0.808632
Other symptoms referable to back	musculoskeletal	724.8	logistic	24401	34	24367	0.132	0.172	1.141	0.443	0.064	0.172	1.066	0.712	8047	38	8009	-0.19953	0.173053	0.819115	0.248911	-0.11523	0.17378	0.891161	0.50728
Dermatophytosis	infectious diseases	110.1	logistic	26165	492	25673	-0.035	0.046	0.966	0.444	0.034	0.045	1.034	0.459	8051	414	7637	-0.0987824	0.0524433	0.90594	0.0596188	-0.00654048	0.0525512	0.993481	0.900952
Keratoconjunctivitis	sense organs	370.3	logistic	26478	28	26450	0.147	0.192	1.158	0.444	0.204	0.189	1.227	0.28	8512	6	8506	NA	NA	NA	NA	NA	NA	NA	NA
Acute reaction to stress	mental disorders	300.8	logistic	19286	22	19264	0.163	0.213	1.177	0.445	-0.169	0.214	0.845	0.43	5759	25	5734	-0.19203	0.208052	0.825282	0.356012	-0.176917	0.216244	0.83785	0.413281
Prolapse of vaginal walls	genitourinary	618.1	logistic	28785	156	28629	0.062	0.082	1.064	0.446	-0.008	0.082	0.992	0.92	10124	52	10072	-0.0131401	0.142281	0.986946	0.926417	-0.0476102	0.143488	0.953505	0.740035
stress incontinence, female	genitourinary	624.9	logistic	27668	194	27474	0.055	0.072	1.057	0.446	0.099	0.072	1.104	0.172	8749	90	8659	-0.156029	0.107654	0.855534	0.147238	-0.109853	0.109494	0.895966	0.315729
Lymphoid leukemia, chronic	neoplasms	204.12	logistic	27460	175	27285	0.058	0.076	1.059	0.448	0.015	0.076	1.015	0.845	9865	16	9849	NA	NA	NA	NA	NA	NA	NA	NA
Neoplasm of uncertain behavior of skin	neoplasms	173	logistic	25142	1299	23843	-0.022	0.029	0.979	0.449	-0.042	0.029	0.959	0.143	9777	80	9697	0.00707614	0.113495	1.0071	0.950286	-0.0734354	0.115151	0.929196	0.523647
Diseases of nail, NOS	dermatologic	703	logistic	27216	100	27116	-0.076	0.1	0.927	0.449	-0.289	0.101	0.749	0.00409	9084	71	9013	0.136048	0.122531	1.14574	0.266862	0.00666901	0.123523	1.00669	0.956943
Open wounds of extremities	injuries & poisonings	871	logistic	27477	360	27117	-0.04	0.053	0.961	0.45	-0.018	0.053	0.982	0.737	9301	258	9043	0.0319791	0.0658865	1.0325	0.627417	-0.00653336	0.0661585	0.993488	0.921334
Secondary malignant neoplasm of digestive systems	neoplasms	198.3	logistic	23587	160	23427	-0.06	0.08	0.942	0.451	0.059	0.08	1.061	0.46	8960	34	8926	0.0831423	0.180895	1.0867	0.645792	0.384206	0.185657	1.46845	0.038505
Cholelithiasis with acute cholecystitis	digestive	574.11	logistic	27469	36	27433	-0.126	0.167	0.881	0.451	0.054	0.166	1.056	0.745	9509	15	9494	NA	NA	NA	NA	NA	NA	NA	NA
Absent or infrequent menstruation	genitourinary	626.11	logistic	25607	220	25387	0.053	0.07	1.054	0.451	0.063	0.07	1.065	0.372	7585	165	7420	-0.00215192	0.084056	0.99785	0.979576	0.0525013	0.0867806	1.0539	0.545186
Dysthymic disorder	mental disorders	300.4	logistic	19432	168	19264	0.058	0.078	1.06	0.452	0.022	0.078	1.022	0.778	5804	70	5734	0.0283234	0.123771	1.02873	0.818995	-0.0212771	0.128044	0.978948	0.868024
Late effects of cerebrovascular disease	circulatory system	433.8	logistic	24839	208	24631	-0.053	0.07	0.949	0.452	-0.113	0.07	0.893	0.106	8897	249	8648	-0.0353174	0.0668243	0.965299	0.597145	-0.0439345	0.067041	0.957017	0.512251
Stomatitis and mucositis	digestive	528.1	logistic	27163	145	27018	-0.063	0.084	0.939	0.452	-0.045	0.083	0.956	0.591	9439	17	9422	NA	NA	NA	NA	NA	NA	NA	NA
Polymyalgia Rheumatica	musculoskeletal	717	logistic	29061	123	28938	-0.069	0.091	0.933	0.452	-0.058	0.091	0.944	0.529	10278	31	10247	0.16343	0.191437	1.17754	0.393271	0.0848911	0.191838	1.0886	0.658117
Secondary malignancy of brain/spine	neoplasms	198.5	logistic	23651	224	23427	-0.051	0.067	0.951	0.453	0.205	0.067	1.228	0.00224	8976	50	8926	-0.0858421	0.146461	0.917739	0.557802	-0.14691	0.148553	0.863372	0.322694
Attention deficit hyperactivity disorder	mental disorders	313.1	logistic	28450	278	28172	0.046	0.061	1.047	0.453	-0.047	0.061	0.954	0.441	9968	40	9928	0.0806278	0.155496	1.08397	0.604095	-0.0811657	0.162734	0.922041	0.617946
Respiratory failure	respiratory	509.1	logistic	24558	548	24010	-0.032	0.043	0.968	0.453	-0.015	0.043	0.986	0.737	8502	342	8160	0.0367435	0.0569733	1.03743	0.518975	-0.0786658	0.0579176	0.924349	0.174388
Other vitamin B12 deficiency anemia	hematopoietic	281.12	logistic	20138	57	20081	-0.1	0.134	0.905	0.455	0.186	0.133	1.205	0.163	5266	65	5201	-0.0602528	0.132182	0.941526	0.64851	-0.159598	0.13448	0.852487	0.235314
Encounter for long-term (current) use of anticoagulants, antithrombotics, aspirin	circulatory system	457	logistic	21414	1575	19839	0.02	0.027	1.02	0.455	-0.029	0.027	0.971	0.27	7159	669	6490	0.0518479	0.0430827	1.05322	0.228802	-0.0244195	0.0439486	0.975876	0.578458
Nephritis; nephrosis; renal sclerosis	genitourinary	580	logistic	21796	359	21437	-0.04	0.053	0.961	0.455	0.127	0.053	1.136	0.017	6488	255	6233	0.0474184	0.0659659	1.04856	0.472244	0.126655	0.0669539	1.13503	0.0585346
Keratitis	sense organs	370	logistic	26520	70	26450	-0.09	0.121	0.914	0.456	0.222	0.12	1.249	0.0637	8540	34	8506	0.106403	0.177387	1.11227	0.548618	-0.00399645	0.180631	0.996012	0.982348
Complications of cardiac/vascular device, implant, and graft	injuries & poisonings	854	logistic	24874	584	24290	0.031	0.042	1.032	0.456	-0.038	0.042	0.963	0.364	8806	384	8422	0.0188525	0.0545218	1.01903	0.729509	0.0669774	0.0547523	1.06927	0.221224
Other disorders of bone and cartilage	musculoskeletal	733	logistic	26020	1166	24854	0.023	0.031	1.023	0.457	0.052	0.031	1.054	0.0859	8542	389	8153	-0.0561525	0.0544247	0.945395	0.302191	-0.0302299	0.0547561	0.970222	0.580892
Peyronie's disease	genitourinary	604.3	logistic	23824	43	23781	0.112	0.151	1.119	0.458	0.099	0.153	1.104	0.516	8424	7	8417	NA	NA	NA	NA	NA	NA	NA	NA
Arrhythmia (cardiac) NOS	circulatory system	427.5	logistic	15309	147	15162	-0.061	0.083	0.94	0.459	-0.126	0.083	0.881	0.127	5363	72	5291	0.0565059	0.119594	1.05813	0.636584	-0.188836	0.124211	0.827923	0.12844
Disturbances in tooth eruption	digestive	520.2	logistic	27607	33	27574	-0.13	0.176	0.878	0.459	0.309	0.174	1.362	0.0763	8829	17	8812	NA	NA	NA	NA	NA	NA	NA	NA
Dysmenorrhea	genitourinary	626.2	logistic	25454	67	25387	0.092	0.125	1.097	0.459	-0.161	0.124	0.852	0.196	7520	100	7420	0.0555925	0.109389	1.05717	0.611306	-0.116531	0.1108	0.890002	0.292927
Diseases of hair and hair follicles	dermatologic	704	logistic	27557	441	27116	-0.036	0.048	0.965	0.46	-0.08	0.048	0.923	0.0984	9303	290	9013	-0.0992967	0.0621585	0.905474	0.11016	0.0185566	0.0630434	1.01873	0.768493
Diseases of lips	digestive	528.5	logistic	27060	42	27018	-0.114	0.155	0.892	0.461	0.212	0.155	1.236	0.17	9432	10	9422	NA	NA	NA	NA	NA	NA	NA	NA
Sacroiliitis NEC	musculoskeletal	715.1	logistic	26115	55	26060	-0.101	0.136	0.904	0.461	-0.032	0.136	0.969	0.816	8674	47	8627	-0.177388	0.147183	0.837455	0.228118	0.0383312	0.149076	1.03908	0.797082
Separation of retinal layers	sense organs	362.31	logistic	26414	26	26388	-0.144	0.196	0.866	0.463	-0.182	0.195	0.833	0.351	8242	9	8233	NA	NA	NA	NA	NA	NA	NA	NA
Dermatochalasis	sense organs	374.6	logistic	26546	96	26450	-0.076	0.103	0.927	0.463	-0.106	0.103	0.9	0.307	8528	22	8506	0.231028	0.208904	1.25989	0.268766	-0.41508	0.21674	0.660288	0.0554791
Cervical cancer	neoplasms	180.1	logistic	24057	54	24003	-0.1	0.137	0.904	0.464	0.078	0.138	1.081	0.573	7301	47	7254	0.0475416	0.149694	1.04869	0.750795	0.218134	0.154308	1.24375	0.157471
Other symptoms involving abdomen and pelvis	digestive	579	logistic	26098	441	25657	0.035	0.048	1.036	0.466	-0.001	0.048	0.999	0.982	8511	232	8279	0.0591354	0.0686464	1.06092	0.388991	0.0570721	0.069376	1.05873	0.410708
Other inflammatory spondylopathies	musculoskeletal	715	logistic	26204	144	26060	0.061	0.084	1.063	0.466	0.032	0.084	1.032	0.705	8705	78	8627	-0.0894314	0.116456	0.914451	0.442523	0.0291319	0.117835	1.02956	0.804733
Bacteremia	infectious diseases	38.3	logistic	25506	258	25248	0.046	0.063	1.047	0.467	0.008	0.063	1.008	0.895	8310	151	8159	0.0735808	0.086066	1.07636	0.392587	0.0600121	0.0874002	1.06185	0.492312
Acute sinusitis	respiratory	464	logistic	24915	663	24252	0.029	0.04	1.029	0.467	0.048	0.039	1.049	0.223	7100	280	6820	0.0227513	0.0625302	1.02301	0.715974	0.0385414	0.0645277	1.03929	0.550317
Other abnormal glucose	endocrine/metabolic	250.42	logistic	21661	1202	20459	-0.022	0.03	0.979	0.469	-0.009	0.03	0.991	0.76	6504	1035	5469	-0.0394829	0.0361252	0.961286	0.274417	-0.0387069	0.0363606	0.962033	0.28709
Rhesus isoimmunization in pregnancy	pregnancy complications	654.2	logistic	28555	94	28461	-0.077	0.106	0.926	0.469	0.204	0.105	1.227	0.0522	9601	57	9544	0.00620015	0.139539	1.00622	0.964559	-0.0607831	0.142978	0.941027	0.670747
Electrolyte imbalance	endocrine/metabolic	276.1	logistic	24136	2773	21363	0.015	0.02	1.015	0.47	-0.013	0.02	0.987	0.515	8228	1687	6541	0.0107711	0.0291748	1.01083	0.711986	0.0395909	0.0292139	1.04039	0.175351
Generalized anxiety disorder	mental disorders	300.11	logistic	19729	465	19264	0.034	0.047	1.035	0.47	0.015	0.048	1.015	0.757	5927	193	5734	-0.114448	0.0751227	0.891859	0.127639	0.0737094	0.0775424	1.07649	0.341823
Carditis	circulatory system	420	logistic	25150	618	24532	0.029	0.041	1.03	0.471	0.026	0.041	1.027	0.518	8891	259	8632	-0.0108257	0.0654845	0.989233	0.868694	0.0455612	0.0664539	1.04662	0.492961
Diseases of pulp and periapical tissues	digestive	522	logistic	27599	25	27574	0.146	0.202	1.157	0.471	0.332	0.202	1.394	0.0994	8866	54	8812	-0.0828936	0.141834	0.920449	0.558924	0.0607099	0.145504	1.06259	0.676503
Disorders resulting from impaired renal function	genitourinary	588	logistic	21701	264	21437	0.045	0.062	1.046	0.471	-0.118	0.062	0.889	0.0573	6578	345	6233	-0.058268	0.0591529	0.943397	0.324604	0.0183514	0.0602856	1.01852	0.760817
Gangrene	symptoms	791	logistic	29041	47	28994	-0.105	0.146	0.9	0.472	0.172	0.146	1.188	0.239	10213	44	10169	-0.0627269	0.158473	0.9392	0.692237	0.200376	0.161897	1.22186	0.215837
Poisoning by agents primarily affecting the cardiovascular system	injuries & poisonings	972	logistic	22664	36	22628	0.12	0.167	1.128	0.472	-0.129	0.167	0.879	0.437	7583	22	7561	0.00131674	0.229519	1.00132	0.995423	0.300269	0.23394	1.35022	0.199306
Dysmetabolic syndrome X	endocrine/metabolic	277.7	logistic	27477	249	27228	0.046	0.064	1.047	0.473	-0.014	0.064	0.986	0.824	9486	48	9438	0.0959468	0.150178	1.1007	0.522896	0.16439	0.15181	1.17867	0.278867
Tachycardia NOS	circulatory system	427.7	logistic	15691	529	15162	-0.032	0.044	0.969	0.473	-0.028	0.044	0.972	0.524	5745	454	5291	0.0828555	0.0507608	1.08638	0.102622	0.0511632	0.0513662	1.05249	0.319226
Abnormal sputum	respiratory	516	logistic	28773	197	28576	0.051	0.072	1.053	0.475	0.117	0.072	1.125	0.101	9979	140	9839	-0.0807922	0.0891832	0.922385	0.364982	-0.0157412	0.0895673	0.984382	0.860493
Insect bite	injuries & poisonings	912	logistic	28774	45	28729	-0.107	0.15	0.899	0.475	-0.018	0.15	0.982	0.903	10102	19	10083	NA	NA	NA	NA	NA	NA	NA	NA
Chronic kidney disease, Stage I or II	genitourinary	585.4	logistic	21703	266	21437	0.044	0.062	1.045	0.477	-0.034	0.062	0.967	0.586	6494	261	6233	0.0173113	0.0657444	1.01746	0.79231	0.0599588	0.0671454	1.06179	0.371873
Benign neoplasm of pituitary gland and craniopharyngeal duct (pouch)	neoplasms	227.3	logistic	27860	147	27713	-0.059	0.083	0.943	0.478	0.188	0.083	1.207	0.0232	9958	66	9892	-0.17346	0.128769	0.840751	0.17796	-0.179896	0.131111	0.835357	0.170035
Nonspecific abnormal findings on radiological and other examination of biliary tract	digestive	575.9	logistic	27471	38	27433	0.115	0.163	1.122	0.478	-0.194	0.162	0.824	0.232	9517	23	9494	0.0596967	0.210245	1.06151	0.776457	0.0967915	0.214013	1.10163	0.651075
Urethral stricture (not specified as infectious)	genitourinary	597.1	logistic	26944	134	26810	0.062	0.087	1.064	0.478	0.129	0.087	1.138	0.138	9377	52	9325	0.0201032	0.143446	1.02031	0.888546	0.0123492	0.143638	1.01243	0.931487
Acute rheumatic heart disease	circulatory system	394.4	logistic	21988	25	21963	-0.143	0.203	0.867	0.481	0.168	0.2	1.183	0.403	8374	6	8368	NA	NA	NA	NA	NA	NA	NA	NA
Occlusion of cerebral arteries, with cerebral infarction	circulatory system	433.11	logistic	24701	70	24631	0.085	0.12	1.088	0.481	0.039	0.12	1.04	0.743	8702	54	8648	0.130061	0.140556	1.1389	0.354796	-0.034098	0.144614	0.966477	0.813599
Viral hepatitis	infectious diseases	70	logistic	25302	583	24719	-0.029	0.042	0.971	0.485	0.019	0.042	1.019	0.653	7852	596	7256	0.0412334	0.0448887	1.0421	0.358321	0.0731052	0.0452714	1.07584	0.10635
Abnormal spermatozoa	genitourinary	609.2	logistic	23810	29	23781	0.128	0.185	1.137	0.488	0.181	0.187	1.198	0.333	8428	11	8417	NA	NA	NA	NA	NA	NA	NA	NA
Cancer of major salivary glands	neoplasms	145.3	logistic	28379	42	28337	0.106	0.154	1.112	0.491	0.057	0.154	1.059	0.711	10175	8	10167	NA	NA	NA	NA	NA	NA	NA	NA
Hyperosmolality and/or hypernatremia	endocrine/metabolic	276.11	logistic	21403	40	21363	-0.109	0.158	0.897	0.491	-0.157	0.158	0.855	0.321	6600	59	6541	-0.0290646	0.136312	0.971354	0.831154	-0.0725481	0.136454	0.930021	0.594956
Aspergillosis	infectious diseases	117.4	logistic	25748	75	25673	0.079	0.116	1.083	0.492	0.014	0.115	1.014	0.907	7658	21	7637	-0.329438	0.229168	0.719328	0.150565	-0.055701	0.229699	0.945822	0.808396
Disorders of mineral metabolism	endocrine/metabolic	275	logistic	27018	1792	25226	-0.017	0.025	0.983	0.492	0.024	0.024	1.024	0.325	9359	986	8373	0.0327703	0.0350703	1.03331	0.350088	0.0432895	0.0353228	1.04424	0.220373
Coagulation defects complicating pregnancy or postpartum	hematopoietic	286.3	logistic	20786	45	20741	0.103	0.15	1.109	0.492	-0.145	0.151	0.865	0.337	8007	34	7973	0.0909145	0.180385	1.09518	0.614259	0.0429846	0.185658	1.04392	0.816907
Dizziness and giddiness (Light-headedness and vertigo)	sense organs	386.9	logistic	25845	1583	24262	-0.018	0.026	0.982	0.492	0.01	0.026	1.01	0.71	8643	1017	7626	0.0240075	0.0352526	1.0243	0.495863	0.0442151	0.0354553	1.04521	0.212373
Lack of coordination	neurological	350.3	logistic	26124	92	26032	0.072	0.105	1.075	0.493	-0.143	0.104	0.867	0.169	8674	44	8630	-0.133678	0.151081	0.874872	0.376262	-0.0354271	0.152827	0.965193	0.816684
Varicose veins of lower extremity	circulatory system	454.1	logistic	20099	260	19839	0.043	0.063	1.044	0.493	-0.014	0.062	0.986	0.822	6608	118	6490	0.0444158	0.0943032	1.04542	0.637648	-0.124733	0.0958208	0.882733	0.193009
Meniere's disease	sense organs	386.1	logistic	24300	38	24262	0.111	0.163	1.118	0.494	0.02	0.162	1.02	0.904	7630	4	7626	NA	NA	NA	NA	NA	NA	NA	NA
Paroxysmal tachycardia, unspecified	circulatory system	427.1	logistic	17366	2204	15162	0.016	0.023	1.016	0.496	-0.018	0.023	0.982	0.443	5948	657	5291	0.0807661	0.0430808	1.08412	0.0608257	0.026757	0.0437632	1.02712	0.540933
Left bundle branch block	circulatory system	426.32	logistic	15694	532	15162	-0.03	0.045	0.97	0.497	0.031	0.045	1.031	0.489	5431	140	5291	0.0639559	0.088567	1.06605	0.470221	-0.000810202	0.089672	0.99919	0.992791
Hypotension	circulatory system	458	logistic	24575	858	23717	0.024	0.035	1.024	0.498	-0.073	0.035	0.93	0.037	7940	480	7460	0.0448641	0.0495807	1.04589	0.365534	0.0210457	0.0498581	1.02127	0.672943
Nasal polyps	respiratory	471	logistic	21926	143	21783	0.057	0.084	1.059	0.498	0.061	0.083	1.063	0.462	6193	32	6161	0.325655	0.181548	1.38494	0.0728501	-0.227413	0.183134	0.796592	0.214317
Pruritus and related conditions	dermatologic	698	logistic	28068	291	27777	-0.04	0.059	0.961	0.498	0.002	0.059	1.002	0.975	9316	336	8980	-0.0742294	0.0584574	0.928459	0.204154	0.0388469	0.0587988	1.03961	0.50882
Open-angle glaucoma	sense organs	365.1	logistic	27041	336	26705	-0.038	0.055	0.963	0.499	0.012	0.055	1.012	0.823	9035	501	8534	0.0433613	0.0491632	1.04432	0.377784	-0.0485864	0.0496637	0.952575	0.327922
Unstable angina (intermediate coronary syndrome)	circulatory system	411.1	logistic	20632	385	20247	-0.035	0.052	0.966	0.499	-0.102	0.052	0.903	0.0517	7877	165	7712	0.141304	0.0823946	1.15177	0.0863509	-0.0718141	0.0827366	0.930704	0.385403
Gastrointestinal complications	digestive	569.2	logistic	25978	143	25835	0.057	0.084	1.058	0.499	0.024	0.084	1.024	0.778	8682	39	8643	0.0550016	0.168442	1.05654	0.744023	0.268758	0.170521	1.30834	0.115003
Other diseases of lung	respiratory	510	logistic	28181	588	27593	0.028	0.042	1.029	0.5	-0.051	0.042	0.95	0.221	9886	211	9675	-0.00778073	0.0707241	0.992249	0.912397	0.0291157	0.0711991	1.02954	0.682589
Cancer of liver and intrahepatic bile duct	neoplasms	155	logistic	26158	205	25953	0.047	0.07	1.048	0.501	0.086	0.07	1.09	0.219	9511	82	9429	0.00918342	0.114803	1.00923	0.936243	0.109562	0.115687	1.11579	0.343608
Ulcerative colitis	digestive	555.2	logistic	21201	309	20892	-0.039	0.058	0.962	0.501	-0.039	0.057	0.962	0.495	6521	46	6475	0.069406	0.153151	1.07187	0.650415	0.0752835	0.156817	1.07819	0.631177
Elevated sedimentation rate	symptoms	790.1	logistic	26094	47	26047	-0.099	0.148	0.906	0.502	0.257	0.147	1.293	0.0805	8553	52	8501	-0.149917	0.147662	0.860779	0.309976	-0.084683	0.147087	0.918803	0.564795
Acquired spondylolisthesis	musculoskeletal	738.4	logistic	27033	225	26808	-0.045	0.067	0.956	0.504	-0.042	0.067	0.959	0.53	9042	90	8952	0.0790175	0.109588	1.08222	0.470883	-0.130601	0.111395	0.877568	0.241029
Calculus of bile duct	digestive	574.2	logistic	27545	112	27433	0.063	0.095	1.065	0.505	-0.114	0.095	0.893	0.231	9541	47	9494	0.0716777	0.152873	1.07431	0.639161	0.158442	0.155142	1.17168	0.307124
Disturbances of amino-acid transport	endocrine/metabolic	270.1	logistic	27540	29	27511	-0.124	0.187	0.883	0.506	0.201	0.186	1.223	0.278	9059	6	9053	NA	NA	NA	NA	NA	NA	NA	NA
Disorders of fluid, electrolyte, and acid-base balance	endocrine/metabolic	276	logistic	25611	4248	21363	0.011	0.017	1.011	0.509	-0.008	0.017	0.992	0.628	8896	2355	6541	0.00863469	0.0258702	1.00867	0.738554	0.013608	0.0258234	1.0137	0.59822
Pseudomonal pneumonia	respiratory	480.12	logistic	24968	52	24916	0.091	0.138	1.096	0.509	-0.173	0.14	0.841	0.215	7939	9	7930	NA	NA	NA	NA	NA	NA	NA	NA
Osteitis deformans and osteopathies associated with other disorders classified elsewhere	musculoskeletal	731	logistic	24874	20	24854	-0.147	0.222	0.863	0.509	0.224	0.224	1.251	0.317	8177	24	8153	-0.0620202	0.215486	0.939864	0.773488	-0.0562632	0.217204	0.94529	0.795609
Syncope and collapse	symptoms	788	logistic	27723	1020	26703	-0.021	0.032	0.979	0.509	-0.042	0.032	0.959	0.188	9557	640	8917	0.0232376	0.0424164	1.02351	0.583799	0.0741901	0.0427931	1.07701	0.0829726
Malignant neoplasm of testis	neoplasms	187.2	logistic	27169	128	27041	0.059	0.089	1.06	0.511	0.031	0.089	1.032	0.728	9676	7	9669	NA	NA	NA	NA	NA	NA	NA	NA
Chronic Kidney Disease, Stage IV	genitourinary	585.34	logistic	21914	477	21437	-0.031	0.047	0.97	0.511	-0.037	0.046	0.964	0.424	6602	369	6233	0.0673563	0.0574396	1.06968	0.240938	-0.0172158	0.0579406	0.982932	0.766368
Chronic cystitis	genitourinary	592.12	logistic	23309	22	23287	0.14	0.215	1.151	0.513	0.178	0.215	1.195	0.408	6896	4	6892	NA	NA	NA	NA	NA	NA	NA	NA
Optic neuritis/neuropathy	sense organs	377.3	logistic	26520	88	26432	-0.07	0.107	0.932	0.514	0.026	0.107	1.026	0.81	8381	58	8323	-0.0258273	0.136998	0.974503	0.850467	-0.18435	0.140283	0.831644	0.188802
Empyema and pneumothorax	respiratory	506	logistic	24198	188	24010	0.048	0.073	1.049	0.514	-0.041	0.073	0.96	0.58	8206	46	8160	-0.206126	0.149564	0.813731	0.16815	0.0366821	0.150827	1.03736	0.807845
Other disorders of arteries and arterioles	circulatory system	447	logistic	23911	1014	22897	0.021	0.032	1.021	0.515	-0.035	0.032	0.966	0.28	8670	259	8411	-0.0446097	0.0651305	0.956371	0.493389	0.0274545	0.0656851	1.02783	0.675967
Hematemesis	digestive	578.1	logistic	25694	37	25657	-0.107	0.165	0.898	0.515	-0.205	0.166	0.815	0.216	8333	54	8279	-0.229762	0.141073	0.794723	0.103383	0.0158484	0.143423	1.01597	0.912012
Nonspecific abnormal findings in stool contents	digestive	579.8	logistic	25787	130	25657	-0.058	0.088	0.944	0.515	0.072	0.088	1.074	0.415	8354	75	8279	0.123948	0.118351	1.13196	0.294967	0.15163	0.119484	1.16373	0.204425
Unspecified osteomyelitis	musculoskeletal	710.19	logistic	26370	111	26259	0.062	0.095	1.064	0.515	0.134	0.095	1.144	0.158	8614	93	8521	-0.0742678	0.109285	0.928423	0.496773	0.196217	0.110726	1.21679	0.0763788
Ischemic Heart Disease	circulatory system	411	logistic	26887	6640	20247	0.01	0.016	1.01	0.516	-0.026	0.016	0.975	0.106	9448	1736	7712	0.0488161	0.0293785	1.05003	0.096587	0.0208437	0.0295361	1.02106	0.480372
Malignant neoplasm of bladder	neoplasms	189.21	logistic	28325	590	27735	-0.027	0.042	0.973	0.518	0.023	0.042	1.024	0.578	10030	84	9946	-0.0751087	0.112262	0.927643	0.503465	0.0368789	0.114409	1.03757	0.747194
Other specified diseases of hair and hair follicles	dermatologic	704.8	logistic	27158	42	27116	0.1	0.155	1.106	0.518	-0.151	0.154	0.859	0.327	9046	33	9013	0.0827159	0.186642	1.08623	0.657635	0.256127	0.184948	1.29192	0.166097
Spondylosis with myelopathy	musculoskeletal	721.2	logistic	24576	209	24367	-0.045	0.07	0.956	0.518	-0.023	0.07	0.978	0.746	8103	94	8009	-0.0686122	0.107607	0.933689	0.523721	-0.0985739	0.10775	0.906129	0.360275
Congenital coagulation defects	hematopoietic	286.1	logistic	20807	66	20741	0.08	0.124	1.083	0.519	-0.096	0.124	0.909	0.44	7987	14	7973	NA	NA	NA	NA	NA	NA	NA	NA
Hemorrhage of rectum and anus	digestive	578.8	logistic	25928	271	25657	-0.04	0.061	0.961	0.519	-0.008	0.061	0.992	0.897	8490	211	8279	-0.0638315	0.0723414	0.938163	0.37758	0.00864858	0.0733271	1.00869	0.906111
Other nondiabetic retinopathy	sense organs	362.3	logistic	26434	46	26388	-0.096	0.148	0.909	0.52	-0.018	0.147	0.982	0.901	8281	48	8233	0.124529	0.15013	1.13262	0.406835	0.00755701	0.153206	1.00759	0.96066
Disorders of tooth development	digestive	520	logistic	27611	37	27574	-0.107	0.165	0.899	0.52	0.227	0.165	1.255	0.168	8831	19	8812	NA	NA	NA	NA	NA	NA	NA	NA
Hydrocele	genitourinary	603.1	logistic	23843	62	23781	0.081	0.127	1.085	0.521	0.012	0.127	1.012	0.923	8451	34	8417	-0.0980095	0.180252	0.90664	0.586623	0.276017	0.178546	1.31787	0.122124
Circadian rhythm sleep disorder	neurological	327.6	logistic	21427	36	21391	-0.108	0.169	0.898	0.522	-0.025	0.166	0.976	0.882	6440	42	6398	-0.182295	0.156782	0.833355	0.24494	0.253982	0.162033	1.28915	0.117006
Other disorders of cervical region	musculoskeletal	723	logistic	24420	53	24367	0.089	0.139	1.093	0.522	-0.122	0.138	0.885	0.378	8045	36	8009	-0.116006	0.175169	0.89047	0.507811	0.0974187	0.176532	1.10232	0.581053
Benign neoplasm of ovary	neoplasms	220	logistic	23455	23	23432	0.135	0.212	1.145	0.523	-0.146	0.21	0.865	0.488	7661	32	7629	0.0294426	0.181994	1.02988	0.87148	-0.0103485	0.187176	0.989705	0.955909
Lung transplant	respiratory	510.2	logistic	27885	292	27593	0.038	0.059	1.038	0.523	-0.054	0.059	0.947	0.354	9712	37	9675	0.00965178	0.167454	1.0097	0.954037	0.0607217	0.16682	1.0626	0.715862
Acquired absence of breast	neoplasms	175	logistic	25059	1456	23603	0.017	0.027	1.018	0.525	0.033	0.027	1.034	0.221	8165	612	7553	-0.00228453	0.0443207	0.997718	0.958891	0.0269593	0.0444995	1.02733	0.544625
Atrophic gastritis	digestive	535.2	logistic	26137	44	26093	0.095	0.15	1.1	0.526	0.174	0.151	1.19	0.247	8472	49	8423	0.0653287	0.150313	1.06751	0.66384	-0.192368	0.151943	0.825003	0.205493
Other upper respiratory disease	respiratory	479	logistic	22490	707	21783	-0.024	0.038	0.976	0.527	0.006	0.038	1.006	0.879	6565	404	6161	-0.0373134	0.0530146	0.963374	0.481538	-0.0205897	0.053992	0.979621	0.702945
Chronic pancreatitis	digestive	577.2	logistic	28212	71	28141	0.075	0.119	1.078	0.527	-0.099	0.119	0.906	0.408	9925	40	9885	0.0773676	0.163544	1.08044	0.636164	0.243012	0.167904	1.27508	0.147806
Suicide or self-inflicted injury	mental disorders	297.2	logistic	19286	22	19264	-0.135	0.215	0.873	0.528	-0.135	0.214	0.874	0.529	5761	27	5734	-0.155169	0.201977	0.856271	0.442339	0.220323	0.208753	1.24648	0.291232
Other hypertensive complications	circulatory system	401.3	logistic	13783	344	13439	0.034	0.054	1.035	0.528	0.012	0.055	1.012	0.83	3843	356	3487	0.0690829	0.0607349	1.07153	0.25535	0.219924	0.0628059	1.24598	0.0004624
Other specified osteoporosis	musculoskeletal	743.13	logistic	25840	46	25794	-0.094	0.148	0.911	0.528	-0.085	0.148	0.919	0.567	9251	20	9231	0.0330097	0.228228	1.03356	0.884999	0.0813414	0.230979	1.08474	0.724719
Adrenal hyperfunction	endocrine/metabolic	255.1	logistic	25966	121	25845	-0.058	0.092	0.944	0.529	0.028	0.091	1.028	0.762	8671	76	8595	0.127938	0.118938	1.13648	0.282074	-0.201988	0.119846	0.817105	0.0919114
Juvenile rheumatoid arthritis	musculoskeletal	714.2	logistic	26081	21	26060	0.138	0.22	1.148	0.53	0.305	0.217	1.357	0.161	8638	11	8627	NA	NA	NA	NA	NA	NA	NA	NA
Rosacea	dermatologic	695.3	logistic	24435	231	24204	0.042	0.066	1.042	0.531	-0.042	0.066	0.959	0.529	8033	11	8022	NA	NA	NA	NA	NA	NA	NA	NA
Malignant neoplasm of kidney, except pelvis	neoplasms	189.11	logistic	28248	513	27735	0.028	0.045	1.028	0.532	-0.003	0.045	0.997	0.939	10115	169	9946	-0.00640399	0.0807911	0.993616	0.936821	0.111166	0.0810535	1.11758	0.170215
Diseases of the salivary glands	digestive	527	logistic	27468	450	27018	0.03	0.048	1.03	0.532	-0.037	0.048	0.963	0.432	9546	124	9422	-0.113618	0.0935659	0.892599	0.224631	-0.173493	0.09501	0.840723	0.0678426
Chronic obstructive asthma	respiratory	495.1	logistic	22969	46	22923	0.092	0.147	1.096	0.533	-0.094	0.147	0.911	0.525	7139	97	7042	-0.0420875	0.10851	0.958786	0.698113	-0.0303873	0.110209	0.97007	0.782759
Dyschromia and Vitiligo	dermatologic	694	logistic	24702	498	24204	-0.028	0.046	0.972	0.534	0.028	0.045	1.028	0.539	8176	154	8022	-0.118802	0.084021	0.887984	0.157377	-0.124727	0.085339	0.882738	0.143864
Diseases of white blood cells	hematopoietic	288	logistic	24830	864	23966	0.021	0.035	1.022	0.535	-0.055	0.035	0.947	0.113	8369	405	7964	-0.0047225	0.0516779	0.995289	0.927188	0.145395	0.0527441	1.1565	0.00584043
Hemoptysis	respiratory	516.1	logistic	28758	182	28576	0.046	0.075	1.047	0.535	0.153	0.074	1.166	0.0398	9964	125	9839	-0.0911234	0.0937343	0.912905	0.330978	0.00622074	0.0942699	1.00624	0.947387
Neuralgia, neuritis, and radiculitis NOS	symptoms	766	logistic	25569	196	25373	-0.044	0.072	0.956	0.537	-0.045	0.072	0.956	0.532	7991	158	7833	0.00297627	0.0842384	1.00298	0.971815	-0.0707397	0.0847959	0.931704	0.404148
Cancer of intrathoracic organs	neoplasms	164	logistic	28168	34	28134	0.106	0.173	1.112	0.538	-0.308	0.172	0.735	0.0733	10047	9	10038	NA	NA	NA	NA	NA	NA	NA	NA
Hyperplasia of prostate	genitourinary	600	logistic	25872	1915	23957	-0.016	0.026	0.984	0.538	0.058	0.026	1.059	0.029	9403	564	8839	-0.0877629	0.0534722	0.915978	0.100739	-0.000374558	0.0536956	0.999626	0.994434
Tobacco use disorder	mental disorders	318	logistic	23999	3383	20616	-0.011	0.019	0.989	0.539	0.014	0.019	1.014	0.449	8452	2399	6053	-0.0134036	0.0255479	0.986686	0.599831	0.0101031	0.0258596	1.01015	0.696025
Breast cancer [female]	neoplasms	174.1	logistic	25654	1171	24483	0.019	0.032	1.019	0.541	0.022	0.031	1.022	0.486	8600	389	8211	-0.0742699	0.0551365	0.928421	0.177974	0.0603291	0.0560657	1.06219	0.281908
Other disorders of thyroid	endocrine/metabolic	246	logistic	22671	356	22315	-0.033	0.054	0.967	0.541	-0.032	0.054	0.969	0.553	8341	134	8207	-0.11675	0.0889702	0.889807	0.189439	-0.0191122	0.0906534	0.981069	0.833022
Diseases of the oral soft tissues, excluding lesions specific for gingiva and tongue	digestive	528	logistic	27401	383	27018	-0.032	0.052	0.969	0.541	0.013	0.051	1.013	0.802	9541	119	9422	0.0439118	0.0949904	1.04489	0.643883	0.0111664	0.0964928	1.01123	0.907872
Benign neoplasm of other endocrine glands and related structures	neoplasms	227	logistic	27973	260	27713	-0.038	0.062	0.963	0.543	0.104	0.062	1.11	0.0948	10021	129	9892	-0.0998651	0.0908883	0.904959	0.271869	-0.0685462	0.0923244	0.93375	0.457815
Strabismus and other disorders of binocular eye movements	sense organs	378	logistic	26641	209	26432	0.042	0.07	1.043	0.544	0.039	0.069	1.04	0.573	8397	74	8323	-0.082206	0.117602	0.921082	0.484542	-0.0271845	0.120453	0.973182	0.821446
Otitis externa	sense organs	380.1	logistic	27598	121	27477	0.055	0.091	1.057	0.544	0.177	0.091	1.194	0.0511	9388	90	9298	0.110496	0.109579	1.11683	0.313278	-0.109441	0.109925	0.896335	0.319447
Inflammatory conditions of jaw	digestive	526.5	logistic	27602	28	27574	-0.115	0.19	0.891	0.545	0.116	0.188	1.123	0.539	8822	10	8812	NA	NA	NA	NA	NA	NA	NA	NA
Peripheral vascular disease, unspecified	circulatory system	443.9	logistic	24065	1168	22897	-0.019	0.031	0.982	0.546	-0.019	0.031	0.982	0.544	8916	505	8411	-0.0621536	0.0486807	0.939739	0.201687	-0.0417412	0.0492332	0.959118	0.396534
Herpes zoster	infectious diseases	53	logistic	24933	214	24719	0.041	0.069	1.042	0.547	-0.038	0.069	0.963	0.585	7392	136	7256	0.0823653	0.0876005	1.08585	0.347095	0.0849042	0.09017	1.08861	0.346397
Open wounds of head; neck; and trunk	injuries & poisonings	870	logistic	27393	276	27117	-0.037	0.061	0.964	0.547	0.104	0.061	1.109	0.087	9215	172	9043	0.0999063	0.0795759	1.10507	0.209303	-0.0306453	0.0795523	0.969819	0.700073
Dysuria	genitourinary	599.3	logistic	22806	553	22253	0.026	0.043	1.026	0.549	-0.015	0.043	0.985	0.73	6940	451	6489	0.100616	0.0508921	1.10585	0.0480371	0.0464752	0.0511965	1.04757	0.363994
Other dyschromia	dermatologic	694.2	logistic	24662	458	24204	-0.029	0.048	0.972	0.549	0.023	0.047	1.023	0.627	8147	125	8022	-0.0626031	0.0931755	0.939316	0.501658	-0.196473	0.0946542	0.821624	0.0379226
Hypothermia/Chills	symptoms	780	logistic	28842	42	28800	0.093	0.155	1.097	0.549	0.196	0.154	1.217	0.203	10024	35	9989	0.0115304	0.173654	1.0116	0.94706	-0.105916	0.175566	0.8995	0.546321
Aneurysm of artery of lower extremity	circulatory system	442.3	logistic	22954	57	22897	0.079	0.132	1.082	0.55	0.083	0.132	1.086	0.531	8420	9	8411	NA	NA	NA	NA	NA	NA	NA	NA
Impaired fasting glucose	endocrine/metabolic	250.41	logistic	20997	538	20459	0.026	0.044	1.027	0.551	-0.025	0.044	0.975	0.562	5686	217	5469	-0.0689694	0.0707994	0.933355	0.329981	-0.190091	0.0721745	0.826884	0.00844427
Hyperparathyroidism	endocrine/metabolic	252.1	logistic	26234	389	25845	-0.031	0.051	0.97	0.552	0.006	0.051	1.006	0.901	8833	238	8595	-0.0146658	0.0683911	0.985441	0.830204	-0.0559681	0.0692136	0.945569	0.418729
Personal history of diseases of digestive system	digestive	564.9	logistic	20980	88	20892	-0.064	0.107	0.938	0.552	0.058	0.107	1.059	0.589	6521	46	6475	-0.0190581	0.148322	0.981122	0.89776	-0.0413764	0.153136	0.959468	0.78701
Disorders involving the immune mechanism	endocrine/metabolic	279	logistic	28111	1222	26889	0.017	0.029	1.018	0.553	-0.026	0.029	0.974	0.375	9787	531	9256	-0.0383231	0.0460854	0.962402	0.405653	0.0311379	0.0465284	1.03163	0.503353
Essential tremor	neurological	333.1	logistic	25099	119	24980	-0.055	0.092	0.947	0.553	0	0.092	1	0.998	8390	21	8369	0.249771	0.236832	1.28373	0.291593	-0.143239	0.236501	0.866547	0.544741
Abnormal findings on examination of urine	genitourinary	598	logistic	28859	95	28764	-0.061	0.103	0.94	0.553	0.019	0.103	1.019	0.854	10074	69	10005	0.107646	0.127019	1.11365	0.396729	-0.195436	0.127757	0.822476	0.12608
Symptoms of the muscles	symptoms	772	logistic	27359	325	27034	-0.033	0.056	0.967	0.553	0.028	0.056	1.029	0.615	9012	227	8785	-0.0154654	0.0699815	0.984654	0.825098	-0.00473791	0.0707838	0.995273	0.946633
Thyrotoxicosis with or without goiter	endocrine/metabolic	242	logistic	22666	351	22315	-0.032	0.054	0.968	0.554	-0.012	0.054	0.988	0.818	8497	290	8207	0.0769113	0.0626837	1.07995	0.219832	0.0740601	0.0632729	1.07687	0.241805
Other alveolar and parietoalveolar pneumonopathy	respiratory	504	logistic	24399	389	24010	-0.03	0.051	0.97	0.554	-0.071	0.051	0.931	0.165	8272	112	8160	0.0063443	0.0975164	1.00636	0.948127	0.0260122	0.0987109	1.02635	0.792151
Intervertebral disc disorder with myelopathy	musculoskeletal	722.7	logistic	24388	21	24367	-0.13	0.22	0.878	0.554	0.336	0.217	1.4	0.122	8038	29	8009	-0.338205	0.196009	0.713049	0.0844449	-0.28255	0.198798	0.753859	0.155233
Dermatophytosis / Dermatomycosis	infectious diseases	110	logistic	26217	544	25673	-0.026	0.044	0.975	0.555	0.03	0.043	1.031	0.481	8104	467	7637	-0.10721	0.0493843	0.898337	0.0299363	0.0133908	0.0494876	1.01348	0.786706
Mobitz II AV block	circulatory system	426.22	logistic	15191	29	15162	-0.109	0.186	0.897	0.557	-0.252	0.185	0.777	0.174	5295	4	5291	NA	NA	NA	NA	NA	NA	NA	NA
Other specified disorders of breast	genitourinary	613.8	logistic	28128	44	28084	-0.09	0.153	0.914	0.557	0.094	0.152	1.098	0.537	9391	26	9365	-0.102593	0.199723	0.902494	0.607479	-0.0742969	0.204454	0.928396	0.716313
Corns and callosities	dermatologic	700	logistic	26578	21	26557	0.129	0.219	1.138	0.557	-0.567	0.218	0.567	0.0093	9221	37	9184	-0.287362	0.172077	0.75024	0.0949263	0.0853855	0.173785	1.08914	0.623195
Disorders of muscle, ligament, and fascia	musculoskeletal	728	logistic	23622	149	23473	-0.048	0.082	0.953	0.557	0.022	0.082	1.022	0.787	6813	80	6733	0.0510371	0.116226	1.05236	0.660574	-0.00392487	0.119185	0.996083	0.97373
Disorders of calcium/phosphorus metabolism	endocrine/metabolic	275.5	logistic	25824	598	25226	-0.024	0.041	0.976	0.558	0.066	0.041	1.069	0.109	8751	378	8373	0.0330419	0.0548936	1.03359	0.547223	0.0244616	0.0553846	1.02476	0.658729
Allergies, other	injuries & poisonings	949	logistic	23797	400	23397	0.03	0.051	1.03	0.558	0.043	0.051	1.044	0.39	7754	341	7413	0.00849653	0.0574366	1.00853	0.882399	-0.00597132	0.0582962	0.994046	0.918415
Vitiligo	dermatologic	694.1	logistic	24227	23	24204	-0.122	0.209	0.885	0.559	0.018	0.209	1.018	0.932	8036	14	8022	NA	NA	NA	NA	NA	NA	NA	NA
Immunity deficiency	endocrine/metabolic	279.1	logistic	27107	218	26889	0.04	0.068	1.041	0.56	-0.04	0.068	0.961	0.559	9286	30	9256	-0.0325407	0.182877	0.967983	0.858772	0.279547	0.18685	1.32253	0.134627
Obstructive chronic bronchitis	respiratory	496.21	logistic	23096	173	22923	-0.044	0.076	0.957	0.56	0.01	0.076	1.01	0.895	7290	248	7042	-0.0714842	0.067507	0.931011	0.289639	-0.0759646	0.0683272	0.926849	0.266234
Ganglion and cyst of synovium, tendon, and bursa	musculoskeletal	727.4	logistic	23627	154	23473	-0.047	0.081	0.954	0.561	-0.072	0.081	0.93	0.374	6837	104	6733	-0.143577	0.10306	0.866254	0.163576	0.0253864	0.1057	1.02571	0.810196
Inflammation of eyelids	sense organs	371.3	logistic	26937	487	26450	-0.027	0.046	0.974	0.562	0.014	0.046	1.014	0.764	8681	175	8506	-0.0758547	0.0788111	0.926951	0.335804	0.155865	0.0810677	1.16867	0.0545236
Urinary incontinence	genitourinary	599.4	logistic	22925	672	22253	-0.023	0.04	0.977	0.562	-0.066	0.04	0.936	0.0948	7023	534	6489	0.0360051	0.0483362	1.03666	0.456339	0.0461539	0.048367	1.04724	0.33996
Hallux rigidus	musculoskeletal	735.23	logistic	26855	47	26808	0.085	0.146	1.088	0.563	-0.135	0.147	0.874	0.358	8971	19	8952	NA	NA	NA	NA	NA	NA	NA	NA
Sepsis and SIRS	injuries & poisonings	994	logistic	28226	1202	27024	0.017	0.03	1.017	0.563	0.008	0.03	1.009	0.774	9846	652	9194	0.0476982	0.0421227	1.04885	0.257482	-0.0520001	0.0426071	0.949329	0.222291
Liver replaced by transplant	digestive	573.2	logistic	24647	269	24378	0.035	0.061	1.036	0.564	0.016	0.061	1.016	0.793	8251	76	8175	-0.00678184	0.119745	0.993241	0.954836	0.0480308	0.122113	1.0492	0.694076
Other disorders of urethra and urinary tract	genitourinary	597	logistic	27004	194	26810	0.042	0.072	1.043	0.564	0.107	0.072	1.113	0.139	9414	89	9325	0.0288479	0.110675	1.02927	0.794359	-0.11709	0.110729	0.889506	0.290311
Otalgia	sense organs	382	logistic	27189	184	27005	0.043	0.074	1.044	0.565	0.026	0.074	1.027	0.724	9213	164	9049	0.142032	0.0829294	1.15261	0.0867708	-0.0822564	0.0835889	0.921036	0.325086
Prurigo and Lichen	dermatologic	695.7	logistic	24316	112	24204	-0.055	0.096	0.946	0.565	0.024	0.095	1.025	0.798	8106	84	8022	0.0490966	0.114318	1.05032	0.667579	0.0586899	0.115638	1.06045	0.611781
Vascular hamartomas and non-neoplastic nevi	neoplasms	217	logistic	19027	271	18756	0.035	0.062	1.036	0.566	0.072	0.061	1.075	0.235	4628	5	4623	NA	NA	NA	NA	NA	NA	NA	NA
Ectropion or entropion	sense organs	374.1	logistic	26510	60	26450	0.074	0.129	1.076	0.567	-0.041	0.129	0.96	0.751	8521	15	8506	NA	NA	NA	NA	NA	NA	NA	NA
Subjective visual disturbances	sense organs	368.9	logistic	27041	43	26998	0.087	0.153	1.091	0.568	0.001	0.153	1.001	0.995	8694	36	8658	0.322592	0.172601	1.3807	0.0616228	0.0380343	0.173529	1.03877	0.826508
Open wound of finger(s)	injuries & poisonings	871.2	logistic	27183	66	27117	-0.071	0.124	0.932	0.568	0.003	0.123	1.003	0.982	9098	55	9043	0.120532	0.139692	1.1281	0.388224	0.14274	0.138868	1.15343	0.304004
Breast cancer	neoplasms	174	logistic	25656	1173	24483	0.018	0.031	1.018	0.569	0.021	0.031	1.021	0.499	8604	393	8211	-0.0668507	0.0548451	0.935335	0.222882	0.0541748	0.0557386	1.05567	0.331079
Dysplasia of prostate	genitourinary	602.3	logistic	24040	83	23957	-0.063	0.111	0.939	0.57	0.107	0.112	1.113	0.34	8872	33	8839	-0.0321276	0.184389	0.968383	0.861678	-0.0560561	0.177199	0.945486	0.75174
Carbuncle and furuncle	dermatologic	686.1	logistic	25716	54	25662	0.078	0.137	1.081	0.57	0.246	0.136	1.279	0.0705	8132	100	8032	-0.0016077	0.105945	0.998394	0.987893	-0.00224887	0.10761	0.997754	0.983327
Myalgia and myositis unspecified	symptoms	770	logistic	27949	726	27223	-0.022	0.038	0.979	0.57	-0.031	0.038	0.97	0.416	9351	542	8809	-0.024057	0.0455186	0.97623	0.597145	0.0263469	0.0464519	1.0267	0.570588
Osteoarthritis; localized	musculoskeletal	740.1	logistic	25799	2075	23724	-0.013	0.023	0.987	0.571	-0.005	0.023	0.995	0.815	8678	1718	6960	-0.00262108	0.0299123	0.997382	0.930175	-0.0115559	0.030169	0.988511	0.701692
Acid-base balance disorder	endocrine/metabolic	276.4	logistic	21886	523	21363	-0.025	0.044	0.975	0.572	-0.038	0.044	0.963	0.389	6983	442	6541	-0.00512914	0.0517965	0.994884	0.921119	-0.0145714	0.0518842	0.985534	0.77883
Diseases of pancreas	digestive	577	logistic	28789	648	28141	-0.022	0.04	0.978	0.572	0.045	0.04	1.046	0.263	10136	251	9885	0.109835	0.0662283	1.11609	0.0972294	-0.00474897	0.0668037	0.995262	0.943327
Pilonidal cyst	dermatologic	686.3	logistic	25684	22	25662	-0.122	0.216	0.885	0.572	-0.269	0.214	0.764	0.209	8049	17	8032	NA	NA	NA	NA	NA	NA	NA	NA
Cellulitis and abscess of face/neck	dermatologic	681.2	logistic	25741	79	25662	-0.064	0.113	0.938	0.573	-0.066	0.113	0.936	0.559	8088	56	8032	0.0632189	0.14112	1.06526	0.654167	0.118797	0.142798	1.12614	0.405455
Pathologic fracture	musculoskeletal	743.2	logistic	25996	202	25794	-0.04	0.071	0.961	0.573	0.052	0.071	1.053	0.465	9274	43	9231	0.21614	0.156139	1.24128	0.166274	0.0147763	0.160265	1.01489	0.92654
Other hypertrophic and atrophic conditions of skin	dermatologic	701	logistic	27293	736	26557	-0.021	0.038	0.979	0.574	-0.012	0.037	0.988	0.745	9425	241	9184	-0.172054	0.0679034	0.841934	0.0112831	-0.0407979	0.0682334	0.960023	0.549895
Disorders of function of stomach	digestive	536	logistic	26447	354	26093	0.03	0.054	1.031	0.575	0.034	0.054	1.035	0.52	8640	217	8423	0.0639748	0.0709462	1.06607	0.367196	0.0651106	0.071209	1.06728	0.360528
Testicular hypofunction	endocrine/metabolic	257.1	logistic	26262	417	25845	0.028	0.05	1.028	0.576	0.038	0.049	1.039	0.438	8758	163	8595	-0.0821923	0.083237	0.921095	0.323422	-0.0681649	0.084077	0.934106	0.417513
Macular puckering of retina	sense organs	362.26	logistic	26503	115	26388	0.053	0.094	1.054	0.576	0.013	0.094	1.013	0.89	8281	48	8233	-0.14021	0.148375	0.869176	0.344676	-0.146938	0.148379	0.863347	0.322032
Impaction of intestine	digestive	560.2	logistic	20914	22	20892	-0.12	0.216	0.887	0.577	0.264	0.212	1.302	0.213	6489	14	6475	NA	NA	NA	NA	NA	NA	NA	NA
Glomerulonephritis	genitourinary	580.1	logistic	21579	142	21437	0.047	0.084	1.048	0.577	0.231	0.085	1.259	0.00641	6331	98	6233	0.0240604	0.106135	1.02435	0.820659	0.149517	0.108046	1.16127	0.16641
Inflammation of the eye	sense organs	371	logistic	27068	618	26450	-0.023	0.041	0.977	0.578	0.007	0.041	1.007	0.865	8845	339	8506	-0.0657552	0.0574692	0.93636	0.252548	0.145323	0.058723	1.15641	0.0133338
Abdominal aortic aneurysm	circulatory system	442.11	logistic	23387	490	22897	-0.026	0.047	0.974	0.578	0.016	0.046	1.016	0.727	8486	75	8411	0.0142372	0.116744	1.01434	0.902936	0.0204701	0.116664	1.02068	0.860717
Disorders of magnesium metabolism	endocrine/metabolic	275.3	logistic	25709	483	25226	0.026	0.046	1.026	0.579	0.031	0.046	1.032	0.5	8665	292	8373	-0.0584615	0.0621629	0.943215	0.346984	-0.0441932	0.0620528	0.956769	0.476349
Obsessive-compulsive disorders	mental disorders	300.3	logistic	19332	68	19264	0.068	0.122	1.07	0.579	-0.097	0.123	0.907	0.429	5748	14	5734	NA	NA	NA	NA	NA	NA	NA	NA
Mechanical complication of unspecified genitourinary device, implant, and graft	injuries & poisonings	857	logistic	24397	107	24290	0.054	0.097	1.056	0.579	0.035	0.097	1.036	0.719	8486	64	8422	0.254258	0.133317	1.2895	0.0564991	0.143627	0.13301	1.15445	0.28022
Acidosis	endocrine/metabolic	276.41	logistic	21647	284	21363	-0.033	0.06	0.968	0.58	-0.027	0.06	0.974	0.656	6852	311	6541	-0.0327693	0.0612536	0.967762	0.592665	0.0231562	0.0613196	1.02343	0.705705
Peritoneal adhesions (postoperative) (postinfection)	digestive	568.1	logistic	25878	43	25835	0.085	0.153	1.089	0.58	0.333	0.153	1.395	0.0293	8660	17	8643	NA	NA	NA	NA	NA	NA	NA	NA
Degeneration of intervertebral disc	musculoskeletal	722.6	logistic	25098	731	24367	-0.021	0.038	0.979	0.58	0.015	0.038	1.015	0.691	8524	515	8009	0.0375643	0.0475015	1.03828	0.429059	-0.0642789	0.047753	0.937743	0.17828
Disease of tricuspid valve	circulatory system	394.7	logistic	22330	367	21963	0.029	0.053	1.03	0.582	-0.135	0.053	0.873	0.0108	8489	121	8368	-0.057241	0.094667	0.944366	0.545407	0.0428155	0.0956814	1.04375	0.654529
Decreased libido	mental disorders	302.1	logistic	19340	76	19264	0.063	0.115	1.065	0.583	-0.078	0.115	0.925	0.499	5773	39	5734	-0.201162	0.171839	0.81778	0.241743	-0.0277039	0.169743	0.972676	0.870353
Rotator cuff (capsule) sprain	injuries & poisonings	840.2	logistic	26330	55	26275	0.075	0.136	1.078	0.583	0.178	0.134	1.195	0.186	7886	43	7843	0.216147	0.157908	1.24128	0.171056	0.00293038	0.159622	1.00293	0.985353
Other symptoms/disorders or the urinary system	genitourinary	599	logistic	25752	3499	22253	-0.01	0.018	0.99	0.584	-0.006	0.018	0.994	0.752	8770	2281	6489	0.00980059	0.0256876	1.00985	0.70281	-0.00514806	0.0258291	0.994865	0.842018
Cancer of other female genital organs (excluding uterus and ovary)	neoplasms	184.2	logistic	24733	36	24697	0.093	0.17	1.097	0.585	0.054	0.17	1.055	0.751	8357	25	8332	0.0629659	0.207896	1.06499	0.761988	-0.030729	0.212773	0.969738	0.885168
Adult failure to thrive	endocrine/metabolic	260.3	logistic	22776	96	22680	0.056	0.102	1.057	0.586	0.074	0.103	1.076	0.474	6968	49	6919	0.189043	0.149458	1.20809	0.205923	-0.0723648	0.149866	0.930192	0.629192
Malignant neoplasm of female breast	neoplasms	174.11	logistic	25610	1127	24483	0.017	0.032	1.018	0.588	0.032	0.032	1.033	0.314	8589	378	8211	-0.0814212	0.0557737	0.921805	0.144332	0.0770651	0.0567361	1.08011	0.174366
Multiple myeloma	neoplasms	204.4	logistic	27431	146	27285	-0.045	0.083	0.956	0.588	-0.023	0.083	0.977	0.781	9906	57	9849	-0.179935	0.135644	0.835325	0.184669	0.221648	0.136373	1.24813	0.104097
Cholelithiasis with other cholecystitis	digestive	574.12	logistic	27461	28	27433	-0.103	0.19	0.902	0.588	-0.159	0.19	0.853	0.401	9510	16	9494	NA	NA	NA	NA	NA	NA	NA	NA
Nonspecific chest pain	circulatory system	418	logistic	25910	3086	22824	-0.01	0.019	0.99	0.59	0.001	0.019	1.001	0.967	8705	2883	5822	0.0094878	0.0238913	1.00953	0.691276	0.0299687	0.0242019	1.03042	0.215613
Intestinal infection	infectious diseases	8	logistic	28293	356	27937	0.029	0.053	1.029	0.591	-0.062	0.053	0.94	0.248	9740	268	9472	0.130736	0.0642252	1.13967	0.0417917	0.0391383	0.0649266	1.03991	0.546636
Second degree AV block	circulatory system	426.23	logistic	15274	112	15162	-0.051	0.095	0.95	0.592	-0.035	0.095	0.965	0.709	5320	29	5291	0.20771	0.206422	1.23086	0.3143	0.204913	0.214756	1.22742	0.339999
Other headache syndromes	neurological	339	logistic	26497	645	25852	-0.021	0.04	0.979	0.594	0.083	0.04	1.086	0.0389	8712	604	8108	-0.0473406	0.043782	0.953762	0.279572	-0.0548144	0.0444556	0.946661	0.217571
Nonspecific abnormal findings on radiological and other examination of skull and head	neurological	346.1	logistic	25060	80	24980	-0.06	0.112	0.942	0.595	-0.159	0.113	0.853	0.16	8404	35	8369	0.339515	0.182013	1.40427	0.0621343	-0.43302	0.185851	0.648547	0.0198095
Poisoning by psychotropic agents	injuries & poisonings	969	logistic	22656	28	22628	0.1	0.189	1.106	0.595	-0.138	0.189	0.871	0.466	7605	44	7561	-0.200772	0.158925	0.818099	0.206476	0.202145	0.16202	1.22403	0.212157
Nontoxic nodular goiter	endocrine/metabolic	241	logistic	23576	1261	22315	-0.016	0.029	0.985	0.596	0.007	0.029	1.007	0.817	8878	671	8207	0.00417023	0.0424663	1.00418	0.921773	0.0113577	0.0429899	1.01142	0.791629
Conjunctivitis, infectious	sense organs	369.5	logistic	26563	113	26450	0.05	0.095	1.052	0.596	0.117	0.095	1.124	0.215	8598	92	8506	0.0671243	0.109227	1.06943	0.538861	0.229465	0.110677	1.25793	0.0381461
Other symptoms involving urinary system	genitourinary	599.8	logistic	22430	177	22253	-0.04	0.076	0.961	0.596	0.07	0.076	1.073	0.354	6560	71	6489	0.0892305	0.123702	1.09333	0.470705	0.0308888	0.124355	1.03137	0.803831
Nephrotic syndrome without mention of glomerulonephritis	genitourinary	580.2	logistic	21516	79	21437	0.06	0.113	1.062	0.597	0.141	0.113	1.152	0.21	6284	51	6233	0.101341	0.147108	1.10665	0.490893	0.135419	0.149599	1.14502	0.365354
Disorders of the pituitary gland and its hypothalamic control	endocrine/metabolic	253	logistic	26106	261	25845	0.033	0.062	1.033	0.601	0.123	0.062	1.131	0.0481	8705	110	8595	-0.0936996	0.100553	0.910556	0.351419	-0.191318	0.101779	0.82587	0.0601421
Testicular dysfunction	endocrine/metabolic	257	logistic	26263	418	25845	0.026	0.05	1.026	0.601	0.042	0.049	1.042	0.399	8758	163	8595	-0.0821923	0.083237	0.921095	0.323422	-0.0681649	0.084077	0.934106	0.417513
Hemorrhage in early pregnancy	pregnancy complications	636.3	logistic	28492	101	28391	0.053	0.102	1.054	0.602	0.116	0.101	1.123	0.251	9517	161	9356	0.0716533	0.0861135	1.07428	0.405364	0.187861	0.0871442	1.20667	0.0311033
Large cell lymphoma	neoplasms	202.24	logistic	27322	37	27285	-0.086	0.166	0.918	0.605	0.031	0.165	1.031	0.853	9851	2	9849	NA	NA	NA	NA	NA	NA	NA	NA
Fracture of radius and ulna	injuries & poisonings	803.2	logistic	27051	193	26858	-0.038	0.073	0.963	0.605	0.029	0.073	1.029	0.692	9164	84	9080	0.116944	0.113895	1.12406	0.304532	-0.100443	0.115347	0.904437	0.383867
Lipoma	neoplasms	214	logistic	28469	199	28270	-0.037	0.071	0.964	0.606	0.057	0.071	1.058	0.426	9850	170	9680	-0.00219199	0.0804626	0.99781	0.978266	0.101061	0.0817804	1.10634	0.216547
Secondary hypothyroidism	endocrine/metabolic	244.1	logistic	22659	344	22315	-0.028	0.055	0.972	0.606	0.02	0.054	1.02	0.713	8360	153	8207	-0.0685407	0.0848326	0.933755	0.419118	0.0212011	0.0859505	1.02143	0.805167
Dermatomycoses	infectious diseases	110.2	logistic	25707	34	25673	-0.089	0.172	0.915	0.607	0.023	0.171	1.024	0.891	7657	20	7637	-0.121603	0.230645	0.8855	0.598034	0.264107	0.233106	1.30227	0.257218
Excessive or frequent menstruation	genitourinary	626.12	logistic	25583	196	25387	0.038	0.073	1.038	0.608	-0.019	0.073	0.981	0.798	7779	359	7420	-0.00731879	0.0586827	0.992708	0.900747	-0.157731	0.0598592	0.854079	0.00841267
Eye infection, viral	sense organs	369.2	logistic	26486	36	26450	0.086	0.168	1.089	0.61	-0.015	0.168	0.985	0.929	8528	22	8506	-0.28403	0.220825	0.752744	0.198366	0.0621	0.226373	1.06407	0.783834
Stricture/obstruction of ureter	genitourinary	586.4	logistic	21612	175	21437	-0.039	0.076	0.962	0.61	0.025	0.076	1.025	0.741	6286	53	6233	0.120688	0.140497	1.12827	0.390336	-0.0695646	0.144015	0.9328	0.629069
Benign neoplasm of breast	genitourinary	610.4	logistic	26613	28	26585	0.097	0.191	1.102	0.61	-0.07	0.19	0.932	0.712	8432	19	8413	NA	NA	NA	NA	NA	NA	NA	NA
Herpes zoster with nervous system complications	infectious diseases	53.1	logistic	24773	54	24719	0.069	0.136	1.072	0.611	-0.054	0.137	0.948	0.694	7288	32	7256	0.135744	0.183379	1.14539	0.459157	-0.125283	0.187281	0.882247	0.503521
Pain in joint	musculoskeletal	745	logistic	26410	5066	21344	0.008	0.016	1.008	0.611	-0.001	0.016	0.999	0.944	8948	3932	5016	0.00951328	0.0228292	1.00956	0.676886	-0.0300764	0.0231623	0.970371	0.194114
Hypercholesterolemia	endocrine/metabolic	272.11	logistic	17060	2976	14084	-0.011	0.022	0.989	0.613	-0.015	0.022	0.985	0.491	6339	1149	5190	-0.0486654	0.0375209	0.9525	0.194624	0.06059	0.0383544	1.06246	0.114166
Lymphoid leukemia	neoplasms	204.1	logistic	27515	230	27285	0.033	0.066	1.034	0.615	-0.043	0.066	0.958	0.512	9875	26	9849	0.0687693	0.196118	1.07119	0.72585	-0.323497	0.199267	0.723614	0.104496
Retinal edema	sense organs	362.9	logistic	26445	57	26388	-0.067	0.133	0.935	0.615	-0.031	0.132	0.97	0.816	8315	82	8233	-0.0108434	0.116135	0.989215	0.925611	0.0175705	0.116873	1.01773	0.880498
Peritoneal or intestinal adhesions	digestive	560.3	logistic	20916	24	20892	0.104	0.206	1.109	0.615	-0.189	0.205	0.828	0.357	6486	11	6475	NA	NA	NA	NA	NA	NA	NA	NA
Cellulitis and abscess of leg, except foot	dermatologic	681.5	logistic	25976	314	25662	-0.029	0.057	0.972	0.616	-0.039	0.057	0.962	0.495	8218	186	8032	-0.0166279	0.0763497	0.98351	0.827596	0.15246	0.0772197	1.1647	0.0483399
Acute pericarditis	circulatory system	420.21	logistic	24563	31	24532	-0.09	0.181	0.914	0.617	0.236	0.18	1.266	0.191	8647	15	8632	NA	NA	NA	NA	NA	NA	NA	NA
Anemia during pregnancy	pregnancy complications	644	logistic	28964	78	28886	-0.057	0.115	0.944	0.617	0.064	0.115	1.066	0.58	9985	307	9678	-0.0363008	0.0648977	0.96435	0.575919	0.00871239	0.066434	1.00875	0.895662
Abnormal heart sounds	circulatory system	396	logistic	22199	236	21963	-0.033	0.066	0.968	0.618	0.003	0.066	1.003	0.97	8554	186	8368	-0.147481	0.0768136	0.862879	0.0548591	0.0836544	0.0785353	1.08725	0.286793
Cancer of bladder	neoplasms	189.2	logistic	28348	613	27735	-0.021	0.041	0.98	0.619	0.021	0.041	1.021	0.612	10039	93	9946	-0.0702984	0.107291	0.932116	0.512331	0.0510175	0.109115	1.05234	0.640102
Chemotherapy	neoplasms	197	logistic	24387	960	23427	-0.016	0.033	0.984	0.619	-0.025	0.033	0.976	0.456	9184	258	8926	-0.0139971	0.0648468	0.9861	0.829106	-0.0096978	0.0659658	0.990349	0.883122
Acute posthemorrhagic anemia	hematopoietic	285.1	logistic	20302	221	20081	0.034	0.068	1.034	0.619	-0.053	0.068	0.948	0.433	5364	163	5201	0.0725888	0.0841994	1.07529	0.388629	0.0492494	0.08556	1.05048	0.564877
Other biliary tract disease	digestive	575	logistic	27823	390	27433	-0.025	0.051	0.975	0.621	0.01	0.051	1.01	0.848	9624	130	9494	0.108742	0.0907224	1.11487	0.230676	0.135293	0.091453	1.14487	0.139041
Osteoporosis, osteopenia and pathological fracture	musculoskeletal	743	logistic	27745	1951	25794	-0.012	0.025	0.988	0.623	0.006	0.025	1.006	0.796	9767	536	9231	-0.0167378	0.0469322	0.983401	0.721363	0.0764578	0.0477682	1.07946	0.109466
Lipoma of skin and subcutaneous tissue	neoplasms	214.1	logistic	28359	89	28270	0.052	0.107	1.054	0.624	-0.031	0.107	0.969	0.77	9770	90	9680	-0.0354604	0.110735	0.965161	0.748797	0.12988	0.112008	1.13869	0.246229
Eosinophilic esophagitis	digestive	530.15	logistic	18526	35	18491	0.083	0.169	1.086	0.625	0.165	0.168	1.179	0.328	5725	2	5723	NA	NA	NA	NA	NA	NA	NA	NA
Other congenital anomalies of lower limb, including pelvic girdle	congenital anomalies	755.6	logistic	28513	20	28493	0.111	0.226	1.117	0.625	-0.109	0.226	0.896	0.629	9993	4	9989	NA	NA	NA	NA	NA	NA	NA	NA
Benign neoplasm of adrenal gland	neoplasms	227.1	logistic	27809	96	27713	-0.05	0.103	0.951	0.627	0.012	0.102	1.012	0.907	9945	53	9892	0.0190331	0.139177	1.01922	0.891225	0.0273568	0.141358	1.02773	0.846545
Hyperaldosteronism	endocrine/metabolic	255.12	logistic	25899	54	25845	-0.066	0.136	0.936	0.629	0.027	0.136	1.028	0.842	8654	59	8595	0.0822522	0.135023	1.08573	0.54241	-0.303013	0.136196	0.738589	0.0260927
Other immunological findings	endocrine/metabolic	279.7	logistic	27247	358	26889	0.026	0.053	1.026	0.629	-0.038	0.053	0.963	0.476	9526	270	9256	-0.0622565	0.0640182	0.939642	0.330811	-0.0139698	0.0646437	0.986127	0.828906
Von willebrand's disease	hematopoietic	286.11	logistic	20770	29	20741	0.09	0.187	1.094	0.631	0.08	0.187	1.084	0.668	7976	3	7973	NA	NA	NA	NA	NA	NA	NA	NA
Corneal dystrophy	sense organs	364.5	logistic	26740	35	26705	0.082	0.171	1.085	0.631	-0.046	0.17	0.955	0.785	8549	15	8534	NA	NA	NA	NA	NA	NA	NA	NA
Cancer within the respiratory system	neoplasms	165	logistic	28898	764	28134	-0.018	0.037	0.982	0.632	0.006	0.037	1.006	0.877	10236	198	10038	-0.12993	0.0744167	0.878157	0.0808145	-0.0486088	0.0754336	0.952554	0.519321
Other benign neoplasm of connective and other soft tissue	neoplasms	215	logistic	28380	110	28270	0.046	0.096	1.047	0.632	-0.091	0.096	0.913	0.342	9763	83	9680	0.107097	0.115482	1.11304	0.353723	-0.158383	0.116459	0.853523	0.173836
Abnormal glucose	endocrine/metabolic	250.4	logistic	22178	1719	20459	-0.012	0.025	0.988	0.632	0.003	0.025	1.003	0.92	6752	1283	5469	-0.0348756	0.0327544	0.965726	0.286984	-0.0580963	0.0330193	0.943559	0.0784984
Dislocation	injuries & poisonings	830	logistic	28307	302	28005	-0.028	0.058	0.973	0.632	-0.095	0.058	0.91	0.101	9760	143	9617	0.04071	0.0869545	1.04155	0.639658	-0.024846	0.0878997	0.97546	0.777435
Malignant neoplasm of other urinary organs	neoplasms	189.4	logistic	27876	141	27735	-0.04	0.085	0.96	0.633	0.059	0.085	1.06	0.491	9962	16	9946	NA	NA	NA	NA	NA	NA	NA	NA
Benign neoplasm of bone and articular cartilage	neoplasms	213	logistic	17332	31	17301	0.086	0.181	1.09	0.633	0.202	0.178	1.224	0.258	4093	15	4078	NA	NA	NA	NA	NA	NA	NA	NA
Allergic reaction to food	injuries & poisonings	930	logistic	23575	178	23397	-0.036	0.076	0.965	0.633	-0.059	0.076	0.943	0.435	7605	192	7413	-0.0892869	0.0768439	0.914583	0.245266	0.0746985	0.0787541	1.07756	0.342874
Symptoms involving cardiovascular system	circulatory system	429.3	logistic	21514	448	21066	-0.023	0.049	0.977	0.634	0.08	0.048	1.084	0.0965	7691	174	7517	-0.124536	0.0800567	0.882907	0.119805	0.0385027	0.0800982	1.03925	0.630734
Disorders of esophageal motility	digestive	530.5	logistic	18600	109	18491	0.046	0.097	1.047	0.634	-0.011	0.096	0.989	0.91	5768	45	5723	-0.0763362	0.153278	0.926505	0.618466	-0.117112	0.155428	0.889485	0.451161
Vitamin B-complex deficiencies	endocrine/metabolic	261.2	logistic	22975	295	22680	-0.028	0.059	0.973	0.637	0.046	0.059	1.047	0.434	7130	211	6919	0.0339115	0.0723757	1.03449	0.639392	-0.00459196	0.0735225	0.995419	0.950199
Fracture of foot	injuries & poisonings	801.1	logistic	26910	52	26858	0.066	0.139	1.068	0.637	0.176	0.139	1.192	0.206	9134	54	9080	0.138944	0.14197	1.14906	0.327735	0.208503	0.144026	1.23183	0.147708
Hypoparathyroidism	endocrine/metabolic	252.2	logistic	25917	72	25845	0.056	0.119	1.057	0.639	0.148	0.119	1.159	0.213	8607	12	8595	NA	NA	NA	NA	NA	NA	NA	NA
Paroxysmal supraventricular tachycardia	circulatory system	427.11	logistic	15902	740	15162	-0.018	0.038	0.982	0.639	-0.016	0.038	0.984	0.665	5542	251	5291	0.137261	0.0669111	1.14713	0.0402287	0.100834	0.0683012	1.10609	0.139858
Reticulosarcoma	neoplasms	202.22	logistic	27442	157	27285	0.037	0.08	1.038	0.641	0.115	0.08	1.122	0.151	9867	18	9849	NA	NA	NA	NA	NA	NA	NA	NA
Vitamin D deficiency	endocrine/metabolic	261.4	logistic	24528	1848	22680	-0.011	0.024	0.989	0.642	0.01	0.024	1.01	0.672	8196	1277	6919	-0.0680094	0.0321558	0.934252	0.0344306	-0.0261712	0.0325821	0.974168	0.421837
Other intestinal obstruction	digestive	560.4	logistic	21264	372	20892	-0.024	0.053	0.976	0.643	0.057	0.052	1.059	0.274	6607	132	6475	0.0895159	0.0910981	1.09364	0.325788	-0.0339791	0.0924011	0.966592	0.713071
Abnormal function study of cardiovascular system	circulatory system	429.2	logistic	21461	395	21066	-0.024	0.051	0.977	0.646	-0.039	0.051	0.962	0.45	7665	148	7517	-0.00361039	0.0867897	0.996396	0.966818	0.0394929	0.0876342	1.04028	0.652238
Disorders of lipoid metabolism	endocrine/metabolic	272	logistic	25202	11118	14084	0.007	0.014	1.007	0.647	-0.01	0.014	0.99	0.464	9202	4012	5190	0.010314	0.0251302	1.01037	0.681495	0.0248797	0.0254019	1.02519	0.327362
Contusion	injuries & poisonings	916	logistic	28129	459	27670	0.022	0.047	1.022	0.647	0.011	0.047	1.011	0.816	9413	434	8979	0.0289225	0.0508295	1.02934	0.569349	0.0326061	0.0518934	1.03314	0.529789
Malignant neoplasm of head, face, and neck	neoplasms	195.3	logistic	28940	175	28765	0.035	0.076	1.035	0.648	0.012	0.076	1.012	0.874	10271	14	10257	NA	NA	NA	NA	NA	NA	NA	NA
Symptoms involving digestive system	digestive	561	logistic	22706	1814	20892	0.011	0.025	1.011	0.648	0.029	0.025	1.029	0.242	7305	830	6475	0.0999314	0.0381312	1.1051	0.00877428	-0.055172	0.0388119	0.946322	0.155165
Acquired hemolytic anemias	hematopoietic	283	logistic	20132	51	20081	0.064	0.141	1.066	0.65	-0.081	0.141	0.922	0.565	5219	18	5201	NA	NA	NA	NA	NA	NA	NA	NA
Wheezing	respiratory	512.1	logistic	17824	171	17653	0.035	0.077	1.036	0.65	0.011	0.077	1.011	0.89	4608	184	4424	0.00580674	0.0778966	1.00582	0.940577	-0.0817665	0.0797079	0.921487	0.304974
Hyperlipidemia	endocrine/metabolic	272.1	logistic	25173	11089	14084	0.006	0.014	1.006	0.651	-0.011	0.014	0.989	0.457	9184	3994	5190	0.0107167	0.0251526	1.01077	0.67006	0.0255	0.0254291	1.02583	0.315965
Hereditary and idiopathic peripheral neuropathy	neurological	356	logistic	27413	331	27082	-0.025	0.055	0.975	0.651	0.029	0.055	1.03	0.594	9427	116	9311	-0.00599508	0.0974616	0.994023	0.950951	0.0777692	0.0990007	1.08087	0.432136
Chronic tonsillitis and adenoiditis	respiratory	474.2	logistic	21897	114	21783	-0.043	0.095	0.958	0.652	0.091	0.093	1.095	0.329	6235	74	6161	0.0114714	0.121218	1.01154	0.924605	-0.119504	0.124318	0.88736	0.336413
Diseases of esophagus	digestive	530	logistic	24111	5620	18491	0.007	0.015	1.007	0.652	-0.018	0.015	0.982	0.231	8435	2712	5723	0.0163526	0.0248624	1.01649	0.510715	-0.0173655	0.0252054	0.982784	0.49085
Hemorrhage during pregnancy; childbirth and postpartum	pregnancy complications	635	logistic	28497	106	28391	0.045	0.1	1.046	0.652	0.173	0.099	1.189	0.0786	9497	141	9356	0.151556	0.0931601	1.16364	0.103771	-0.0763809	0.0950438	0.926463	0.421605
Gastritis and duodenitis	digestive	535	logistic	26542	449	26093	-0.021	0.048	0.979	0.653	0.072	0.048	1.074	0.132	8881	458	8423	0.0623424	0.0500786	1.06433	0.213172	-0.0109458	0.0502631	0.989114	0.827608
Intestinal infection due to C. difficile	infectious diseases	8.52	logistic	28127	190	27937	-0.033	0.073	0.968	0.654	-0.114	0.073	0.892	0.117	9561	89	9472	0.224897	0.108852	1.25219	0.0388209	-0.0470804	0.110136	0.954011	0.669032
Ventricular fibrillation and flutter	circulatory system	427.41	logistic	15256	94	15162	-0.046	0.103	0.955	0.656	0.027	0.103	1.027	0.793	5330	39	5291	0.0255502	0.162111	1.02588	0.874765	-0.174793	0.164618	0.839631	0.288323
Abnormal serum enzyme levels	digestive	573.9	logistic	24756	378	24378	-0.023	0.052	0.977	0.656	0.042	0.052	1.043	0.422	8405	230	8175	0.0561896	0.0689952	1.0578	0.415417	-0.0589435	0.0699781	0.94276	0.399612
Cancer of of nasal cavities	neoplasms	149.9	logistic	28377	40	28337	0.07	0.159	1.073	0.657	0.131	0.159	1.14	0.408	10175	8	10167	NA	NA	NA	NA	NA	NA	NA	NA
Leukemia	neoplasms	204	logistic	27792	507	27285	0.02	0.045	1.02	0.658	-0.037	0.045	0.964	0.415	9955	106	9849	-0.11322	0.100517	0.892954	0.26001	0.0188869	0.100056	1.01907	0.850278
Epilepsy	neurological	345.1	logistic	25385	405	24980	0.022	0.05	1.023	0.658	-0.023	0.05	0.977	0.645	8546	177	8369	-0.0714853	0.0776449	0.93101	0.357223	0.071509	0.0787325	1.07413	0.363745
Cancer of eye	neoplasms	190	logistic	28272	20	28252	-0.099	0.223	0.906	0.659	-0.297	0.223	0.743	0.183	10113	2	10111	NA	NA	NA	NA	NA	NA	NA	NA
Chronic bronchitis	respiratory	496.2	logistic	23267	344	22923	-0.024	0.054	0.976	0.659	-0.04	0.054	0.961	0.463	7363	321	7042	-0.0466605	0.0592549	0.954411	0.431016	-0.0741986	0.0601815	0.928487	0.217608
Acute bronchitis and bronchiolitis	respiratory	483	logistic	25327	411	24916	0.022	0.05	1.022	0.661	0.101	0.05	1.106	0.0427	8108	178	7930	0.0811224	0.077554	1.0845	0.295556	0.0655948	0.0786575	1.06779	0.404321
Diverticulosis and diverticulitis	digestive	562	logistic	21930	1038	20892	-0.014	0.032	0.986	0.661	0.001	0.032	1.001	0.986	6961	486	6475	0.0321964	0.0496141	1.03272	0.51638	0.0284884	0.0508557	1.0289	0.575355
Encephalitis, non-infectious	neurological	323.8	logistic	28702	24	28678	0.09	0.205	1.094	0.662	0.079	0.204	1.082	0.699	10011	8	10003	NA	NA	NA	NA	NA	NA	NA	NA
Infectious mononucleosis	infectious diseases	79.2	logistic	24744	25	24719	0.087	0.199	1.091	0.663	0.149	0.2	1.161	0.456	7257	1	7256	NA	NA	NA	NA	NA	NA	NA	NA
Secondary malignancy of respiratory organs	neoplasms	198.2	logistic	23718	291	23427	-0.026	0.059	0.975	0.663	0.016	0.059	1.016	0.792	8994	68	8926	-0.0699123	0.126007	0.932476	0.579012	-0.0558277	0.127809	0.945702	0.662251
Celiac disease	digestive	557.1	logistic	20999	107	20892	-0.043	0.098	0.958	0.663	-0.011	0.097	0.989	0.91	6489	14	6475	NA	NA	NA	NA	NA	NA	NA	NA
Skull and face fracture and other intercranial injury	injuries & poisonings	819	logistic	28617	180	28437	-0.033	0.075	0.968	0.663	0.075	0.075	1.078	0.317	9987	98	9889	0.182939	0.104587	1.20074	0.0802648	-0.155596	0.105682	0.855905	0.140938
Postmenopausal atrophic vaginitis	genitourinary	627.3	logistic	25614	227	25387	0.03	0.068	1.03	0.664	0.083	0.069	1.087	0.225	7477	57	7420	-0.00829893	0.13671	0.991735	0.951594	0.273623	0.143585	1.31472	0.0566958
Dyspepsia and other specified disorders of function of stomach	digestive	536.8	logistic	26213	120	26093	-0.04	0.092	0.961	0.665	0.049	0.091	1.051	0.589	8498	75	8423	0.139644	0.120266	1.14986	0.24559	0.00204534	0.120942	1.00205	0.986507
Chronic liver disease and cirrhosis	digestive	571	logistic	25712	1334	24378	-0.012	0.028	0.988	0.665	0.001	0.028	1.001	0.959	8722	547	8175	0.0242781	0.0457605	1.02458	0.595733	0.00875673	0.0464049	1.0088	0.850326
Disorders of sacrum	musculoskeletal	724.1	logistic	24408	41	24367	-0.069	0.158	0.934	0.665	-0.174	0.157	0.84	0.267	8033	24	8009	-0.0642297	0.208852	0.93779	0.758434	0.240644	0.21003	1.27207	0.251893
Thyroiditis	endocrine/metabolic	245	logistic	22602	287	22315	0.026	0.06	1.026	0.666	-0.035	0.06	0.966	0.562	8259	52	8207	-0.0591534	0.143761	0.942562	0.680728	0.154736	0.14529	1.16735	0.286868
Other disorders of intestine	digestive	569	logistic	26368	533	25835	0.019	0.044	1.019	0.667	-0.018	0.044	0.982	0.679	8838	195	8643	-0.128024	0.0742045	0.879833	0.0844767	0.0308312	0.0755715	1.03131	0.683293
Abdominal pain	symptoms	785	logistic	26415	4133	22282	-0.007	0.017	0.993	0.667	0.014	0.017	1.014	0.422	8760	3332	5428	-0.0351195	0.0232728	0.96549	0.131289	-0.0239785	0.0236027	0.976307	0.309666
Sensorineural hearing loss	sense organs	389.1	logistic	26887	1217	25670	0.013	0.03	1.013	0.668	0.04	0.03	1.041	0.173	9387	339	9048	-0.0475104	0.0580616	0.953601	0.4132	0.00565206	0.0584626	1.00567	0.922982
Influenza	respiratory	481	logistic	25069	153	24916	0.035	0.081	1.036	0.668	-0.022	0.081	0.978	0.784	8136	206	7930	0.0220829	0.0724079	1.02233	0.760382	-0.00487371	0.0739411	0.995138	0.947447
Secondary malignant neoplasm	neoplasms	198	logistic	25052	1625	23427	0.011	0.026	1.011	0.669	0	0.026	1	0.987	9258	332	8926	-0.0429753	0.0581651	0.957935	0.459998	0.0225511	0.0588862	1.02281	0.701749
Cataplexy and narcolepsy	neurological	347	logistic	25011	31	24980	0.077	0.18	1.08	0.669	-0.032	0.181	0.968	0.859	8391	22	8369	-0.398726	0.215957	0.671175	0.0648459	-0.0563446	0.222471	0.945213	0.800062
Diverticulum of esophagus, acquired	digestive	530.6	logistic	18519	28	18491	0.081	0.19	1.085	0.669	0.158	0.192	1.172	0.409	5731	8	5723	NA	NA	NA	NA	NA	NA	NA	NA
Unspecified erythematous condition	dermatologic	695.9	logistic	24233	29	24204	-0.08	0.188	0.923	0.669	0.324	0.185	1.382	0.081	8033	11	8022	NA	NA	NA	NA	NA	NA	NA	NA
Cerebral aneurysm	circulatory system	433.5	logistic	24869	238	24631	-0.028	0.066	0.972	0.671	0.078	0.066	1.081	0.234	8750	102	8648	0.0570352	0.104086	1.05869	0.583719	-0.0255789	0.104637	0.974746	0.806879
Other chronic nonalcoholic liver disease	digestive	571.5	logistic	25539	1161	24378	-0.013	0.03	0.987	0.672	-0.015	0.03	0.985	0.619	8676	501	8175	0.0239899	0.0476479	1.02428	0.614625	-0.00672908	0.048387	0.993294	0.889397
Hepatomegaly	digestive	573.3	logistic	24469	91	24378	-0.045	0.106	0.956	0.672	0.04	0.105	1.041	0.702	8216	41	8175	-0.0256088	0.163674	0.974716	0.875668	0.0990512	0.165358	1.10412	0.549165
Anal and rectal polyp	digestive	565.1	logistic	25865	30	25835	-0.077	0.183	0.926	0.673	-0.08	0.183	0.923	0.661	8664	21	8643	-0.390119	0.231958	0.676976	0.0925968	0.362173	0.234962	1.43645	0.123218
Atherosclerosis	circulatory system	440	logistic	23641	744	22897	-0.016	0.038	0.984	0.674	-0.05	0.038	0.951	0.181	8713	302	8411	-0.0436175	0.0609862	0.95732	0.474483	0.00859149	0.0618749	1.00863	0.889567
Colon cancer	neoplasms	153.2	logistic	24588	464	24124	-0.02	0.047	0.981	0.675	-0.019	0.047	0.981	0.687	8052	123	7929	0.0378707	0.0922701	1.0386	0.681488	-0.225463	0.0938261	0.798147	0.0162617
Intestinal obstruction without mention of hernia	digestive	560	logistic	21427	535	20892	-0.018	0.044	0.982	0.675	0.083	0.044	1.087	0.0556	6700	225	6475	0.103672	0.0698383	1.10924	0.137686	0.00188817	0.0704763	1.00189	0.978626
Personal history of diseases of blood and blood-forming organs	hematopoietic	289.3	logistic	23994	28	23966	0.079	0.19	1.083	0.677	-0.098	0.19	0.907	0.607	7995	31	7964	0.0747091	0.190959	1.07757	0.695626	0.0155335	0.193103	1.01565	0.935886
Other nutritional deficiency	endocrine/metabolic	263	logistic	22763	83	22680	-0.046	0.111	0.955	0.678	-0.032	0.11	0.969	0.771	6966	47	6919	-0.24506	0.153861	0.782657	0.111218	0.180494	0.157824	1.19781	0.252773
Functional disorders of bladder	genitourinary	596.5	logistic	27091	281	26810	-0.025	0.06	0.975	0.68	0.036	0.06	1.037	0.548	9499	174	9325	-0.070507	0.078675	0.931921	0.370156	-0.0782511	0.07948	0.924732	0.324851
Pancytopenia	hematopoietic	284.1	logistic	20340	259	20081	0.026	0.063	1.026	0.681	0.005	0.063	1.005	0.939	5284	83	5201	-0.0574744	0.114402	0.944146	0.615393	-0.156309	0.115023	0.855295	0.174165
Duodenal ulcer	digestive	531.3	logistic	28292	52	28240	-0.057	0.139	0.944	0.682	0.027	0.139	1.028	0.844	9833	26	9807	0.293797	0.20111	1.34151	0.14405	0.18725	0.206867	1.20593	0.365374
Adverse drug events and drug allergies	injuries & poisonings	979	logistic	22917	289	22628	-0.024	0.06	0.976	0.682	-0.036	0.059	0.965	0.546	7779	218	7561	-0.0490091	0.0708932	0.952172	0.489371	0.0458686	0.0725536	1.04694	0.527254
Postnasal drip	respiratory	475.9	logistic	21955	172	21783	-0.031	0.077	0.969	0.683	0.019	0.076	1.02	0.8	6237	76	6161	-0.0245019	0.119063	0.975796	0.836955	-0.0179839	0.123016	0.982177	0.88377
Ectopic pregnancy	pregnancy complications	634.3	logistic	28414	23	28391	-0.086	0.211	0.917	0.683	0.01	0.21	1.01	0.963	9410	54	9356	0.0710393	0.142791	1.07362	0.618833	0.168398	0.143028	1.18341	0.239046
Cellulitis and abscess of trunk	dermatologic	681.7	logistic	25870	208	25662	0.029	0.07	1.029	0.683	0.061	0.07	1.063	0.384	8204	172	8032	0.0770423	0.0807807	1.08009	0.340224	-0.0831317	0.0817236	0.92023	0.309044
Premature beats	circulatory system	427.6	logistic	16491	1329	15162	-0.012	0.029	0.988	0.684	-0.011	0.029	0.99	0.715	5592	301	5291	0.0496425	0.0604985	1.0509	0.411898	0.0415172	0.0614773	1.04239	0.499468
Alopecia Areata	dermatologic	704.11	logistic	27137	21	27116	-0.09	0.22	0.914	0.684	0.044	0.219	1.045	0.839	9023	10	9013	NA	NA	NA	NA	NA	NA	NA	NA
Vascular insufficiency of intestine	circulatory system	441	logistic	22972	75	22897	0.047	0.116	1.048	0.685	-0.061	0.116	0.94	0.596	8442	31	8411	-0.22929	0.18786	0.795098	0.222263	-0.190973	0.188408	0.826155	0.310769
Anorexia	endocrine/metabolic	260.6	logistic	22761	81	22680	-0.045	0.112	0.956	0.686	-0.179	0.111	0.836	0.108	7007	88	6919	0.0454542	0.111787	1.0465	0.684291	0.113976	0.114151	1.12073	0.318052
Symptoms and disorders of the joints	musculoskeletal	741	logistic	27410	594	26816	-0.017	0.042	0.983	0.686	0.038	0.042	1.039	0.36	8986	587	8399	0.0177159	0.0445708	1.01787	0.691015	0.0339551	0.045379	1.03454	0.454306
Chondrocalcinosis	endocrine/metabolic	274.21	logistic	27278	22	27256	-0.087	0.216	0.917	0.687	0.39	0.216	1.476	0.0712	9357	30	9327	0.284275	0.186821	1.3288	0.128099	0.133741	0.191813	1.1431	0.485649
Other disorders of metabolism	endocrine/metabolic	277	logistic	27694	466	27228	-0.019	0.047	0.981	0.688	-0.063	0.047	0.939	0.176	9601	163	9438	-0.0728282	0.0819005	0.929761	0.373881	0.118072	0.0831441	1.12533	0.155581
Symptoms involving head and neck	mental disorders	293	logistic	28101	323	27778	-0.022	0.056	0.978	0.688	-0.033	0.056	0.967	0.55	9385	166	9219	0.0513242	0.080728	1.05266	0.524928	-0.0272015	0.0821407	0.973165	0.740526
Tuberculosis	infectious diseases	10	logistic	25277	29	25248	0.075	0.187	1.078	0.689	0.123	0.186	1.131	0.507	8201	42	8159	0.173499	0.166789	1.18946	0.298232	-0.149483	0.170247	0.861153	0.379923
Aneurysm and dissection of heart	circulatory system	411.41	logistic	20297	50	20247	0.057	0.142	1.058	0.69	0.022	0.142	1.022	0.879	7718	6	7712	NA	NA	NA	NA	NA	NA	NA	NA
Noninflammatory disorders of ovary, fallopian tube, and broad ligament	genitourinary	619.1	logistic	27658	61	27597	-0.052	0.129	0.95	0.69	-0.276	0.131	0.759	0.035	8515	38	8477	0.031368	0.168163	1.03187	0.852027	-0.143584	0.17196	0.866248	0.403725
Infertility, male	genitourinary	609.1	logistic	23844	63	23781	-0.05	0.126	0.951	0.691	-0.155	0.126	0.856	0.22	8436	19	8417	NA	NA	NA	NA	NA	NA	NA	NA
Congenital anomalies of great vessels	congenital anomalies	747.13	logistic	27214	132	27082	0.035	0.087	1.035	0.691	-0.033	0.088	0.967	0.704	9903	26	9877	-0.0762553	0.200384	0.92658	0.70354	0.0764503	0.204132	1.07945	0.708022
Raynaud's syndrome	circulatory system	443.1	logistic	23111	214	22897	-0.027	0.069	0.973	0.692	0.038	0.069	1.039	0.584	8464	53	8411	0.0245198	0.143187	1.02482	0.864033	0.160986	0.144428	1.17467	0.265004
Abnormality of red blood cells	hematopoietic	289.9	logistic	23989	23	23966	0.082	0.209	1.086	0.693	-0.123	0.21	0.885	0.559	7983	19	7964	NA	NA	NA	NA	NA	NA	NA	NA
Pneumococcal pneumonia	respiratory	480.11	logistic	24972	56	24916	-0.053	0.134	0.948	0.693	-0.176	0.135	0.839	0.191	7955	25	7930	0.129599	0.210644	1.13837	0.53839	0.236358	0.218259	1.26663	0.278843
Eosinophilia	hematopoietic	288.3	logistic	24021	55	23966	0.053	0.135	1.054	0.694	0.076	0.135	1.079	0.572	7985	21	7964	0.423256	0.221398	1.52693	0.055909	-0.0917393	0.22463	0.912343	0.682978
Strabismus (not specified as paralytic)	sense organs	378.1	logistic	26527	95	26432	0.04	0.104	1.041	0.696	0.08	0.103	1.083	0.438	8358	35	8323	0.0998659	0.17111	1.10502	0.559466	-0.100422	0.174332	0.904456	0.564589
Alzheimer's disease	mental disorders	290.11	logistic	25456	51	25405	-0.055	0.142	0.946	0.697	-0.006	0.14	0.994	0.968	8390	20	8370	0.134801	0.252074	1.14431	0.592812	-0.213634	0.245562	0.807644	0.384311
Disorders of penis	genitourinary	604	logistic	23884	103	23781	0.038	0.098	1.039	0.697	0.075	0.099	1.078	0.445	8489	72	8417	0.201241	0.130597	1.22292	0.123332	-0.166929	0.129331	0.846259	0.196804
Pituitary hyperfunction	endocrine/metabolic	253.1	logistic	25906	61	25845	0.05	0.129	1.051	0.699	0.075	0.129	1.077	0.563	8638	43	8595	0.0497989	0.161724	1.05106	0.758139	-0.440955	0.162472	0.643422	0.00664677
severe protein-calorie malnutrition	endocrine/metabolic	260.2	logistic	22876	196	22680	-0.028	0.072	0.973	0.699	-0.006	0.072	0.994	0.934	7027	108	6919	0.0445365	0.0985882	1.04554	0.651454	0.139394	0.100869	1.14958	0.166994
Rickets or osteomalacia	endocrine/metabolic	261.41	logistic	22745	65	22680	0.048	0.124	1.049	0.699	-0.008	0.125	0.992	0.949	6956	37	6919	0.132542	0.173889	1.14173	0.445927	-0.0180065	0.175451	0.982155	0.918257
Squamous cell carcinoma	neoplasms	172.22	logistic	24345	502	23843	0.017	0.045	1.018	0.701	0.025	0.045	1.025	0.584	9709	12	9697	NA	NA	NA	NA	NA	NA	NA	NA
Hypocalcemia	endocrine/metabolic	275.51	logistic	25455	229	25226	0.026	0.067	1.026	0.701	0.006	0.067	1.006	0.934	8462	89	8373	0.129048	0.111901	1.13774	0.248814	-0.0495738	0.111962	0.951635	0.657929
Ulcerative colitis (chronic)	digestive	555.21	logistic	21038	146	20892	0.032	0.084	1.033	0.701	-0.018	0.083	0.982	0.83	6500	25	6475	-0.0593743	0.207395	0.942354	0.774658	0.0408752	0.213961	1.04172	0.848494
Opiates and related narcotics causing adverse effects in therapeutic use	injuries & poisonings	965.1	logistic	22752	124	22628	-0.035	0.091	0.966	0.701	0.064	0.09	1.066	0.479	7652	91	7561	0.00209633	0.109692	1.0021	0.984753	0.0998241	0.111391	1.10498	0.370166
Symptoms involving nervous and musculoskeletal systems	symptoms	781	logistic	28396	223	28173	-0.026	0.068	0.975	0.703	0.172	0.068	1.188	0.0109	9672	173	9499	-0.0520531	0.0802831	0.949278	0.516746	0.0238144	0.081415	1.0241	0.769899
Atopic/contact dermatitis due to other or unspecified	dermatologic	939	logistic	24356	959	23397	-0.013	0.033	0.987	0.703	0.067	0.033	1.069	0.0425	7975	562	7413	-0.0254098	0.045604	0.97491	0.577402	0.0585943	0.0463534	1.06035	0.206202
Kyphoscoliosis and scoliosis	musculoskeletal	737.3	logistic	26987	179	26808	-0.028	0.075	0.972	0.707	-0.03	0.076	0.971	0.694	9016	64	8952	-0.315053	0.124517	0.72975	0.0113996	0.109407	0.126404	1.11562	0.386745
Abnormal reflex	neurological	350.5	logistic	26081	49	26032	0.054	0.144	1.055	0.708	-0.027	0.143	0.974	0.852	8648	18	8630	NA	NA	NA	NA	NA	NA	NA	NA
Open wound of hand except finger(s)	injuries & poisonings	871.1	logistic	27144	27	27117	-0.072	0.192	0.931	0.708	-0.227	0.193	0.797	0.239	9065	22	9043	-0.284154	0.217759	0.75265	0.191926	-0.0732722	0.219885	0.929348	0.738961
Shortness of breath	respiratory	512.7	logistic	20926	3273	17653	-0.007	0.019	0.993	0.709	-0.019	0.019	0.981	0.329	6582	2158	4424	0.0489313	0.0281343	1.05015	0.0819981	-0.00961865	0.0286982	0.990427	0.7375
HIV infection, symptomatic	infectious diseases	71.1	logistic	24847	128	24719	0.033	0.088	1.033	0.71	-0.183	0.088	0.833	0.0372	7565	309	7256	-0.021469	0.0611924	0.97876	0.725705	0.0137991	0.0618684	1.01389	0.823504
Atherosclerosis of native arteries of the extremities with ulceration or gangrene	circulatory system	440.21	logistic	22967	70	22897	-0.045	0.12	0.956	0.71	-0.053	0.119	0.949	0.658	8462	51	8411	0.184708	0.149572	1.20287	0.216864	0.0397384	0.151404	1.04054	0.792962
Obstruction of bile duct	digestive	575.2	logistic	27559	126	27433	-0.033	0.089	0.967	0.71	0.174	0.089	1.19	0.0516	9527	33	9494	0.0658947	0.174452	1.06811	0.705636	0.00268247	0.178371	1.00269	0.988001
Primary angle-closure glaucoma	sense organs	365.2	logistic	26825	120	26705	-0.034	0.092	0.966	0.712	-0.059	0.092	0.943	0.52	8628	94	8534	-0.0249903	0.107615	0.975319	0.816367	-0.077182	0.108855	0.925721	0.478305
Abnormal results of function study of thyroid	endocrine/metabolic	246.7	logistic	22477	162	22315	-0.029	0.08	0.971	0.714	0.141	0.079	1.151	0.0741	8270	63	8207	-0.214656	0.129701	0.806819	0.0979241	-0.199299	0.131971	0.819305	0.130999
Myopathy	neurological	359.2	logistic	27180	98	27082	0.037	0.101	1.038	0.714	0.039	0.101	1.04	0.701	9356	45	9311	0.247313	0.154464	1.28058	0.109355	-0.0428401	0.15551	0.958065	0.782946
Aneurysm of iliac artery	circulatory system	442.2	logistic	22966	69	22897	0.044	0.12	1.045	0.715	-0.071	0.121	0.932	0.56	8428	17	8411	NA	NA	NA	NA	NA	NA	NA	NA
Autoimmune hemolytic anemias	hematopoietic	283.1	logistic	20104	23	20081	0.076	0.21	1.079	0.716	0.008	0.209	1.008	0.97	5206	5	5201	NA	NA	NA	NA	NA	NA	NA	NA
Peripheral vascular disease	circulatory system	443	logistic	24304	1407	22897	-0.01	0.028	0.99	0.717	-0.015	0.028	0.985	0.598	8973	562	8411	-0.0519193	0.0461532	0.949405	0.260617	-0.0222557	0.0466483	0.97799	0.633293
Unspecified disorder of lipoid metabolism	endocrine/metabolic	272.9	logistic	14141	57	14084	-0.048	0.133	0.953	0.719	0.01	0.135	1.01	0.941	5210	20	5190	-0.133922	0.239696	0.874659	0.576356	0.0822356	0.246868	1.08571	0.739047
Cystic mastopathy	genitourinary	610.1	logistic	26683	98	26585	0.037	0.102	1.038	0.719	0.042	0.102	1.043	0.679	8462	49	8413	0.0835622	0.147503	1.08715	0.571047	0.252054	0.148779	1.28667	0.0902363
Systemic sclerosis	dermatologic	709.3	logistic	23950	68	23882	0.044	0.123	1.045	0.719	0.052	0.122	1.054	0.669	7963	35	7928	-0.164551	0.175277	0.848275	0.347831	0.0375419	0.179699	1.03826	0.834514
Valvular heart disease/ heart chambers	congenital anomalies	747.12	logistic	27680	598	27082	0.015	0.041	1.015	0.719	-0.047	0.041	0.954	0.256	9915	38	9877	0.117597	0.162117	1.12479	0.468219	-0.0515563	0.164369	0.94975	0.753777
Aseptic necrosis of bone	musculoskeletal	733.4	logistic	24990	136	24854	0.031	0.086	1.031	0.72	0.048	0.086	1.049	0.578	8270	117	8153	-0.00200864	0.0973465	0.997993	0.983538	-0.0260691	0.0983676	0.974268	0.790996
Polyp of female genital organs	genitourinary	622	logistic	28615	111	28504	-0.034	0.096	0.966	0.721	0.046	0.096	1.047	0.633	9820	107	9713	-0.0122823	0.100711	0.987793	0.902934	-0.192064	0.102549	0.825254	0.0610836
Scar conditions and fibrosis of skin	dermatologic	701.2	logistic	26845	288	26557	0.021	0.059	1.021	0.721	-0.081	0.059	0.923	0.173	9219	35	9184	-0.209835	0.175467	0.810718	0.231748	0.129149	0.173261	1.13786	0.45603
Cancer of urinary organs (incl. kidney and bladder)	neoplasms	189	logistic	28889	1154	27735	0.011	0.03	1.011	0.722	0.006	0.03	1.006	0.855	10224	278	9946	0.0199588	0.0636394	1.02016	0.753807	0.0980218	0.0642477	1.10299	0.127088
Other conditions of brain	neurological	348	logistic	25720	740	24980	0.013	0.037	1.013	0.722	-0.028	0.037	0.973	0.458	8828	459	8369	-0.00499719	0.0497322	0.995015	0.919962	-0.0855803	0.0503006	0.917979	0.088872
Periapical abscess	digestive	522.5	logistic	27596	22	27574	0.076	0.215	1.079	0.722	0.319	0.214	1.376	0.136	8863	51	8812	-0.099463	0.145279	0.905323	0.493575	0.0864447	0.149107	1.09029	0.562083
Macular degeneration (senile) of retina NOS	sense organs	362.29	logistic	26474	86	26388	0.039	0.11	1.04	0.723	0.027	0.109	1.027	0.806	8242	9	8233	NA	NA	NA	NA	NA	NA	NA	NA
Gross hematuria	genitourinary	593.1	logistic	23620	333	23287	-0.02	0.056	0.981	0.723	0.048	0.056	1.049	0.385	7054	162	6892	-0.00590916	0.0815562	0.994108	0.94224	-0.0805864	0.0823916	0.922575	0.32803
Congenital deficiency of other clotting factors (including factor VII)	hematopoietic	286.12	logistic	20761	20	20741	0.079	0.224	1.082	0.724	-0.401	0.224	0.67	0.0734	7980	7	7973	NA	NA	NA	NA	NA	NA	NA	NA
Other cardiac conduction disorders	circulatory system	426.8	logistic	15234	72	15162	0.042	0.118	1.042	0.725	-0.105	0.118	0.9	0.373	5345	54	5291	0.227299	0.145813	1.2552	0.119035	0.0880357	0.147037	1.09203	0.549351
Throat pain	respiratory	478	logistic	21857	74	21783	-0.041	0.117	0.96	0.725	0.113	0.116	1.119	0.332	6256	95	6161	0.0612935	0.106239	1.06321	0.563978	-0.24917	0.108867	0.779448	0.0220939
Jaundice (not of newborn)	digestive	573.5	logistic	24491	113	24378	-0.033	0.094	0.967	0.725	-0.061	0.094	0.94	0.516	8197	22	8175	-0.138461	0.22099	0.870697	0.530957	-0.0959297	0.226213	0.908528	0.671516
Other abnormality of urination	genitourinary	599.9	logistic	22926	673	22253	0.014	0.039	1.014	0.725	0.016	0.04	1.016	0.695	6862	373	6489	0.0102682	0.0563957	1.01032	0.855524	-0.000137462	0.0561916	0.999863	0.998048
Mammographic microcalcification	genitourinary	611.11	logistic	26618	33	26585	-0.062	0.177	0.94	0.725	-0.387	0.176	0.679	0.0282	8422	9	8413	NA	NA	NA	NA	NA	NA	NA	NA
Erectile dysfunction [ED]	genitourinary	605	logistic	24775	994	23781	0.012	0.033	1.012	0.726	-0.029	0.033	0.971	0.381	9067	650	8417	-0.0302304	0.0495541	0.970222	0.54183	-0.0132484	0.0489746	0.986839	0.786764
Other local infections of skin and subcutaneous tissue	dermatologic	686	logistic	25814	152	25662	0.029	0.082	1.029	0.726	0.216	0.082	1.241	0.00811	8162	130	8032	-0.0236406	0.091681	0.976637	0.796517	-0.0687785	0.0926587	0.933533	0.457919
Secondary malignancy of bone	neoplasms	198.6	logistic	23710	283	23427	0.021	0.06	1.021	0.727	-0.016	0.06	0.985	0.795	9012	86	8926	-0.183515	0.110547	0.832339	0.0969021	-0.00708304	0.112103	0.992942	0.94962
Chronic pharyngitis and nasopharyngitis	respiratory	472	logistic	22212	429	21783	-0.017	0.049	0.983	0.727	0.053	0.048	1.054	0.275	6364	203	6161	-0.00868776	0.0736877	0.99135	0.906147	-0.122895	0.0757319	0.884357	0.10464
Allergic rhinitis	respiratory	476	logistic	23253	1470	21783	-0.009	0.027	0.991	0.727	0.065	0.027	1.067	0.0152	7321	1160	6161	-0.0120328	0.0337499	0.988039	0.721445	-0.0375717	0.0343993	0.963125	0.274736
Synovitis and tenosynovitis	musculoskeletal	727.1	logistic	23868	395	23473	-0.018	0.051	0.982	0.729	-0.043	0.051	0.958	0.394	7129	396	6733	0.0253066	0.0544406	1.02563	0.642041	-0.0126981	0.0552003	0.987382	0.818064
Stiffness of joint	musculoskeletal	741.2	logistic	26899	83	26816	-0.038	0.111	0.963	0.73	-0.01	0.11	0.99	0.928	8455	56	8399	-0.0783444	0.136406	0.924646	0.565734	-0.00327421	0.139502	0.996731	0.981275
Atherosclerosis of native arteries of the extremities with intermittent claudication	circulatory system	440.22	logistic	23101	204	22897	0.024	0.071	1.024	0.733	-0.034	0.07	0.966	0.627	8512	101	8411	0.0998504	0.103783	1.10501	0.335996	0.0865896	0.104278	1.09045	0.406327
Fracture of clavicle or scapula	injuries & poisonings	803.3	logistic	26922	64	26858	0.043	0.125	1.043	0.734	0.131	0.125	1.14	0.293	9101	21	9080	-0.18364	0.227236	0.832236	0.419007	-0.138994	0.23008	0.870233	0.54577
Erythematous conditions	dermatologic	695	logistic	24990	786	24204	0.012	0.036	1.012	0.735	0.004	0.036	1.004	0.904	8464	442	8022	0.0152296	0.0508698	1.01535	0.764647	0.0570172	0.0516609	1.05867	0.269731
Cancer, suspected or other	neoplasms	195	logistic	24384	957	23427	-0.011	0.033	0.989	0.736	-0.027	0.033	0.973	0.409	9114	188	8926	-0.0355203	0.0751545	0.965103	0.636477	0.0419651	0.0764231	1.04286	0.582927
Inguinal hernia	digestive	550.1	logistic	25942	661	25281	-0.013	0.04	0.987	0.737	0.006	0.04	1.006	0.881	8920	161	8759	0.0757718	0.0823751	1.07872	0.357657	-0.00634466	0.0836596	0.993675	0.939547
Aphasia	mental disorders	292.11	logistic	25497	92	25405	-0.035	0.105	0.966	0.739	-0.09	0.104	0.914	0.389	8414	44	8370	0.0696259	0.154006	1.07211	0.651199	0.214132	0.154463	1.23879	0.165656
Suicidal ideation or attempt	mental disorders	297	logistic	19327	63	19264	-0.042	0.126	0.959	0.74	-0.086	0.126	0.917	0.495	5821	87	5734	0.0364309	0.113441	1.0371	0.748101	0.132855	0.115639	1.14208	0.250606
Encephalitis	neurological	323	logistic	28706	28	28678	0.063	0.19	1.065	0.74	0.014	0.189	1.014	0.943	10017	14	10003	NA	NA	NA	NA	NA	NA	NA	NA
Peritonitis and retroperitoneal infections	digestive	567	logistic	26079	244	25835	-0.021	0.064	0.979	0.741	-0.003	0.064	0.997	0.96	8748	105	8643	-0.0103509	0.100197	0.989702	0.917721	0.0198391	0.102509	1.02004	0.846539
Renal failure NOS	genitourinary	585.2	logistic	21499	62	21437	0.042	0.127	1.043	0.741	0.074	0.127	1.077	0.56	6365	132	6233	-0.0067038	0.0925554	0.993319	0.94226	0.00109469	0.0953169	1.0011	0.990837
Neoplasm of uncertain behavior of male genital organs	neoplasms	187.8	logistic	27081	40	27041	0.052	0.157	1.053	0.742	0.017	0.158	1.017	0.913	9677	8	9669	NA	NA	NA	NA	NA	NA	NA	NA
Septal Deviations/Turbinate Hypertrophy	respiratory	470	logistic	22113	330	21783	0.018	0.056	1.018	0.742	0.025	0.055	1.025	0.656	6246	85	6161	-0.0637067	0.111817	0.93828	0.568854	-0.141137	0.113279	0.86837	0.212792
Sarcoidosis	dermatologic	697	logistic	24437	233	24204	-0.022	0.066	0.978	0.742	-0.035	0.066	0.965	0.593	8293	271	8022	0.0135777	0.0641363	1.01367	0.832341	-0.00444447	0.0649305	0.995565	0.945428
Basal cell carcinoma	neoplasms	172.21	logistic	24393	550	23843	-0.014	0.043	0.986	0.743	0.012	0.043	1.012	0.778	9701	4	9697	NA	NA	NA	NA	NA	NA	NA	NA
Benign neoplasm of respiratory and intrathoracic organs	neoplasms	212	logistic	29038	89	28949	-0.035	0.107	0.966	0.743	-0.019	0.107	0.981	0.859	10259	32	10227	0.276531	0.185911	1.31855	0.1369	-0.101307	0.186501	0.903656	0.586995
Other diseases of respiratory system, not elsewhere classified	respiratory	519	logistic	28017	527	27490	0.014	0.044	1.014	0.744	0.034	0.044	1.035	0.432	9591	255	9336	0.00484759	0.0660609	1.00486	0.941503	0.0821815	0.0665391	1.08565	0.216798
Stricture and stenosis of esophagus	digestive	530.3	logistic	18615	124	18491	0.03	0.091	1.03	0.745	-0.025	0.09	0.975	0.781	5761	38	5723	0.0465644	0.170808	1.04767	0.785152	-0.082409	0.174203	0.920895	0.636168
Polyp of corpus uteri	genitourinary	622.1	logistic	28580	76	28504	-0.038	0.116	0.963	0.746	-0.041	0.116	0.96	0.728	9794	81	9713	-0.0973275	0.115086	0.907259	0.397725	-0.204694	0.117436	0.814897	0.0813298
Cervical radiculitis	symptoms	765	logistic	25782	409	25373	-0.016	0.05	0.984	0.746	0.011	0.05	1.011	0.827	8147	314	7833	-0.00959064	0.0597047	0.990455	0.872381	-0.0604983	0.0604087	0.941295	0.316594
Pain, swelling or discharge of eye	sense organs	379.9	logistic	26489	57	26432	-0.043	0.134	0.958	0.747	0.131	0.133	1.14	0.325	8454	131	8323	0.0297926	0.0918554	1.03024	0.745678	0.150053	0.0936714	1.1619	0.109175
Disease of capillaries	circulatory system	448	logistic	22922	25	22897	-0.065	0.203	0.937	0.747	0.352	0.201	1.422	0.0801	8416	5	8411	NA	NA	NA	NA	NA	NA	NA	NA
Disorders of the autonomic nervous system	neurological	337	logistic	25045	65	24980	-0.04	0.124	0.961	0.748	-0.053	0.125	0.948	0.668	8383	14	8369	NA	NA	NA	NA	NA	NA	NA	NA
Urticaria	dermatologic	947	logistic	23572	175	23397	0.024	0.076	1.024	0.753	-0.002	0.076	0.998	0.982	7567	154	7413	0.0124168	0.0853769	1.01249	0.884368	0.046476	0.0874822	1.04757	0.595237
Spinal stenosis	musculoskeletal	720	logistic	25501	1134	24367	0.01	0.031	1.01	0.754	-0.077	0.031	0.926	0.012	8507	498	8009	-0.0585413	0.04861	0.943139	0.228472	-0.0554133	0.0491312	0.946094	0.259378
Other specified erythematous conditions	dermatologic	695.8	logistic	24310	106	24204	0.031	0.098	1.031	0.755	-0.007	0.098	0.993	0.943	8070	48	8022	0.0159072	0.151268	1.01603	0.916249	-0.0826141	0.152989	0.920706	0.589197
Other CNS infection and poliomyelitis	neurological	324	logistic	28752	74	28678	-0.036	0.116	0.965	0.756	-0.047	0.117	0.954	0.684	10044	41	10003	-0.283807	0.158931	0.752912	0.0741435	0.286509	0.162701	1.33177	0.0782467
Symptoms involving skin and other integumentary tissue	symptoms	782	logistic	26078	1041	25037	-0.01	0.032	0.99	0.758	0.013	0.032	1.013	0.69	8387	752	7635	-0.0113608	0.0405111	0.988703	0.779142	0.0372108	0.0408303	1.03791	0.362109
Hydrocephalus	neurological	331.1	logistic	25078	98	24980	0.031	0.101	1.031	0.76	-0.045	0.102	0.956	0.661	8394	25	8369	0.466624	0.201125	1.5946	0.020337	0.108684	0.201407	1.11481	0.589456
Abnormal findings on mammogram or breast exam	genitourinary	611	logistic	27483	898	26585	0.011	0.035	1.011	0.76	0.005	0.035	1.005	0.892	9047	634	8413	-0.00563793	0.043785	0.994378	0.897545	-0.0466976	0.0446804	0.954376	0.295955
Endometrial hyperplasia	genitourinary	621	logistic	28550	46	28504	-0.045	0.149	0.956	0.76	0.095	0.15	1.099	0.528	9758	45	9713	0.0820075	0.155666	1.08546	0.59832	0.0902863	0.158975	1.09449	0.570085
Viremia, NOS	infectious diseases	79.9	logistic	24797	78	24719	-0.034	0.113	0.966	0.761	0	0.113	1	0.997	7340	84	7256	-0.0430647	0.112036	0.957849	0.700695	-0.0160875	0.114191	0.984041	0.887963
Respiratory failure, insufficiency, arrest	respiratory	509	logistic	25139	1129	24010	0.009	0.031	1.009	0.761	-0.007	0.031	0.993	0.825	8748	588	8160	0.0120364	0.0443005	1.01211	0.785853	0.0167821	0.0449325	1.01692	0.708779
Viral Enteritis	infectious diseases	8.6	logistic	27989	52	27937	-0.042	0.139	0.959	0.762	-0.187	0.139	0.829	0.178	9512	40	9472	0.298978	0.164526	1.34848	0.069186	0.36197	0.167596	1.43616	0.0307894
Gouty arthropathy	endocrine/metabolic	274.11	logistic	27516	260	27256	-0.019	0.063	0.981	0.762	-0.105	0.062	0.9	0.0913	9561	234	9327	0.00704406	0.0682555	1.00707	0.917803	0.00235834	0.0692618	1.00236	0.972838
Idiopathic fibrosing alveolitis	respiratory	504.1	logistic	24209	199	24010	-0.021	0.071	0.979	0.763	-0.056	0.071	0.946	0.433	8203	43	8160	0.0984088	0.152765	1.10341	0.519456	-0.111517	0.156102	0.894476	0.474986
Mineral deficiency NEC	endocrine/metabolic	262	logistic	22735	55	22680	-0.041	0.136	0.96	0.765	-0.105	0.136	0.9	0.438	6942	23	6919	-0.151395	0.209349	0.859508	0.469575	-0.0931945	0.215041	0.911016	0.664738
Sprains and strains of back and neck	injuries & poisonings	841	logistic	26336	61	26275	-0.038	0.128	0.962	0.765	0.031	0.129	1.031	0.813	7997	154	7843	-0.151242	0.0853865	0.859639	0.0765165	-0.0373458	0.0870461	0.963343	0.667898
Cushing's syndrome	endocrine/metabolic	255.11	logistic	25900	55	25845	-0.04	0.136	0.961	0.769	0.005	0.136	1.005	0.971	8610	15	8595	NA	NA	NA	NA	NA	NA	NA	NA
Paralytic ileus	digestive	560.1	logistic	20956	64	20892	0.037	0.126	1.038	0.769	0.196	0.125	1.216	0.116	6511	36	6475	0.0464547	0.167686	1.04755	0.781754	0.154436	0.169447	1.167	0.362078
Menopausal and postmenopausal disorders	genitourinary	627	logistic	26370	983	25387	0.01	0.034	1.01	0.769	0.049	0.034	1.051	0.149	7987	567	7420	0.000517173	0.0468258	1.00052	0.991188	-0.0452427	0.0480954	0.955765	0.346865
Cervical cancer and dysplasia	neoplasms	180	logistic	24165	162	24003	-0.023	0.08	0.977	0.77	0.112	0.08	1.119	0.161	7448	194	7254	-0.0334654	0.0754626	0.967088	0.657426	0.00421452	0.078031	1.00422	0.956927
Other diseases of the teeth and supporting structures	digestive	525	logistic	27677	103	27574	0.029	0.099	1.029	0.77	0.059	0.099	1.061	0.552	8941	129	8812	0.0479835	0.091969	1.04915	0.601854	0.0221109	0.0932964	1.02236	0.81266
Dementias	mental disorders	290.1	logistic	25578	173	25405	-0.023	0.078	0.978	0.771	-0.035	0.077	0.966	0.654	8464	94	8370	-0.00953592	0.109077	0.990509	0.930335	0.0660159	0.110052	1.06824	0.548599
Other disorders of synovium, tendon, and bursa	musculoskeletal	727	logistic	24454	981	23473	-0.01	0.033	0.99	0.771	-0.023	0.033	0.978	0.491	7531	798	6733	-0.00452279	0.0395201	0.995487	0.908887	-0.0650308	0.0401143	0.937039	0.104988
Delirium dementia and amnestic and other cognitive disorders	mental disorders	290	logistic	25654	249	25405	0.018	0.065	1.019	0.775	-0.02	0.064	0.98	0.751	8499	129	8370	-0.110386	0.0938579	0.895489	0.239558	-0.0100812	0.0941622	0.989969	0.91474
Acute upper respiratory infections of multiple or unspecified sites	respiratory	465	logistic	25720	1468	24252	-0.008	0.027	0.992	0.776	0.007	0.027	1.007	0.783	8189	1369	6820	0.0115366	0.031027	1.0116	0.710024	-0.043101	0.0316581	0.957815	0.17337
Infection with drug-resistant microorganisms	infectious diseases	41.9	logistic	25293	45	25248	-0.042	0.15	0.958	0.777	0.024	0.149	1.024	0.872	8186	27	8159	0.275037	0.196566	1.31658	0.161751	-0.0952365	0.201405	0.909158	0.636313
Pernicious anemia	hematopoietic	281.11	logistic	20122	41	20081	0.045	0.158	1.046	0.778	0.12	0.157	1.127	0.445	5224	23	5201	0.0385911	0.212118	1.03935	0.855636	0.000923812	0.219126	1.00092	0.996636
Adjustment reaction	mental disorders	304	logistic	19450	186	19264	-0.021	0.074	0.979	0.778	0.003	0.074	1.003	0.963	5907	173	5734	-0.0629016	0.0789419	0.939036	0.425562	0.0382221	0.0813631	1.03896	0.638518
Osteoarthrosis, localized, primary	musculoskeletal	740.11	logistic	25607	1883	23724	-0.007	0.024	0.993	0.778	0.005	0.024	1.005	0.824	8551	1591	6960	0.00152873	0.0307935	1.00153	0.960406	-0.016143	0.0310886	0.983987	0.603582
Varicose veins	circulatory system	454	logistic	20158	319	19839	-0.016	0.057	0.984	0.779	-0.013	0.056	0.987	0.817	6631	141	6490	-0.0214596	0.0862533	0.978769	0.803518	-0.116395	0.0878926	0.890123	0.185407
Circulatory disease NEC	circulatory system	459.9	logistic	24129	412	23717	-0.014	0.05	0.986	0.779	-0.006	0.05	0.994	0.906	7774	314	7460	-0.0278184	0.060588	0.972565	0.646133	0.0417952	0.0612769	1.04268	0.495195
Nonrheumatic pulmonary valve disorders	circulatory system	395.4	logistic	22019	56	21963	0.037	0.134	1.038	0.78	0.062	0.135	1.063	0.647	8381	13	8368	NA	NA	NA	NA	NA	NA	NA	NA
Cancer of bronchus; lung	neoplasms	165.1	logistic	28861	727	28134	-0.011	0.038	0.99	0.781	0.01	0.038	1.01	0.791	10230	192	10038	-0.145382	0.0754906	0.864692	0.0541262	-0.0605999	0.0765509	0.9412	0.428577
Giant cell arteritis	circulatory system	446.5	logistic	22934	37	22897	0.046	0.167	1.047	0.781	-0.236	0.165	0.79	0.152	8428	17	8411	NA	NA	NA	NA	NA	NA	NA	NA
Disorders of plasma protein metabolism	endocrine/metabolic	270.3	logistic	27814	303	27511	0.016	0.058	1.016	0.782	0.011	0.058	1.011	0.855	9217	164	9053	-0.0635451	0.0821059	0.938432	0.438966	0.0790744	0.0830704	1.08228	0.34115
Pervasive developmental disorders	mental disorders	313	logistic	28515	343	28172	0.015	0.055	1.015	0.782	-0.011	0.055	0.989	0.84	9980	52	9928	-0.0538512	0.13417	0.947573	0.688152	-0.0373537	0.140617	0.963335	0.790516
Umbilical hernia	digestive	550.4	logistic	25541	260	25281	0.017	0.062	1.017	0.783	0.084	0.062	1.087	0.176	8915	156	8759	0.0487829	0.083459	1.04999	0.558875	0.166055	0.0854515	1.18064	0.0519844
Postmenopausal bleeding	genitourinary	627.1	logistic	25613	226	25387	0.019	0.068	1.019	0.783	0.023	0.068	1.024	0.734	7634	214	7420	0.0212786	0.0723622	1.02151	0.768714	0.0449862	0.0743147	1.04601	0.544948
Encephalopathy, not elsewhere classified	neurological	348.8	logistic	25074	94	24980	-0.028	0.103	0.972	0.785	-0.048	0.104	0.953	0.645	8409	40	8369	0.149412	0.170555	1.16115	0.381012	-0.212729	0.173538	0.808375	0.220261
Poisoning by primarily systemic agents	injuries & poisonings	963	logistic	23080	452	22628	-0.013	0.048	0.987	0.786	-0.012	0.047	0.988	0.799	7756	195	7561	0.107888	0.0746709	1.11392	0.148502	-0.134973	0.0759093	0.87374	0.0753911
Arteritis NOS	circulatory system	446.9	logistic	22979	82	22897	-0.03	0.111	0.97	0.787	0.048	0.111	1.049	0.665	8439	28	8411	-0.169492	0.194523	0.844094	0.38358	-0.134424	0.195539	0.874219	0.491797
Hypopotassemia	endocrine/metabolic	276.14	logistic	21996	633	21363	0.011	0.041	1.011	0.788	-0.026	0.04	0.975	0.528	7208	667	6541	0.0275816	0.0431969	1.02797	0.523143	0.00682341	0.0432056	1.00685	0.874513
Subdural hemorrhage	circulatory system	430.3	logistic	24702	71	24631	-0.032	0.12	0.969	0.789	0.044	0.12	1.045	0.714	8685	37	8648	-0.060487	0.167988	0.941306	0.718796	0.264153	0.17174	1.30233	0.124024
Restless legs syndrome	neurological	327.71	logistic	21640	249	21391	-0.017	0.064	0.983	0.79	-0.015	0.064	0.985	0.811	6466	68	6398	0.0591477	0.125764	1.06093	0.638136	0.0102191	0.12786	1.01027	0.936298
Anaphylactic shock NOS	injuries & poisonings	946	logistic	23435	38	23397	-0.043	0.163	0.958	0.79	0.195	0.163	1.216	0.23	7494	81	7413	-0.136672	0.116989	0.872256	0.242707	0.0540564	0.120173	1.05554	0.652838
Perforation of tympanic membrane	sense organs	384.4	logistic	27039	34	27005	0.046	0.172	1.047	0.791	0.135	0.172	1.144	0.432	9058	9	9049	NA	NA	NA	NA	NA	NA	NA	NA
Calcaneal spur; Exostosis NOS	musculoskeletal	726.4	logistic	23493	20	23473	0.059	0.224	1.061	0.791	0.146	0.224	1.157	0.514	6759	26	6733	0.222409	0.203291	1.24908	0.273936	-0.150005	0.208368	0.860704	0.471586
Thyroid cancer	neoplasms	193	logistic	28486	773	27713	-0.01	0.037	0.99	0.793	0.01	0.037	1.01	0.783	10013	121	9892	-0.0118028	0.0918768	0.988267	0.897783	0.120288	0.0939013	1.12782	0.200193
Meningitis	neurological	320	logistic	28719	41	28678	-0.041	0.157	0.96	0.793	-0.166	0.156	0.847	0.287	10042	39	10003	0.0727429	0.164775	1.07545	0.658874	0.06279	0.166855	1.0648	0.706683
Uveitis, noninfectious or NOS	sense organs	371.1	logistic	26523	73	26450	0.031	0.118	1.031	0.793	-0.2	0.117	0.819	0.0884	8611	105	8506	-0.0136965	0.102485	0.986397	0.893685	0.0468661	0.103815	1.04798	0.651674
Other diseases of respiratory system, NEC	respiratory	519.8	logistic	27642	152	27490	-0.021	0.082	0.979	0.794	0.102	0.081	1.107	0.21	9403	67	9336	-0.0403727	0.127279	0.960431	0.751094	0.0403069	0.127522	1.04113	0.751943
Antineoplastic and immunosuppressive drugs causing adverse effects	injuries & poisonings	963.1	logistic	23073	445	22628	-0.013	0.048	0.988	0.794	-0.025	0.048	0.976	0.607	7749	188	7561	0.0902654	0.076181	1.09446	0.236065	-0.132106	0.0774163	0.876248	0.0879272
Nephritis and nephropathy with pathological lesion	genitourinary	580.32	logistic	21570	133	21437	-0.023	0.087	0.978	0.795	0.117	0.087	1.124	0.182	6303	70	6233	0.279438	0.12321	1.32239	0.0233305	0.101928	0.123727	1.1073	0.410044
Premature menopause and other ovarian failure	genitourinary	627.5	logistic	25441	54	25387	-0.036	0.138	0.965	0.796	0.176	0.137	1.192	0.201	7440	20	7420	-0.140632	0.232085	0.868809	0.544546	-0.305751	0.241216	0.73657	0.204962
Disturbances of sulphur-bearing amino-acid metabolism	endocrine/metabolic	270.11	logistic	27535	24	27511	-0.052	0.205	0.949	0.798	0.195	0.204	1.216	0.338	9055	2	9053	NA	NA	NA	NA	NA	NA	NA	NA
Peripheral retinal degenerations	sense organs	362.6	logistic	26436	48	26388	0.037	0.146	1.038	0.798	-0.11	0.144	0.896	0.445	8263	30	8233	0.255899	0.192026	1.29162	0.182656	-0.194233	0.192927	0.823466	0.314044
Cholelithiasis	digestive	574.1	logistic	27886	453	27433	-0.012	0.048	0.988	0.798	-0.02	0.047	0.98	0.666	9787	293	9494	-0.0490352	0.0610644	0.952148	0.42197	-0.0116133	0.0618725	0.988454	0.851114
Chronic interstitial cystitis	genitourinary	592.13	logistic	23351	64	23287	-0.032	0.126	0.968	0.799	0.142	0.126	1.153	0.26	6906	14	6892	NA	NA	NA	NA	NA	NA	NA	NA
Viral warts & HPV	infectious diseases	78	logistic	24963	244	24719	0.016	0.064	1.016	0.8	0.053	0.064	1.055	0.406	7404	148	7256	0.00433487	0.0855427	1.00434	0.959585	0.0475626	0.0870231	1.04871	0.584687
Other cerebral degenerations	neurological	331	logistic	25093	113	24980	0.024	0.094	1.024	0.8	-0.079	0.095	0.924	0.407	8398	29	8369	0.487232	0.187397	1.6278	0.00932257	-0.0731001	0.187418	0.929508	0.696509
Disorders of bilirubin excretion	endocrine/metabolic	277.4	logistic	27365	137	27228	0.022	0.085	1.022	0.801	-0.115	0.086	0.892	0.18	9479	41	9438	-0.177213	0.162843	0.837601	0.276485	0.0369376	0.162566	1.03763	0.820256
Cerebral artery occlusion, with cerebral infarction	circulatory system	433.21	logistic	25243	612	24631	0.01	0.041	1.01	0.801	-0.041	0.041	0.96	0.323	9138	490	8648	-0.0238159	0.0482073	0.976465	0.621284	-0.00667941	0.0489666	0.993343	0.891499
Aortic aneurysm	circulatory system	442.1	logistic	24384	1487	22897	-0.007	0.027	0.993	0.802	0.005	0.027	1.005	0.846	8647	236	8411	-0.0610172	0.0684519	0.940807	0.372722	-0.00768634	0.0685612	0.992343	0.910737
Other deficiency anemia	hematopoietic	281	logistic	20212	131	20081	-0.022	0.088	0.978	0.803	0.123	0.088	1.131	0.163	5304	103	5201	-0.096022	0.104143	0.908444	0.356516	0.0195535	0.105964	1.01975	0.853598
Other hemoglobinopathies	hematopoietic	282.8	logistic	20126	45	20081	0.038	0.154	1.039	0.803	-0.052	0.152	0.949	0.729	5285	84	5201	0.148828	0.12077	1.16047	0.217828	0.202998	0.119819	1.22507	0.0902265
Disorders of parathyroid gland	endocrine/metabolic	252	logistic	26303	458	25845	-0.012	0.047	0.988	0.804	0.011	0.047	1.011	0.821	8849	254	8595	-0.0235716	0.0663136	0.976704	0.722247	-0.0667521	0.0670541	0.935427	0.319495
Reflux esophagitis	digestive	530.14	logistic	18796	305	18491	0.014	0.058	1.015	0.804	0.011	0.058	1.011	0.845	5902	179	5723	-0.0467177	0.0789957	0.954357	0.554256	-0.0824626	0.0803478	0.920846	0.30474
Diseases of sebaceous glands	dermatologic	706	logistic	26743	822	25921	-0.009	0.036	0.991	0.804	0.043	0.036	1.044	0.23	8744	426	8318	-0.062406	0.0513747	0.939501	0.224472	0.0388916	0.0522493	1.03966	0.456667
Other disorders of circulatory system	circulatory system	459	logistic	24487	770	23717	-0.009	0.037	0.991	0.805	0.028	0.037	1.028	0.451	8001	541	7460	-0.0177622	0.0468258	0.982395	0.704447	0.0170977	0.0473817	1.01724	0.718211
Cancer of larynx	neoplasms	149.4	logistic	28451	114	28337	-0.023	0.094	0.977	0.807	-0.072	0.093	0.93	0.437	10183	16	10167	NA	NA	NA	NA	NA	NA	NA	NA
Congenital anomalies of intestine	congenital anomalies	750.21	logistic	28239	20	28219	-0.055	0.226	0.946	0.807	-0.118	0.225	0.889	0.602	9919	5	9914	NA	NA	NA	NA	NA	NA	NA	NA
Benign mammary dysplasias	genitourinary	610	logistic	26761	176	26585	0.019	0.077	1.019	0.808	-0.034	0.076	0.967	0.658	8521	108	8413	-0.0159867	0.0994273	0.98414	0.87226	0.0105737	0.100951	1.01063	0.916581
Other disorders of tympanic membrane	sense organs	384	logistic	27045	40	27005	0.038	0.158	1.039	0.81	0.026	0.158	1.026	0.87	9059	10	9049	NA	NA	NA	NA	NA	NA	NA	NA
Bronchopneumonia and lung abscess	respiratory	480.5	logistic	24947	31	24916	0.043	0.18	1.044	0.81	0.035	0.18	1.036	0.846	7944	14	7930	NA	NA	NA	NA	NA	NA	NA	NA
Back pain	symptoms	760	logistic	26235	2616	23619	0.005	0.021	1.005	0.811	0.004	0.021	1.004	0.849	8609	2450	6159	0.00607029	0.0250769	1.00609	0.808728	0.000585419	0.0252805	1.00059	0.981525
Digestive congenital anomalies	congenital anomalies	750	logistic	28298	79	28219	-0.027	0.113	0.973	0.812	-0.039	0.113	0.961	0.728	9944	30	9914	0.423073	0.192238	1.52665	0.0277517	-0.0825389	0.193313	0.920776	0.669401
Chronic lymphocytic thyroiditis	endocrine/metabolic	245.21	logistic	22521	206	22315	-0.017	0.071	0.983	0.814	-0.04	0.07	0.961	0.568	8229	22	8207	0.123967	0.219414	1.13198	0.572081	0.439522	0.223833	1.55197	0.0495743
Voice disturbance	respiratory	473.4	logistic	22222	439	21783	-0.011	0.049	0.989	0.814	-0.013	0.048	0.987	0.792	6309	148	6161	-0.110107	0.0854687	0.895738	0.197652	0.0742056	0.0876093	1.07703	0.396992
Sleep related movement disorders	neurological	327.7	logistic	21728	337	21391	0.013	0.055	1.013	0.815	0.004	0.055	1.004	0.94	6492	94	6398	0.116624	0.107629	1.1237	0.278555	-0.0484669	0.109225	0.952689	0.657235
End stage renal disease	genitourinary	585.32	logistic	22200	763	21437	-0.009	0.037	0.991	0.815	-0.002	0.037	0.998	0.947	6955	722	6233	0.0358658	0.0418798	1.03652	0.391777	0.061163	0.0423864	1.06307	0.149025
Disorders of menstruation and other abnormal bleeding from female genital tract	genitourinary	626	logistic	26747	1360	25387	-0.007	0.031	0.993	0.815	-0.052	0.031	0.95	0.0991	8747	1327	7420	-0.0316596	0.0348245	0.968836	0.363287	-0.0587753	0.0358258	0.942919	0.100883
Neuroendocrine tumors	neoplasms	209	logistic	29094	147	28947	0.019	0.083	1.019	0.818	-0.086	0.083	0.917	0.297	10272	30	10242	0.0173178	0.186455	1.01747	0.925999	-0.0709192	0.189809	0.931537	0.708676
Type 2 diabetes with renal manifestations	endocrine/metabolic	250.22	logistic	21000	541	20459	0.01	0.044	1.01	0.818	0.015	0.044	1.016	0.724	6207	738	5469	0.0319754	0.0426853	1.03249	0.453799	0.019491	0.0430775	1.01968	0.650935
Other disorders of testis	genitourinary	603	logistic	23885	104	23781	0.023	0.098	1.023	0.818	-0.054	0.099	0.947	0.584	8468	51	8417	-0.0645652	0.15023	0.937475	0.667359	0.24991	0.14809	1.28391	0.0914957
Myeloid leukemia, chronic	neoplasms	204.22	logistic	27330	45	27285	0.034	0.15	1.035	0.819	-0.384	0.148	0.681	0.00956	9858	9	9849	NA	NA	NA	NA	NA	NA	NA	NA
Acute pulmonary heart disease	circulatory system	415.1	logistic	25669	451	25218	0.011	0.048	1.011	0.819	-0.004	0.047	0.996	0.926	8761	345	8416	-0.00278592	0.0566002	0.997218	0.960743	0.10238	0.0570615	1.1078	0.0727801
Candidiasis	infectious diseases	112	logistic	26124	451	25673	-0.011	0.048	0.989	0.82	-0.023	0.048	0.977	0.627	8170	533	7637	0.00850003	0.0472303	1.00854	0.857176	-0.0392097	0.0475506	0.961549	0.409606
Benign neoplasm of lip, oral cavity, and pharynx	neoplasms	210	logistic	28402	65	28337	0.028	0.125	1.029	0.82	-0.029	0.124	0.971	0.816	10186	19	10167	NA	NA	NA	NA	NA	NA	NA	NA
Ptosis of eyelid	sense organs	374.3	logistic	26565	115	26450	-0.021	0.094	0.979	0.822	0.002	0.093	1.002	0.984	8555	49	8506	-0.152872	0.145731	0.858239	0.294178	-0.170984	0.149113	0.842835	0.251515
Bacterial enteritis	infectious diseases	8.5	logistic	28161	224	27937	-0.015	0.067	0.985	0.823	-0.105	0.067	0.9	0.116	9641	169	9472	0.127161	0.0804272	1.1356	0.113863	0.021394	0.0814585	1.02162	0.792831
Transient cerebral ischemia	circulatory system	433.31	logistic	25741	1110	24631	0.007	0.031	1.007	0.823	-0.041	0.031	0.96	0.186	9256	608	8648	-0.0110313	0.0438252	0.989029	0.801264	0.0701525	0.0441937	1.07267	0.112425
Dysphagia	digestive	532	logistic	19833	1342	18491	-0.006	0.028	0.994	0.823	-0.041	0.028	0.959	0.143	6321	598	5723	0.0315337	0.0454411	1.03204	0.487716	-0.0416789	0.0458992	0.959178	0.36385
Diplopia and disorders of binocular vision	sense organs	368.2	logistic	27144	146	26998	-0.018	0.083	0.982	0.824	0.11	0.083	1.116	0.187	8720	62	8658	0.0158506	0.129874	1.01598	0.902863	-0.0982401	0.132353	0.906431	0.45793
Bacterial pneumonia	respiratory	480.1	logistic	25279	363	24916	-0.012	0.053	0.988	0.824	-0.053	0.053	0.949	0.323	8038	108	7930	-0.00222967	0.0996805	0.997773	0.982154	0.082109	0.10172	1.08557	0.419547
Duodenitis	digestive	535.6	logistic	26131	38	26093	0.036	0.164	1.037	0.825	-0.058	0.162	0.944	0.722	8461	38	8423	0.0525331	0.172217	1.05394	0.760335	0.042347	0.173701	1.04326	0.807392
Other and unspecified disc disorder	musculoskeletal	722.9	logistic	24459	92	24367	0.023	0.105	1.023	0.825	-0.103	0.104	0.902	0.323	8063	54	8009	-0.0958775	0.142318	0.908575	0.500511	0.0629345	0.143499	1.06496	0.660973
Abnormal mammogram	genitourinary	611.1	logistic	26919	334	26585	-0.012	0.056	0.988	0.826	0.041	0.056	1.042	0.461	8650	237	8413	0.0289359	0.0694184	1.02936	0.6768	-0.140629	0.0705445	0.868811	0.0462084
Anal and rectal conditions	digestive	565	logistic	26328	493	25835	-0.01	0.046	0.99	0.827	-0.053	0.045	0.948	0.241	8909	266	8643	0.00418769	0.0647674	1.0042	0.948447	0.0375704	0.06505	1.03829	0.563559
Early or threatened labor; hemorrhage in early pregnancy	pregnancy complications	636	logistic	28581	190	28391	0.016	0.075	1.016	0.827	0.064	0.075	1.067	0.389	9701	345	9356	-0.0165028	0.0620834	0.983633	0.790381	0.125981	0.0633981	1.13426	0.0469065
Disorders of external ear	sense organs	380	logistic	27781	304	27477	0.012	0.058	1.013	0.829	0.025	0.058	1.025	0.668	9488	190	9298	0.139594	0.0757232	1.14981	0.0652595	0.159999	0.0763293	1.17351	0.0360667
Diseases of the larynx and vocal cords	respiratory	473	logistic	22507	724	21783	-0.008	0.038	0.992	0.83	0.03	0.038	1.03	0.426	6454	293	6161	0.00053136	0.062023	1.00053	0.993164	0.0449728	0.0631124	1.046	0.476103
Mixed hyperlipidemia	endocrine/metabolic	272.13	logistic	17549	3465	14084	0.004	0.02	1.004	0.832	-0.006	0.021	0.994	0.788	6497	1307	5190	0.022136	0.0352848	1.02238	0.530428	0.0517517	0.0360996	1.05311	0.151692
Retention of urine	genitourinary	599.2	logistic	23018	765	22253	0.008	0.037	1.008	0.832	0.039	0.037	1.04	0.298	6774	285	6489	0.0616192	0.0652236	1.06356	0.344792	-0.0484285	0.0649684	0.952725	0.45602
Parasomnia	neurological	327.5	logistic	21432	41	21391	-0.033	0.157	0.968	0.834	0.159	0.157	1.172	0.311	6417	19	6398	NA	NA	NA	NA	NA	NA	NA	NA
Blood vessel replaced	circulatory system	459.7	logistic	23887	170	23717	-0.016	0.077	0.984	0.834	-0.021	0.077	0.979	0.784	7559	99	7460	0.0168306	0.105096	1.01697	0.872767	0.0127089	0.106577	1.01279	0.90508
Amyloidosis	endocrine/metabolic	270.33	logistic	27605	94	27511	0.021	0.103	1.022	0.835	-0.136	0.103	0.873	0.188	9099	46	9053	-0.0467073	0.152148	0.954367	0.758855	-0.0164797	0.148839	0.983655	0.911837
Partial epilepsy	neurological	345.12	logistic	25301	321	24980	0.012	0.056	1.012	0.836	-0.064	0.056	0.938	0.258	8514	145	8369	-0.0328896	0.0867167	0.967645	0.704482	0.0728924	0.0876329	1.07561	0.405526
Fracture of upper limb	injuries & poisonings	803	logistic	27249	391	26858	0.011	0.051	1.011	0.837	0.007	0.051	1.007	0.886	9216	136	9080	0.0530984	0.0899165	1.05453	0.554835	-0.0902655	0.0908991	0.913689	0.320696
Bipolar	mental disorders	296.1	logistic	19598	334	19264	0.011	0.055	1.011	0.838	-0.105	0.056	0.9	0.0582	6032	298	5734	-0.0585736	0.0615285	0.943109	0.341109	0.0921078	0.0630738	1.09648	0.144203
Type 1 diabetes with renal manifestations	endocrine/metabolic	250.12	logistic	20568	109	20459	0.02	0.096	1.02	0.839	0.023	0.096	1.023	0.813	5529	60	5469	0.221753	0.13651	1.24826	0.10428	0.2579	0.137899	1.29421	0.0614543
Sebaceous cyst	dermatologic	706.2	logistic	26194	273	25921	0.012	0.061	1.012	0.84	-0.045	0.061	0.956	0.457	8460	142	8318	-0.111894	0.0871617	0.894139	0.199229	0.146502	0.0884326	1.15778	0.0975903
Spondylosis and allied disorders	musculoskeletal	721	logistic	25718	1351	24367	-0.006	0.028	0.994	0.841	-0.054	0.028	0.948	0.0559	8691	682	8009	-0.0308949	0.0417802	0.969577	0.459627	-0.0578285	0.0422825	0.943812	0.171415
Chronic thyroiditis	endocrine/metabolic	245.2	logistic	22524	209	22315	-0.014	0.07	0.986	0.842	-0.04	0.07	0.961	0.571	8229	22	8207	0.123967	0.219414	1.13198	0.572081	0.439522	0.223833	1.55197	0.0495743
Type 1 diabetes	endocrine/metabolic	250.1	logistic	20859	400	20459	-0.01	0.051	0.99	0.842	-0.001	0.05	0.999	0.989	5719	250	5469	0.0656596	0.0677238	1.06786	0.332286	0.0741763	0.0683091	1.077	0.277527
Osteochondropathies	musculoskeletal	732	logistic	24875	21	24854	-0.043	0.218	0.958	0.842	-0.126	0.219	0.882	0.565	8163	10	8153	NA	NA	NA	NA	NA	NA	NA	NA
Specific nonpsychotic mental disorders due to brain damage	mental disorders	291.4	logistic	25463	58	25405	-0.026	0.132	0.974	0.844	0.112	0.131	1.118	0.394	8394	24	8370	0.242491	0.211975	1.27442	0.252639	0.0328942	0.212921	1.03344	0.877224
Portal hypertension	digestive	571.81	logistic	24549	171	24378	-0.015	0.077	0.985	0.844	-0.047	0.077	0.954	0.538	8217	42	8175	0.267876	0.163962	1.30718	0.102308	-0.0229677	0.164811	0.977294	0.889168
Inflammatory disease of cervix, vagina, and vulva	genitourinary	614.5	logistic	28223	143	28080	0.017	0.085	1.017	0.844	0.016	0.085	1.016	0.849	9027	511	8516	-0.023229	0.0501554	0.977039	0.643263	-0.0340901	0.0511239	0.966484	0.504892
Cystoid macular degeneration of retina	sense organs	362.23	logistic	26447	59	26388	-0.026	0.131	0.975	0.846	0.07	0.131	1.072	0.595	8286	53	8233	0.0571562	0.145574	1.05882	0.694595	0.17168	0.1483	1.1873	0.247007
ASCVD	circulatory system	414.2	logistic	20464	217	20247	-0.013	0.069	0.987	0.846	-0.003	0.07	0.997	0.971	7781	69	7712	0.14735	0.123973	1.15876	0.234613	0.21605	0.124951	1.24116	0.0837945
Psychosis	mental disorders	295.3	logistic	19310	46	19264	-0.028	0.148	0.972	0.848	0.17	0.148	1.186	0.251	5774	40	5734	0.0961295	0.16714	1.1009	0.565193	0.26797	0.169985	1.30731	0.114926
Facial nerve disorders [CN7]	neurological	352.2	logistic	26319	100	26219	-0.019	0.101	0.981	0.848	-0.013	0.1	0.987	0.9	8392	53	8339	0.0120523	0.138335	1.01213	0.930573	-0.031265	0.139694	0.969219	0.822905
Sciatica	symptoms	764	logistic	26040	667	25373	-0.008	0.04	0.992	0.848	0.05	0.039	1.052	0.201	8533	700	7833	-0.00876075	0.0412918	0.991278	0.831977	0.000199613	0.041945	1.0002	0.996203
Concussion	injuries & poisonings	817	logistic	28500	63	28437	-0.024	0.127	0.976	0.848	-0.066	0.127	0.937	0.605	9936	47	9889	0.0744183	0.148927	1.07726	0.617289	0.1743	0.151048	1.19041	0.248524
Other aneurysm	circulatory system	442	logistic	24606	1709	22897	-0.005	0.026	0.995	0.849	-0.004	0.025	0.996	0.872	8710	299	8411	-0.00832736	0.0611784	0.991707	0.89173	-0.0149094	0.0612952	0.985201	0.807821
Other specified diseases of the salivary glands	digestive	527.8	logistic	27056	38	27018	0.031	0.163	1.031	0.849	-0.066	0.162	0.936	0.686	9439	17	9422	NA	NA	NA	NA	NA	NA	NA	NA
Male infertility and abnormal spermatozoa	genitourinary	609	logistic	23875	94	23781	0.02	0.104	1.02	0.849	-0.065	0.103	0.937	0.532	8448	31	8417	-0.065029	0.189845	0.93704	0.731947	0.215764	0.186119	1.24081	0.246342
Enthesopathy	musculoskeletal	726.1	logistic	24145	672	23473	-0.008	0.039	0.993	0.849	-0.024	0.039	0.977	0.545	7199	466	6733	0.0417509	0.0505166	1.04263	0.408532	-0.0357725	0.0511947	0.96486	0.484706
Myelofibrosis	hematopoietic	289.1	logistic	23990	24	23966	0.039	0.203	1.039	0.85	-0.014	0.204	0.986	0.945	7966	2	7964	NA	NA	NA	NA	NA	NA	NA	NA
Primary pulmonary hypertension	circulatory system	415.21	logistic	25407	189	25218	-0.014	0.073	0.986	0.85	-0.063	0.073	0.939	0.391	8533	117	8416	-0.0304433	0.0962545	0.970015	0.75179	0.190002	0.0968632	1.20925	0.0498148
Mitral valve disease	circulatory system	394.2	logistic	22355	392	21963	-0.01	0.051	0.991	0.853	-0.025	0.051	0.975	0.622	8457	89	8368	-0.095398	0.109879	0.909011	0.385281	-0.130996	0.111583	0.877221	0.240402
Hypertensive heart disease	circulatory system	401.21	logistic	13808	369	13439	0.01	0.053	1.01	0.855	0.025	0.054	1.025	0.651	3869	382	3487	0.0879448	0.0633001	1.09193	0.164732	0.0625356	0.0665471	1.06453	0.347361
Genital prolapse	genitourinary	618	logistic	28900	271	28629	-0.011	0.062	0.989	0.855	-0.065	0.062	0.937	0.295	10178	106	10072	-0.0026205	0.101082	0.997383	0.979318	-0.0222486	0.102011	0.977997	0.827351
Disorders of protein plasma/amino-acid transport and metabolism	endocrine/metabolic	270	logistic	27853	342	27511	0.01	0.055	1.01	0.856	0.034	0.054	1.035	0.53	9231	178	9053	-0.069968	0.078847	0.932424	0.374869	0.103983	0.0792253	1.10958	0.189352
Polycythemia, secondary	hematopoietic	289.8	logistic	23819	49	23770	0.026	0.143	1.026	0.856	-0.085	0.143	0.919	0.552	7909	12	7897	NA	NA	NA	NA	NA	NA	NA	NA
Hemorrhage of gastrointestinal tract	digestive	578.9	logistic	25963	306	25657	-0.01	0.058	0.99	0.857	0.006	0.057	1.006	0.911	8512	233	8279	-0.0121894	0.0695607	0.987885	0.860896	0.116111	0.0705671	1.12312	0.0998878
Osteoarthrosis	musculoskeletal	740	logistic	26922	3198	23724	-0.003	0.019	0.997	0.857	-0.011	0.019	0.989	0.565	9307	2347	6960	-0.0146347	0.0267458	0.985472	0.584257	-0.0148669	0.0270438	0.985243	0.5825
Eustachian tube disorders	sense organs	381.2	logistic	27098	93	27005	0.019	0.105	1.019	0.858	0.113	0.104	1.12	0.275	9111	62	9049	0.150791	0.13288	1.16275	0.256462	0.0668369	0.135078	1.06912	0.620739
Non-proliferative glomerulonephritis	genitourinary	580.12	logistic	21510	73	21437	0.021	0.118	1.021	0.858	0.174	0.118	1.19	0.139	6288	55	6233	0.00343998	0.14076	1.00345	0.980503	0.285153	0.144286	1.32997	0.0481203
Renal dialysis	genitourinary	585.31	logistic	21802	365	21437	-0.01	0.053	0.991	0.858	0.041	0.053	1.042	0.434	6886	653	6233	0.0182714	0.0438881	1.01844	0.677177	0.0566829	0.0447126	1.05832	0.204899
Psoriatic arthropathy	dermatologic	696.42	logistic	23854	121	23733	-0.016	0.092	0.984	0.859	0.007	0.091	1.007	0.94	7770	10	7760	NA	NA	NA	NA	NA	NA	NA	NA
Secondary/extrinsic cardiomyopathies	circulatory system	425.2	logistic	24886	354	24532	0.009	0.054	1.009	0.86	-0.078	0.054	0.925	0.146	8819	187	8632	0.0130457	0.0768938	1.01313	0.865279	0.226955	0.0779791	1.25477	0.00360901
Dependence on respirator [Ventilator] or supplemental oxygen	respiratory	509.8	logistic	24308	298	24010	-0.01	0.058	0.99	0.86	0.069	0.058	1.071	0.238	8353	193	8160	0.0354452	0.0748108	1.03608	0.635644	-0.0652363	0.0757299	0.936846	0.388999
Deficiency anemias	hematopoietic	281.9	logistic	20107	26	20081	-0.035	0.198	0.966	0.861	-0.058	0.196	0.944	0.767	5217	16	5201	NA	NA	NA	NA	NA	NA	NA	NA
Other cardiomyopathy	circulatory system	425.8	logistic	24563	31	24532	0.031	0.18	1.031	0.864	-0.214	0.182	0.808	0.241	8649	17	8632	NA	NA	NA	NA	NA	NA	NA	NA
Derangement of joint, non-traumatic	musculoskeletal	742	logistic	27112	296	26816	0.01	0.059	1.01	0.864	0.028	0.059	1.028	0.638	8575	176	8399	-0.0219678	0.0776028	0.978272	0.777116	-0.0343394	0.0789803	0.966244	0.663719
Other dyspnea	respiratory	512.9	logistic	19753	2100	17653	0.004	0.023	1.004	0.865	-0.02	0.023	0.98	0.389	5789	1365	4424	0.0341238	0.033066	1.03471	0.302077	0.0023429	0.0335878	1.00235	0.944389
Rash and other nonspecific skin eruption	dermatologic	687.1	logistic	24058	556	23502	-0.007	0.043	0.993	0.865	-0.052	0.043	0.949	0.226	7065	560	6505	0.0435495	0.0460258	1.04451	0.344047	0.0317007	0.0462915	1.03221	0.493467
Altered mental status	mental disorders	292.4	logistic	25765	360	25405	-0.009	0.053	0.991	0.866	-0.033	0.053	0.967	0.531	8638	268	8370	0.0751039	0.0654386	1.078	0.251093	0.125154	0.0662261	1.13332	0.0587859
Liver abscess and sequelae of chronic liver disease	digestive	571.8	logistic	24770	392	24378	0.009	0.051	1.009	0.867	-0.055	0.051	0.947	0.28	8280	105	8175	0.19589	0.103155	1.21639	0.0575651	0.0670574	0.10381	1.06936	0.518304
Decubitus ulcer	dermatologic	707.1	logistic	28430	278	28152	-0.01	0.06	0.99	0.868	-0.042	0.06	0.958	0.482	9811	115	9696	-0.0123856	0.0967524	0.987691	0.898138	-0.0331132	0.0976017	0.967429	0.734407
Rupture of synovium	musculoskeletal	727.5	logistic	23516	43	23473	-0.025	0.153	0.975	0.868	0.242	0.153	1.273	0.114	6771	38	6733	0.124118	0.169951	1.13215	0.465196	0.0735074	0.175032	1.07628	0.674511
Osteopenia or other disorder of bone and cartilage	musculoskeletal	743.9	logistic	26564	770	25794	-0.006	0.038	0.994	0.87	0.014	0.038	1.014	0.71	9439	208	9231	-0.00110662	0.0730824	0.998894	0.987919	0.148538	0.0749196	1.16014	0.0474091
Lung disease due to external agents	respiratory	500	logistic	24126	116	24010	-0.015	0.093	0.985	0.871	-0.008	0.093	0.992	0.931	8182	22	8160	-0.224931	0.21462	0.798572	0.29462	-0.102855	0.216195	0.902258	0.634253
Colorectal cancer	neoplasms	153	logistic	24752	628	24124	-0.006	0.04	0.994	0.873	0.002	0.04	1.002	0.953	8089	160	7929	-0.0116495	0.0811564	0.988418	0.885861	-0.208914	0.082591	0.811465	0.0114224
Acute and subacute necrosis of liver	digestive	573.4	logistic	24400	22	24378	0.034	0.213	1.035	0.873	0.438	0.213	1.55	0.0391	8189	14	8175	NA	NA	NA	NA	NA	NA	NA	NA
Coronary atherosclerosis	circulatory system	411.4	logistic	26234	5987	20247	0.003	0.017	1.003	0.874	-0.026	0.017	0.975	0.124	9102	1390	7712	0.0797731	0.0321311	1.08304	0.0130376	0.0194481	0.0323127	1.01964	0.54726
Atherosclerosis of the extremities	circulatory system	440.2	logistic	23297	400	22897	0.008	0.051	1.008	0.874	-0.077	0.05	0.926	0.129	8632	221	8411	0.0166972	0.0713949	1.01684	0.815085	0.0267697	0.0723902	1.02713	0.711534
Complication of internal orthopedic device	injuries & poisonings	858	logistic	24589	299	24290	0.009	0.058	1.009	0.875	0.043	0.058	1.044	0.465	8603	181	8422	0.100921	0.0785496	1.10619	0.198862	-0.0064256	0.0785135	0.993595	0.934773
Gram positive septicemia	infectious diseases	38.2	logistic	25272	24	25248	0.032	0.203	1.032	0.876	-0.323	0.203	0.724	0.111	8173	14	8159	NA	NA	NA	NA	NA	NA	NA	NA
Central origin vertigo	sense organs	386.21	logistic	24284	22	24262	-0.033	0.216	0.967	0.877	-0.049	0.216	0.952	0.819	7632	6	7626	NA	NA	NA	NA	NA	NA	NA	NA
Megaloblastic anemia	hematopoietic	281.1	logistic	20183	102	20081	-0.015	0.1	0.985	0.878	0.169	0.1	1.184	0.0899	5284	83	5201	-0.0404733	0.115299	0.960335	0.725567	-0.0591473	0.117449	0.942568	0.614544
Mitral valve stenosis and aortic valve stenosis	circulatory system	394.1	logistic	22114	151	21963	0.012	0.082	1.012	0.881	-0.043	0.083	0.957	0.599	8399	31	8368	0.118364	0.185112	1.12565	0.52255	0.193586	0.188375	1.21359	0.304109
Cerebral ischemia	circulatory system	433.3	logistic	25793	1162	24631	0.005	0.03	1.005	0.881	-0.05	0.03	0.951	0.0994	9277	629	8648	-0.0148742	0.0432017	0.985236	0.730623	0.0714337	0.0435657	1.07405	0.101072
H. pylori	infectious diseases	41.8	logistic	25273	25	25248	0.03	0.201	1.03	0.882	0.099	0.201	1.104	0.623	8235	76	8159	0.133589	0.119773	1.14292	0.2647	-0.207003	0.122491	0.813017	0.0910372
Paralysis/spasm of vocal cords or larynx	respiratory	473.3	logistic	21948	165	21783	-0.012	0.079	0.988	0.882	0.114	0.078	1.121	0.143	6205	44	6161	-0.104326	0.153063	0.900932	0.495498	-0.000845971	0.153288	0.999154	0.995597
Chronic Kidney Disease, Stage III	genitourinary	585.33	logistic	22679	1242	21437	0.004	0.03	1.004	0.882	-0.033	0.03	0.968	0.275	7070	837	6233	0.0296927	0.040904	1.03014	0.467892	0.0405439	0.0413893	1.04138	0.327296
Nonspecific elevation of levels of transaminase or lactic acid dehydrogenase [LDH]	digestive	573.6	logistic	24631	253	24378	-0.009	0.063	0.991	0.883	0.036	0.063	1.037	0.567	8318	143	8175	0.0658888	0.0863287	1.06811	0.445325	-0.158538	0.0876897	0.85339	0.070615
Muscle weakness	symptoms	772.3	logistic	27226	192	27034	-0.011	0.073	0.989	0.883	0.031	0.073	1.031	0.67	8890	105	8785	-0.0451691	0.102783	0.955836	0.660329	-0.148607	0.103075	0.861908	0.149378
Gram negative septicemia	infectious diseases	38.1	logistic	25319	71	25248	-0.017	0.118	0.983	0.885	0.124	0.119	1.133	0.295	8222	63	8159	-0.0204277	0.131677	0.97978	0.876715	0.0173686	0.133678	1.01752	0.896623
Tension headache	mental disorders	306.9	logistic	19312	48	19264	0.021	0.145	1.021	0.885	-0.062	0.146	0.94	0.671	5775	41	5734	0.119499	0.164152	1.12693	0.466626	-0.0510273	0.168785	0.950253	0.762407
Chromosomal anomalies and genetic disorders	congenital anomalies	758	logistic	28396	60	28336	0.019	0.13	1.019	0.885	0.201	0.13	1.222	0.121	9982	11	9971	NA	NA	NA	NA	NA	NA	NA	NA
Other endocrine disorders	endocrine/metabolic	259	logistic	25932	87	25845	-0.015	0.108	0.985	0.887	0.017	0.108	1.017	0.874	8631	36	8595	-0.0251925	0.172637	0.975122	0.883979	-0.11904	0.175934	0.887772	0.498648
Cirrhosis of liver without mention of alcohol	digestive	571.51	logistic	24956	578	24378	0.006	0.042	1.006	0.887	-0.053	0.042	0.948	0.203	8466	291	8175	0.0349751	0.0621034	1.03559	0.573315	0.0191606	0.0632264	1.01935	0.761854
Acute and chronic tonsillitis	respiratory	474	logistic	21920	137	21783	-0.012	0.087	0.988	0.888	0.048	0.085	1.049	0.574	6256	95	6161	-0.0344338	0.107333	0.966152	0.748351	-0.0933483	0.110356	0.910876	0.397619
Poisoning/allergy of sulfonamides	injuries & poisonings	961.1	logistic	22734	106	22628	0.014	0.098	1.014	0.888	0.094	0.098	1.099	0.336	7618	57	7561	0.0896441	0.142842	1.09378	0.530283	-0.0401142	0.146075	0.96068	0.783614
Breast disorder NOS	genitourinary	613.9	logistic	28117	33	28084	-0.025	0.176	0.976	0.889	-0.13	0.176	0.878	0.461	9374	9	9365	NA	NA	NA	NA	NA	NA	NA	NA
Other derangement of joint	musculoskeletal	742.9	logistic	27070	254	26816	0.009	0.063	1.009	0.889	0.065	0.063	1.068	0.302	8554	155	8399	-0.0343951	0.0822568	0.96619	0.675843	-0.00876987	0.0838699	0.991268	0.916721
Malignant neoplasm of gallbladder and extrahepatic bile ducts	neoplasms	159.3	logistic	25987	34	25953	0.024	0.171	1.024	0.89	-0.23	0.171	0.795	0.179	9438	9	9429	NA	NA	NA	NA	NA	NA	NA	NA
Hepatitis NOS	infectious diseases	70.9	logistic	24812	93	24719	0.014	0.104	1.014	0.892	0.28	0.103	1.323	0.00691	7289	33	7256	0.211265	0.176351	1.23524	0.230925	-0.0301372	0.18432	0.970312	0.870121
Irregular menstrual cycle	genitourinary	626.13	logistic	25614	227	25387	0.009	0.069	1.009	0.892	-0.107	0.069	0.899	0.12	7590	170	7420	-0.115328	0.0808334	0.891074	0.153655	0.0334816	0.0839343	1.03405	0.689965
Barrett's esophagus	digestive	530.13	logistic	18804	313	18491	-0.008	0.057	0.992	0.894	0.016	0.057	1.016	0.782	5752	29	5723	0.227441	0.190021	1.25538	0.231334	0.0429022	0.196201	1.04384	0.826911
Dermatomyositis	dermatologic	709.5	logistic	23916	34	23882	-0.023	0.172	0.977	0.894	0.216	0.172	1.241	0.209	7946	18	7928	NA	NA	NA	NA	NA	NA	NA	NA
Degenerative disease of the spinal cord	neurological	334	logistic	25149	169	24980	-0.01	0.077	0.99	0.895	-0.08	0.077	0.923	0.303	8455	86	8369	0.0519231	0.112563	1.05329	0.644597	-0.248255	0.114916	0.780161	0.030748
Other disorders of the kidney and ureters	genitourinary	586	logistic	22685	1248	21437	-0.004	0.03	0.996	0.895	0.001	0.03	1.001	0.96	6857	624	6233	0.0259308	0.0451709	1.02627	0.565928	0.0320167	0.0457814	1.03253	0.48434
Acute pharyngitis	respiratory	465.2	logistic	24536	284	24252	0.008	0.06	1.008	0.896	0.065	0.06	1.067	0.273	7059	239	6820	0.162376	0.0680758	1.1763	0.0170691	-0.0880908	0.0693418	0.915678	0.203947
Other specified congenital anomalies of kidney	congenital anomalies	751.22	logistic	28262	43	28219	0.02	0.154	1.02	0.896	-0.087	0.152	0.917	0.569	9925	11	9914	NA	NA	NA	NA	NA	NA	NA	NA
Aplastic anemia	hematopoietic	284	logistic	20363	282	20081	0.008	0.06	1.008	0.897	-0.003	0.06	0.997	0.965	5287	86	5201	-0.0354071	0.112668	0.965212	0.753323	-0.164846	0.113295	0.848024	0.145667
Suicidal ideation	mental disorders	297.1	logistic	19302	38	19264	0.021	0.163	1.021	0.898	-0.258	0.161	0.773	0.11	5787	53	5734	0.182762	0.146213	1.20053	0.211311	0.213664	0.147929	1.23821	0.148635
Rheumatic disease of the heart valves	circulatory system	394	logistic	23186	1223	21963	0.004	0.03	1.004	0.899	-0.031	0.03	0.97	0.306	8680	312	8368	-0.0644284	0.0599935	0.937603	0.282857	0.0256771	0.0605328	1.02601	0.67143
Chromosomal anomalies	congenital anomalies	758.1	logistic	28357	21	28336	-0.028	0.219	0.973	0.9	0.329	0.217	1.389	0.13	9975	4	9971	NA	NA	NA	NA	NA	NA	NA	NA
Viral hepatitis C	infectious diseases	70.3	logistic	25161	442	24719	-0.006	0.048	0.994	0.901	-0.005	0.048	0.995	0.923	7725	469	7256	0.00194419	0.0498653	1.00195	0.968899	0.083373	0.0502315	1.08695	0.0969597
Pneumonitis due to inhalation of food or vomitus	respiratory	501	logistic	24114	104	24010	-0.012	0.098	0.988	0.901	-0.086	0.098	0.917	0.377	8192	32	8160	0.149333	0.176909	1.16106	0.3986	-0.19932	0.181357	0.819288	0.271747
Primary thrombocytopenia	hematopoietic	287.31	logistic	20808	67	20741	0.015	0.123	1.015	0.902	-0.028	0.122	0.973	0.822	7996	23	7973	0.0528409	0.222304	1.05426	0.812116	0.154297	0.227109	1.16684	0.496886
Mental disorders durring/after pregnancy	mental disorders	306.1	logistic	19381	117	19264	-0.012	0.094	0.988	0.902	0.02	0.096	1.02	0.837	5874	140	5734	0.0424612	0.0944387	1.04338	0.652987	0.213366	0.0945347	1.23784	0.0240073
Osteoarthrosis, localized, secondary	musculoskeletal	740.12	logistic	23800	76	23724	-0.014	0.116	0.986	0.903	0.124	0.115	1.132	0.279	7027	67	6960	0.075406	0.126212	1.07832	0.550205	-0.00765511	0.128078	0.992374	0.95234
Cerebral edema and compression of brain	neurological	348.2	logistic	25146	166	24980	-0.009	0.078	0.991	0.904	0.002	0.078	1.002	0.978	8472	103	8369	0.0675071	0.101708	1.06984	0.506862	-0.119312	0.103369	0.887531	0.248406
Right bundle branch block	circulatory system	426.31	logistic	15610	448	15162	-0.006	0.049	0.994	0.904	-0.078	0.048	0.925	0.108	5401	110	5291	-0.00692277	0.0974816	0.993101	0.943385	-0.128409	0.0991239	0.879493	0.195167
Cancer of nasopharynx	neoplasms	149.2	logistic	28357	20	28337	-0.027	0.225	0.974	0.905	-0.358	0.225	0.699	0.112	10170	3	10167	NA	NA	NA	NA	NA	NA	NA	NA
Bronchiectasis	respiratory	496.3	logistic	23148	225	22923	-0.008	0.067	0.992	0.905	-0.113	0.067	0.894	0.0933	7091	49	7042	-0.0886169	0.145321	0.915196	0.541993	-0.223223	0.14913	0.799937	0.134436
Bronchitis	respiratory	497	logistic	23036	113	22923	0.011	0.094	1.011	0.905	-0.014	0.094	0.986	0.883	7096	54	7042	0.111575	0.143538	1.11804	0.436969	0.12208	0.143337	1.12984	0.39438
Gastritis and duodenitis, NOS	digestive	535.9	logistic	26173	80	26093	0.013	0.112	1.013	0.906	-0.022	0.112	0.978	0.844	8550	127	8423	0.0444454	0.0917762	1.04545	0.628187	-0.081976	0.0925543	0.921294	0.375776
Sexual and gender identity disorders	mental disorders	302	logistic	19365	101	19264	0.012	0.1	1.012	0.907	-0.114	0.1	0.892	0.254	5789	55	5734	-0.139389	0.144904	0.869889	0.33608	-0.134552	0.144194	0.874107	0.35075
Coma	neurological	348.7	logistic	25344	364	24980	0.006	0.053	1.006	0.907	-0.016	0.053	0.984	0.767	8650	281	8369	-0.00454764	0.0630695	0.995463	0.942518	-0.0746627	0.0639722	0.928056	0.243166
Splenomegaly	digestive	579.2	logistic	25748	91	25657	0.012	0.105	1.012	0.907	-0.199	0.105	0.819	0.0569	8294	15	8279	NA	NA	NA	NA	NA	NA	NA	NA
Cardiac arrest and ventricular fibrillation	circulatory system	427.4	logistic	15458	296	15162	-0.007	0.059	0.993	0.908	0.001	0.058	1.001	0.984	5437	146	5291	0.00720077	0.0865313	1.00723	0.93368	0.004065	0.0877138	1.00407	0.963036
Other complications of pregnancy NEC	pregnancy complications	646	logistic	28829	247	28582	0.008	0.067	1.008	0.91	-0.036	0.067	0.965	0.589	9974	420	9554	0.01623	0.0577386	1.01636	0.778638	-0.00748241	0.0592258	0.992546	0.899465
Abnormality of organs and soft tissues of pelvis complicating pregnancy, childbirth, or the puerperium	pregnancy complications	654.1	logistic	28595	134	28461	0.01	0.088	1.01	0.912	-0.083	0.089	0.92	0.349	9763	219	9544	0.0189659	0.0743997	1.01915	0.798786	0.0261167	0.0761455	1.02646	0.731611
Orthostatic hypotension	circulatory system	458.1	logistic	23891	174	23717	0.008	0.076	1.008	0.914	-0.075	0.076	0.928	0.324	7529	69	7460	0.195998	0.124201	1.21652	0.114549	-0.129786	0.124556	0.878283	0.297414
Aphasia/speech disturbance	mental disorders	292.1	logistic	25666	261	25405	-0.007	0.062	0.993	0.915	-0.171	0.062	0.843	0.00588	8568	198	8370	0.126085	0.0753974	1.13438	0.0944693	0.0568864	0.0760155	1.05854	0.454247
Astigmatism	sense organs	367.2	logistic	26725	342	26383	0.006	0.055	1.006	0.916	0.009	0.055	1.009	0.863	8409	184	8225	0.0754961	0.0764456	1.07842	0.323359	-0.0416111	0.0780551	0.959243	0.593965
Visual disturbances	sense organs	368	logistic	27725	727	26998	-0.004	0.038	0.996	0.916	0.015	0.038	1.015	0.684	9218	560	8658	0.0310625	0.0454523	1.03155	0.494349	-0.010519	0.0460033	0.989536	0.819135
Need for Hormone replacement therapy (postmenopausal)	genitourinary	627.22	logistic	25429	42	25387	0.016	0.157	1.017	0.916	0.049	0.156	1.05	0.756	7424	4	7420	NA	NA	NA	NA	NA	NA	NA	NA
Spondylosis without myelopathy	musculoskeletal	721.1	logistic	25543	1176	24367	0.003	0.03	1.003	0.916	-0.058	0.03	0.943	0.0521	8599	590	8009	-0.00865464	0.044452	0.991383	0.845631	-0.052946	0.0450748	0.948431	0.240145
Appendiceal conditions	digestive	540	logistic	29073	120	28953	-0.01	0.092	0.99	0.917	-0.111	0.092	0.895	0.228	10263	53	10210	0.154887	0.14549	1.16753	0.287063	-0.126857	0.146394	0.880859	0.38619
Crystal arthropathies	endocrine/metabolic	274.2	logistic	27286	30	27256	0.019	0.185	1.019	0.918	0.395	0.185	1.485	0.033	9362	35	9327	0.209256	0.174047	1.23276	0.229251	0.0384789	0.178403	1.03923	0.829233
Epilepsy, recurrent seizures, convulsions	neurological	345	logistic	25735	755	24980	-0.004	0.037	0.996	0.918	-0.037	0.037	0.964	0.32	8808	439	8369	0.00652925	0.0502043	1.00655	0.896524	-0.00919046	0.0508331	0.990852	0.856527
Neoplasm of uncertain behavior	neoplasms	199	logistic	24390	963	23427	0.003	0.033	1.003	0.919	-0.026	0.033	0.974	0.431	9166	240	8926	-0.0115724	0.0672198	0.988494	0.863313	-0.0864697	0.0680286	0.917163	0.2037
Other disorders of neurohypophysis	endocrine/metabolic	253.7	logistic	25868	23	25845	0.021	0.208	1.021	0.92	0.071	0.208	1.074	0.732	8602	7	8595	NA	NA	NA	NA	NA	NA	NA	NA
Hereditary hemolytic anemias	hematopoietic	282	logistic	20144	63	20081	-0.013	0.129	0.987	0.92	-0.124	0.128	0.884	0.334	5503	302	5201	0.0864379	0.063895	1.09028	0.176116	0.0990236	0.063296	1.10409	0.117711
Nervous system congenital anomalies	congenital anomalies	752	logistic	28871	67	28804	0.012	0.123	1.012	0.92	-0.238	0.123	0.788	0.0524	10168	23	10145	-0.146677	0.208933	0.863573	0.482661	-0.384062	0.21449	0.681089	0.0733607
GERD	digestive	530.11	logistic	23134	4643	18491	0.002	0.017	1.002	0.921	-0.024	0.017	0.976	0.139	8123	2400	5723	0.0200921	0.0259781	1.0203	0.43927	-0.00405234	0.0262652	0.995956	0.877384
Dermatophytosis of the body	infectious diseases	110.13	logistic	25725	52	25673	-0.014	0.139	0.987	0.922	-0.032	0.138	0.969	0.817	7677	40	7637	0.0591162	0.164123	1.0609	0.718702	0.095263	0.162481	1.09995	0.557672
Orchitis and epididymitis	genitourinary	601.3	logistic	24012	55	23957	0.013	0.134	1.013	0.922	-0.195	0.136	0.823	0.152	8879	40	8839	0.29606	0.170945	1.34455	0.0832912	-0.0299653	0.168044	0.970479	0.858473
Althete's foot	infectious diseases	110.12	logistic	25749	76	25673	0.011	0.115	1.011	0.923	-0.073	0.114	0.929	0.521	7727	90	7637	-0.0558801	0.112074	0.945653	0.618061	-0.168073	0.111723	0.845292	0.132486
Lyme disease	infectious diseases	130.1	logistic	27775	74	27701	0.011	0.116	1.011	0.925	0.053	0.116	1.055	0.647	9168	NA	NA	NA	NA	NA	NA	NA	NA	NA	NA
Disorders of adrenal glands	endocrine/metabolic	255	logistic	26185	340	25845	0.005	0.055	1.005	0.925	0.08	0.055	1.083	0.145	8768	173	8595	0.0921093	0.0793829	1.09648	0.24592	-0.0460539	0.0799334	0.95499	0.564511
Pulmonary collapse; interstitial and compensatory emphysema	respiratory	508	logistic	24188	178	24010	0.007	0.075	1.007	0.925	0.2	0.075	1.222	0.00784	8260	100	8160	0.114719	0.10291	1.12156	0.264956	0.159519	0.103599	1.17295	0.123615
Cervical intraepithelial neoplasia [CIN] [Cervical dysplasia]	neoplasms	180.3	logistic	24117	114	24003	-0.009	0.095	0.991	0.926	0.111	0.095	1.118	0.242	7403	149	7254	-0.0979455	0.0865352	0.906698	0.257695	-0.0630233	0.0892898	0.938922	0.480295
Viral hepatitis B	infectious diseases	70.2	logistic	24776	57	24719	-0.012	0.133	0.988	0.927	-0.149	0.132	0.861	0.259	7359	103	7256	0.290434	0.10802	1.33701	0.00717308	0.0968557	0.110556	1.1017	0.380989
Endocarditis	circulatory system	420.3	logistic	24735	203	24532	-0.006	0.071	0.994	0.928	0.104	0.071	1.109	0.141	8699	67	8632	-0.111996	0.125593	0.894048	0.372534	0.0803669	0.12693	1.08368	0.52663
Disturbance of salivary secretion	digestive	527.7	logistic	27334	316	27018	0.005	0.057	1.005	0.929	0.006	0.057	1.006	0.919	9480	58	9422	-0.226447	0.132891	0.797361	0.08838	-0.137122	0.135205	0.871864	0.310499
Ventral hernia	digestive	550.5	logistic	25640	359	25281	0.005	0.053	1.005	0.929	0.027	0.053	1.027	0.612	8944	185	8759	0.121354	0.0754277	1.12902	0.107643	-0.0404395	0.0768897	0.960367	0.598929
Systemic inflammatory response syndrome (SIRS)	injuries & poisonings	994.1	logistic	27067	43	27024	0.014	0.153	1.014	0.929	-0.184	0.152	0.832	0.227	9243	49	9194	0.290386	0.15082	1.33694	0.0541812	0.0264291	0.15154	1.02678	0.861548
Candidiasis of skin and nails	infectious diseases	112.3	logistic	25695	22	25673	-0.019	0.216	0.981	0.93	0.107	0.213	1.113	0.616	7679	42	7637	-0.272584	0.161163	0.76141	0.0907697	-0.029834	0.16199	0.970607	0.853878
Deficiency of humoral immunity	endocrine/metabolic	279.11	logistic	27063	174	26889	0.007	0.076	1.007	0.93	-0.013	0.076	0.987	0.864	9270	14	9256	NA	NA	NA	NA	NA	NA	NA	NA
Complications of gastrostomy, colostomy and enterostomy	digestive	536.7	logistic	26147	54	26093	-0.012	0.137	0.988	0.93	0.089	0.136	1.093	0.513	8436	13	8423	NA	NA	NA	NA	NA	NA	NA	NA
Cerebrovascular disease	circulatory system	433	logistic	27485	2854	24631	-0.002	0.02	0.998	0.931	-0.027	0.02	0.974	0.188	9779	1131	8648	-0.00767063	0.033414	0.992359	0.818431	0.0282035	0.0337347	1.02861	0.403133
Polycythemia vera	neoplasms	200.1	logistic	25383	42	25341	0.013	0.155	1.013	0.932	-0.01	0.153	0.99	0.947	8750	5	8745	NA	NA	NA	NA	NA	NA	NA	NA
Phlebitis and thrombophlebitis	circulatory system	451	logistic	19930	91	19839	0.009	0.105	1.009	0.932	-0.163	0.105	0.85	0.12	6556	66	6490	-0.234591	0.127354	0.790894	0.0654704	0.050839	0.129791	1.05215	0.69528
Chronic venous insufficiency [CVI]	circulatory system	456	logistic	20118	279	19839	-0.005	0.061	0.995	0.932	0.011	0.06	1.011	0.85	6598	108	6490	-0.113172	0.100697	0.892997	0.26106	-0.0186786	0.10224	0.981495	0.855038
Other disorders of ear	sense organs	388	logistic	25776	106	25670	-0.008	0.098	0.992	0.933	0.006	0.098	1.006	0.951	9097	49	9048	0.100398	0.145989	1.10561	0.491635	0.187825	0.147945	1.20662	0.204242
Other disorders of biliary tract	digestive	575.8	logistic	27540	107	27433	-0.008	0.097	0.992	0.934	0.079	0.097	1.082	0.42	9519	25	9494	0.0828979	0.202165	1.08643	0.681769	0.476398	0.202525	1.61026	0.0186582
Pulmonary embolism and infarction, acute	circulatory system	415.11	logistic	25660	442	25218	0.004	0.048	1.004	0.936	-0.007	0.048	0.993	0.891	8754	338	8416	0.0083146	0.0572019	1.00835	0.88443	0.105408	0.0576543	1.11116	0.0675093
Swelling of limb	symptoms	771.1	logistic	26687	510	26177	-0.004	0.045	0.996	0.936	-0.043	0.045	0.958	0.338	8201	607	7594	-0.0254732	0.0442379	0.974848	0.564734	-0.0192451	0.0446789	0.980939	0.666656
Fracture of ankle and foot	injuries & poisonings	801	logistic	27109	251	26858	0.005	0.064	1.005	0.936	0.027	0.064	1.028	0.668	9292	212	9080	0.0831745	0.0711554	1.08673	0.242439	0.0587674	0.0722211	1.06053	0.415808
Malaise and fatigue	symptoms	798	logistic	24530	3846	20684	0.001	0.018	1.001	0.938	-0.009	0.018	0.991	0.625	8460	1735	6725	0.0298072	0.0283086	1.03026	0.292369	0.0174773	0.0288472	1.01763	0.544611
Breast conditions, congenital or relating to hormones	genitourinary	612	logistic	26694	109	26585	-0.007	0.097	0.993	0.939	0.068	0.096	1.07	0.479	8512	99	8413	-0.134641	0.10564	0.87403	0.202478	-0.0555179	0.106689	0.945995	0.602807
Infectious and parasitic complications affecting pregnancy	pregnancy complications	647	logistic	28978	37	28941	-0.013	0.167	0.987	0.939	-0.056	0.168	0.945	0.738	9951	178	9773	0.0550503	0.0854658	1.05659	0.519497	0.0145418	0.0855347	1.01465	0.865002
Ill-defined descriptions and complications of heart disease	circulatory system	429	logistic	22630	1564	21066	0.002	0.027	1.002	0.94	0.016	0.027	1.016	0.549	8033	516	7517	-0.073708	0.0476361	0.928943	0.121788	0.0830091	0.0480279	1.08655	0.0839253
Hypertrophy of breast (Gynecomastia)	genitourinary	612.2	logistic	26673	88	26585	-0.008	0.108	0.992	0.94	0.077	0.107	1.08	0.473	8480	67	8413	-0.122106	0.12843	0.885055	0.341725	0.015645	0.129385	1.01577	0.903755
Elevated prostate specific antigen [PSA]	genitourinary	796	logistic	24872	915	23957	0.003	0.035	1.003	0.94	-0.012	0.035	0.988	0.739	9200	361	8839	-0.112767	0.0641604	0.893358	0.0788183	-0.0236208	0.0626747	0.976656	0.706264
Fracture of neck of femur	injuries & poisonings	800.1	logistic	26954	96	26858	-0.008	0.102	0.993	0.941	-0.026	0.103	0.974	0.798	9110	30	9080	0.120757	0.187955	1.12835	0.520564	-0.183475	0.19153	0.832373	0.338091
Muscular wasting and disuse atrophy	symptoms	772.1	logistic	27067	33	27034	-0.013	0.175	0.987	0.942	0.152	0.174	1.164	0.383	8798	13	8785	NA	NA	NA	NA	NA	NA	NA	NA
Abnormal movement	neurological	350	logistic	27279	1247	26032	0.002	0.029	1.002	0.943	-0.043	0.029	0.958	0.139	9237	607	8630	-0.0391402	0.0439405	0.961616	0.373061	-0.00710033	0.0440895	0.992925	0.872059
Malignant neoplasm of rectum, rectosigmoid junction, and anus	neoplasms	153.3	logistic	24391	267	24124	0.004	0.061	1.004	0.945	0.034	0.061	1.035	0.576	7997	68	7929	0.030873	0.124761	1.03135	0.804555	-0.168896	0.126808	0.844597	0.182893
Nerve root and plexus disorders	neurological	353	logistic	26308	89	26219	0.007	0.106	1.007	0.946	-0.118	0.106	0.889	0.266	8374	35	8339	0.0121971	0.173241	1.01227	0.943871	-0.0349506	0.178484	0.965653	0.844752
Other disorders of lipoid metabolism	endocrine/metabolic	277.5	logistic	27414	186	27228	-0.005	0.074	0.995	0.947	0.107	0.074	1.113	0.146	9481	43	9438	0.206492	0.157415	1.22936	0.189597	-0.0421173	0.157911	0.958757	0.789688
Other symptoms of respiratory system	respiratory	512	logistic	24522	6869	17653	0.001	0.014	1.001	0.947	-0.01	0.014	0.99	0.502	8503	4079	4424	0.0354087	0.0230404	1.03604	0.12434	-0.0114603	0.0233642	0.988605	0.623776
Type 1 diabetes with ophthalmic manifestations	endocrine/metabolic	250.13	logistic	20556	97	20459	-0.007	0.102	0.993	0.948	0.025	0.101	1.025	0.809	5526	57	5469	0.130062	0.141965	1.1389	0.359585	0.125106	0.143664	1.13327	0.383851
Disorders of other cranial nerves	neurological	352	logistic	26418	199	26219	0.005	0.072	1.005	0.948	0.081	0.071	1.084	0.257	8428	89	8339	-0.00175793	0.108057	0.998244	0.98702	-0.0414355	0.109645	0.959411	0.705499
Toxic effect of other substances, chiefly nonmedicinal as to source	injuries & poisonings	989	logistic	28935	82	28853	0.007	0.111	1.007	0.949	0.071	0.111	1.073	0.524	10003	118	9885	-0.185256	0.0963828	0.830891	0.0545945	0.0336786	0.0974247	1.03425	0.729577
Other disorders of pancreatic internal secretion	endocrine/metabolic	251	logistic	25945	100	25845	-0.006	0.1	0.994	0.95	-0.016	0.1	0.984	0.876	8665	70	8595	0.283109	0.127335	1.32725	0.0261924	0.113407	0.127021	1.12009	0.371956
Bundle branch block	circulatory system	426.3	logistic	16262	1100	15162	0.002	0.032	1.002	0.953	-0.021	0.032	0.979	0.512	5570	279	5291	0.000197914	0.0644174	1.0002	0.997549	-0.0425363	0.0647968	0.958356	0.51153
Blindness and low vision	sense organs	367.9	logistic	26549	166	26383	-0.005	0.078	0.995	0.954	0.113	0.078	1.12	0.146	8349	124	8225	0.135715	0.0951726	1.14536	0.153872	0.0883987	0.0969033	1.09242	0.361644
Acute, but ill-defined cerebrovascular disease	circulatory system	433.6	logistic	24679	48	24631	-0.008	0.145	0.992	0.956	-0.05	0.144	0.952	0.731	8687	39	8648	-0.0976208	0.165518	0.906993	0.555331	-0.011162	0.167793	0.9889	0.946962
Retinal vascular changes and abnomalities	sense organs	362.4	logistic	26544	156	26388	0.004	0.081	1.004	0.957	0.06	0.08	1.062	0.453	8321	88	8233	0.00111057	0.113959	1.00111	0.992224	0.0536075	0.115132	1.05507	0.641488
Occlusion of cerebral arteries	circulatory system	433.2	logistic	25257	626	24631	-0.002	0.041	0.998	0.957	-0.041	0.041	0.96	0.315	9143	495	8648	-0.0212572	0.0479278	0.978967	0.657386	-0.00253996	0.048648	0.997463	0.958361
Myeloproliferative disease	neoplasms	200	logistic	27507	222	27285	0.004	0.068	1.004	0.958	0.009	0.067	1.009	0.889	9920	71	9849	0.191379	0.123332	1.21092	0.120726	-0.114256	0.124375	0.89203	0.358283
Spirochetal infection	infectious diseases	130	logistic	27781	80	27701	0.006	0.112	1.006	0.959	0.043	0.112	1.043	0.704	9170	2	9168	NA	NA	NA	NA	NA	NA	NA	NA
Elevated white blood cell count	hematopoietic	288.2	logistic	24302	336	23966	0.003	0.055	1.003	0.959	-0.079	0.055	0.924	0.15	8187	223	7964	0.00092642	0.0687748	1.00093	0.989253	0.15028	0.0700818	1.16216	0.0320048
Tracheostomy complications	respiratory	519.1	logistic	27523	33	27490	-0.009	0.175	0.991	0.959	-0.145	0.174	0.865	0.404	9351	15	9336	NA	NA	NA	NA	NA	NA	NA	NA
Hodgkin's disease	neoplasms	201	logistic	27481	196	27285	-0.004	0.072	0.996	0.96	0.049	0.072	1.05	0.494	9890	41	9849	-0.0483725	0.15598	0.952779	0.75647	-0.0374775	0.158909	0.963216	0.813555
Hypovolemia	endocrine/metabolic	276.5	logistic	22197	834	21363	-0.002	0.035	0.998	0.961	-0.029	0.035	0.971	0.411	7099	558	6541	0.0219197	0.0469939	1.02216	0.640903	0.0122349	0.0466429	1.01231	0.793082
Painful respiration	respiratory	512.2	logistic	17894	241	17653	-0.003	0.065	0.997	0.961	0.004	0.065	1.004	0.947	4577	153	4424	0.0313269	0.0846415	1.03182	0.711298	-0.047305	0.0858673	0.953796	0.581697
Secondary malignant neoplasm of liver	neoplasms	198.4	logistic	23725	298	23427	-0.003	0.058	0.997	0.963	0.02	0.058	1.02	0.732	8985	59	8926	-0.167882	0.130076	0.845454	0.196826	0.173329	0.132757	1.18926	0.191685
Trigeminal nerve disorders [CN5]	neurological	352.1	logistic	26297	78	26219	0.005	0.115	1.005	0.963	0.183	0.114	1.201	0.108	8368	29	8339	-0.184658	0.190215	0.831388	0.331654	-0.0375535	0.195938	0.963143	0.848008
Genitourinary congenital anomalies	congenital anomalies	751	logistic	28540	321	28219	-0.003	0.056	0.997	0.963	-0.006	0.056	0.994	0.908	10032	118	9914	0.158374	0.0956071	1.1716	0.0976185	-0.0374078	0.0969426	0.963283	0.699589
Hammer toe (acquired)	musculoskeletal	735.21	logistic	26900	92	26808	0.005	0.105	1.005	0.965	-0.016	0.105	0.984	0.879	9034	82	8952	-0.00350652	0.114084	0.9965	0.97548	-0.147081	0.116377	0.863224	0.20629
Joint effusions	musculoskeletal	741.4	logistic	27070	254	26816	0.003	0.063	1.003	0.966	0.01	0.063	1.01	0.875	8690	291	8399	0.0603372	0.0622685	1.06219	0.332553	0.0823519	0.0634218	1.08584	0.194123
Prostatitis	genitourinary	601.1	logistic	24131	174	23957	-0.003	0.076	0.997	0.967	0.019	0.077	1.019	0.805	8893	54	8839	-0.0126842	0.148327	0.987396	0.931852	-0.198421	0.144358	0.820024	0.169284
Lump or mass in breast	genitourinary	611.3	logistic	27035	450	26585	-0.002	0.049	0.998	0.967	0.013	0.048	1.013	0.792	8775	362	8413	-0.0234777	0.0560082	0.976796	0.675082	-0.0138826	0.0572497	0.986213	0.808399
Circumscribed scleroderma	dermatologic	701.3	logistic	26593	36	26557	-0.007	0.168	0.993	0.967	-0.04	0.168	0.961	0.814	9194	10	9184	NA	NA	NA	NA	NA	NA	NA	NA
Cholelithiasis and cholecystitis	digestive	574	logistic	28101	668	27433	-0.002	0.039	0.998	0.969	-0.037	0.039	0.964	0.349	9865	371	9494	0.00556772	0.0547928	1.00558	0.919063	0.013561	0.0554677	1.01365	0.806856
Arterial embolism and thrombosis of lower extremity artery	circulatory system	444.1	logistic	22992	95	22897	0.004	0.103	1.004	0.97	0.232	0.103	1.261	0.0242	8488	77	8411	0.145764	0.121233	1.15692	0.229228	-0.0911464	0.122601	0.912884	0.457214
Fever of unknown origin	symptoms	783	logistic	27265	1153	26112	0.001	0.03	1.001	0.97	-0.017	0.03	0.983	0.57	9125	543	8582	0.0415025	0.0457489	1.04238	0.364312	0.0549297	0.04629	1.05647	0.235368
Aortic valve disease	circulatory system	394.3	logistic	22023	60	21963	-0.005	0.13	0.995	0.971	-0.283	0.129	0.753	0.0287	8380	12	8368	NA	NA	NA	NA	NA	NA	NA	NA
Other and unspecified complications of birth; puerperium affecting management of mother	pregnancy complications	654	logistic	28623	162	28461	0.003	0.081	1.003	0.971	-0.065	0.081	0.937	0.421	9775	231	9544	0.0244133	0.0732874	1.02471	0.739045	-0.0343378	0.0749151	0.966245	0.646696
Edema	symptoms	782.3	logistic	26635	1598	25037	0.001	0.026	1.001	0.972	-0.015	0.026	0.985	0.556	8836	1201	7635	0.0158716	0.0331297	1.016	0.631884	0.0328035	0.0335208	1.03335	0.327777
Other disorders of soft tissues	musculoskeletal	729	logistic	23862	389	23473	-0.002	0.051	0.998	0.973	-0.049	0.051	0.952	0.334	7059	326	6733	-0.00869514	0.0594876	0.991343	0.883789	-0.0539382	0.0607844	0.947491	0.37488
Encounter for long-term (current) use of aspirin	circulatory system	457.3	logistic	20887	1048	19839	0.001	0.032	1.001	0.974	-0.031	0.032	0.97	0.335	7007	517	6490	0.0146752	0.0482615	1.01478	0.761069	-0.0392955	0.0489983	0.961467	0.422565
Arthralgia/ankylosis of temporomandibular joint	digestive	526.42	logistic	27605	31	27574	0.006	0.181	1.006	0.974	-0.019	0.181	0.981	0.916	8819	7	8812	NA	NA	NA	NA	NA	NA	NA	NA
Occlusion and stenosis of precerebral arteries	circulatory system	433.1	logistic	25693	1062	24631	0.001	0.032	1.001	0.976	-0.071	0.032	0.931	0.0269	8863	215	8648	0.083148	0.070143	1.0867	0.235856	0.0368947	0.0715092	1.03758	0.605894
Polyneuropathy in diabetes	endocrine/metabolic	250.6	logistic	20590	131	20459	-0.003	0.088	0.997	0.977	-0.039	0.087	0.962	0.654	5586	117	5469	0.0968532	0.0987944	1.1017	0.326913	0.0710434	0.0994684	1.07363	0.475084
Gout	endocrine/metabolic	274.1	logistic	28328	1072	27256	-0.001	0.032	0.999	0.978	0.03	0.032	1.031	0.338	9968	641	9327	0.0143181	0.0432816	1.01442	0.740785	0.040584	0.0437221	1.04142	0.35329
Cervicalgia	symptoms	761	logistic	27661	912	26749	0.001	0.034	1.001	0.978	0.002	0.034	1.002	0.948	9116	714	8402	0.00124408	0.0404394	1.00124	0.975458	-0.0289152	0.0411525	0.971499	0.482284
Cachexia	endocrine/metabolic	260.1	logistic	22705	25	22680	-0.005	0.201	0.995	0.979	-0.045	0.201	0.956	0.824	6941	22	6919	0.222205	0.218553	1.24883	0.309292	-0.312786	0.221712	0.731406	0.15831
Hypotension NOS	circulatory system	458.9	logistic	24129	412	23717	-0.001	0.05	0.999	0.979	-0.067	0.05	0.935	0.176	7738	278	7460	0.0886498	0.0642992	1.0927	0.167984	0.0791603	0.0649554	1.08238	0.222963
Intestinal malabsorption (non-celiac)	digestive	557	logistic	21018	126	20892	0.002	0.09	1.002	0.979	-0.033	0.089	0.968	0.713	6505	30	6475	-0.145192	0.185113	0.864856	0.432839	0.0100619	0.191334	1.01011	0.95806
Calculus of ureter	genitourinary	594.3	logistic	27065	158	26907	-0.002	0.08	0.998	0.98	0.016	0.08	1.016	0.845	9700	40	9660	0.0501596	0.160484	1.05144	0.754622	-0.114576	0.161101	0.891744	0.476958
Pathologic fracture of vertebrae	musculoskeletal	743.21	logistic	25861	67	25794	-0.003	0.123	0.997	0.98	-0.038	0.123	0.962	0.756	9245	14	9231	NA	NA	NA	NA	NA	NA	NA	NA
Congenital anomalies of face and neck	congenital anomalies	749	logistic	28981	31	28950	0.004	0.181	1.004	0.981	0.046	0.18	1.047	0.798	10210	11	10199	NA	NA	NA	NA	NA	NA	NA	NA
Curvature of spine	musculoskeletal	737	logistic	27017	209	26808	-0.002	0.07	0.998	0.982	-0.039	0.07	0.962	0.578	9026	74	8952	-0.308177	0.115895	0.734785	0.00783467	0.143422	0.117802	1.15422	0.223421
Other perinatal conditions of fetus or newborn	pregnancy complications	656	logistic	28901	135	28766	0.002	0.088	1.002	0.983	0.022	0.087	1.023	0.797	10099	150	9949	0.061631	0.0894309	1.06357	0.490731	0.164727	0.0916168	1.17907	0.0721763
Lipoprotein disorders	endocrine/metabolic	277.51	logistic	27375	147	27228	-0.002	0.083	0.998	0.984	0.111	0.083	1.117	0.181	9473	35	9438	0.257517	0.178231	1.29371	0.1485	-0.0812664	0.176177	0.921948	0.644599
Other heart block	circulatory system	426.25	logistic	15200	38	15162	0.003	0.162	1.003	0.984	-0.188	0.16	0.829	0.241	5299	8	5291	NA	NA	NA	NA	NA	NA	NA	NA
Gout and other crystal arthropathies	endocrine/metabolic	274	logistic	28356	1100	27256	0.001	0.031	1.001	0.985	0.037	0.031	1.038	0.233	9996	669	9327	0.0260168	0.042429	1.02636	0.539755	0.0369907	0.0428824	1.03768	0.388353
Subarachnoid hemorrhage	circulatory system	430.1	logistic	24686	55	24631	0.002	0.136	1.002	0.988	0.208	0.135	1.232	0.124	8685	37	8648	0.288229	0.174312	1.33406	0.0982234	-0.230311	0.176105	0.794287	0.190941
Polyarteritis nodosa	circulatory system	446.6	logistic	22917	20	22897	-0.003	0.223	0.997	0.988	0.314	0.225	1.368	0.163	8416	5	8411	NA	NA	NA	NA	NA	NA	NA	NA
Acute pancreatitis	digestive	577.1	logistic	28338	197	28141	0.001	0.072	1.001	0.988	0.072	0.071	1.075	0.312	10000	115	9885	0.10359	0.0985391	1.10915	0.293142	0.114225	0.0995921	1.121	0.25141
Other acquired musculoskeletal deformity	musculoskeletal	738	logistic	27111	303	26808	-0.001	0.058	0.999	0.988	0.022	0.058	1.022	0.706	9073	121	8952	0.0686997	0.0938885	1.07111	0.464342	-0.200672	0.0953613	0.818181	0.0353495
Protein-calorie malnutrition	endocrine/metabolic	260	logistic	23775	1095	22680	0	0.031	1	0.989	-0.018	0.031	0.982	0.567	7429	510	6919	0.042441	0.0480252	1.04335	0.376846	0.0730535	0.0486574	1.07579	0.133256
Posttraumatic stress disorder	mental disorders	300.9	logistic	19399	135	19264	-0.001	0.087	0.999	0.989	0.17	0.087	1.186	0.0505	5847	113	5734	-0.161096	0.0980593	0.85121	0.100415	-0.0030081	0.100595	0.996996	0.976144
Dermatophytosis of nail	infectious diseases	110.11	logistic	25842	169	25673	-0.001	0.077	0.999	0.991	0.076	0.077	1.079	0.324	7765	128	7637	-0.120067	0.0916522	0.886861	0.190187	-0.129069	0.0916619	0.878913	0.159102
Dyspareunia	genitourinary	625.1	logistic	27506	32	27474	-0.001	0.18	0.999	0.995	-0.051	0.179	0.95	0.775	8679	20	8659	0.415083	0.239224	1.5145	0.0827199	-0.291611	0.240668	0.747059	0.225636
Esophagitis, GERD and related diseases	digestive	530.1	logistic	23661	5170	18491	0	0.016	1	0.996	-0.02	0.016	0.98	0.212	8283	2560	5723	0.0237087	0.0253374	1.02399	0.349417	-0.0163315	0.025691	0.983801	0.52498
Nodular lymphoma	neoplasms	202.21	logistic	27411	126	27285	0	0.09	1	0.997	-0.185	0.089	0.831	0.0387	9857	8	9849	NA	NA	NA	NA	NA	NA	NA	NA
Inflammatory diseases of prostate	genitourinary	601	logistic	24206	249	23957	0	0.064	1	0.998	-0.065	0.065	0.937	0.312	8947	108	8839	0.00394047	0.105272	1.00395	0.970141	-0.202702	0.103086	0.816521	0.0492592
Uterine/Uterovaginal prolapse	genitourinary	618.2	logistic	28723	94	28629	0	0.105	1	0.998	-0.258	0.106	0.773	0.0146	10110	38	10072	-0.013699	0.167016	0.986394	0.934629	0.00271176	0.171306	1.00272	0.98737
Congenital anomalies of the eye	congenital anomalies	753	logistic	28827	23	28804	-0.001	0.208	0.999	0.998	0.123	0.21	1.131	0.557	10153	8	10145	NA	NA	NA	NA	NA	NA	NA	NA
Certain early complications of trauma or procedure	injuries & poisonings	958	logistic	28853	35	28818	0	0.169	1	0.998	-0.205	0.17	0.815	0.227	10183	19	10164	NA	NA	NA	NA	NA	NA	NA	NA
Abnormal findings on study of brain and/or nervous system	neurological	346	logistic	25053	73	24980	0	0.117	1	0.999	-0.188	0.118	0.829	0.111	8400	31	8369	0.224578	0.191893	1.25179	0.241868	-0.356859	0.196811	0.699871	0.0697999
Intestinal e.coli	infectious diseases	8.51	NA	27937	NA	NA	NA	NA	NA	NA	NA	NA	NA	NA	9472	NA	NA	NA	NA	NA	NA	NA	NA	NA	NA
Intestinal infection due to protozoa	infectious diseases	8.7	logistic	27944	7	27937	NA	NA	NA	NA	NA	NA	NA	NA	9475	3	9472	NA	NA	NA	NA	NA	NA	NA	NA
Leprosy	infectious diseases	31.1	NA	25248	NA	NA	NA	NA	NA	NA	NA	NA	NA	NA	8159	NA	NA	NA	NA	NA	NA	NA	NA	NA	NA
Rheumatic fever / chorea	infectious diseases	41.21	logistic	25259	11	25248	NA	NA	NA	NA	NA	NA	NA	NA	8165	6	8159	NA	NA	NA	NA	NA	NA	NA	NA
Viral hepatitis A	infectious diseases	70.1	logistic	24729	10	24719	NA	NA	NA	NA	NA	NA	NA	NA	7259	3	7256	NA	NA	NA	NA	NA	NA	NA	NA
Varicella infection	infectious diseases	79.1	logistic	24727	8	24719	NA	NA	NA	NA	NA	NA	NA	NA	7263	7	7256	NA	NA	NA	NA	NA	NA	NA	NA
Acute graft-versus-host disease	infectious diseases	81.11	logistic	27677	10	27667	NA	NA	NA	NA	NA	NA	NA	NA	9674	NA	NA	NA	NA	NA	NA	NA	NA	NA	NA
Chronic graft-versus-host disease	infectious diseases	81.12	logistic	27678	11	27667	NA	NA	NA	NA	NA	NA	NA	NA	9675	1	9674	NA	NA	NA	NA	NA	NA	NA	NA
Gonococcal infections	infectious diseases	90.2	logistic	28972	6	28966	NA	NA	NA	NA	NA	NA	NA	NA	9919	17	9902	NA	NA	NA	NA	NA	NA	NA	NA
Venereal diseases due to Chlamydia trachomatis	infectious diseases	90.3	NA	28966	NA	NA	NA	NA	NA	NA	NA	NA	NA	NA	9903	1	9902	NA	NA	NA	NA	NA	NA	NA	NA
Histoplasmosis	infectious diseases	117.1	logistic	25683	10	25673	NA	NA	NA	NA	NA	NA	NA	NA	7639	2	7637	NA	NA	NA	NA	NA	NA	NA	NA
Coccidioidomycosis	infectious diseases	117.2	logistic	25675	2	25673	NA	NA	NA	NA	NA	NA	NA	NA	7638	1	7637	NA	NA	NA	NA	NA	NA	NA	NA
Blastomycotic infection	infectious diseases	117.3	NA	25673	NA	NA	NA	NA	NA	NA	NA	NA	NA	NA	7638	1	7637	NA	NA	NA	NA	NA	NA	NA	NA
Protozoan infection	infectious diseases	131	logistic	27705	4	27701	NA	NA	NA	NA	NA	NA	NA	NA	9282	114	9168	-0.0572503	0.0997606	0.944358	0.566051	0.0191556	0.101963	1.01934	0.85098
Infestation (lice, mites)	infectious diseases	132	logistic	27709	8	27701	NA	NA	NA	NA	NA	NA	NA	NA	9176	8	9168	NA	NA	NA	NA	NA	NA	NA	NA
Pediculosis and phthirus infestation	infectious diseases	132.1	NA	27701	NA	NA	NA	NA	NA	NA	NA	NA	NA	NA	9169	1	9168	NA	NA	NA	NA	NA	NA	NA	NA
Arthropod-borne diseases	infectious diseases	133	logistic	27705	4	27701	NA	NA	NA	NA	NA	NA	NA	NA	9173	5	9168	NA	NA	NA	NA	NA	NA	NA	NA
Helminthiases	infectious diseases	134	logistic	27712	11	27701	NA	NA	NA	NA	NA	NA	NA	NA	9171	3	9168	NA	NA	NA	NA	NA	NA	NA	NA
Intestinal helminthiases	infectious diseases	134.1	logistic	27708	7	27701	NA	NA	NA	NA	NA	NA	NA	NA	9170	2	9168	NA	NA	NA	NA	NA	NA	NA	NA
Cancer of lip	neoplasms	145.1	logistic	28339	2	28337	NA	NA	NA	NA	NA	NA	NA	NA	10167	NA	NA	NA	NA	NA	NA	NA	NA	NA	NA
Cancer of the gums	neoplasms	145.4	logistic	28353	16	28337	NA	NA	NA	NA	NA	NA	NA	NA	10169	2	10167	NA	NA	NA	NA	NA	NA	NA	NA
Cancer of the mouth floor	neoplasms	145.5	logistic	28354	17	28337	NA	NA	NA	NA	NA	NA	NA	NA	10168	1	10167	NA	NA	NA	NA	NA	NA	NA	NA
Cancer of hypopharynx	neoplasms	149.3	logistic	28356	19	28337	NA	NA	NA	NA	NA	NA	NA	NA	10172	5	10167	NA	NA	NA	NA	NA	NA	NA	NA
Breast cancer [male]	neoplasms	174.2	logistic	24497	14	24483	NA	NA	NA	NA	NA	NA	NA	NA	8214	3	8211	NA	NA	NA	NA	NA	NA	NA	NA
Neoplasm of uncertain behavior of breast	neoplasms	174.3	logistic	24492	9	24483	NA	NA	NA	NA	NA	NA	NA	NA	8215	4	8211	NA	NA	NA	NA	NA	NA	NA	NA
Malignant neoplasm of unspecified male genital organ	neoplasms	187.1	logistic	27050	9	27041	NA	NA	NA	NA	NA	NA	NA	NA	9677	8	9669	NA	NA	NA	NA	NA	NA	NA	NA
Cancer of other endocrine glands	neoplasms	194	logistic	27732	19	27713	NA	NA	NA	NA	NA	NA	NA	NA	9896	4	9892	NA	NA	NA	NA	NA	NA	NA	NA
Radiotherapy	neoplasms	196	logistic	23435	8	23427	NA	NA	NA	NA	NA	NA	NA	NA	8929	3	8926	NA	NA	NA	NA	NA	NA	NA	NA
Secondary malignant neoplasm of skin	neoplasms	198.7	logistic	23446	19	23427	NA	NA	NA	NA	NA	NA	NA	NA	8926	NA	NA	NA	NA	NA	NA	NA	NA	NA	NA
Neurofibromatosis	neoplasms	199.4	logistic	23439	12	23427	NA	NA	NA	NA	NA	NA	NA	NA	8938	12	8926	NA	NA	NA	NA	NA	NA	NA	NA
Lymphosarcoma	neoplasms	202.23	logistic	27300	15	27285	NA	NA	NA	NA	NA	NA	NA	NA	9854	5	9849	NA	NA	NA	NA	NA	NA	NA	NA
Monocytic leukemia	neoplasms	204.3	logistic	27292	7	27285	NA	NA	NA	NA	NA	NA	NA	NA	9850	1	9849	NA	NA	NA	NA	NA	NA	NA	NA
Other benign neoplasm of uterus	neoplasms	218.2	logistic	26644	1	26643	NA	NA	NA	NA	NA	NA	NA	NA	8807	NA	NA	NA	NA	NA	NA	NA	NA	NA	NA
Benign neoplasm of other female genital organs	neoplasms	221	NA	23350	NA	NA	NA	NA	NA	NA	NA	NA	NA	NA	7599	NA	NA	NA	NA	NA	NA	NA	NA	NA	NA
Benign neoplasm of male genital organs	neoplasms	222	logistic	27051	10	27041	NA	NA	NA	NA	NA	NA	NA	NA	9674	5	9669	NA	NA	NA	NA	NA	NA	NA	NA
Benign neoplasm of spinal cord, meninges	neoplasms	225.2	logistic	28264	12	28252	NA	NA	NA	NA	NA	NA	NA	NA	10114	3	10111	NA	NA	NA	NA	NA	NA	NA	NA
Benign neoplasm of parathyroid gland	neoplasms	227.2	logistic	27730	17	27713	NA	NA	NA	NA	NA	NA	NA	NA	9902	10	9892	NA	NA	NA	NA	NA	NA	NA	NA
Benign neoplasm of lymph nodes	neoplasms	229.1	logistic	28965	1	28964	NA	NA	NA	NA	NA	NA	NA	NA	10188	NA	NA	NA	NA	NA	NA	NA	NA	NA	NA
Kaposi's sarcoma	neoplasms	230	logistic	29131	4	29127	NA	NA	NA	NA	NA	NA	NA	NA	10285	5	10280	NA	NA	NA	NA	NA	NA	NA	NA
Toxic multinodular goiter	endocrine/metabolic	242.2	logistic	22330	15	22315	NA	NA	NA	NA	NA	NA	NA	NA	8216	9	8207	NA	NA	NA	NA	NA	NA	NA	NA
Thyrotoxic exophthalmos	endocrine/metabolic	242.31	logistic	22316	1	22315	NA	NA	NA	NA	NA	NA	NA	NA	8210	3	8207	NA	NA	NA	NA	NA	NA	NA	NA
Iodine hypothyroidism	endocrine/metabolic	244.3	NA	22315	NA	NA	NA	NA	NA	NA	NA	NA	NA	NA	8208	1	8207	NA	NA	NA	NA	NA	NA	NA	NA
Congenital hypothyroidism	endocrine/metabolic	244.5	logistic	22320	5	22315	NA	NA	NA	NA	NA	NA	NA	NA	8209	2	8207	NA	NA	NA	NA	NA	NA	NA	NA
Thyroiditis, acute and subacute	endocrine/metabolic	245.1	logistic	22326	11	22315	NA	NA	NA	NA	NA	NA	NA	NA	8211	4	8207	NA	NA	NA	NA	NA	NA	NA	NA
Thyroid cyst	endocrine/metabolic	246.2	logistic	22320	5	22315	NA	NA	NA	NA	NA	NA	NA	NA	8210	3	8207	NA	NA	NA	NA	NA	NA	NA	NA
Type 1 diabetes with ketoacidosis	endocrine/metabolic	250.11	logistic	20474	15	20459	NA	NA	NA	NA	NA	NA	NA	NA	5490	21	5469	0.439263	0.232512	1.55156	0.0588637	-0.280435	0.230355	0.755455	0.223449
Diabetes type 1 with peripheral circulatory disorders	endocrine/metabolic	250.15	logistic	20472	13	20459	NA	NA	NA	NA	NA	NA	NA	NA	5478	9	5469	NA	NA	NA	NA	NA	NA	NA	NA
Glycosuria or Acetonuria	endocrine/metabolic	250.5	logistic	20472	13	20459	NA	NA	NA	NA	NA	NA	NA	NA	5477	8	5469	NA	NA	NA	NA	NA	NA	NA	NA
Abnormality of secretion of glucagon or gastrin	endocrine/metabolic	251.8	logistic	25859	14	25845	NA	NA	NA	NA	NA	NA	NA	NA	8597	2	8595	NA	NA	NA	NA	NA	NA	NA	NA
Acromegaly and gigantism	endocrine/metabolic	253.11	logistic	25859	14	25845	NA	NA	NA	NA	NA	NA	NA	NA	8598	3	8595	NA	NA	NA	NA	NA	NA	NA	NA
Pituitary dwarfism	endocrine/metabolic	253.5	logistic	25846	1	25845	NA	NA	NA	NA	NA	NA	NA	NA	8596	1	8595	NA	NA	NA	NA	NA	NA	NA	NA
Diseases of thymus gland	endocrine/metabolic	254	logistic	25852	7	25845	NA	NA	NA	NA	NA	NA	NA	NA	8603	8	8595	NA	NA	NA	NA	NA	NA	NA	NA
Medulloadrenal hyperfunction	endocrine/metabolic	255.13	NA	25845	NA	NA	NA	NA	NA	NA	NA	NA	NA	NA	8595	NA	NA	NA	NA	NA	NA	NA	NA	NA	NA
Mineralocorticoid deficiency	endocrine/metabolic	255.22	NA	25845	NA	NA	NA	NA	NA	NA	NA	NA	NA	NA	8596	1	8595	NA	NA	NA	NA	NA	NA	NA	NA
Adrenogenital disorders	endocrine/metabolic	255.3	logistic	25853	8	25845	NA	NA	NA	NA	NA	NA	NA	NA	8596	1	8595	NA	NA	NA	NA	NA	NA	NA	NA
Hyperestrogenism	endocrine/metabolic	256.1	NA	25845	NA	NA	NA	NA	NA	NA	NA	NA	NA	NA	8595	NA	NA	NA	NA	NA	NA	NA	NA	NA	NA
Postablative ovarian failure	endocrine/metabolic	258.1	logistic	25850	5	25845	NA	NA	NA	NA	NA	NA	NA	NA	8597	2	8595	NA	NA	NA	NA	NA	NA	NA	NA
Nonspecific abnormal results of other endocrine function study	endocrine/metabolic	259.1	logistic	25851	6	25845	NA	NA	NA	NA	NA	NA	NA	NA	8597	2	8595	NA	NA	NA	NA	NA	NA	NA	NA
Carcinoid syndrome	endocrine/metabolic	259.2	logistic	25860	15	25845	NA	NA	NA	NA	NA	NA	NA	NA	8602	7	8595	NA	NA	NA	NA	NA	NA	NA	NA
Delay in sexual development and puberty NEC	endocrine/metabolic	259.3	NA	25845	NA	NA	NA	NA	NA	NA	NA	NA	NA	NA	8595	NA	NA	NA	NA	NA	NA	NA	NA	NA	NA
Precocious sexual development and puberty NEC	endocrine/metabolic	259.4	NA	25845	NA	NA	NA	NA	NA	NA	NA	NA	NA	NA	8595	NA	NA	NA	NA	NA	NA	NA	NA	NA	NA
Polyglandular activity in multiple endocrine adenomatosis	endocrine/metabolic	259.8	logistic	25860	15	25845	NA	NA	NA	NA	NA	NA	NA	NA	8597	2	8595	NA	NA	NA	NA	NA	NA	NA	NA
Kwashiorkor	endocrine/metabolic	260.21	logistic	22683	3	22680	NA	NA	NA	NA	NA	NA	NA	NA	6920	1	6919	NA	NA	NA	NA	NA	NA	NA	NA
Nutritional marasmus	endocrine/metabolic	260.22	logistic	22682	2	22680	NA	NA	NA	NA	NA	NA	NA	NA	6920	1	6919	NA	NA	NA	NA	NA	NA	NA	NA
Polyphagia	endocrine/metabolic	260.7	logistic	22684	4	22680	NA	NA	NA	NA	NA	NA	NA	NA	6920	1	6919	NA	NA	NA	NA	NA	NA	NA	NA
Vitamin A deficiency	endocrine/metabolic	261.1	logistic	22694	14	22680	NA	NA	NA	NA	NA	NA	NA	NA	6922	3	6919	NA	NA	NA	NA	NA	NA	NA	NA
Vitamin C deficiencies	endocrine/metabolic	261.3	logistic	22684	4	22680	NA	NA	NA	NA	NA	NA	NA	NA	6923	4	6919	NA	NA	NA	NA	NA	NA	NA	NA
Lack of normal physiological development	endocrine/metabolic	264	logistic	22684	4	22680	NA	NA	NA	NA	NA	NA	NA	NA	6923	4	6919	NA	NA	NA	NA	NA	NA	NA	NA
Short stature	endocrine/metabolic	264.1	NA	22680	NA	NA	NA	NA	NA	NA	NA	NA	NA	NA	6920	1	6919	NA	NA	NA	NA	NA	NA	NA	NA
Failure to thrive (childhood)	endocrine/metabolic	264.2	logistic	22682	2	22680	NA	NA	NA	NA	NA	NA	NA	NA	6920	1	6919	NA	NA	NA	NA	NA	NA	NA	NA
Delayed milestones	endocrine/metabolic	264.3	NA	22680	NA	NA	NA	NA	NA	NA	NA	NA	NA	NA	6919	NA	NA	NA	NA	NA	NA	NA	NA	NA	NA
Lack of normal physiological development, unspecified	endocrine/metabolic	264.9	logistic	22682	2	22680	NA	NA	NA	NA	NA	NA	NA	NA	6921	2	6919	NA	NA	NA	NA	NA	NA	NA	NA
Phenylketonuria [PKU]	endocrine/metabolic	270.12	NA	27511	NA	NA	NA	NA	NA	NA	NA	NA	NA	NA	9053	NA	NA	NA	NA	NA	NA	NA	NA	NA	NA
Disorders of amino-acid metabolism	endocrine/metabolic	270.2	logistic	27520	9	27511	NA	NA	NA	NA	NA	NA	NA	NA	9056	3	9053	NA	NA	NA	NA	NA	NA	NA	NA
Disorders of urea cycle metabolism	endocrine/metabolic	270.21	logistic	27517	6	27511	NA	NA	NA	NA	NA	NA	NA	NA	9055	2	9053	NA	NA	NA	NA	NA	NA	NA	NA
Polyclonal hypergammaglobulinemia	endocrine/metabolic	270.31	logistic	27514	3	27511	NA	NA	NA	NA	NA	NA	NA	NA	9058	5	9053	NA	NA	NA	NA	NA	NA	NA	NA
Macroglobulinemia	endocrine/metabolic	270.35	logistic	27523	12	27511	NA	NA	NA	NA	NA	NA	NA	NA	9056	3	9053	NA	NA	NA	NA	NA	NA	NA	NA
Other disorders of carbohydrate transport and metabolism	endocrine/metabolic	271.9	logistic	27589	16	27573	NA	NA	NA	NA	NA	NA	NA	NA	8739	8	8731	NA	NA	NA	NA	NA	NA	NA	NA
Hyperchylomicronemia	endocrine/metabolic	272.14	logistic	14088	4	14084	NA	NA	NA	NA	NA	NA	NA	NA	5192	2	5190	NA	NA	NA	NA	NA	NA	NA	NA
Disorders of copper metabolism	endocrine/metabolic	275.2	logistic	25234	8	25226	NA	NA	NA	NA	NA	NA	NA	NA	8373	NA	NA	NA	NA	NA	NA	NA	NA	NA	NA
Polydipsia	endocrine/metabolic	276.8	logistic	21374	11	21363	NA	NA	NA	NA	NA	NA	NA	NA	6556	15	6541	NA	NA	NA	NA	NA	NA	NA	NA
Disorders of porphyrin metabolism	endocrine/metabolic	277.1	logistic	27232	4	27228	NA	NA	NA	NA	NA	NA	NA	NA	9439	1	9438	NA	NA	NA	NA	NA	NA	NA	NA
Other disorders of purine and pyrimidine metabolism	endocrine/metabolic	277.2	NA	27228	NA	NA	NA	NA	NA	NA	NA	NA	NA	NA	9438	NA	NA	NA	NA	NA	NA	NA	NA	NA	NA
Other deficiencies of circulating enzymes	endocrine/metabolic	277.6	logistic	27238	10	27228	NA	NA	NA	NA	NA	NA	NA	NA	9441	3	9438	NA	NA	NA	NA	NA	NA	NA	NA
Carnitine deficiencies	endocrine/metabolic	277.8	NA	27228	NA	NA	NA	NA	NA	NA	NA	NA	NA	NA	9438	NA	NA	NA	NA	NA	NA	NA	NA	NA	NA
Autoimmune disease NEC	endocrine/metabolic	279.2	logistic	26898	9	26889	NA	NA	NA	NA	NA	NA	NA	NA	9259	3	9256	NA	NA	NA	NA	NA	NA	NA	NA
Folate-deficiency anemia	hematopoietic	281.13	logistic	20084	3	20081	NA	NA	NA	NA	NA	NA	NA	NA	5201	NA	NA	NA	NA	NA	NA	NA	NA	NA	NA
Sickle cell anemia	hematopoietic	282.5	logistic	20084	3	20081	NA	NA	NA	NA	NA	NA	NA	NA	5389	188	5201	0.079015	0.0799164	1.08222	0.3228	0.00406542	0.0793026	1.00407	0.959115
Other hereditary hemolytic anemias	hematopoietic	282.9	logistic	20096	15	20081	NA	NA	NA	NA	NA	NA	NA	NA	5239	38	5201	0.00701712	0.169753	1.00704	0.967027	0.347632	0.170349	1.41571	0.0412806
Non-autoimmune hemolytic anemias	hematopoietic	283.2	logistic	20097	16	20081	NA	NA	NA	NA	NA	NA	NA	NA	5204	3	5201	NA	NA	NA	NA	NA	NA	NA	NA
Hemolytic-uremic syndrome	hematopoietic	283.21	logistic	20091	10	20081	NA	NA	NA	NA	NA	NA	NA	NA	5203	2	5201	NA	NA	NA	NA	NA	NA	NA	NA
Constitutional aplastic anemia	hematopoietic	284.2	logistic	20082	1	20081	NA	NA	NA	NA	NA	NA	NA	NA	5201	NA	NA	NA	NA	NA	NA	NA	NA	NA	NA
Sideroblastic anemia	hematopoietic	285.3	NA	20081	NA	NA	NA	NA	NA	NA	NA	NA	NA	NA	5202	1	5201	NA	NA	NA	NA	NA	NA	NA	NA
Hemoglobinuria	hematopoietic	285.8	logistic	20082	1	20081	NA	NA	NA	NA	NA	NA	NA	NA	5203	2	5201	NA	NA	NA	NA	NA	NA	NA	NA
Congenital factor VIII disorder	hematopoietic	286.13	logistic	20747	6	20741	NA	NA	NA	NA	NA	NA	NA	NA	7977	4	7973	NA	NA	NA	NA	NA	NA	NA	NA
Hemorrhagic disorder due to intrinsic circulating anticoagulants	hematopoietic	286.5	logistic	20743	2	20741	NA	NA	NA	NA	NA	NA	NA	NA	7975	2	7973	NA	NA	NA	NA	NA	NA	NA	NA
Defibrination syndrome	hematopoietic	286.6	logistic	20743	2	20741	NA	NA	NA	NA	NA	NA	NA	NA	7980	7	7973	NA	NA	NA	NA	NA	NA	NA	NA
Spontaneous ecchymoses	hematopoietic	287.1	logistic	20752	11	20741	NA	NA	NA	NA	NA	NA	NA	NA	7978	5	7973	NA	NA	NA	NA	NA	NA	NA	NA
Allergic purpura	hematopoietic	287.2	logistic	20744	3	20741	NA	NA	NA	NA	NA	NA	NA	NA	7973	NA	NA	NA	NA	NA	NA	NA	NA	NA	NA
Qualitative platelet defects	hematopoietic	287.4	logistic	20754	13	20741	NA	NA	NA	NA	NA	NA	NA	NA	7975	2	7973	NA	NA	NA	NA	NA	NA	NA	NA
Dementia with cerebral degenerations	mental disorders	290.12	logistic	25422	17	25405	NA	NA	NA	NA	NA	NA	NA	NA	8372	2	8370	NA	NA	NA	NA	NA	NA	NA	NA
Senile dementia	mental disorders	290.13	logistic	25406	1	25405	NA	NA	NA	NA	NA	NA	NA	NA	8370	NA	NA	NA	NA	NA	NA	NA	NA	NA	NA
Transient mental disorders due to conditions classified elsewhere	mental disorders	291.1	logistic	25414	9	25405	NA	NA	NA	NA	NA	NA	NA	NA	8375	5	8370	NA	NA	NA	NA	NA	NA	NA	NA
Symbolic dysfunction	mental disorders	292.12	logistic	25409	4	25405	NA	NA	NA	NA	NA	NA	NA	NA	8371	1	8370	NA	NA	NA	NA	NA	NA	NA	NA
Hallucinations	mental disorders	292.6	logistic	25417	12	25405	NA	NA	NA	NA	NA	NA	NA	NA	8384	14	8370	NA	NA	NA	NA	NA	NA	NA	NA
Paranoid disorders	mental disorders	295.2	logistic	19270	6	19264	NA	NA	NA	NA	NA	NA	NA	NA	5738	4	5734	NA	NA	NA	NA	NA	NA	NA	NA
Generalized anxiety & phobic disorders	mental disorders	300.2	NA	19264	NA	NA	NA	NA	NA	NA	NA	NA	NA	NA	5734	NA	NA	NA	NA	NA	NA	NA	NA	NA	NA
Schizoid personality disorder	mental disorders	301.1	logistic	19266	2	19264	NA	NA	NA	NA	NA	NA	NA	NA	5735	1	5734	NA	NA	NA	NA	NA	NA	NA	NA
Antisocial/borderline personality disorder	mental disorders	301.2	logistic	19280	16	19264	NA	NA	NA	NA	NA	NA	NA	NA	5744	10	5734	NA	NA	NA	NA	NA	NA	NA	NA
Dissociative disorder	mental disorders	303.1	logistic	19271	7	19264	NA	NA	NA	NA	NA	NA	NA	NA	5740	6	5734	NA	NA	NA	NA	NA	NA	NA	NA
Gastrointestinal malfunction arising from mental factors	mental disorders	303.31	logistic	19271	7	19264	NA	NA	NA	NA	NA	NA	NA	NA	5740	6	5734	NA	NA	NA	NA	NA	NA	NA	NA
Anorexia nervosa	mental disorders	305.21	logistic	19270	6	19264	NA	NA	NA	NA	NA	NA	NA	NA	5735	1	5734	NA	NA	NA	NA	NA	NA	NA	NA
Conduct disorders	mental disorders	312	logistic	28179	7	28172	NA	NA	NA	NA	NA	NA	NA	NA	9936	8	9928	NA	NA	NA	NA	NA	NA	NA	NA
Impulse control disorder	mental disorders	312.3	logistic	28177	5	28172	NA	NA	NA	NA	NA	NA	NA	NA	9931	3	9928	NA	NA	NA	NA	NA	NA	NA	NA
Tics and stuttering	mental disorders	313.2	logistic	28185	13	28172	NA	NA	NA	NA	NA	NA	NA	NA	9933	5	9928	NA	NA	NA	NA	NA	NA	NA	NA
Autism	mental disorders	313.3	logistic	28180	8	28172	NA	NA	NA	NA	NA	NA	NA	NA	9929	1	9928	NA	NA	NA	NA	NA	NA	NA	NA
Learning disorder	mental disorders	315.1	logistic	28174	2	28172	NA	NA	NA	NA	NA	NA	NA	NA	9930	2	9928	NA	NA	NA	NA	NA	NA	NA	NA
Speech and language disorder	mental disorders	315.2	logistic	28176	4	28172	NA	NA	NA	NA	NA	NA	NA	NA	9932	4	9928	NA	NA	NA	NA	NA	NA	NA	NA
Mental retardation	mental disorders	315.3	logistic	28178	6	28172	NA	NA	NA	NA	NA	NA	NA	NA	9942	14	9928	NA	NA	NA	NA	NA	NA	NA	NA
Acute (transverse) myelitis	neurological	323.2	logistic	28682	4	28678	NA	NA	NA	NA	NA	NA	NA	NA	10006	3	10003	NA	NA	NA	NA	NA	NA	NA	NA
Jakob-Creutzfeldt disease	neurological	324.1	NA	28678	NA	NA	NA	NA	NA	NA	NA	NA	NA	NA	10003	NA	NA	NA	NA	NA	NA	NA	NA	NA	NA
Phlebitis and thrombophlebitis of intracranial venous sinuses	neurological	325	logistic	28686	8	28678	NA	NA	NA	NA	NA	NA	NA	NA	10007	4	10003	NA	NA	NA	NA	NA	NA	NA	NA
Cerebral degeneration, unspecified	neurological	331.9	logistic	24986	6	24980	NA	NA	NA	NA	NA	NA	NA	NA	8369	NA	NA	NA	NA	NA	NA	NA	NA	NA	NA
Myoclonus	neurological	333.2	logistic	24993	13	24980	NA	NA	NA	NA	NA	NA	NA	NA	8373	4	8369	NA	NA	NA	NA	NA	NA	NA	NA
Tics and choreas	neurological	333.3	logistic	24986	6	24980	NA	NA	NA	NA	NA	NA	NA	NA	8371	2	8369	NA	NA	NA	NA	NA	NA	NA	NA
Other degenerative diseases of the basal ganglia	neurological	333.8	logistic	24993	13	24980	NA	NA	NA	NA	NA	NA	NA	NA	8370	1	8369	NA	NA	NA	NA	NA	NA	NA	NA
Spinocerebellar disease	neurological	334.1	logistic	24996	16	24980	NA	NA	NA	NA	NA	NA	NA	NA	8371	2	8369	NA	NA	NA	NA	NA	NA	NA	NA
Anterior horn cell disease	neurological	334.2	logistic	24997	17	24980	NA	NA	NA	NA	NA	NA	NA	NA	8374	5	8369	NA	NA	NA	NA	NA	NA	NA	NA
Amyotrophic Lateral Sclerosis	neurological	334.21	logistic	24990	10	24980	NA	NA	NA	NA	NA	NA	NA	NA	8374	5	8369	NA	NA	NA	NA	NA	NA	NA	NA
Peripheral autonomic neuropathy	neurological	337.1	logistic	24991	11	24980	NA	NA	NA	NA	NA	NA	NA	NA	8376	7	8369	NA	NA	NA	NA	NA	NA	NA	NA
Infantile cerebral palsy	neurological	343	logistic	24994	14	24980	NA	NA	NA	NA	NA	NA	NA	NA	8373	4	8369	NA	NA	NA	NA	NA	NA	NA	NA
Nonspecific abnormal results of function study of brain and central nervous system	neurological	346.2	logistic	24988	8	24980	NA	NA	NA	NA	NA	NA	NA	NA	8369	NA	NA	NA	NA	NA	NA	NA	NA	NA	NA
Nonspecific abnormal findings in cerebrospinal fluid	neurological	346.3	logistic	24981	1	24980	NA	NA	NA	NA	NA	NA	NA	NA	8370	1	8369	NA	NA	NA	NA	NA	NA	NA	NA
Cerebral cysts	neurological	348.4	logistic	24994	14	24980	NA	NA	NA	NA	NA	NA	NA	NA	8374	5	8369	NA	NA	NA	NA	NA	NA	NA	NA
Nerve root lesions	neurological	353.2	logistic	26224	5	26219	NA	NA	NA	NA	NA	NA	NA	NA	8344	5	8339	NA	NA	NA	NA	NA	NA	NA	NA
Progressive myopia	sense organs	360.2	logistic	26720	15	26705	NA	NA	NA	NA	NA	NA	NA	NA	8548	14	8534	NA	NA	NA	NA	NA	NA	NA	NA
Hypotony of eye	sense organs	360.3	logistic	26710	5	26705	NA	NA	NA	NA	NA	NA	NA	NA	8536	2	8534	NA	NA	NA	NA	NA	NA	NA	NA
Retinoschisis and retinal cysts	sense organs	361.2	logistic	26710	5	26705	NA	NA	NA	NA	NA	NA	NA	NA	8535	1	8534	NA	NA	NA	NA	NA	NA	NA	NA
Retinopathy of prematurity	sense organs	362.1	logistic	26389	1	26388	NA	NA	NA	NA	NA	NA	NA	NA	8235	2	8233	NA	NA	NA	NA	NA	NA	NA	NA
Toxic maculopathy of retina	sense organs	362.5	NA	26388	NA	NA	NA	NA	NA	NA	NA	NA	NA	NA	8234	1	8233	NA	NA	NA	NA	NA	NA	NA	NA
Chorioretinal scars	sense organs	363.3	logistic	26713	8	26705	NA	NA	NA	NA	NA	NA	NA	NA	8543	9	8534	NA	NA	NA	NA	NA	NA	NA	NA
Choroidal degenerations	sense organs	363.4	logistic	26708	3	26705	NA	NA	NA	NA	NA	NA	NA	NA	8537	3	8534	NA	NA	NA	NA	NA	NA	NA	NA
Corneal opacity	sense organs	364.1	logistic	26718	13	26705	NA	NA	NA	NA	NA	NA	NA	NA	8548	14	8534	NA	NA	NA	NA	NA	NA	NA	NA
Corneal edema	sense organs	364.2	logistic	26715	10	26705	NA	NA	NA	NA	NA	NA	NA	NA	8537	3	8534	NA	NA	NA	NA	NA	NA	NA	NA
Keratoconus	sense organs	364.41	logistic	26719	14	26705	NA	NA	NA	NA	NA	NA	NA	NA	8552	18	8534	NA	NA	NA	NA	NA	NA	NA	NA
Fuchs' dystrophy	sense organs	364.51	logistic	26719	14	26705	NA	NA	NA	NA	NA	NA	NA	NA	8547	13	8534	NA	NA	NA	NA	NA	NA	NA	NA
Cornea replaced by transplant	sense organs	364.9	logistic	26720	15	26705	NA	NA	NA	NA	NA	NA	NA	NA	8546	12	8534	NA	NA	NA	NA	NA	NA	NA	NA
Pseudoexfoliation glaucoma	sense organs	365.5	logistic	26724	19	26705	NA	NA	NA	NA	NA	NA	NA	NA	8537	3	8534	NA	NA	NA	NA	NA	NA	NA	NA
Nonsenile Cataract	sense organs	366.1	logistic	26427	2	26425	NA	NA	NA	NA	NA	NA	NA	NA	8152	3	8149	NA	NA	NA	NA	NA	NA	NA	NA
Traumatic cataract	sense organs	366.3	NA	26425	NA	NA	NA	NA	NA	NA	NA	NA	NA	NA	8150	1	8149	NA	NA	NA	NA	NA	NA	NA	NA
Amblyopia	sense organs	368.1	logistic	27014	16	26998	NA	NA	NA	NA	NA	NA	NA	NA	8673	15	8658	NA	NA	NA	NA	NA	NA	NA	NA
Anisometropia	sense organs	368.3	logistic	27010	12	26998	NA	NA	NA	NA	NA	NA	NA	NA	8662	4	8658	NA	NA	NA	NA	NA	NA	NA	NA
Color vision deficiencies	sense organs	368.5	logistic	27000	2	26998	NA	NA	NA	NA	NA	NA	NA	NA	8661	3	8658	NA	NA	NA	NA	NA	NA	NA	NA
Disorders of accommodation	sense organs	368.7	NA	26998	NA	NA	NA	NA	NA	NA	NA	NA	NA	NA	8658	NA	NA	NA	NA	NA	NA	NA	NA	NA	NA
Psychophysical visual disturbances	sense organs	368.91	logistic	27002	4	26998	NA	NA	NA	NA	NA	NA	NA	NA	8663	5	8658	NA	NA	NA	NA	NA	NA	NA	NA
Corneal ulcer	sense organs	370.1	logistic	26462	12	26450	NA	NA	NA	NA	NA	NA	NA	NA	8520	14	8506	NA	NA	NA	NA	NA	NA	NA	NA
Superficial keratitis	sense organs	370.2	logistic	26451	1	26450	NA	NA	NA	NA	NA	NA	NA	NA	8508	2	8506	NA	NA	NA	NA	NA	NA	NA	NA
Keratoconjunctivitis sicca	sense organs	370.31	logistic	26464	14	26450	NA	NA	NA	NA	NA	NA	NA	NA	8508	2	8506	NA	NA	NA	NA	NA	NA	NA	NA
Conjunctivitis, noninfectious	sense organs	371.2	logistic	26469	19	26450	NA	NA	NA	NA	NA	NA	NA	NA	8532	26	8506	0.245954	0.205646	1.27884	0.231695	-0.184535	0.208415	0.831491	0.375928
Allergic conjunctivitis	sense organs	371.21	logistic	26466	16	26450	NA	NA	NA	NA	NA	NA	NA	NA	8525	19	8506	NA	NA	NA	NA	NA	NA	NA	NA
Noninfectious dermatoses of eyelid	sense organs	371.33	logistic	26454	4	26450	NA	NA	NA	NA	NA	NA	NA	NA	8506	NA	NA	NA	NA	NA	NA	NA	NA	NA	NA
Chronic inflammatory disorders of orbit	sense organs	371.9	logistic	26452	2	26450	NA	NA	NA	NA	NA	NA	NA	NA	8509	3	8506	NA	NA	NA	NA	NA	NA	NA	NA
Lagophthalmos	sense organs	374.2	logistic	26466	16	26450	NA	NA	NA	NA	NA	NA	NA	NA	8510	4	8506	NA	NA	NA	NA	NA	NA	NA	NA
Disorders of the orbit	sense organs	376	logistic	26446	14	26432	NA	NA	NA	NA	NA	NA	NA	NA	8330	7	8323	NA	NA	NA	NA	NA	NA	NA	NA
Nystagmus and other irregular eye movements	sense organs	378.2	logistic	26448	16	26432	NA	NA	NA	NA	NA	NA	NA	NA	8329	6	8323	NA	NA	NA	NA	NA	NA	NA	NA
Aphakia and other disorders of lens	sense organs	379.3	logistic	26440	8	26432	NA	NA	NA	NA	NA	NA	NA	NA	8332	9	8323	NA	NA	NA	NA	NA	NA	NA	NA
Anomalies of pupillary function	sense organs	379.4	logistic	26445	13	26432	NA	NA	NA	NA	NA	NA	NA	NA	8325	2	8323	NA	NA	NA	NA	NA	NA	NA	NA
Disorders of iris and ciliary body	sense organs	379.5	logistic	26451	19	26432	NA	NA	NA	NA	NA	NA	NA	NA	8346	23	8323	-0.0987876	0.21992	0.905935	0.653289	0.355193	0.226217	1.42646	0.116383
Pigmentary iris degeneration	sense organs	379.51	logistic	26436	4	26432	NA	NA	NA	NA	NA	NA	NA	NA	8325	2	8323	NA	NA	NA	NA	NA	NA	NA	NA
Mastoiditis & related conditions	sense organs	381.3	logistic	27015	10	27005	NA	NA	NA	NA	NA	NA	NA	NA	9053	4	9049	NA	NA	NA	NA	NA	NA	NA	NA
Otorrhea	sense organs	381.9	logistic	27016	11	27005	NA	NA	NA	NA	NA	NA	NA	NA	9054	5	9049	NA	NA	NA	NA	NA	NA	NA	NA
Myringitis	sense organs	384.1	logistic	27007	2	27005	NA	NA	NA	NA	NA	NA	NA	NA	9050	1	9049	NA	NA	NA	NA	NA	NA	NA	NA
Tympanosclerosis and middle ear disease related to otitis media	sense organs	385.5	logistic	27007	2	27005	NA	NA	NA	NA	NA	NA	NA	NA	9049	NA	NA	NA	NA	NA	NA	NA	NA	NA	NA
Labyrinthitis	sense organs	386.3	logistic	24272	10	24262	NA	NA	NA	NA	NA	NA	NA	NA	7629	3	7626	NA	NA	NA	NA	NA	NA	NA	NA
Degenerative and vascular disorders of ear	sense organs	389.3	logistic	25673	3	25670	NA	NA	NA	NA	NA	NA	NA	NA	9052	4	9048	NA	NA	NA	NA	NA	NA	NA	NA
Cerebral atherosclerosis	circulatory system	433.12	logistic	24638	7	24631	NA	NA	NA	NA	NA	NA	NA	NA	8661	13	8648	NA	NA	NA	NA	NA	NA	NA	NA
Moyamoya disease	circulatory system	433.32	logistic	24640	9	24631	NA	NA	NA	NA	NA	NA	NA	NA	8654	6	8648	NA	NA	NA	NA	NA	NA	NA	NA
Chronic vascular insufficiency of intestine	circulatory system	441.2	logistic	22912	15	22897	NA	NA	NA	NA	NA	NA	NA	NA	8420	9	8411	NA	NA	NA	NA	NA	NA	NA	NA
Peripheral angiopathy in diseases classified elsewhere	circulatory system	443.7	logistic	22904	7	22897	NA	NA	NA	NA	NA	NA	NA	NA	8413	2	8411	NA	NA	NA	NA	NA	NA	NA	NA
Other specified peripheral vascular diseases	circulatory system	443.8	logistic	22911	14	22897	NA	NA	NA	NA	NA	NA	NA	NA	8415	4	8411	NA	NA	NA	NA	NA	NA	NA	NA
Embolism and thrombosis of abdominal aorta	circulatory system	444.2	logistic	22907	10	22897	NA	NA	NA	NA	NA	NA	NA	NA	8413	2	8411	NA	NA	NA	NA	NA	NA	NA	NA
Atheroembolism	circulatory system	444.5	logistic	22901	4	22897	NA	NA	NA	NA	NA	NA	NA	NA	8411	NA	NA	NA	NA	NA	NA	NA	NA	NA	NA
Thromboangiitis obliterans	circulatory system	446.1	NA	22897	NA	NA	NA	NA	NA	NA	NA	NA	NA	NA	8411	NA	NA	NA	NA	NA	NA	NA	NA	NA	NA
Acute febrile mucocutaneous lymph node syndrome (Kawasaki disease)	circulatory system	446.2	logistic	22898	1	22897	NA	NA	NA	NA	NA	NA	NA	NA	8411	NA	NA	NA	NA	NA	NA	NA	NA	NA	NA
Hypersensitivity angiitis	circulatory system	446.3	logistic	22911	14	22897	NA	NA	NA	NA	NA	NA	NA	NA	8417	6	8411	NA	NA	NA	NA	NA	NA	NA	NA
Takayasu's disease	circulatory system	446.7	logistic	22904	7	22897	NA	NA	NA	NA	NA	NA	NA	NA	8413	2	8411	NA	NA	NA	NA	NA	NA	NA	NA
Thrombotic microangiopathy	circulatory system	446.8	logistic	22906	9	22897	NA	NA	NA	NA	NA	NA	NA	NA	8415	4	8411	NA	NA	NA	NA	NA	NA	NA	NA
Iatrogenic pulmonary embolism and infarction	circulatory system	452.1	logistic	19845	6	19839	NA	NA	NA	NA	NA	NA	NA	NA	6494	4	6490	NA	NA	NA	NA	NA	NA	NA	NA
Postphlebitic syndrome	circulatory system	452.8	logistic	19851	12	19839	NA	NA	NA	NA	NA	NA	NA	NA	6501	11	6490	NA	NA	NA	NA	NA	NA	NA	NA
Chronic venous hypertension	circulatory system	453	logistic	19850	11	19839	NA	NA	NA	NA	NA	NA	NA	NA	6500	10	6490	NA	NA	NA	NA	NA	NA	NA	NA
Acute laryngitis and tracheitis	respiratory	465.4	logistic	24266	14	24252	NA	NA	NA	NA	NA	NA	NA	NA	6833	13	6820	NA	NA	NA	NA	NA	NA	NA	NA
Chronic laryngitis	respiratory	473.1	logistic	21791	8	21783	NA	NA	NA	NA	NA	NA	NA	NA	6168	7	6161	NA	NA	NA	NA	NA	NA	NA	NA
Acute tonsillitis	respiratory	474.1	logistic	21797	14	21783	NA	NA	NA	NA	NA	NA	NA	NA	6174	13	6161	NA	NA	NA	NA	NA	NA	NA	NA
MRSA pneumonia	respiratory	480.13	logistic	24923	7	24916	NA	NA	NA	NA	NA	NA	NA	NA	7932	2	7930	NA	NA	NA	NA	NA	NA	NA	NA
Chronic obstructive asthma with exacerbation	respiratory	495.11	logistic	22926	3	22923	NA	NA	NA	NA	NA	NA	NA	NA	7068	26	7042	-0.383205	0.210698	0.681673	0.0689518	-0.0343736	0.214926	0.96621	0.872935
Acute bronchospasm	respiratory	498	logistic	22938	15	22923	NA	NA	NA	NA	NA	NA	NA	NA	7056	14	7042	NA	NA	NA	NA	NA	NA	NA	NA
Pneumoconiosis	respiratory	500.2	logistic	24029	19	24010	NA	NA	NA	NA	NA	NA	NA	NA	8162	2	8160	NA	NA	NA	NA	NA	NA	NA	NA
Pulmonary congestion and hypostasis	respiratory	503	logistic	24024	14	24010	NA	NA	NA	NA	NA	NA	NA	NA	8182	22	8160	0.220982	0.221472	1.2473	0.318383	0.169826	0.226558	1.1851	0.453501
Respiratory insufficiency	respiratory	509.2	logistic	24020	10	24010	NA	NA	NA	NA	NA	NA	NA	NA	8173	13	8160	NA	NA	NA	NA	NA	NA	NA	NA
Pulmonary insufficiency or respiratory failure following trauma and surgery	respiratory	509.3	logistic	24024	14	24010	NA	NA	NA	NA	NA	NA	NA	NA	8164	4	8160	NA	NA	NA	NA	NA	NA	NA	NA
Respiratory arrest	respiratory	509.5	NA	24010	NA	NA	NA	NA	NA	NA	NA	NA	NA	NA	8160	NA	NA	NA	NA	NA	NA	NA	NA	NA	NA
Abnormal chest sounds	respiratory	512.3	logistic	17667	14	17653	NA	NA	NA	NA	NA	NA	NA	NA	4433	9	4424	NA	NA	NA	NA	NA	NA	NA	NA
Apnea	respiratory	513.31	logistic	28316	18	28298	NA	NA	NA	NA	NA	NA	NA	NA	9682	20	9662	0.0172947	0.237276	1.01745	0.941895	0.0117631	0.239559	1.01183	0.960837
Orthopnea	respiratory	513.32	logistic	28317	19	28298	NA	NA	NA	NA	NA	NA	NA	NA	9682	20	9662	-0.0244789	0.237603	0.975818	0.917943	-0.130034	0.242599	0.878066	0.591957
Hyperventilation	respiratory	513.4	logistic	28303	5	28298	NA	NA	NA	NA	NA	NA	NA	NA	9671	9	9662	NA	NA	NA	NA	NA	NA	NA	NA
Respiratory complications	respiratory	519.2	logistic	27499	9	27490	NA	NA	NA	NA	NA	NA	NA	NA	9340	4	9336	NA	NA	NA	NA	NA	NA	NA	NA
Hereditary disturbances in tooth structure	digestive	520.1	logistic	27578	4	27574	NA	NA	NA	NA	NA	NA	NA	NA	8814	2	8812	NA	NA	NA	NA	NA	NA	NA	NA
Dental abrasion, erosion and attrition	digestive	521.2	NA	27574	NA	NA	NA	NA	NA	NA	NA	NA	NA	NA	8812	NA	NA	NA	NA	NA	NA	NA	NA	NA	NA
Tooth complications likely association with other diseases	digestive	521.4	NA	27574	NA	NA	NA	NA	NA	NA	NA	NA	NA	NA	8812	NA	NA	NA	NA	NA	NA	NA	NA	NA	NA
Pulpitis and necrosis of tooth pulp	digestive	522.1	logistic	27575	1	27574	NA	NA	NA	NA	NA	NA	NA	NA	8813	1	8812	NA	NA	NA	NA	NA	NA	NA	NA
Periodontitis (acute or chronic)	digestive	523.3	logistic	27591	17	27574	NA	NA	NA	NA	NA	NA	NA	NA	8821	9	8812	NA	NA	NA	NA	NA	NA	NA	NA
Acute periodontitis	digestive	523.31	logistic	27585	11	27574	NA	NA	NA	NA	NA	NA	NA	NA	8819	7	8812	NA	NA	NA	NA	NA	NA	NA	NA
Chronic periodontitis	digestive	523.32	logistic	27577	3	27574	NA	NA	NA	NA	NA	NA	NA	NA	8813	1	8812	NA	NA	NA	NA	NA	NA	NA	NA
Dentofacial anomalies, including malocclusion	digestive	524	logistic	27592	18	27574	NA	NA	NA	NA	NA	NA	NA	NA	8817	5	8812	NA	NA	NA	NA	NA	NA	NA	NA
Anomalies of tooth position/malocclusion	digestive	524.3	logistic	27588	14	27574	NA	NA	NA	NA	NA	NA	NA	NA	8817	5	8812	NA	NA	NA	NA	NA	NA	NA	NA
Atrophy of edentulous alveolar ridge	digestive	525.2	logistic	27589	15	27574	NA	NA	NA	NA	NA	NA	NA	NA	8820	8	8812	NA	NA	NA	NA	NA	NA	NA	NA
Cysts of the jaws	digestive	526.1	logistic	27585	11	27574	NA	NA	NA	NA	NA	NA	NA	NA	8817	5	8812	NA	NA	NA	NA	NA	NA	NA	NA
Exostosis of jaw	digestive	526.8	NA	27574	NA	NA	NA	NA	NA	NA	NA	NA	NA	NA	8812	NA	NA	NA	NA	NA	NA	NA	NA	NA	NA
Jaw disease NOS	digestive	526.9	logistic	27588	14	27574	NA	NA	NA	NA	NA	NA	NA	NA	8819	7	8812	NA	NA	NA	NA	NA	NA	NA	NA
Hypertrophy of salivary gland	digestive	527.1	logistic	27023	5	27018	NA	NA	NA	NA	NA	NA	NA	NA	9427	5	9422	NA	NA	NA	NA	NA	NA	NA	NA
Cellulitis and abscess of oral soft tissues	digestive	528.3	logistic	27024	6	27018	NA	NA	NA	NA	NA	NA	NA	NA	9431	9	9422	NA	NA	NA	NA	NA	NA	NA	NA
Cysts of oral soft tissues	digestive	528.4	logistic	27024	6	27018	NA	NA	NA	NA	NA	NA	NA	NA	9426	4	9422	NA	NA	NA	NA	NA	NA	NA	NA
Cyst of the salivary gland	digestive	528.41	logistic	27024	6	27018	NA	NA	NA	NA	NA	NA	NA	NA	9426	4	9422	NA	NA	NA	NA	NA	NA	NA	NA
Sialolithiasis	digestive	528.7	logistic	27036	18	27018	NA	NA	NA	NA	NA	NA	NA	NA	9430	8	9422	NA	NA	NA	NA	NA	NA	NA	NA
Ulcer of esophagus	digestive	530.12	logistic	18509	18	18491	NA	NA	NA	NA	NA	NA	NA	NA	5734	11	5723	NA	NA	NA	NA	NA	NA	NA	NA
Gastroesophageal laceration-hemorrhage syndrome	digestive	530.7	logistic	18493	2	18491	NA	NA	NA	NA	NA	NA	NA	NA	5729	6	5723	NA	NA	NA	NA	NA	NA	NA	NA
Acute gastritis	digestive	535.1	logistic	26107	14	26093	NA	NA	NA	NA	NA	NA	NA	NA	8427	4	8423	NA	NA	NA	NA	NA	NA	NA	NA
Femoral hernia	digestive	550.3	logistic	25288	7	25281	NA	NA	NA	NA	NA	NA	NA	NA	8762	3	8759	NA	NA	NA	NA	NA	NA	NA	NA
Angiodysplasia of intestine (without mention of hemorrhage)	digestive	556.11	logistic	20910	18	20892	NA	NA	NA	NA	NA	NA	NA	NA	6495	20	6475	-0.136632	0.228467	0.872291	0.549815	0.417123	0.237178	1.51759	0.0786304
Toxic gastroenteritis and colitis	digestive	569.1	logistic	25847	12	25835	NA	NA	NA	NA	NA	NA	NA	NA	8646	3	8643	NA	NA	NA	NA	NA	NA	NA	NA
Acute glomerulonephritis, NOS	genitourinary	580.13	logistic	21446	9	21437	NA	NA	NA	NA	NA	NA	NA	NA	6234	1	6233	NA	NA	NA	NA	NA	NA	NA	NA
Renal sclerosis, NOS	genitourinary	580.4	logistic	21456	19	21437	NA	NA	NA	NA	NA	NA	NA	NA	6242	9	6233	NA	NA	NA	NA	NA	NA	NA	NA
Anatomical abnormatilies of kidney and ureters	genitourinary	586.1	logistic	21448	11	21437	NA	NA	NA	NA	NA	NA	NA	NA	6234	1	6233	NA	NA	NA	NA	NA	NA	NA	NA
Small kidney	genitourinary	586.11	logistic	21438	1	21437	NA	NA	NA	NA	NA	NA	NA	NA	6233	NA	NA	NA	NA	NA	NA	NA	NA	NA	NA
Vesicoureteral reflux	genitourinary	586.12	logistic	21447	10	21437	NA	NA	NA	NA	NA	NA	NA	NA	6234	1	6233	NA	NA	NA	NA	NA	NA	NA	NA
Vascular disorders of kidney/hypertrophy	genitourinary	586.3	logistic	21444	7	21437	NA	NA	NA	NA	NA	NA	NA	NA	6244	11	6233	NA	NA	NA	NA	NA	NA	NA	NA
Abnormal results of function study of kidney	genitourinary	589	logistic	21446	9	21437	NA	NA	NA	NA	NA	NA	NA	NA	6245	12	6233	NA	NA	NA	NA	NA	NA	NA	NA
Urethral syndrome	genitourinary	592.21	NA	23287	NA	NA	NA	NA	NA	NA	NA	NA	NA	NA	6893	1	6892	NA	NA	NA	NA	NA	NA	NA	NA
Urethral stricture due to infecton	genitourinary	592.3	NA	23287	NA	NA	NA	NA	NA	NA	NA	NA	NA	NA	6893	1	6892	NA	NA	NA	NA	NA	NA	NA	NA
Urethral hypermobility/ISD	genitourinary	597.8	logistic	26825	15	26810	NA	NA	NA	NA	NA	NA	NA	NA	9329	4	9325	NA	NA	NA	NA	NA	NA	NA	NA
Other cells and casts in urine	genitourinary	598.4	NA	28764	NA	NA	NA	NA	NA	NA	NA	NA	NA	NA	10005	NA	NA	NA	NA	NA	NA	NA	NA	NA	NA
Oliguria and anuria	genitourinary	599.6	logistic	22265	12	22253	NA	NA	NA	NA	NA	NA	NA	NA	6496	7	6489	NA	NA	NA	NA	NA	NA	NA	NA
Urethral discharge	genitourinary	599.7	logistic	22259	6	22253	NA	NA	NA	NA	NA	NA	NA	NA	6502	13	6489	NA	NA	NA	NA	NA	NA	NA	NA
Acute prostatitis	genitourinary	601.11	logistic	23976	19	23957	NA	NA	NA	NA	NA	NA	NA	NA	8845	6	8839	NA	NA	NA	NA	NA	NA	NA	NA
Balanoposthitis	genitourinary	601.4	logistic	23959	2	23957	NA	NA	NA	NA	NA	NA	NA	NA	8842	3	8839	NA	NA	NA	NA	NA	NA	NA	NA
Other inflammatory disorders of male genital organs	genitourinary	601.8	logistic	23969	12	23957	NA	NA	NA	NA	NA	NA	NA	NA	8851	12	8839	NA	NA	NA	NA	NA	NA	NA	NA
Redundant prepuce and phimosis/BXO	genitourinary	604.1	logistic	23793	12	23781	NA	NA	NA	NA	NA	NA	NA	NA	8427	10	8417	NA	NA	NA	NA	NA	NA	NA	NA
Vascular disorders of penis	genitourinary	604.2	NA	23781	NA	NA	NA	NA	NA	NA	NA	NA	NA	NA	8417	NA	NA	NA	NA	NA	NA	NA	NA	NA	NA
Azoospermia and oligospermia	genitourinary	609.11	logistic	23794	13	23781	NA	NA	NA	NA	NA	NA	NA	NA	8419	2	8417	NA	NA	NA	NA	NA	NA	NA	NA
Fibroadenosis of breast	genitourinary	610.2	logistic	26587	2	26585	NA	NA	NA	NA	NA	NA	NA	NA	8417	4	8413	NA	NA	NA	NA	NA	NA	NA	NA
Fibrosclerosis of breast	genitourinary	610.3	logistic	26586	1	26585	NA	NA	NA	NA	NA	NA	NA	NA	8415	2	8413	NA	NA	NA	NA	NA	NA	NA	NA
Galactorrhea	genitourinary	612.1	logistic	26594	9	26585	NA	NA	NA	NA	NA	NA	NA	NA	8441	28	8413	-0.147094	0.197117	0.863212	0.455529	-0.173786	0.20025	0.840476	0.385478
Congenital anomalies of breast	genitourinary	612.3	logistic	26593	8	26585	NA	NA	NA	NA	NA	NA	NA	NA	8413	NA	NA	NA	NA	NA	NA	NA	NA	NA	NA
Inflammatory disease of breast	genitourinary	613.1	logistic	28103	19	28084	NA	NA	NA	NA	NA	NA	NA	NA	9401	36	9365	0.0877231	0.176567	1.09169	0.619312	0.0800981	0.178215	1.08339	0.65311
Pelvic peritoneal adhesions, female (postoperative) (postinfection)	genitourinary	614.1	logistic	28083	3	28080	NA	NA	NA	NA	NA	NA	NA	NA	8528	12	8516	NA	NA	NA	NA	NA	NA	NA	NA
Acute inflammatory pelvic disease	genitourinary	614.31	logistic	28083	3	28080	NA	NA	NA	NA	NA	NA	NA	NA	8525	9	8516	NA	NA	NA	NA	NA	NA	NA	NA
Chronic inflammatory pelvic disease	genitourinary	614.32	logistic	28088	8	28080	NA	NA	NA	NA	NA	NA	NA	NA	8538	22	8516	0.0563688	0.231912	1.05799	0.807958	-0.0389241	0.235385	0.961824	0.868658
Pelvic inflammatory disease, NOS	genitourinary	614.33	logistic	28090	10	28080	NA	NA	NA	NA	NA	NA	NA	NA	8534	18	8516	NA	NA	NA	NA	NA	NA	NA	NA
Inflammatory diseases of uterus, except cervix	genitourinary	614.4	logistic	28085	5	28080	NA	NA	NA	NA	NA	NA	NA	NA	8520	4	8516	NA	NA	NA	NA	NA	NA	NA	NA
Cervicitis and endocervicitis	genitourinary	614.51	logistic	28082	2	28080	NA	NA	NA	NA	NA	NA	NA	NA	8526	10	8516	NA	NA	NA	NA	NA	NA	NA	NA
Cyst or abscess of Bartholin's gland	genitourinary	614.53	logistic	28089	9	28080	NA	NA	NA	NA	NA	NA	NA	NA	8531	15	8516	NA	NA	NA	NA	NA	NA	NA	NA
Abscess or ulceration of vulva	genitourinary	614.54	logistic	28087	7	28080	NA	NA	NA	NA	NA	NA	NA	NA	8540	24	8516	-0.138085	0.213596	0.871024	0.517969	0.500444	0.224677	1.64945	0.0259211
Prolapse of vaginal vault after hysterectomy	genitourinary	618.5	logistic	28634	5	28629	NA	NA	NA	NA	NA	NA	NA	NA	10073	1	10072	NA	NA	NA	NA	NA	NA	NA	NA
Vaginal enterocele, congenital or acquired	genitourinary	618.6	logistic	28640	11	28629	NA	NA	NA	NA	NA	NA	NA	NA	10074	2	10072	NA	NA	NA	NA	NA	NA	NA	NA
Disorders of uterus, NEC	genitourinary	619.2	logistic	27612	15	27597	NA	NA	NA	NA	NA	NA	NA	NA	8506	29	8477	0.142844	0.190542	1.15355	0.453452	0.527413	0.195881	1.69454	0.00709167
Dysplasia of female genital organs	genitourinary	620	logistic	28516	12	28504	NA	NA	NA	NA	NA	NA	NA	NA	9737	24	9713	-0.119572	0.220777	0.8873	0.588097	0.0150224	0.225239	1.01514	0.946824
Dysplasia of cervix	genitourinary	620.1	logistic	28506	2	28504	NA	NA	NA	NA	NA	NA	NA	NA	9724	11	9713	NA	NA	NA	NA	NA	NA	NA	NA
Mucous polyp of cervix	genitourinary	622.2	logistic	28519	15	28504	NA	NA	NA	NA	NA	NA	NA	NA	9721	8	9713	NA	NA	NA	NA	NA	NA	NA	NA
Dystrophy of female genital tract	genitourinary	624.1	logistic	27481	7	27474	NA	NA	NA	NA	NA	NA	NA	NA	8660	1	8659	NA	NA	NA	NA	NA	NA	NA	NA
Atrophy of female genital tract	genitourinary	624.2	logistic	27475	1	27474	NA	NA	NA	NA	NA	NA	NA	NA	8659	NA	NA	NA	NA	NA	NA	NA	NA	NA	NA
Mittelschmerz	genitourinary	626.21	logistic	25389	2	25387	NA	NA	NA	NA	NA	NA	NA	NA	7422	2	7420	NA	NA	NA	NA	NA	NA	NA	NA
Symptomatic artificial menopause	genitourinary	627.21	logistic	25389	2	25387	NA	NA	NA	NA	NA	NA	NA	NA	7422	2	7420	NA	NA	NA	NA	NA	NA	NA	NA
Premenopausal menorrhagia	genitourinary	627.4	logistic	25395	8	25387	NA	NA	NA	NA	NA	NA	NA	NA	7447	27	7420	-0.00150937	0.201644	0.998492	0.994028	0.0911267	0.207175	1.09541	0.660043
Placenta previa and abruptio placenta	pregnancy complications	635.3	logistic	28407	16	28391	NA	NA	NA	NA	NA	NA	NA	NA	9376	20	9356	-0.0792253	0.2409	0.923832	0.742252	0.0725704	0.247743	1.07527	0.769578
Threatened premature labor	pregnancy complications	636.1	logistic	28397	6	28391	NA	NA	NA	NA	NA	NA	NA	NA	9363	7	9356	NA	NA	NA	NA	NA	NA	NA	NA
Early onset of delivery	pregnancy complications	636.2	logistic	28399	8	28391	NA	NA	NA	NA	NA	NA	NA	NA	9380	24	9356	-0.0997385	0.214117	0.905074	0.641349	0.388554	0.225044	1.47485	0.0842455
Cervical incompetence	pregnancy complications	636.8	logistic	28399	8	28391	NA	NA	NA	NA	NA	NA	NA	NA	9412	56	9356	-0.149924	0.143556	0.860773	0.296316	0.122631	0.147042	1.13047	0.404287
Short gestation; low birth weight; and fetal growth retardation	pregnancy complications	637	logistic	28384	3	28381	NA	NA	NA	NA	NA	NA	NA	NA	9361	15	9346	NA	NA	NA	NA	NA	NA	NA	NA
Hyperemesis gravidarum	pregnancy complications	643.1	logistic	29029	2	29027	NA	NA	NA	NA	NA	NA	NA	NA	10010	27	9983	-0.141352	0.210638	0.868183	0.502178	-0.00465227	0.211515	0.995359	0.982452
Infections of genitourinary tract during pregnancy	pregnancy complications	647.1	logistic	28960	19	28941	NA	NA	NA	NA	NA	NA	NA	NA	9879	106	9773	0.125643	0.107271	1.13388	0.241493	-0.0173531	0.10893	0.982797	0.873428
Major puerperal infection	pregnancy complications	647.3	logistic	28944	3	28941	NA	NA	NA	NA	NA	NA	NA	NA	9778	5	9773	NA	NA	NA	NA	NA	NA	NA	NA
Isoimmunization of fetus or newborn	pregnancy complications	656.1	logistic	28767	1	28766	NA	NA	NA	NA	NA	NA	NA	NA	9949	NA	NA	NA	NA	NA	NA	NA	NA	NA	NA
Respiratory conditions of fetus and newborn	pregnancy complications	656.2	NA	28766	NA	NA	NA	NA	NA	NA	NA	NA	NA	NA	9951	2	9949	NA	NA	NA	NA	NA	NA	NA	NA
Interstitial emphysema and related conditions of newborn	pregnancy complications	656.22	NA	28766	NA	NA	NA	NA	NA	NA	NA	NA	NA	NA	9949	NA	NA	NA	NA	NA	NA	NA	NA	NA	NA
Transitory tachypnea or apnea of newborn	pregnancy complications	656.26	NA	28766	NA	NA	NA	NA	NA	NA	NA	NA	NA	NA	9949	NA	NA	NA	NA	NA	NA	NA	NA	NA	NA
Endocrine and metabolic disturbances of fetus and newborn	pregnancy complications	656.3	NA	28766	NA	NA	NA	NA	NA	NA	NA	NA	NA	NA	9949	NA	NA	NA	NA	NA	NA	NA	NA	NA	NA
Hemorrhage of fetus or newborn	pregnancy complications	656.4	logistic	28767	1	28766	NA	NA	NA	NA	NA	NA	NA	NA	9950	1	9949	NA	NA	NA	NA	NA	NA	NA	NA
Hematological disorders of newborn	pregnancy complications	656.5	NA	28766	NA	NA	NA	NA	NA	NA	NA	NA	NA	NA	9949	NA	NA	NA	NA	NA	NA	NA	NA	NA	NA
Perinatal disorders of digestive system	pregnancy complications	656.6	logistic	28770	4	28766	NA	NA	NA	NA	NA	NA	NA	NA	9949	NA	NA	NA	NA	NA	NA	NA	NA	NA	NA
Conditions involving the integument and temperature regulation of fetus and newborn	pregnancy complications	656.7	logistic	28768	2	28766	NA	NA	NA	NA	NA	NA	NA	NA	9949	NA	NA	NA	NA	NA	NA	NA	NA	NA	NA
Perinatal jaundice	pregnancy complications	656.8	logistic	28767	1	28766	NA	NA	NA	NA	NA	NA	NA	NA	9949	NA	NA	NA	NA	NA	NA	NA	NA	NA	NA
Neonatal bradycardia or tachycardia	pregnancy complications	656.9	NA	28766	NA	NA	NA	NA	NA	NA	NA	NA	NA	NA	9949	NA	NA	NA	NA	NA	NA	NA	NA	NA	NA
Infections specific to the perinatal period	pregnancy complications	657	logistic	29128	3	29125	NA	NA	NA	NA	NA	NA	NA	NA	10283	NA	NA	NA	NA	NA	NA	NA	NA	NA	NA
Other complications of the puerperium NEC	pregnancy complications	674	logistic	28899	18	28881	NA	NA	NA	NA	NA	NA	NA	NA	10081	26	10055	0.143729	0.2143	1.15457	0.502417	0.164798	0.215263	1.17916	0.443934
Other disorders of the breast associated with childbirth and disorders of lactation	pregnancy complications	676	logistic	28887	6	28881	NA	NA	NA	NA	NA	NA	NA	NA	10055	NA	NA	NA	NA	NA	NA	NA	NA	NA	NA
Impetigo	dermatologic	686.2	logistic	25676	14	25662	NA	NA	NA	NA	NA	NA	NA	NA	8039	7	8032	NA	NA	NA	NA	NA	NA	NA	NA
Pyogenic granuloma	dermatologic	686.4	logistic	25667	5	25662	NA	NA	NA	NA	NA	NA	NA	NA	8033	1	8032	NA	NA	NA	NA	NA	NA	NA	NA
Pyoderma	dermatologic	686.5	logistic	25672	10	25662	NA	NA	NA	NA	NA	NA	NA	NA	8039	7	8032	NA	NA	NA	NA	NA	NA	NA	NA
Changes in skin texture	dermatologic	687.3	logistic	23512	10	23502	NA	NA	NA	NA	NA	NA	NA	NA	6514	9	6505	NA	NA	NA	NA	NA	NA	NA	NA
Ichthyosis congenita	dermatologic	691.1	logistic	24208	4	24204	NA	NA	NA	NA	NA	NA	NA	NA	8028	6	8022	NA	NA	NA	NA	NA	NA	NA	NA
Congenital pigmentary anomalies of skin	dermatologic	691.3	logistic	24210	6	24204	NA	NA	NA	NA	NA	NA	NA	NA	8022	NA	NA	NA	NA	NA	NA	NA	NA	NA	NA
Vascular disorders of skin	dermatologic	694.3	logistic	24212	8	24204	NA	NA	NA	NA	NA	NA	NA	NA	8024	2	8022	NA	NA	NA	NA	NA	NA	NA	NA
Toxic erythema	dermatologic	695.1	logistic	24208	4	24204	NA	NA	NA	NA	NA	NA	NA	NA	8027	5	8022	NA	NA	NA	NA	NA	NA	NA	NA
Dermatitis herpetiformis	dermatologic	695.21	logistic	24208	4	24204	NA	NA	NA	NA	NA	NA	NA	NA	8024	2	8022	NA	NA	NA	NA	NA	NA	NA	NA
Pemphigus and pemphigoid	dermatologic	695.22	logistic	24220	16	24204	NA	NA	NA	NA	NA	NA	NA	NA	8031	9	8022	NA	NA	NA	NA	NA	NA	NA	NA
Erythema nodosum	dermatologic	695.81	logistic	24214	10	24204	NA	NA	NA	NA	NA	NA	NA	NA	8030	8	8022	NA	NA	NA	NA	NA	NA	NA	NA
Parapsoriasis	dermatologic	696.2	logistic	24213	9	24204	NA	NA	NA	NA	NA	NA	NA	NA	8022	NA	NA	NA	NA	NA	NA	NA	NA	NA	NA
Pityriasis	dermatologic	696.3	logistic	24209	5	24204	NA	NA	NA	NA	NA	NA	NA	NA	8031	9	8022	NA	NA	NA	NA	NA	NA	NA	NA
Keratoderma, acquired	dermatologic	701.1	logistic	26564	7	26557	NA	NA	NA	NA	NA	NA	NA	NA	9188	4	9184	NA	NA	NA	NA	NA	NA	NA	NA
Abnormal granulation tissue	dermatologic	701.5	logistic	26565	8	26557	NA	NA	NA	NA	NA	NA	NA	NA	9186	2	9184	NA	NA	NA	NA	NA	NA	NA	NA
Acquired acanthosis nigricans	dermatologic	701.6	logistic	26560	3	26557	NA	NA	NA	NA	NA	NA	NA	NA	9199	15	9184	NA	NA	NA	NA	NA	NA	NA	NA
Degenerative skin disorders	dermatologic	702.4	logistic	24298	1	24297	NA	NA	NA	NA	NA	NA	NA	NA	8909	NA	NA	NA	NA	NA	NA	NA	NA	NA	NA
Ingrowing nail	dermatologic	703.1	logistic	27131	15	27116	NA	NA	NA	NA	NA	NA	NA	NA	9027	14	9013	NA	NA	NA	NA	NA	NA	NA	NA
Telogen effluvium	dermatologic	704.12	logistic	27124	8	27116	NA	NA	NA	NA	NA	NA	NA	NA	9014	1	9013	NA	NA	NA	NA	NA	NA	NA	NA
Dyshidrosis	dermatologic	705.1	logistic	25933	12	25921	NA	NA	NA	NA	NA	NA	NA	NA	8330	12	8318	NA	NA	NA	NA	NA	NA	NA	NA
Seborrhea	dermatologic	706.3	logistic	25922	1	25921	NA	NA	NA	NA	NA	NA	NA	NA	8318	NA	NA	NA	NA	NA	NA	NA	NA	NA	NA
Polymyositis	dermatologic	709.4	logistic	23895	13	23882	NA	NA	NA	NA	NA	NA	NA	NA	7938	10	7928	NA	NA	NA	NA	NA	NA	NA	NA
Other specified diffuse diseases of connective tissue	dermatologic	709.6	logistic	23894	12	23882	NA	NA	NA	NA	NA	NA	NA	NA	7947	19	7928	NA	NA	NA	NA	NA	NA	NA	NA
Periostitis	musculoskeletal	710.2	logistic	26260	1	26259	NA	NA	NA	NA	NA	NA	NA	NA	8521	NA	NA	NA	NA	NA	NA	NA	NA	NA	NA
Osteopathy resulting from poliomyelitis	musculoskeletal	710.3	logistic	26260	1	26259	NA	NA	NA	NA	NA	NA	NA	NA	8521	NA	NA	NA	NA	NA	NA	NA	NA	NA	NA
Reiter's disease	musculoskeletal	711.2	logistic	26269	10	26259	NA	NA	NA	NA	NA	NA	NA	NA	8527	6	8521	NA	NA	NA	NA	NA	NA	NA	NA
Behcet's syndrome	musculoskeletal	711.3	logistic	26265	6	26259	NA	NA	NA	NA	NA	NA	NA	NA	8522	1	8521	NA	NA	NA	NA	NA	NA	NA	NA
Infective connective tissue disorders	musculoskeletal	712	logistic	26277	18	26259	NA	NA	NA	NA	NA	NA	NA	NA	8536	15	8521	NA	NA	NA	NA	NA	NA	NA	NA
Spinal enthesopathy	musculoskeletal	715.3	logistic	26063	3	26060	NA	NA	NA	NA	NA	NA	NA	NA	8630	3	8627	NA	NA	NA	NA	NA	NA	NA	NA
Unspecified monoarthritis	musculoskeletal	716.2	logistic	26263	4	26259	NA	NA	NA	NA	NA	NA	NA	NA	8526	5	8521	NA	NA	NA	NA	NA	NA	NA	NA
Kaschin-Beck disease	musculoskeletal	716.3	NA	26259	NA	NA	NA	NA	NA	NA	NA	NA	NA	NA	8521	NA	NA	NA	NA	NA	NA	NA	NA	NA	NA
Palindromic rheumatism	musculoskeletal	716.8	logistic	26260	1	26259	NA	NA	NA	NA	NA	NA	NA	NA	8523	2	8521	NA	NA	NA	NA	NA	NA	NA	NA
Other allied disorders of spine	musculoskeletal	721.8	logistic	24383	16	24367	NA	NA	NA	NA	NA	NA	NA	NA	8015	6	8009	NA	NA	NA	NA	NA	NA	NA	NA
Schmorl's nodes	musculoskeletal	722.3	NA	24367	NA	NA	NA	NA	NA	NA	NA	NA	NA	NA	8009	NA	NA	NA	NA	NA	NA	NA	NA	NA	NA
Torticollis	musculoskeletal	723.1	logistic	24379	12	24367	NA	NA	NA	NA	NA	NA	NA	NA	8019	10	8009	NA	NA	NA	NA	NA	NA	NA	NA
Disorders of coccyx	musculoskeletal	724.2	logistic	24377	10	24367	NA	NA	NA	NA	NA	NA	NA	NA	8012	3	8009	NA	NA	NA	NA	NA	NA	NA	NA
Other unspecified back disorders	musculoskeletal	724.9	logistic	24379	12	24367	NA	NA	NA	NA	NA	NA	NA	NA	8015	6	8009	NA	NA	NA	NA	NA	NA	NA	NA
Bursitis disorders	musculoskeletal	727.2	logistic	23491	18	23473	NA	NA	NA	NA	NA	NA	NA	NA	6744	11	6733	NA	NA	NA	NA	NA	NA	NA	NA
Contracture of tendon (sheath)	musculoskeletal	727.7	logistic	23481	8	23473	NA	NA	NA	NA	NA	NA	NA	NA	6734	1	6733	NA	NA	NA	NA	NA	NA	NA	NA
Plica syndrome	musculoskeletal	727.8	logistic	23478	5	23473	NA	NA	NA	NA	NA	NA	NA	NA	6734	1	6733	NA	NA	NA	NA	NA	NA	NA	NA
Muscular calcification and ossification	musculoskeletal	728.1	logistic	23477	4	23473	NA	NA	NA	NA	NA	NA	NA	NA	6734	1	6733	NA	NA	NA	NA	NA	NA	NA	NA
Laxity of ligament or hypermobility syndrome	musculoskeletal	728.2	logistic	23486	13	23473	NA	NA	NA	NA	NA	NA	NA	NA	6737	4	6733	NA	NA	NA	NA	NA	NA	NA	NA
Rheumatism, unspecified and fibrositis	musculoskeletal	729.1	NA	23473	NA	NA	NA	NA	NA	NA	NA	NA	NA	NA	6735	2	6733	NA	NA	NA	NA	NA	NA	NA	NA
Panniculitis	musculoskeletal	729.3	logistic	23479	6	23473	NA	NA	NA	NA	NA	NA	NA	NA	6745	12	6733	NA	NA	NA	NA	NA	NA	NA	NA
Nontraumatic compartment syndrome	musculoskeletal	729.7	logistic	23476	3	23473	NA	NA	NA	NA	NA	NA	NA	NA	6736	3	6733	NA	NA	NA	NA	NA	NA	NA	NA
Osteitis deformans [Paget's disease of bone]	musculoskeletal	731.1	logistic	24862	8	24854	NA	NA	NA	NA	NA	NA	NA	NA	8165	12	8153	NA	NA	NA	NA	NA	NA	NA	NA
Juvenile osteochondrosis	musculoskeletal	732.1	logistic	24863	9	24854	NA	NA	NA	NA	NA	NA	NA	NA	8160	7	8153	NA	NA	NA	NA	NA	NA	NA	NA
Osteochondritis dissecans	musculoskeletal	732.7	logistic	24865	11	24854	NA	NA	NA	NA	NA	NA	NA	NA	8155	2	8153	NA	NA	NA	NA	NA	NA	NA	NA
Cyst of bone	musculoskeletal	733.2	logistic	24860	6	24854	NA	NA	NA	NA	NA	NA	NA	NA	8157	4	8153	NA	NA	NA	NA	NA	NA	NA	NA
Costochondritis	musculoskeletal	733.6	logistic	24864	10	24854	NA	NA	NA	NA	NA	NA	NA	NA	8161	8	8153	NA	NA	NA	NA	NA	NA	NA	NA
Chondromalacia	musculoskeletal	733.9	logistic	24858	4	24854	NA	NA	NA	NA	NA	NA	NA	NA	8153	NA	NA	NA	NA	NA	NA	NA	NA	NA	NA
Claw toe (acquired)	musculoskeletal	735.22	NA	26808	NA	NA	NA	NA	NA	NA	NA	NA	NA	NA	8952	NA	NA	NA	NA	NA	NA	NA	NA	NA	NA
Acquired deformities of forearm	musculoskeletal	736.1	logistic	26814	6	26808	NA	NA	NA	NA	NA	NA	NA	NA	8955	3	8952	NA	NA	NA	NA	NA	NA	NA	NA
Acquired deformities of hip	musculoskeletal	736.3	logistic	26810	2	26808	NA	NA	NA	NA	NA	NA	NA	NA	8954	2	8952	NA	NA	NA	NA	NA	NA	NA	NA
Genu valgum or varum (acquired)	musculoskeletal	736.4	logistic	26825	17	26808	NA	NA	NA	NA	NA	NA	NA	NA	8967	15	8952	NA	NA	NA	NA	NA	NA	NA	NA
Acquired deformities of knee	musculoskeletal	736.5	logistic	26814	6	26808	NA	NA	NA	NA	NA	NA	NA	NA	8966	14	8952	NA	NA	NA	NA	NA	NA	NA	NA
Unequal leg length (acquired)	musculoskeletal	736.6	logistic	26812	4	26808	NA	NA	NA	NA	NA	NA	NA	NA	8952	NA	NA	NA	NA	NA	NA	NA	NA	NA	NA
Lordosis (acquired)	musculoskeletal	737.2	logistic	26809	1	26808	NA	NA	NA	NA	NA	NA	NA	NA	8952	NA	NA	NA	NA	NA	NA	NA	NA	NA	NA
Ankylosis of joint	musculoskeletal	741.1	logistic	26827	11	26816	NA	NA	NA	NA	NA	NA	NA	NA	8413	14	8399	NA	NA	NA	NA	NA	NA	NA	NA
Hemarthrosis	musculoskeletal	741.5	logistic	26826	10	26816	NA	NA	NA	NA	NA	NA	NA	NA	8407	8	8399	NA	NA	NA	NA	NA	NA	NA	NA
Villonodular synovitis	musculoskeletal	741.6	logistic	26820	4	26816	NA	NA	NA	NA	NA	NA	NA	NA	8399	NA	NA	NA	NA	NA	NA	NA	NA	NA	NA
Loose body in joint	musculoskeletal	742.1	logistic	26823	7	26816	NA	NA	NA	NA	NA	NA	NA	NA	8402	3	8399	NA	NA	NA	NA	NA	NA	NA	NA
Pathological, developmental or recurrent dislocation	musculoskeletal	742.2	logistic	26826	10	26816	NA	NA	NA	NA	NA	NA	NA	NA	8408	9	8399	NA	NA	NA	NA	NA	NA	NA	NA
Articular cartilage disorder	musculoskeletal	742.8	logistic	26829	13	26816	NA	NA	NA	NA	NA	NA	NA	NA	8404	5	8399	NA	NA	NA	NA	NA	NA	NA	NA
Senile osteoporosis	musculoskeletal	743.12	logistic	25802	8	25794	NA	NA	NA	NA	NA	NA	NA	NA	9233	2	9231	NA	NA	NA	NA	NA	NA	NA	NA
Pathologic fracture of femur	musculoskeletal	743.22	NA	25794	NA	NA	NA	NA	NA	NA	NA	NA	NA	NA	9233	2	9231	NA	NA	NA	NA	NA	NA	NA	NA
Anomalies of respiratory system, congenital	congenital anomalies	748	logistic	28967	17	28950	NA	NA	NA	NA	NA	NA	NA	NA	10207	8	10199	NA	NA	NA	NA	NA	NA	NA	NA
Cleft palate	congenital anomalies	749.1	logistic	25126	7	25119	NA	NA	NA	NA	NA	NA	NA	NA	9021	1	9020	NA	NA	NA	NA	NA	NA	NA	NA
Congenital anomalies of skull and face bones	congenital anomalies	749.2	logistic	28954	4	28950	NA	NA	NA	NA	NA	NA	NA	NA	10199	NA	NA	NA	NA	NA	NA	NA	NA	NA	NA
Upper gastrointestinal congenital anomalies	congenital anomalies	750.1	logistic	28238	19	28219	NA	NA	NA	NA	NA	NA	NA	NA	9928	14	9914	NA	NA	NA	NA	NA	NA	NA	NA
Esophageal atresia/tracheoesophageal fistula	congenital anomalies	750.11	logistic	28225	6	28219	NA	NA	NA	NA	NA	NA	NA	NA	9921	7	9914	NA	NA	NA	NA	NA	NA	NA	NA
Congenital anomalies of mouth/tongue	congenital anomalies	750.13	logistic	28226	7	28219	NA	NA	NA	NA	NA	NA	NA	NA	9916	2	9914	NA	NA	NA	NA	NA	NA	NA	NA
Congenital anomalies of esophagus	congenital anomalies	750.14	logistic	28221	2	28219	NA	NA	NA	NA	NA	NA	NA	NA	9915	1	9914	NA	NA	NA	NA	NA	NA	NA	NA
Congenital anomalies of stomach	congenital anomalies	750.15	logistic	28220	1	28219	NA	NA	NA	NA	NA	NA	NA	NA	9915	1	9914	NA	NA	NA	NA	NA	NA	NA	NA
Congenital hypertrophic pyloric stenosis	congenital anomalies	750.5	logistic	28220	1	28219	NA	NA	NA	NA	NA	NA	NA	NA	9914	NA	NA	NA	NA	NA	NA	NA	NA	NA	NA
Congenital anomalies of male genital organs	congenital anomalies	751.12	logistic	28229	10	28219	NA	NA	NA	NA	NA	NA	NA	NA	9917	3	9914	NA	NA	NA	NA	NA	NA	NA	NA
Obstructive genitourinary defect	congenital anomalies	751.3	logistic	28231	12	28219	NA	NA	NA	NA	NA	NA	NA	NA	9918	4	9914	NA	NA	NA	NA	NA	NA	NA	NA
Spina bifida	congenital anomalies	752.11	logistic	28815	11	28804	NA	NA	NA	NA	NA	NA	NA	NA	10152	7	10145	NA	NA	NA	NA	NA	NA	NA	NA
Congenital cataract and lens anomalies	congenital anomalies	753.1	logistic	28809	5	28804	NA	NA	NA	NA	NA	NA	NA	NA	10145	NA	NA	NA	NA	NA	NA	NA	NA	NA	NA
Congenital anomalies of posterior segment of eye	congenital anomalies	753.2	logistic	28812	8	28804	NA	NA	NA	NA	NA	NA	NA	NA	10148	3	10145	NA	NA	NA	NA	NA	NA	NA	NA
Lumbosacral spondylolysis, congenital	congenital anomalies	754.1	logistic	28494	1	28493	NA	NA	NA	NA	NA	NA	NA	NA	9989	NA	NA	NA	NA	NA	NA	NA	NA	NA	NA
Spondylolisthesis, congenital	congenital anomalies	754.2	logistic	28509	16	28493	NA	NA	NA	NA	NA	NA	NA	NA	9998	9	9989	NA	NA	NA	NA	NA	NA	NA	NA
Congenital deformities of feet	congenital anomalies	755.1	logistic	28512	19	28493	NA	NA	NA	NA	NA	NA	NA	NA	10010	21	9989	-0.108475	0.224477	0.897202	0.628931	0.413929	0.232051	1.51275	0.0744588
Congenital anomaly of fingers/toes	congenital anomalies	755.3	logistic	28494	1	28493	NA	NA	NA	NA	NA	NA	NA	NA	9993	4	9989	NA	NA	NA	NA	NA	NA	NA	NA
Congenital anomalies of upper limb, including shoulder girdle	congenital anomalies	755.4	logistic	28497	4	28493	NA	NA	NA	NA	NA	NA	NA	NA	9991	2	9989	NA	NA	NA	NA	NA	NA	NA	NA
Congenital hip dysplasia and deformity	congenital anomalies	755.61	logistic	28508	15	28493	NA	NA	NA	NA	NA	NA	NA	NA	9991	2	9989	NA	NA	NA	NA	NA	NA	NA	NA
Congenital anomalies of abdominal wall; diaphram	congenital anomalies	756.1	logistic	28503	10	28493	NA	NA	NA	NA	NA	NA	NA	NA	9997	8	9989	NA	NA	NA	NA	NA	NA	NA	NA
Pectus carinatum	congenital anomalies	756.22	logistic	28495	2	28493	NA	NA	NA	NA	NA	NA	NA	NA	9989	NA	NA	NA	NA	NA	NA	NA	NA	NA	NA
Congenital anomalies of the integument	congenital anomalies	757	logistic	28338	2	28336	NA	NA	NA	NA	NA	NA	NA	NA	9972	1	9971	NA	NA	NA	NA	NA	NA	NA	NA
Anomalies of endocrine glands, congenital	congenital anomalies	759.1	logistic	28354	18	28336	NA	NA	NA	NA	NA	NA	NA	NA	9976	5	9971	NA	NA	NA	NA	NA	NA	NA	NA
Cervicocranial/Cervicobrachial syndrome	symptoms	767	NA	25373	NA	NA	NA	NA	NA	NA	NA	NA	NA	NA	7833	NA	NA	NA	NA	NA	NA	NA	NA	NA	NA
Rhabdomyolysis	symptoms	772.4	logistic	27053	19	27034	NA	NA	NA	NA	NA	NA	NA	NA	8813	28	8785	-0.0474447	0.204895	0.953663	0.816883	-0.197741	0.207942	0.820583	0.341635
Abnormal posture	symptoms	781.2	logistic	28177	4	28173	NA	NA	NA	NA	NA	NA	NA	NA	9500	1	9499	NA	NA	NA	NA	NA	NA	NA	NA
Postprocedural fever	symptoms	783.1	logistic	26118	6	26112	NA	NA	NA	NA	NA	NA	NA	NA	8583	1	8582	NA	NA	NA	NA	NA	NA	NA	NA
Persistent vomiting	symptoms	789.1	logistic	24600	6	24594	NA	NA	NA	NA	NA	NA	NA	NA	6991	8	6983	NA	NA	NA	NA	NA	NA	NA	NA
Abnormal arterial blood gases	symptoms	790.9	logistic	26053	6	26047	NA	NA	NA	NA	NA	NA	NA	NA	8503	2	8501	NA	NA	NA	NA	NA	NA	NA	NA
Abnormal results of other function studies (bladder, pancreas, placenta, spleen, etc)	symptoms	794	logistic	29075	7	29068	NA	NA	NA	NA	NA	NA	NA	NA	10269	8	10261	NA	NA	NA	NA	NA	NA	NA	NA
Elevated carcinoembryonic antigen [CEA]	symptoms	795.81	logistic	28962	9	28953	NA	NA	NA	NA	NA	NA	NA	NA	10087	1	10086	NA	NA	NA	NA	NA	NA	NA	NA
Elevated cancer antigen 125 [CA 125]	symptoms	795.82	logistic	28961	8	28953	NA	NA	NA	NA	NA	NA	NA	NA	10087	1	10086	NA	NA	NA	NA	NA	NA	NA	NA
Colles' fracture	injuries & poisonings	803.21	logistic	26874	16	26858	NA	NA	NA	NA	NA	NA	NA	NA	9086	6	9080	NA	NA	NA	NA	NA	NA	NA	NA
Cerebral laceration and contusion	injuries & poisonings	816	logistic	28438	1	28437	NA	NA	NA	NA	NA	NA	NA	NA	9889	NA	NA	NA	NA	NA	NA	NA	NA	NA	NA
Subdural hemorrhage (injury)	injuries & poisonings	818.1	logistic	28442	5	28437	NA	NA	NA	NA	NA	NA	NA	NA	9895	6	9889	NA	NA	NA	NA	NA	NA	NA	NA
Subarachnoid hemorrhage (injury)	injuries & poisonings	818.2	logistic	28444	7	28437	NA	NA	NA	NA	NA	NA	NA	NA	9896	7	9889	NA	NA	NA	NA	NA	NA	NA	NA
Torus fracture	injuries & poisonings	823	NA	26364	NA	NA	NA	NA	NA	NA	NA	NA	NA	NA	8807	NA	NA	NA	NA	NA	NA	NA	NA	NA	NA
Muscle/tendon sprain	injuries & poisonings	840.1	logistic	26279	4	26275	NA	NA	NA	NA	NA	NA	NA	NA	7846	3	7843	NA	NA	NA	NA	NA	NA	NA	NA
Other sprains and strains	injuries & poisonings	842	logistic	26285	10	26275	NA	NA	NA	NA	NA	NA	NA	NA	7862	19	7843	NA	NA	NA	NA	NA	NA	NA	NA
Complication of nervous system device, implant, and graft	injuries & poisonings	855	logistic	24292	2	24290	NA	NA	NA	NA	NA	NA	NA	NA	8425	3	8422	NA	NA	NA	NA	NA	NA	NA	NA
Vascular complications of surgery and medical procedures	injuries & poisonings	856	logistic	24304	14	24290	NA	NA	NA	NA	NA	NA	NA	NA	8424	2	8422	NA	NA	NA	NA	NA	NA	NA	NA
Open wound or laceration of eye or eyelid	injuries & poisonings	870.1	logistic	27127	10	27117	NA	NA	NA	NA	NA	NA	NA	NA	9055	12	9043	NA	NA	NA	NA	NA	NA	NA	NA
Open wound of ear	injuries & poisonings	870.2	logistic	27124	7	27117	NA	NA	NA	NA	NA	NA	NA	NA	9049	6	9043	NA	NA	NA	NA	NA	NA	NA	NA
Open wound of nose and sinus	injuries & poisonings	870.4	logistic	27121	4	27117	NA	NA	NA	NA	NA	NA	NA	NA	9044	1	9043	NA	NA	NA	NA	NA	NA	NA	NA
Open wound of lip and mouth	injuries & poisonings	870.5	logistic	27129	12	27117	NA	NA	NA	NA	NA	NA	NA	NA	9052	9	9043	NA	NA	NA	NA	NA	NA	NA	NA
Open wound of neck	injuries & poisonings	870.6	logistic	27122	5	27117	NA	NA	NA	NA	NA	NA	NA	NA	9048	5	9043	NA	NA	NA	NA	NA	NA	NA	NA
Open wound of genital organs	injuries & poisonings	870.8	logistic	27118	1	27117	NA	NA	NA	NA	NA	NA	NA	NA	9045	2	9043	NA	NA	NA	NA	NA	NA	NA	NA
Open wound of toe(s)	injuries & poisonings	871.4	logistic	27126	9	27117	NA	NA	NA	NA	NA	NA	NA	NA	9053	10	9043	NA	NA	NA	NA	NA	NA	NA	NA
Traumatic amputation	injuries & poisonings	872	logistic	27135	18	27117	NA	NA	NA	NA	NA	NA	NA	NA	9058	15	9043	NA	NA	NA	NA	NA	NA	NA	NA
Non-healing surgical wound	injuries & poisonings	875	logistic	27127	10	27117	NA	NA	NA	NA	NA	NA	NA	NA	9046	3	9043	NA	NA	NA	NA	NA	NA	NA	NA
Posttraumatic wound infection not elsewhere classified	injuries & poisonings	876	logistic	27122	5	27117	NA	NA	NA	NA	NA	NA	NA	NA	9047	4	9043	NA	NA	NA	NA	NA	NA	NA	NA
Superficial injury, infected	injuries & poisonings	910	logistic	29116	3	29113	NA	NA	NA	NA	NA	NA	NA	NA	10275	NA	NA	NA	NA	NA	NA	NA	NA	NA	NA
Blister	injuries & poisonings	911	logistic	29057	6	29051	NA	NA	NA	NA	NA	NA	NA	NA	10214	13	10201	NA	NA	NA	NA	NA	NA	NA	NA
Toxic effect of venom	injuries & poisonings	913	logistic	28744	15	28729	NA	NA	NA	NA	NA	NA	NA	NA	10086	3	10083	NA	NA	NA	NA	NA	NA	NA	NA
Contact dermatitis and other eczema due to plants [except food]	dermatologic	931	logistic	23416	19	23397	NA	NA	NA	NA	NA	NA	NA	NA	7415	2	7413	NA	NA	NA	NA	NA	NA	NA	NA
Acute dermatitis due to solar radiation	dermatologic	938.1	logistic	23407	10	23397	NA	NA	NA	NA	NA	NA	NA	NA	7416	3	7413	NA	NA	NA	NA	NA	NA	NA	NA
Contact and allergic dermatitis of eyelid	dermatologic	939.1	logistic	23398	1	23397	NA	NA	NA	NA	NA	NA	NA	NA	7413	NA	NA	NA	NA	NA	NA	NA	NA	NA	NA
Adverse reaction to serum or vaccine	injuries & poisonings	941	logistic	23405	8	23397	NA	NA	NA	NA	NA	NA	NA	NA	7415	2	7413	NA	NA	NA	NA	NA	NA	NA	NA
Infusion and transfusion reaction	injuries & poisonings	942	logistic	23402	5	23397	NA	NA	NA	NA	NA	NA	NA	NA	7417	4	7413	NA	NA	NA	NA	NA	NA	NA	NA
Diaper or napkin rash	injuries & poisonings	949.1	NA	23397	NA	NA	NA	NA	NA	NA	NA	NA	NA	NA	7413	NA	NA	NA	NA	NA	NA	NA	NA	NA	NA
Injury to other and unspecified nerves	injuries & poisonings	957	NA	29043	NA	NA	NA	NA	NA	NA	NA	NA	NA	NA	10246	NA	NA	NA	NA	NA	NA	NA	NA	NA	NA
Postoperative shock	injuries & poisonings	958.1	logistic	28828	10	28818	NA	NA	NA	NA	NA	NA	NA	NA	10172	8	10164	NA	NA	NA	NA	NA	NA	NA	NA
Traumatic and surgical subcutaneous emphysema	injuries & poisonings	958.2	NA	28818	NA	NA	NA	NA	NA	NA	NA	NA	NA	NA	10164	NA	NA	NA	NA	NA	NA	NA	NA	NA	NA
Poisoning by antifungal antibiotics	injuries & poisonings	960.3	NA	22628	NA	NA	NA	NA	NA	NA	NA	NA	NA	NA	7561	NA	NA	NA	NA	NA	NA	NA	NA	NA	NA
Insulins and antidiabetic agents causing adverse effects in therapeutic use	injuries & poisonings	962.2	NA	22628	NA	NA	NA	NA	NA	NA	NA	NA	NA	NA	7564	3	7561	NA	NA	NA	NA	NA	NA	NA	NA
Antirheumatics causing adverse effects in therapeutic use	injuries & poisonings	965.2	NA	22628	NA	NA	NA	NA	NA	NA	NA	NA	NA	NA	7561	NA	NA	NA	NA	NA	NA	NA	NA	NA	NA
Salicylates causing adverse effects in therapeutic use	injuries & poisonings	965.3	NA	22628	NA	NA	NA	NA	NA	NA	NA	NA	NA	NA	7562	1	7561	NA	NA	NA	NA	NA	NA	NA	NA
Poisoning by anticonvulsants and anti-Parkinsonism drugs	injuries & poisonings	966	logistic	22636	8	22628	NA	NA	NA	NA	NA	NA	NA	NA	7572	11	7561	NA	NA	NA	NA	NA	NA	NA	NA
Adverse effects of sedatives or other central nervous system depressants and anesthetics	injuries & poisonings	967	logistic	22647	19	22628	NA	NA	NA	NA	NA	NA	NA	NA	7581	20	7561	0.253437	0.237257	1.28845	0.285432	-0.109613	0.239307	0.896181	0.64692
Poisoning by drugs primarily affecting the autonomic nervous system	injuries & poisonings	971	logistic	22629	1	22628	NA	NA	NA	NA	NA	NA	NA	NA	7563	2	7561	NA	NA	NA	NA	NA	NA	NA	NA
Cardiac rhythm regulators causing adverse effects in therapeutic use	injuries & poisonings	972.1	logistic	22644	16	22628	NA	NA	NA	NA	NA	NA	NA	NA	7565	4	7561	NA	NA	NA	NA	NA	NA	NA	NA
Antilipemic and antiarteriosclerotic drugs causing adverse effects in therapeutic use	injuries & poisonings	972.2	NA	22628	NA	NA	NA	NA	NA	NA	NA	NA	NA	NA	7561	NA	NA	NA	NA	NA	NA	NA	NA	NA	NA
Antihypertensive agents causing adverse effects	injuries & poisonings	972.6	logistic	22630	2	22628	NA	NA	NA	NA	NA	NA	NA	NA	7565	4	7561	NA	NA	NA	NA	NA	NA	NA	NA
Poisoning by agents primarily affecting the gastrointestinal system	injuries & poisonings	973	NA	22628	NA	NA	NA	NA	NA	NA	NA	NA	NA	NA	7561	NA	NA	NA	NA	NA	NA	NA	NA	NA	NA
Poisoning by water, mineral, and uric acid metabolism drugs	injuries & poisonings	974	logistic	22635	7	22628	NA	NA	NA	NA	NA	NA	NA	NA	7572	11	7561	NA	NA	NA	NA	NA	NA	NA	NA
Poisoning by agents primarily acting on the smooth and skeletal muscles and respiratory system	injuries & poisonings	975	logistic	22630	2	22628	NA	NA	NA	NA	NA	NA	NA	NA	7563	2	7561	NA	NA	NA	NA	NA	NA	NA	NA
Poisoning by agents primarily affecting skin & mucous membrane, ophthalmological, otorhinolaryngological, & dental drugs	injuries & poisonings	976	logistic	22629	1	22628	NA	NA	NA	NA	NA	NA	NA	NA	7561	NA	NA	NA	NA	NA	NA	NA	NA	NA	NA
Toxic effect of (non-ethyl) alcohol and petroleum and other solvents	injuries & poisonings	981	logistic	28854	1	28853	NA	NA	NA	NA	NA	NA	NA	NA	9889	4	9885	NA	NA	NA	NA	NA	NA	NA	NA
Toxic effect of corrosive aromatics, acids, and caustic alkalis	injuries & poisonings	983	logistic	28854	1	28853	NA	NA	NA	NA	NA	NA	NA	NA	9889	4	9885	NA	NA	NA	NA	NA	NA	NA	NA
Toxic effect of lead and its compounds (including fumes)	injuries & poisonings	984	logistic	28854	1	28853	NA	NA	NA	NA	NA	NA	NA	NA	9889	4	9885	NA	NA	NA	NA	NA	NA	NA	NA
Toxic effect of other metals	injuries & poisonings	985	logistic	28857	4	28853	NA	NA	NA	NA	NA	NA	NA	NA	9885	NA	NA	NA	NA	NA	NA	NA	NA	NA	NA
Toxic effect of carbon monoxide	injuries & poisonings	986	logistic	28856	3	28853	NA	NA	NA	NA	NA	NA	NA	NA	9890	5	9885	NA	NA	NA	NA	NA	NA	NA	NA
Toxic effect of other gases, fumes, or vapors	injuries & poisonings	987	NA	28853	NA	NA	NA	NA	NA	NA	NA	NA	NA	NA	9886	1	9885	NA	NA	NA	NA	NA	NA	NA	NA
Toxic effect of noxious substances eaten as food	injuries & poisonings	988	logistic	28857	4	28853	NA	NA	NA	NA	NA	NA	NA	NA	9885	NA	NA	NA	NA	NA	NA	NA	NA	NA	NA

## Sheet: ST9
Supplementary Table 9: Phenome-wide association with Phecodes in the Yale-Penn sample EUR and AFR samples
				EUR ancestry											AFR ancestry
							Knee				Hip							knee				hip
description	group	phenotype	type	n_total	n_cases	n_controls	beta	SE	OR	p	beta	SE	OR	p	n_total	n_cases	n_controls	beta	SE	OR	p	beta	SE	OR	p
f2_cocus	Age of first use	Cocaine	linear	3520	NA	NA	-0.226	0.07	NA	0.00135	0.003	0.068	NA	0.964	3172	NA	NA	-0.019	0.084	NA	0.824	-0.162	0.099	NA	0.1
z_lt	Lifetime Trauma Assessment	Environment	logistic	5399	3385	2014	-0.079	0.029	0.924	0.0069	-0.019	0.029	0.981	0.51	4806	3106	1700	-0.038	0.031	0.963	0.215	0.119	0.036	1.127	0.000864
k_I_B7	Criteria: Excessive pleasurable activities	Mania	logistic	5402	261	5141	-0.172	0.066	0.842	0.00898	-0.037	0.064	0.964	0.562	4816	231	4585	0.006	0.068	1.006	0.93	-0.047	0.078	0.954	0.547
h10a_9_o	Withdrawal symptom: Nightmares	Other drug	logistic	5414	230	5184	0.181	0.071	1.199	0.0105	0.062	0.068	1.064	0.366	4835	130	4705	0.006	0.087	1.006	0.941	0.062	0.101	1.064	0.536
k29a_mas	Frequency of rapid cycling	Mania	linear	229	NA	NA	0.114	0.049	NA	0.0222	0.027	0.047	NA	0.569	183	NA	NA	-0.046	0.064	NA	0.475	-0.036	0.072	NA	0.615
f1d_1_co	Age of regularly use	Cocaine	linear	2753	NA	NA	-0.198	0.089	NA	0.0257	-0.062	0.086	NA	0.467	2805	NA	NA	-0.104	0.092	NA	0.258	-0.092	0.107	NA	0.391
h10a_4_m	Withdrawal symptom: Insomnia	Marijuana	logistic	5414	693	4721	-0.094	0.043	0.91	0.0284	-0.023	0.042	0.977	0.581	4836	503	4333	-0.054	0.048	0.947	0.26	0.017	0.055	1.017	0.756
h_mj_Var3	Abuse criteria: Legal problems	Marijuana	logistic	5414	134	5280	-0.201	0.092	0.818	0.0288	0.098	0.089	1.103	0.272	4836	182	4654	0.035	0.077	1.036	0.646	-0.122	0.089	0.885	0.17
a14c_chi	Number of children	Demographics	linear	5424	NA	NA	-0.039	0.018	NA	0.0297	-0.012	0.018	NA	0.487	4848	NA	NA	-0.007	0.028	NA	0.809	0.016	0.032	NA	0.608
h10a_10_	Withdrawal symptom: Paranoia	Marijuana	logistic	5414	92	5322	0.236	0.11	1.267	0.0311	0.059	0.106	1.061	0.575	4836	140	4696	0.038	0.088	1.038	0.669	-0.001	0.101	0.999	0.992
h_mj_DepBox1	Criteria: Time spent obtaining/using	Marijuana	logistic	5414	1618	3796	-0.068	0.032	0.934	0.0339	0.042	0.031	1.043	0.176	4836	1489	3347	-0.055	0.032	0.946	0.0869	0.013	0.037	1.013	0.727
b3_5_epi	Epilepsy/seizure	Medical	logistic	5423	337	5086	0.121	0.058	1.129	0.0376	0.028	0.057	1.028	0.625	4850	231	4619	0.179	0.068	1.196	0.00826	0.173	0.078	1.189	0.0265
j33_mse_	Trouble functioning	Depression	logistic	5404	2132	3272	0.061	0.029	1.063	0.0377	0	0.028	1	0.99	4826	1566	3260	-0.047	0.031	0.954	0.126	0.042	0.036	1.043	0.238
h1b_otha	Age of first use	Other drug	linear	1439	NA	NA	-0.227	0.11	NA	0.0392	0.108	0.109	NA	0.324	340	NA	NA	0.106	0.274	NA	0.7	-0.272	0.322	NA	0.4
d16_1_irrsx	Withdrawal symptom: Irritablility	Tobacco	logistic	5423	2609	2814	0.057	0.029	1.059	0.0511	0.038	0.028	1.039	0.174	4850	2055	2795	-0.048	0.03	0.954	0.107	-0.007	0.034	0.993	0.836
l_A1	Criteria: Delusions	Schizophrenia	logistic	5403	84	5319	0.22	0.114	1.246	0.0529	0.018	0.11	1.018	0.87	4819	111	4708	-0.013	0.097	0.987	0.891	0.106	0.111	1.112	0.339
i_ASPD_criterion_A7	Criteria: Lack of remorse	Anti-Social Personality Disorder	logistic	5407	1799	3608	-0.059	0.031	0.943	0.0563	-0.023	0.03	0.978	0.45	4830	1811	3019	-0.026	0.03	0.974	0.389	0.025	0.035	1.026	0.471
h19b_mj1	Age at diagnosis	Marijuana	linear	1367	NA	NA	-0.212	0.112	NA	0.0583	-0.092	0.11	NA	0.404	1211	NA	NA	0.09	0.153	NA	0.554	0.115	0.179	NA	0.519
i_CD_criterion_B3	Criteria: Used weapon	Conduct Disorder	logistic	5407	106	5301	-0.192	0.103	0.825	0.0614	0.14	0.1	1.15	0.162	4832	181	4651	-0.092	0.077	0.912	0.231	0.131	0.088	1.14	0.136
h1a_haln	Number of times used	Other drug	linear	2167	NA	NA	1.445	0.787	NA	0.0664	1.228	0.757	NA	0.105	686	NA	NA	-0.548	1.254	NA	0.662	-1.328	1.465	NA	0.365
j33bx_ra	Incapacitated	Depression	logistic	3225	1755	1470	-0.067	0.037	0.935	0.0677	0.004	0.036	1.004	0.919	2536	1314	1222	0.066	0.04	1.068	0.0951	0.041	0.046	1.042	0.376
e26_1_wdshk1	Withdrawal symptom: Shaking	Alcohol	logistic	5423	1017	4406	0.067	0.037	1.069	0.0695	0.024	0.036	1.025	0.499	4850	676	4174	-0.026	0.042	0.975	0.539	-0.038	0.048	0.963	0.432
f12_1_st	Withdrawal symptom: Depressed mood	Cocaine	logistic	5422	1707	3715	0.055	0.031	1.056	0.0781	0.009	0.03	1.009	0.771	4847	1669	3178	-0.013	0.031	0.987	0.675	-0.042	0.036	0.959	0.236
l_A2	Criteria: Hallucinations	Schizophrenia	logistic	5403	186	5217	0.138	0.078	1.148	0.0786	-0.099	0.075	0.906	0.189	4820	285	4535	0.024	0.061	1.024	0.691	-0.022	0.071	0.978	0.754
j_boxf	Criteria: Fatigue	Depression	logistic	5404	2650	2754	0.05	0.029	1.051	0.0842	-0.003	0.028	0.997	0.928	4826	1944	2882	-0.029	0.03	0.972	0.332	0.012	0.034	1.012	0.721
e24_feet	Symptom of use: Feet numbness	Alcohol	logistic	5423	204	5219	-0.128	0.074	0.88	0.0846	0.073	0.072	1.076	0.311	4850	245	4605	0.032	0.066	1.033	0.628	-0.035	0.077	0.966	0.651
h_ot_DepBox2	Criteria: Unsuccessful effort to decrease use	Other drug	logistic	5415	702	4713	0.073	0.043	1.076	0.0873	0.133	0.042	1.143	0.00139	4835	544	4291	-0.007	0.046	0.993	0.872	0.046	0.053	1.047	0.386
q_C_A	Criteria: Compulsions & repetitive behaviors	OCD	logistic	5400	211	5189	0.12	0.073	1.128	0.0977	0.013	0.071	1.013	0.857	4808	126	4682	-0.132	0.09	0.877	0.144	0.184	0.104	1.202	0.0776
h2b_stim	Days of use per month	Stimulants	linear	934	NA	NA	0.599	0.365	NA	0.101	0.058	0.325	NA	0.859	345	NA	NA	-1.024	0.582	NA	0.0794	-0.476	0.669	NA	0.477
h10a_4_s	Withdrawal symptom: Insomnia	Stimulants	logistic	5414	240	5174	0.112	0.068	1.119	0.102	0.064	0.067	1.066	0.34	4835	91	4744	0.076	0.106	1.079	0.472	-0.041	0.124	0.96	0.743
f_CocDepBox2	Criteria: Continued use despite physical/psychological problems	Cocaine	logistic	5422	2610	2812	0.048	0.03	1.049	0.105	-0.003	0.029	0.997	0.916	4847	2758	2089	-0.037	0.03	0.963	0.219	-0.041	0.035	0.96	0.245
q_C_B	Criteria: Recognize compulsions are excessive	OCD	logistic	5400	189	5211	0.124	0.077	1.132	0.106	0.009	0.074	1.009	0.9	4808	124	4684	-0.124	0.09	0.884	0.169	0.161	0.105	1.175	0.124
h19b_sed	Age at diagnosis	Sedatives	linear	533	NA	NA	0.529	0.328	NA	0.107	-0.414	0.316	NA	0.191	123	NA	NA	0.277	0.839	NA	0.742	-0.866	0.81	NA	0.287
h10a_12_	Withdrawal symptom: Stomach ache	Marijuana	logistic	5414	88	5326	0.178	0.111	1.195	0.109	-0.037	0.107	0.964	0.729	4836	146	4690	-0.09	0.086	0.914	0.298	0	0.099	1	0.998
q_OCD_C_Sum	Compulsion criterion count	OCD	linear	5400	NA	NA	0.012	0.007	NA	0.109	0.003	0.007	NA	0.649	4808	NA	NA	-0.011	0.007	NA	0.108	0.014	0.008	NA	0.0684
l_ct	Criterion count	Schizophrenia	linear	5403	NA	NA	0.009	0.006	NA	0.112	-0.003	0.006	NA	0.559	4820	NA	NA	0.002	0.008	NA	0.794	0.002	0.009	NA	0.868
l_B	Criteria: Social/occupational dysfunction	Schizophrenia	logistic	5403	103	5300	0.163	0.103	1.177	0.115	-0.066	0.1	0.936	0.509	4819	162	4657	0.067	0.08	1.069	0.4	0.064	0.092	1.066	0.486
f12_7_st	Withdrawal symptom: Slowed down	Cocaine	logistic	5422	1169	4253	0.054	0.035	1.056	0.118	-0.023	0.034	0.977	0.497	4847	1294	3553	0.01	0.033	1.01	0.754	-0.028	0.038	0.972	0.457
e24_live	Symptom of use: Liver Disease	Alcohol	logistic	5423	180	5243	-0.124	0.08	0.883	0.119	-0.083	0.077	0.92	0.282	4850	128	4722	-0.085	0.089	0.918	0.34	-0.06	0.106	0.942	0.569
f12	Withdrawal symptom: Sum	Cocaine	linear	5424	NA	NA	0.066	0.042	NA	0.12	-0.018	0.041	NA	0.661	4851	NA	NA	-0.013	0.046	NA	0.778	-0.06	0.053	NA	0.256
p6_anxag	Age at diagnosis	Anxiety	linear	164	NA	NA	-1.125	0.724	NA	0.122	-0.613	0.726	NA	0.4	56	NA	NA	NA	NA	NA	NA	NA	NA	NA	NA
z_1_a4	Number of caregivers	Environment	linear	5085	NA	NA	-0.026	0.017	NA	0.123	-0.002	0.017	NA	0.908	4419	NA	NA	0.01	0.022	NA	0.64	0.017	0.026	NA	0.495
j1	Ever depressed	Depression	logistic	5404	3244	2160	0.045	0.029	1.046	0.125	0	0.028	1	0.992	4826	2556	2270	-0.046	0.029	0.955	0.116	0.021	0.034	1.021	0.531
o_CritA	Criteria: Exposure to traumatic event	PTSD	logistic	5401	2634	2767	-0.044	0.029	0.957	0.126	-0.006	0.028	0.994	0.841	4807	2474	2333	-0.03	0.029	0.971	0.309	0.099	0.034	1.104	0.00337
e24_panc	Symptom of use: Pancreatitis	Alcohol	logistic	5423	73	5350	-0.19	0.124	0.827	0.128	0.105	0.12	1.111	0.382	4850	89	4761	0.08	0.108	1.083	0.459	-0.125	0.126	0.883	0.323
h19b_oth	Age at diagnosis	Other drug	linear	734	NA	NA	0.337	0.221	NA	0.128	-0.018	0.225	NA	0.938	488	NA	NA	-0.247	0.29	NA	0.394	-0.089	0.313	NA	0.775
[truncated: 645 more rows]
