# Supplementary material for: Multi-ancestry Genome-wide Association Study of Inpatient Opioid Dosing Following Knee or Hip Arthroplasty
Source: Research Square preprint supplement (doi:10.21203/rs.3.rs-7330342/v1), 2025-08-21
Supplement: Supplementary file 4 [file d8f7cf785871babfb2c936be.xlsx]

## Sheet: Sheet1
Table 2: Summary of SNPs reaching nominal significance (p < 5 x 10-6) in the cross-ancestry meta-analysis
rsID	chr	pos	A1	A2	P	MAF	Nearest Gene
rs12757683	1	65148949	C	T	3.63e-06	0.076	CACHD1
rs114400205	3	43519541	G	T	8.42e-07	0.018	ANO10
rs12537171	7	141853252	G	A	3.59e-06	0.219	-
rs118049114	9	116342706	G	A	2.13e-06	0.004	RGS3:RP11-168K11.2
rs74539733	10	122865335	G	T	1.75e-06	0.018	-
rs117841923	11	13390084	G	T	3.58e-06	0.001	ARNTL
rs113208954	12	68882207	C	T	1.07e-06	0.007	-
rs79597442	12	130613548	G	A	2.66e-06	0.021	FZD10-AS1
rs141931440	14	63662844	C	T	8.67e-07	0.011	RHOJ
rs117515502	14	103483631	G	A	1.06e-06	0.004	CDC42BPB
rs114102149	15	97969418	C	T	1.43e-06	0.012	-
rs114102149	15	97969418	C	T	1.43e-06	0.012	-
rs74778250	16	12683069	C	T	3.8e-06	0.026	-
rs143032437	21	43426393	G	A	4.73e-06	0.047	ZBTB21
