# Supplementary material for: Multi-ancestry Genome-wide Association Study of Inpatient Opioid Dosing Following Knee or Hip Arthroplasty
Source: Research Square preprint supplement (doi:10.21203/rs.3.rs-7330342/v1), 2025-08-21
Supplement: Supplementary file 5 [file e19ffb16634fd284a1bbdc07.xlsx]

## Sheet: Sheet1
Table 1: Sample characteristics
	Knee Arthroplasty Sample	Hip Arthroplasty Sample
	Mean (S.D.) or	Mean (S.D.) or
	% (N)	% (N)
	18540	9363
Full sample
Age (y)	66.00 (8.63)	66.11 (9.74)
Male	92.2% (17,094)	93.56% (8,760)
Pre-OUD cases	3.77% (700)	4.90% (459)
Estimated MME dose	67.46 (143.65)	63.38 (155.62)
Genetically Inferred ancestry
EUR	75.98% (14,088)	74.89% (7,012)
Age	66.93 (8.41)	67.38 (9.51)
Males	92.74% (13,065)	93.65% (6,567)
Pre-OUD cases	2.90 (409)	3.79 (266)
Estimated MME dose	68.42 (146.20)	70.30 (158.94)
	15.36% (2,847)	19.53% (1,829)
AFR
Age	62.31 (8.29)	61.97 (9.13)
Males	88.51% (2,520)	92.84% (1,698)
Pre-OUD cases	1.50 (212)	2.21 (155)
Estimated MME dose	67.10 (144.66)	62.94 (145.75)
	8.66 (1,606)	5.58% (522)
AMR
Age	64.40 (9.06)	63.67 (10.30)
Males	93.96% (1,509)	94.83% (495)
Pre-OUD cases	0.56 (79)	0.54 (38)
Estimated MME dose	61.76 (124.62)	61.73 (145.79)
